# Supplementary material for: A stereochemical journey around spirocyclic glutamic acid analogs
Source: Royal Society of Chemistry journal article supplement (doi:10.1039/d2ob00146b), 2022-01-01
Supplement: d2ob00146b1.pdf [file d2ob00146b1.pdf]

## A stereochemical journey around spirocyclic glutamic acid analogs

Anton V. Chernykh,<sup>a</sup> Alla V. Chernykh,<sup>a</sup> Dmytro S. Radchenko,<sup>a,b</sup> Pratik Rajesh Chheda,<sup>c</sup> Eduard B. Rusanov,<sup>d</sup> Oleksandr O. Grygorenko,<sup>a,b</sup>  
M. Ashley Spies,<sup>c,e</sup> Dmitriy M. Volochnyuk,<sup>a,b,d</sup> Igor V. Komarov<sup>\*a,b</sup>

<sup>a</sup> *Enamine Ltd. ([www.enamine.net](http://www.enamine.net)) Chervonotkatska Street 78, Kyiv 02094, Ukraine*

<sup>b</sup> *Taras Shevchenko National University of Kyiv, Volodymyrska Street 60, Kyiv 01601, Ukraine*

<sup>c</sup> *Division of Medicinal and Natural Products Chemistry, Department of Pharmaceutics and Experimental Therapeutics, College of Pharmacy University of Iowa City, Iowa 52246, USA*

<sup>d</sup> *Institute of Organic Chemistry, National Academy of Sciences of Ukraine, Murmanska Street 5, Kyiv 02660, Ukraine*

<sup>e</sup> *Department of Biochemistry, Carver College of Medicine University of Iowa City, Iowa 52246, USA*

\*Corresponding author. E-mail: [igor.komarov@knu.ua](mailto:igor.komarov@knu.ua)

### Table of contents.

|                                                                          |     |
|--------------------------------------------------------------------------|-----|
| <sup>1</sup> H NMR spectrum of compound <b>14a</b>                       | S4  |
| APT <sup>13</sup> C{ <sup>1</sup> H} NMR spectrum of compound <b>14a</b> | S5  |
| <sup>1</sup> H NMR spectrum of compound <b>14b</b>                       | S6  |
| APT <sup>13</sup> C{ <sup>1</sup> H} NMR spectrum of compound <b>14b</b> | S7  |
| <sup>1</sup> H NMR spectrum of compound <b>17a</b>                       | S8  |
| APT <sup>13</sup> C{ <sup>1</sup> H} NMR spectrum of compound <b>17a</b> | S9  |
| <sup>1</sup> H NMR spectrum of compound <b>17b</b>                       | S10 |
| APT <sup>13</sup> C{ <sup>1</sup> H} NMR spectrum of compound <b>17b</b> | S11 |
| <sup>1</sup> H NMR spectrum of compound <b>18a</b>                       | S12 |
| APT <sup>13</sup> C{ <sup>1</sup> H} NMR spectrum of compound <b>18a</b> | S13 |
| <sup>1</sup> H NMR spectrum of compound <b>18b</b>                       | S14 |
| APT <sup>13</sup> C{ <sup>1</sup> H} NMR spectrum of compound <b>18b</b> | S15 |
| <sup>1</sup> H NMR spectrum of compound <b>19a</b>                       | S16 |
| APT <sup>13</sup> C{ <sup>1</sup> H} NMR spectrum of compound <b>19a</b> | S17 |
| <sup>1</sup> H NMR spectrum of compound <b>19b</b>                       | S18 |
| APT <sup>13</sup> C{ <sup>1</sup> H} NMR spectrum of compound <b>19b</b> | S19 |
| <sup>1</sup> H NMR spectrum of compound <b>21a</b>                       | S20 |
| APT <sup>13</sup> C{ <sup>1</sup> H} NMR spectrum of compound <b>21a</b> | S21 |
| <sup>1</sup> H NMR spectrum of compound <b>21b</b>                       | S22 |
| APT <sup>13</sup> C{ <sup>1</sup> H} NMR spectrum of compound <b>21b</b> | S23 |
| <sup>1</sup> H NMR spectrum of compound <b>22a</b>                       | S24 |
| APT <sup>13</sup> C{ <sup>1</sup> H} NMR spectrum of compound <b>22a</b> | S25 |
| <sup>1</sup> H NMR spectrum of compound <b>22b</b>                       | S26 |
| APT <sup>13</sup> C{ <sup>1</sup> H} NMR spectrum of compound <b>22b</b> | S27 |
| <sup>1</sup> H NMR spectrum of compound <b>29</b>                        | S28 |
| APT <sup>13</sup> C{ <sup>1</sup> H} NMR spectrum of compound <b>29</b>  | S29 |

|                                                                          |     |
|--------------------------------------------------------------------------|-----|
| <sup>1</sup> H NMR spectrum of compound <b>30a</b>                       | S30 |
| APT <sup>13</sup> C{ <sup>1</sup> H} NMR spectrum of compound <b>30a</b> | S31 |
| <sup>1</sup> H NMR spectrum of compound <b>30b</b>                       | S32 |
| APT <sup>13</sup> C{ <sup>1</sup> H} NMR spectrum of compound <b>30b</b> | S33 |
| <sup>1</sup> H NMR spectrum of compound <b>38</b>                        | S34 |
| APT <sup>13</sup> C{ <sup>1</sup> H} NMR spectrum of compound <b>38</b>  | S35 |
| <sup>1</sup> H NMR spectrum of compound <b>39</b>                        | S36 |
| APT <sup>13</sup> C{ <sup>1</sup> H} NMR spectrum of compound <b>39</b>  | S37 |
| <sup>1</sup> H NMR spectrum of compound <b>40</b>                        | S38 |
| APT <sup>13</sup> C{ <sup>1</sup> H} NMR spectrum of compound <b>40</b>  | S39 |
| <sup>1</sup> H NMR spectrum of compound <b>41</b>                        | S40 |
| APT <sup>13</sup> C{ <sup>1</sup> H} NMR spectrum of compound <b>41</b>  | S41 |
| <sup>1</sup> H NMR spectrum of compound <b>42</b>                        | S42 |
| APT <sup>13</sup> C{ <sup>1</sup> H} NMR spectrum of compound <b>42</b>  | S43 |
| <sup>1</sup> H NMR spectrum of compound <b>43</b>                        | S44 |
| APT <sup>13</sup> C{ <sup>1</sup> H} NMR spectrum of compound <b>43</b>  | S45 |
| <sup>1</sup> H NMR spectrum of compound <b>45</b>                        | S46 |
| APT <sup>13</sup> C{ <sup>1</sup> H} NMR spectrum of compound <b>45</b>  | S47 |
| <sup>31</sup> P{ <sup>1</sup> H} NMR spectrum of compound <b>45</b>      | S48 |
| <sup>1</sup> H NMR spectrum of compound <b>46</b>                        | S49 |
| APT <sup>13</sup> C{ <sup>1</sup> H} NMR spectrum of compound <b>46</b>  | S50 |
| <sup>1</sup> H NMR spectrum of compound <b>47</b>                        | S51 |
| APT <sup>13</sup> C{ <sup>1</sup> H} NMR spectrum of compound <b>47</b>  | S52 |
| <sup>1</sup> H NMR spectrum of compound <b>48a</b>                       | S53 |
| APT <sup>13</sup> C{ <sup>1</sup> H} NMR spectrum of compound <b>48a</b> | S54 |
| <sup>1</sup> H NMR spectrum of compound <b>48b</b>                       | S55 |
| APT <sup>13</sup> C{ <sup>1</sup> H} NMR spectrum of compound <b>48b</b> | S56 |
| <sup>1</sup> H NMR spectrum of compound <b>49a</b>                       | S57 |
| APT <sup>13</sup> C{ <sup>1</sup> H} NMR spectrum of compound <b>49a</b> | S58 |
| <sup>1</sup> H NMR spectrum of compound <b>49b</b>                       | S59 |
| APT <sup>13</sup> C{ <sup>1</sup> H} NMR spectrum of compound <b>49b</b> | S60 |
| <sup>1</sup> H NMR spectrum of compound <b>50a</b>                       | S61 |
| APT <sup>13</sup> C{ <sup>1</sup> H} NMR spectrum of compound <b>50a</b> | S62 |
| <sup>1</sup> H NMR spectrum of compound <b>50b</b>                       | S63 |
| APT <sup>13</sup> C{ <sup>1</sup> H} NMR spectrum of compound <b>50b</b> | S64 |
| <sup>1</sup> H NMR spectrum of compound <b>51a</b>                       | S65 |
| APT <sup>13</sup> C{ <sup>1</sup> H} NMR spectrum of compound <b>51a</b> | S66 |
| <sup>1</sup> H NMR spectrum of compound <b>51b</b>                       | S67 |
| APT <sup>13</sup> C{ <sup>1</sup> H} NMR spectrum of compound <b>51b</b> | S68 |

|                                                                                                                         |      |
|-------------------------------------------------------------------------------------------------------------------------|------|
| <sup>1</sup> H NMR spectrum of compound <b>52a</b>                                                                      | S69  |
| APT <sup>13</sup> C{ <sup>1</sup> H} NMR spectrum of compound <b>52a</b>                                                | S70  |
| <sup>1</sup> H NMR spectrum of compound <b>52b</b>                                                                      | S71  |
| APT <sup>13</sup> C{ <sup>1</sup> H} NMR spectrum of compound <b>52b</b>                                                | S72  |
| <sup>1</sup> H NMR spectrum of compound <b>53a</b>                                                                      | S73  |
| APT <sup>13</sup> C{ <sup>1</sup> H} NMR spectrum of compound <b>53b</b>                                                | S74  |
| <sup>1</sup> H NMR spectrum of compound <b>53b</b>                                                                      | S75  |
| APT <sup>13</sup> C{ <sup>1</sup> H} NMR spectrum of compound <b>53b</b>                                                | S76  |
| <sup>1</sup> H NMR spectrum of compound <b>54b</b>                                                                      | S77  |
| APT <sup>13</sup> C{ <sup>1</sup> H} NMR spectrum of compound <b>54b</b>                                                | S78  |
| <sup>1</sup> H NMR spectrum of compound <b>55a</b>                                                                      | S79  |
| APT <sup>13</sup> C{ <sup>1</sup> H} NMR spectrum of compound <b>55a</b>                                                | S80  |
| <sup>1</sup> H NMR spectrum of compound <b>59</b>                                                                       | S81  |
| APT <sup>13</sup> C{ <sup>1</sup> H} NMR spectrum of compound <b>59</b>                                                 | S82  |
| <sup>1</sup> H NMR spectrum of compound <b>60</b>                                                                       | S83  |
| APT <sup>13</sup> C{ <sup>1</sup> H} NMR spectrum of compound <b>60</b>                                                 | S84  |
| <sup>1</sup> H NMR spectrum of compound <b>62a</b>                                                                      | S85  |
| APT <sup>13</sup> C{ <sup>1</sup> H} NMR spectrum of compound <b>62a</b>                                                | S86  |
| <sup>1</sup> H NMR spectrum of compound <b>62b</b>                                                                      | S87  |
| APT <sup>13</sup> C{ <sup>1</sup> H} NMR spectrum of compound <b>62b</b>                                                | S88  |
| <sup>1</sup> H NMR spectrum of compound <b>63a</b>                                                                      | S89  |
| APT <sup>13</sup> C{ <sup>1</sup> H} NMR spectrum of compound <b>63a</b>                                                | S90  |
| <sup>1</sup> H NMR spectrum of compound <b>63b</b>                                                                      | S91  |
| APT <sup>13</sup> C{ <sup>1</sup> H} NMR spectrum of compound <b>63b</b>                                                | S92  |
| X-Ray diffraction studies and ORTEP diagrams for the compounds <b>50–62</b>                                             | S93  |
| Inhibition of <i>H. Pylori</i> glutamate racemase by the spiro[3.3]heptane-derived amino acids (dose – response curves) | S106 |
| References                                                                                                              | S107 |

<sup>1</sup>H NMR spectrum of compound **14a**

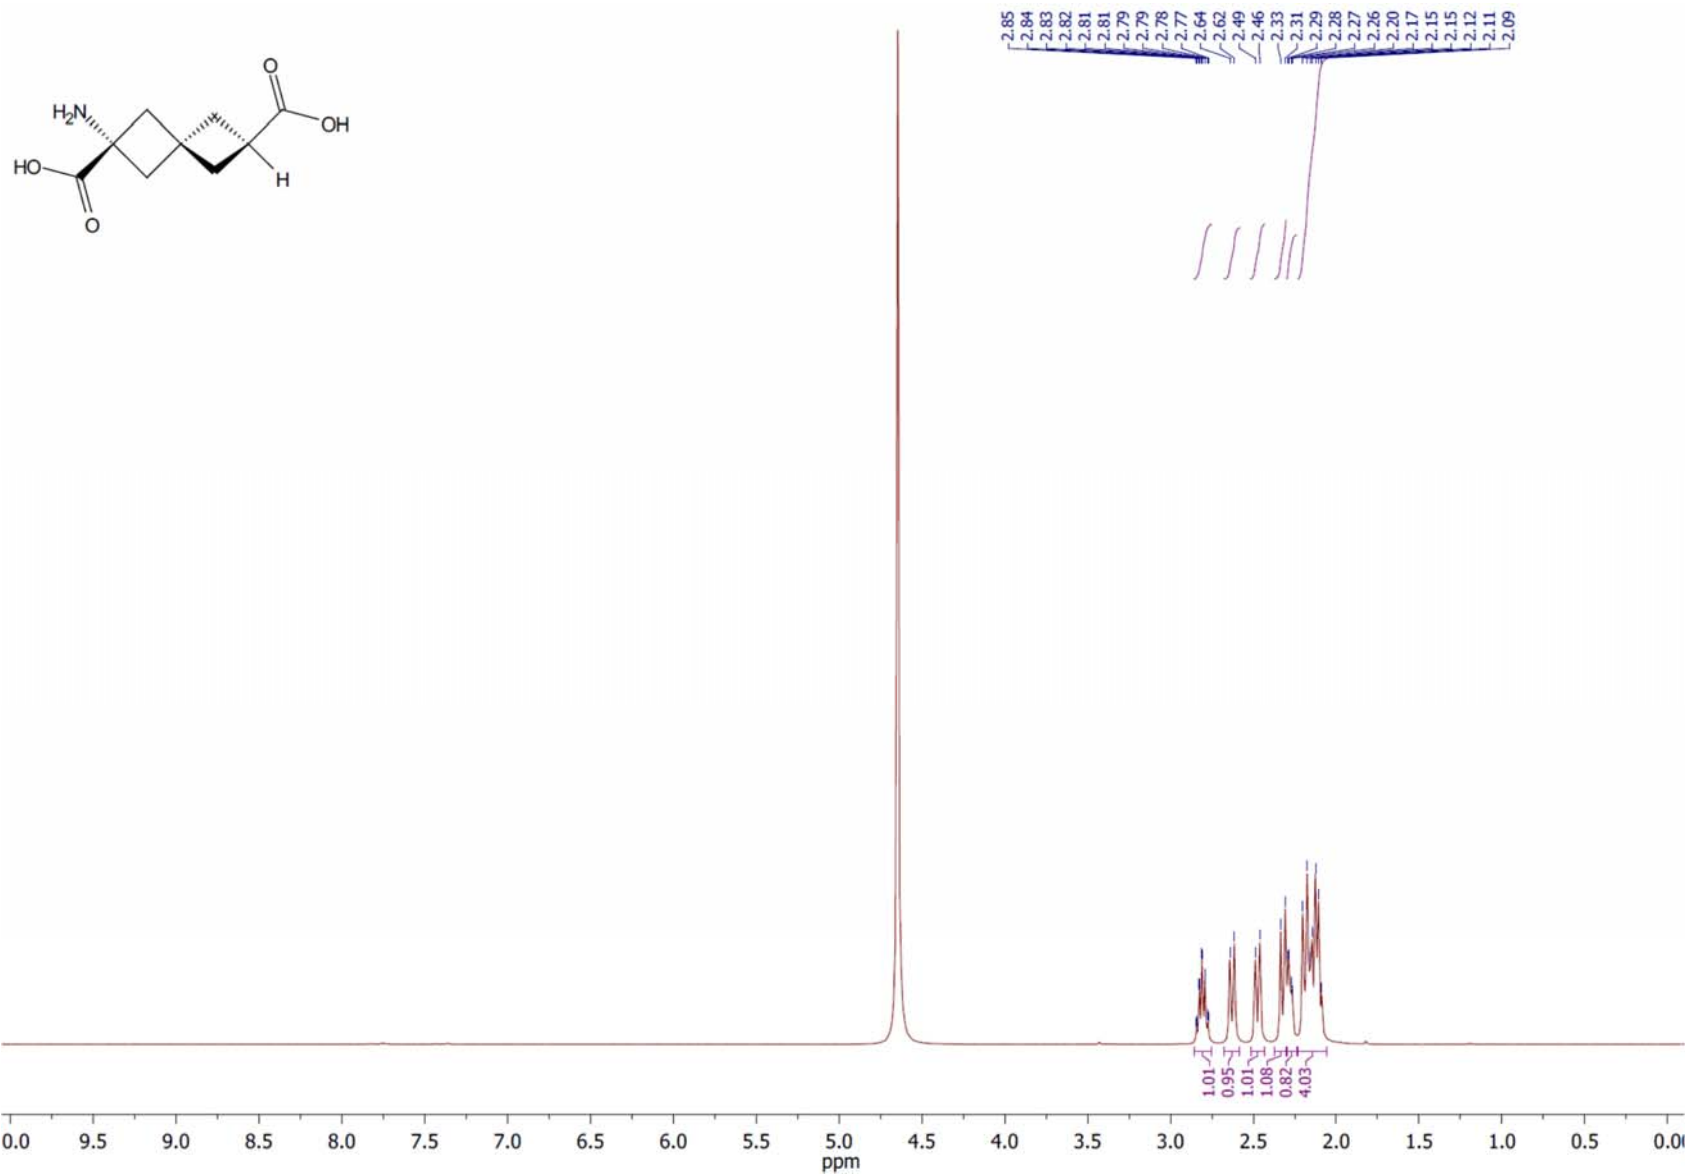

APT  $^{13}\text{C}\{^1\text{H}\}$  NMR spectrum of compound **14a**

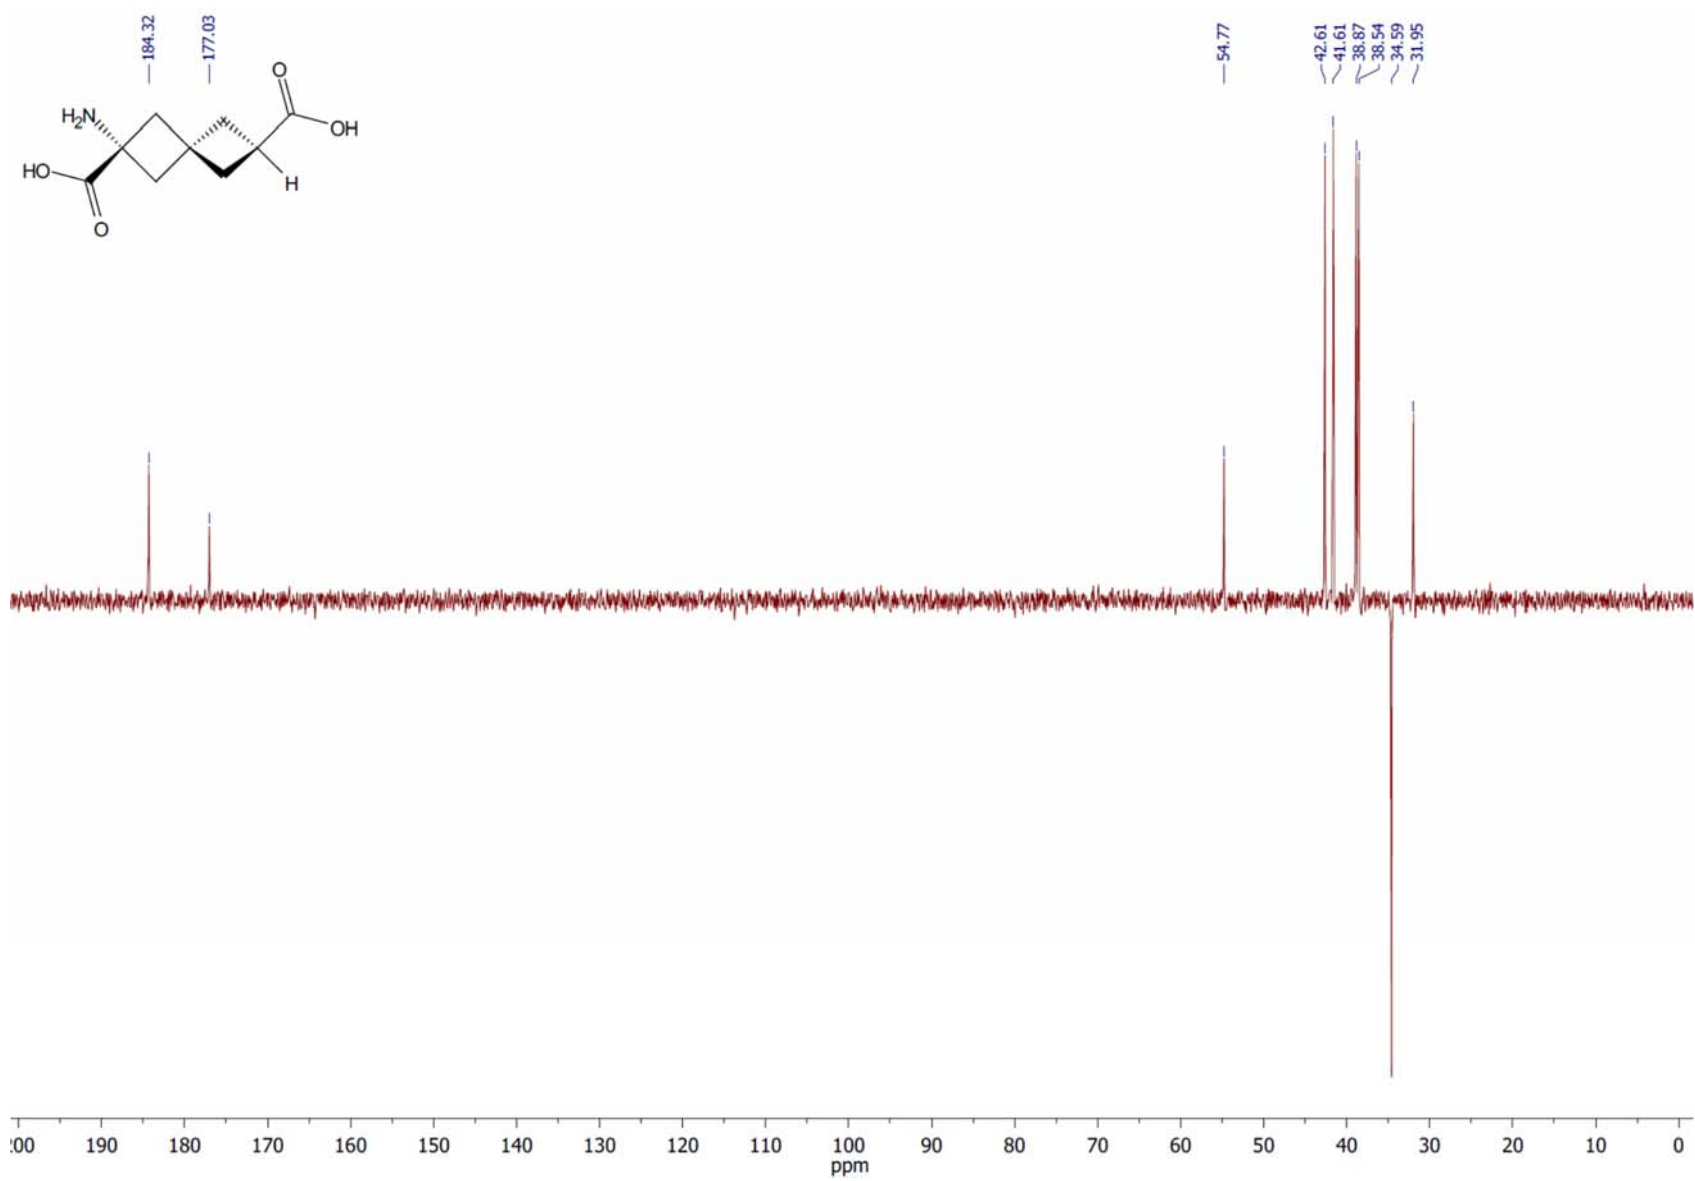

<sup>1</sup>H NMR spectrum of compound **14b**

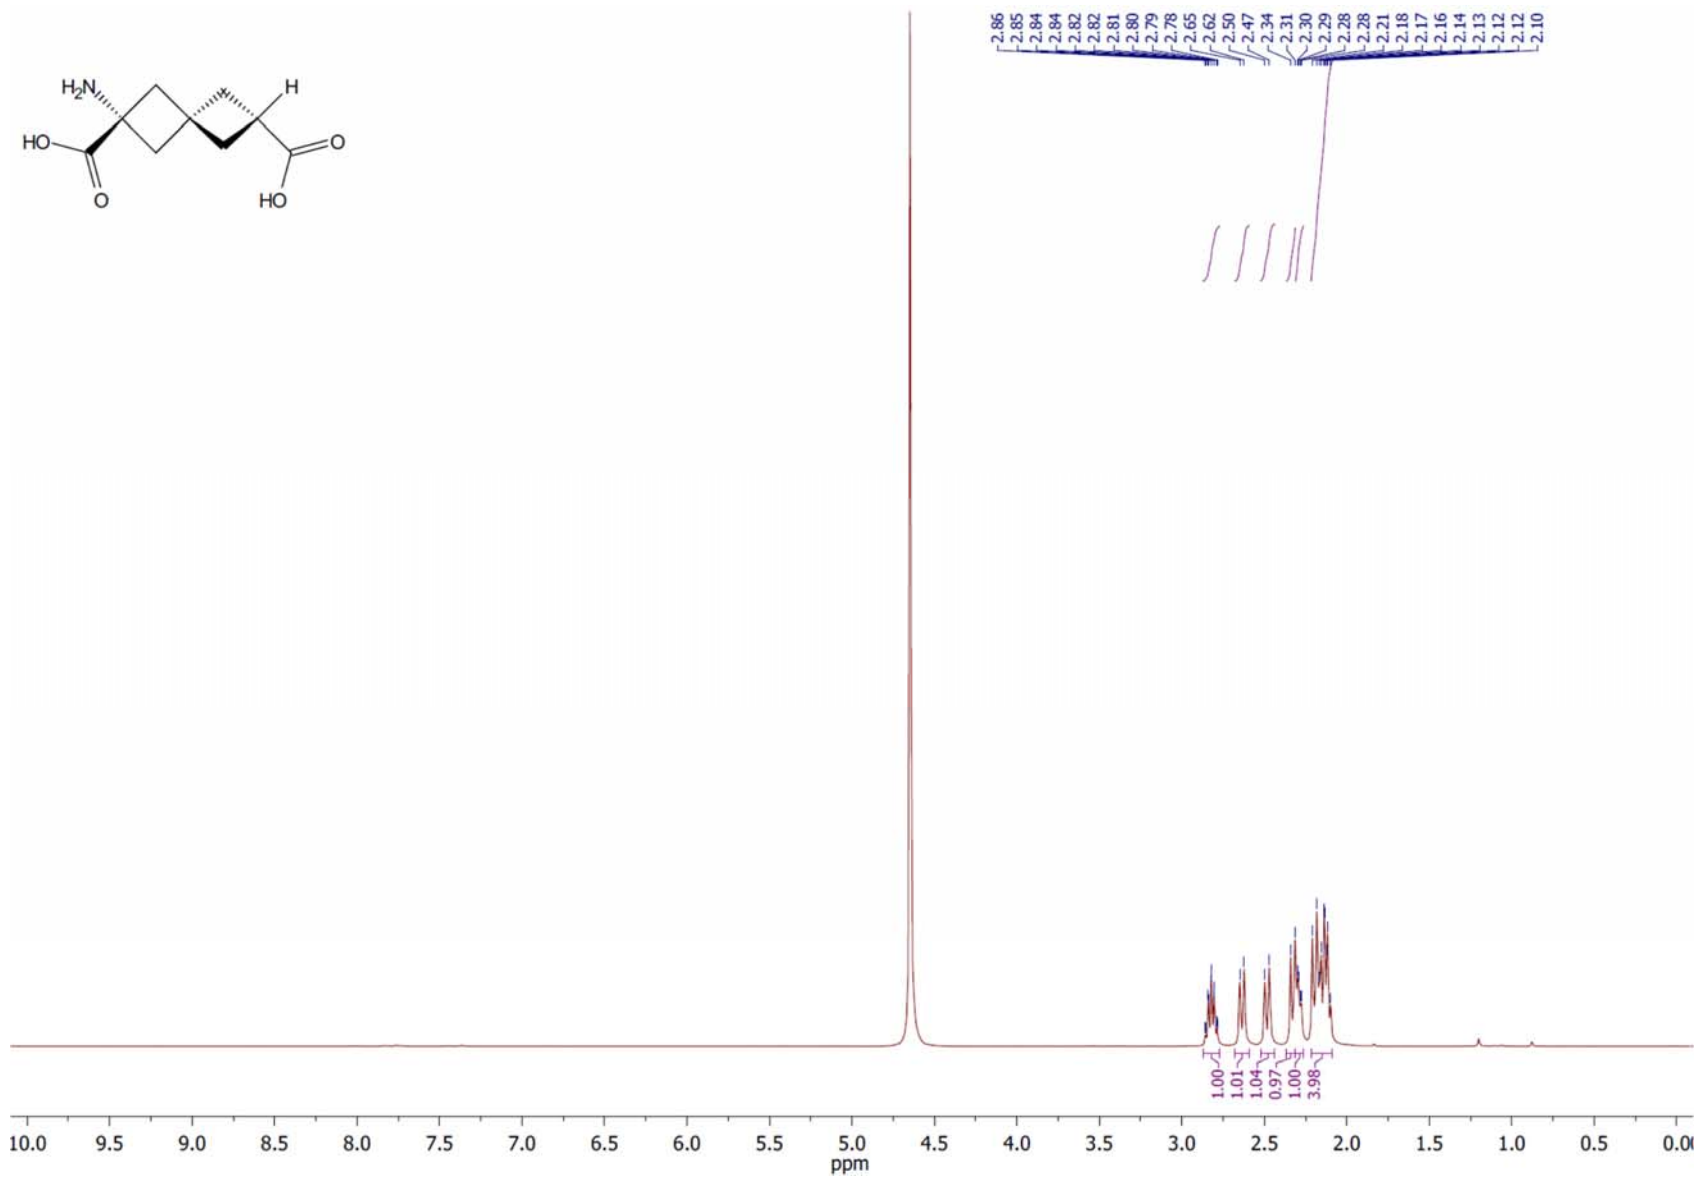

APT  $^{13}\text{C}\{^1\text{H}\}$  NMR spectrum of compound **14b**

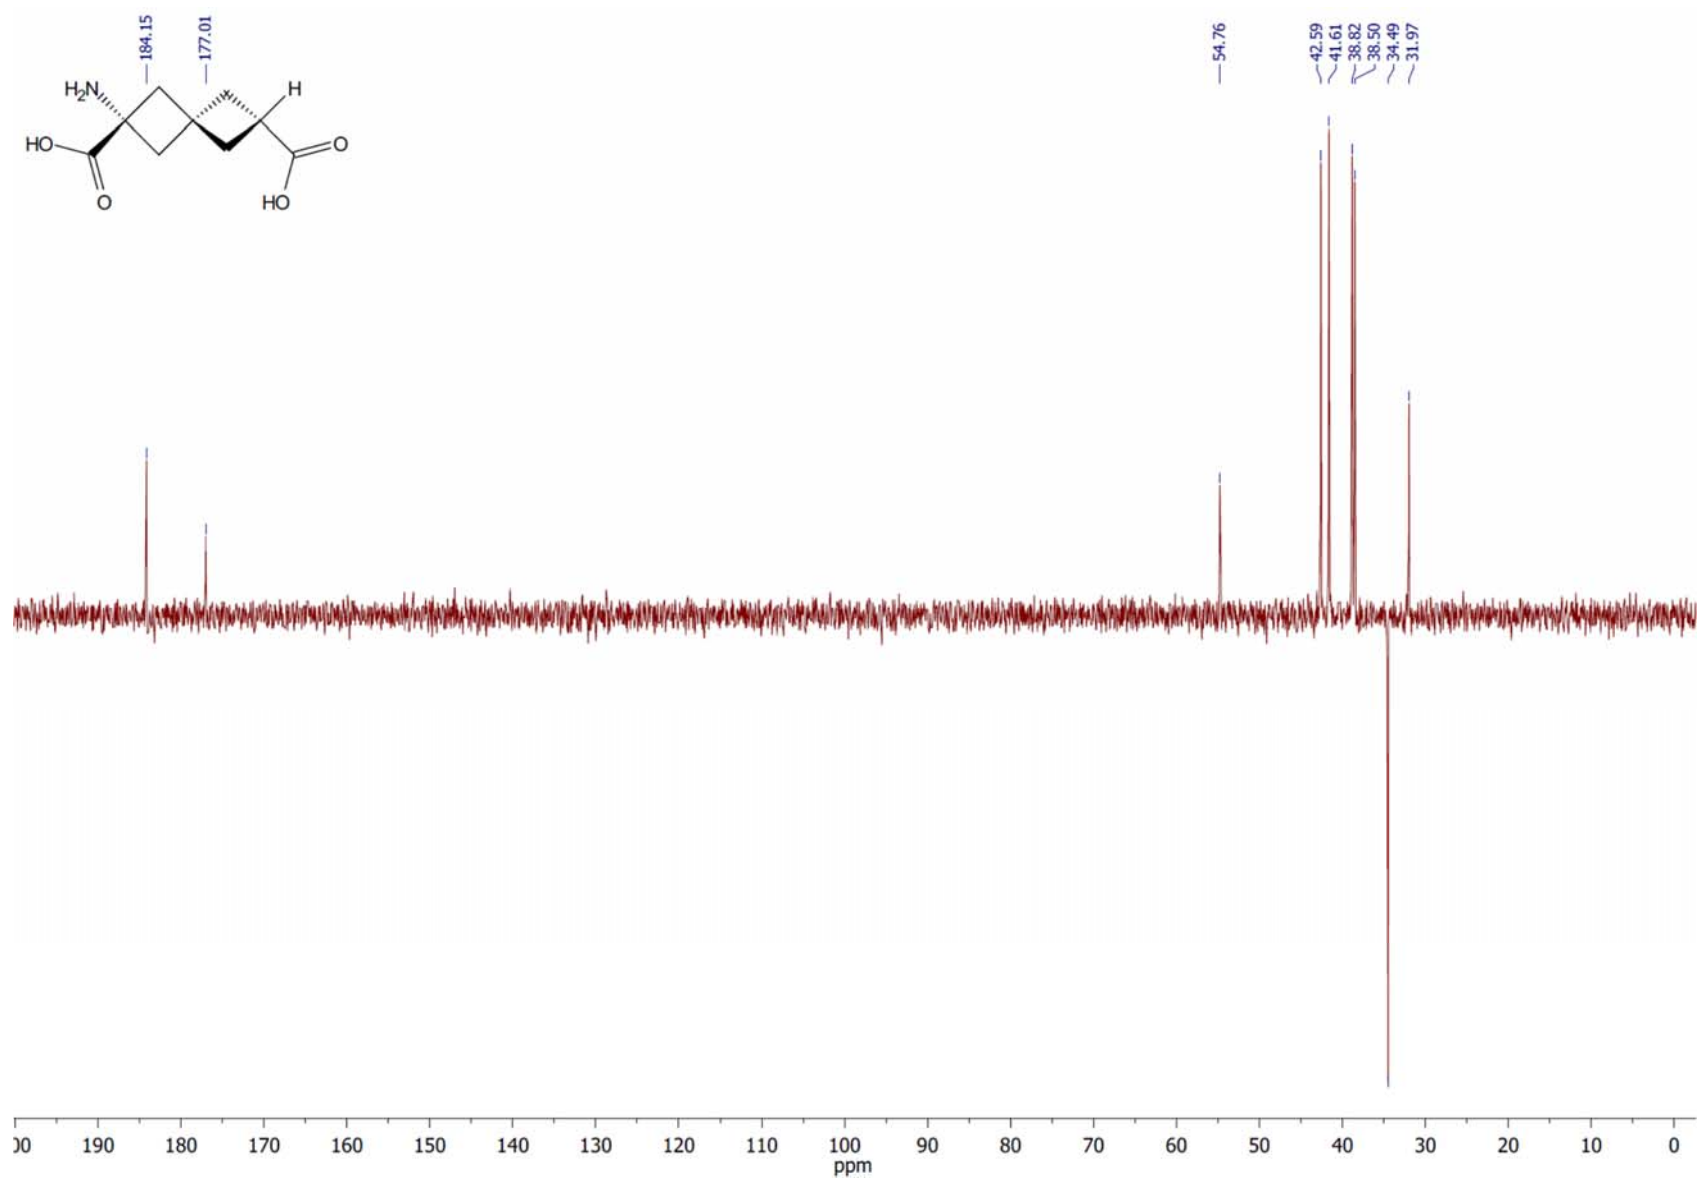

<sup>1</sup>H NMR spectrum of compound **17a**

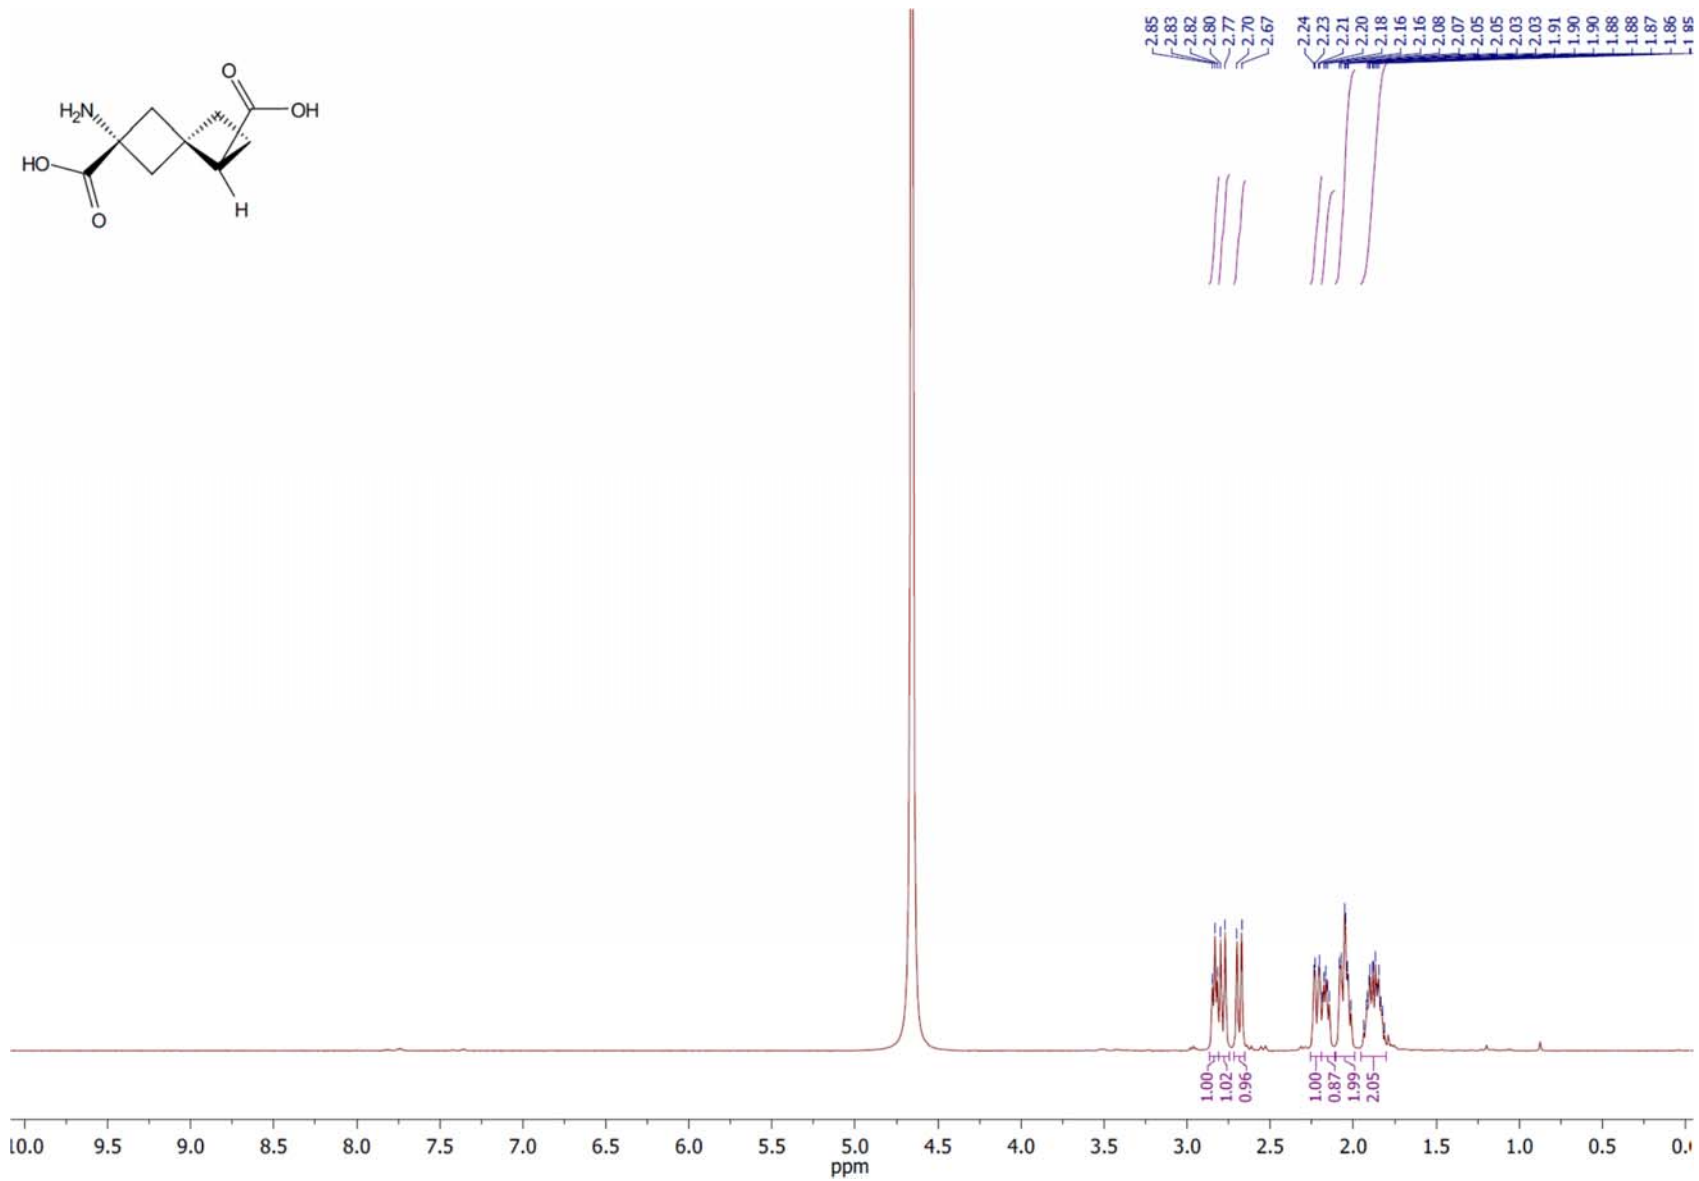



APT  $^{13}\text{C}\{^1\text{H}\}$  NMR spectrum of compound **17a**

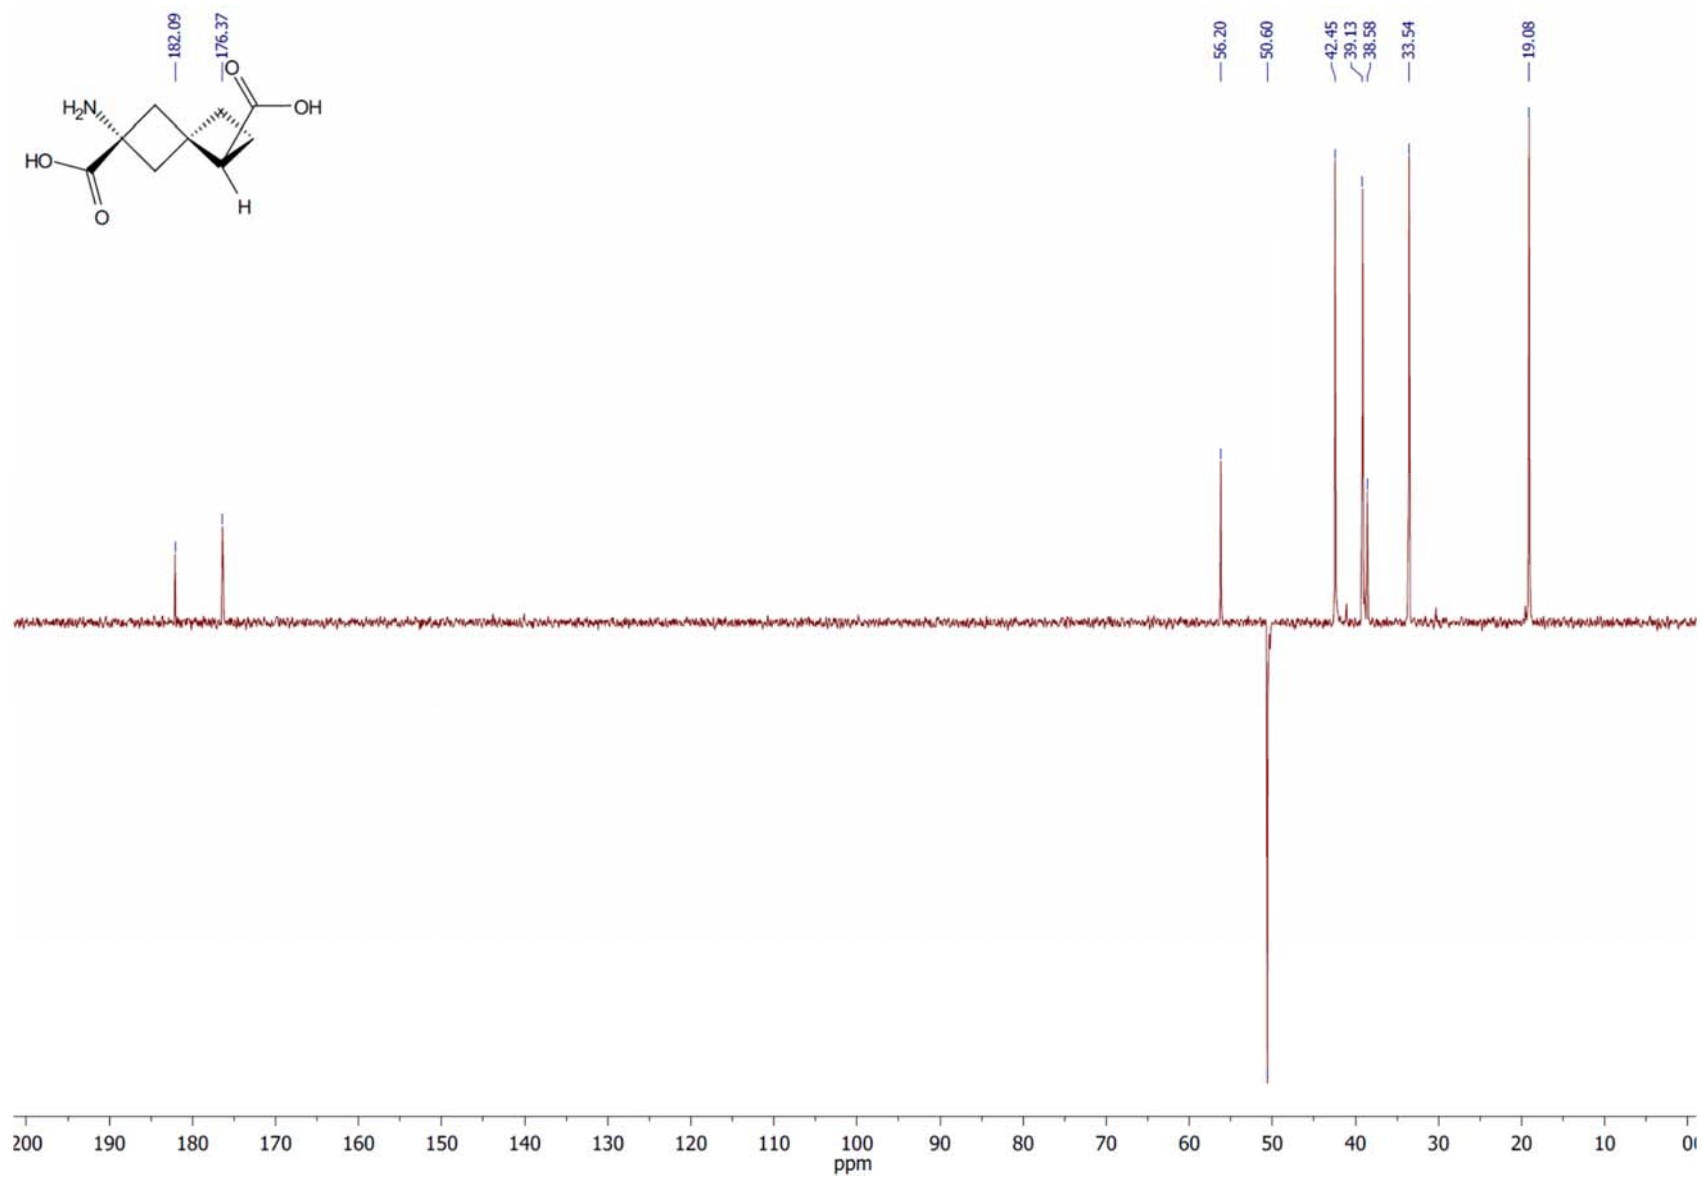

$^1\text{H}$  NMR spectrum of compound **17b**

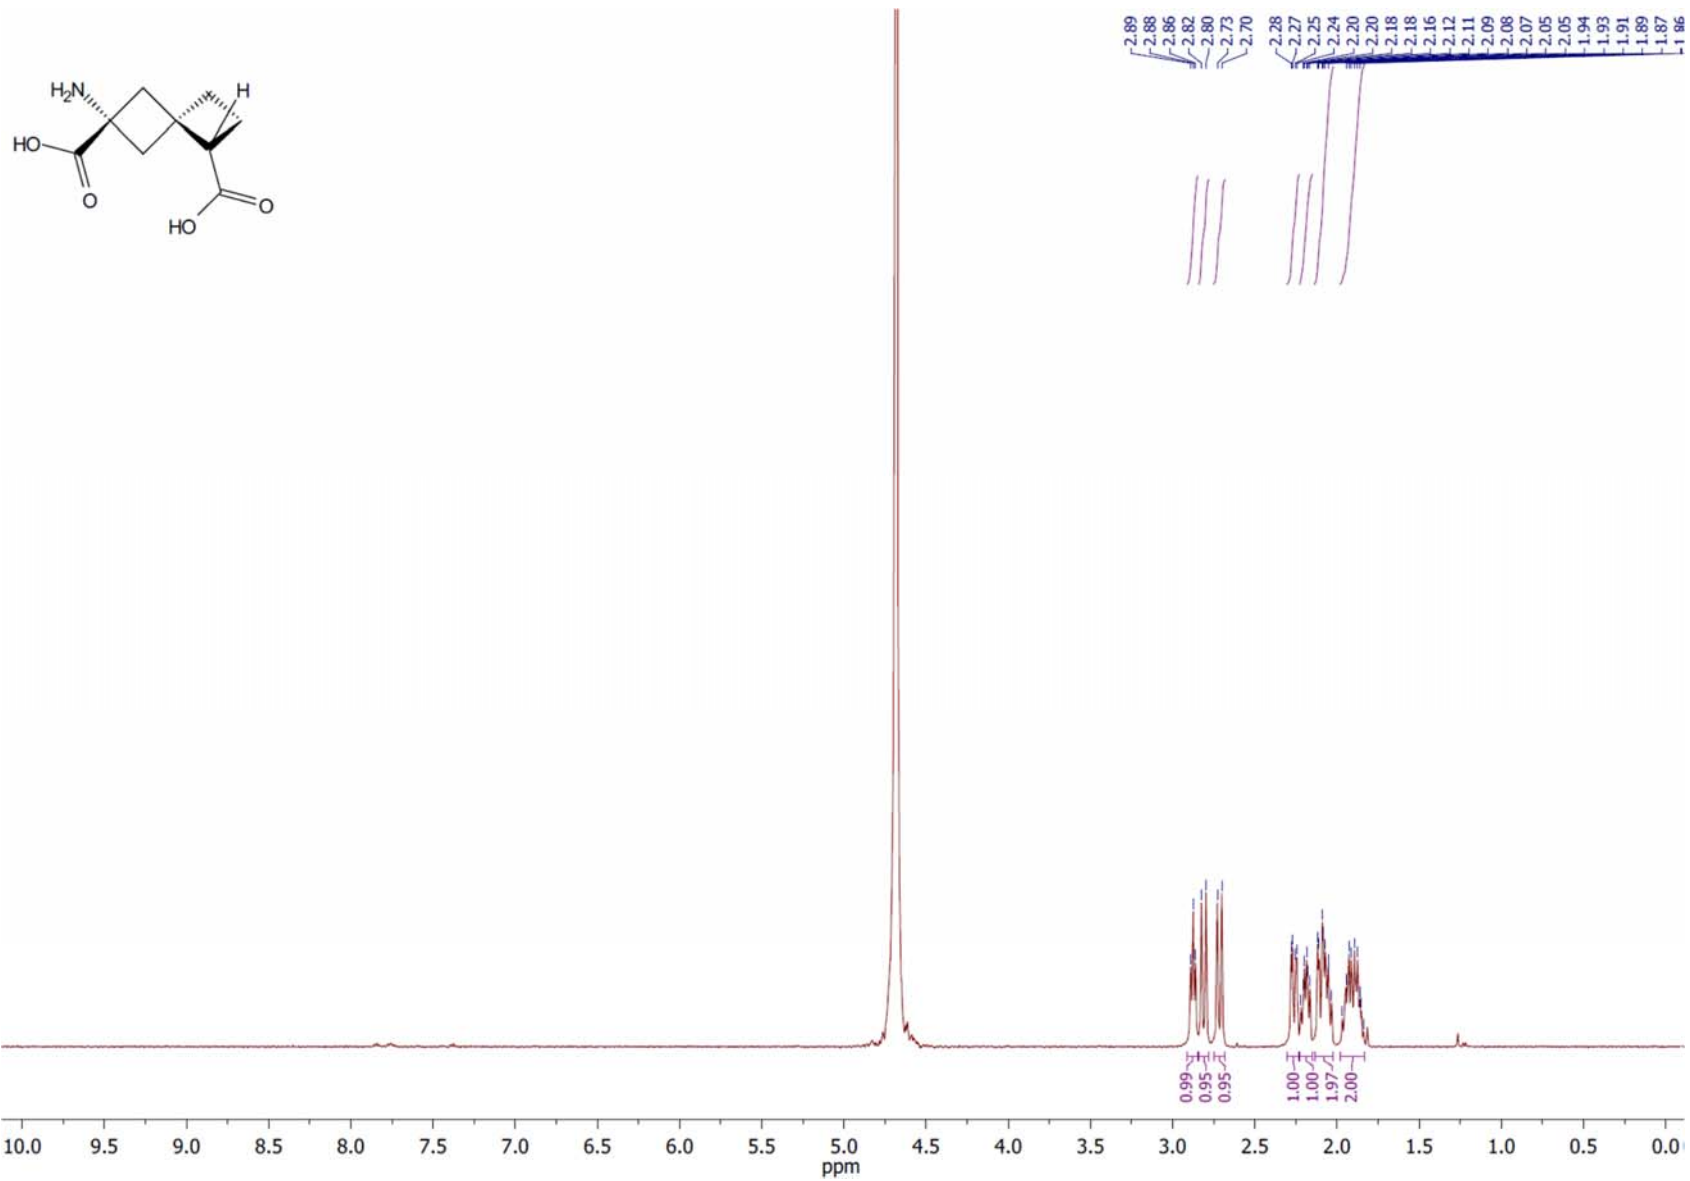

APT  $^{13}\text{C}\{^1\text{H}\}$  NMR spectrum of compound **17b**

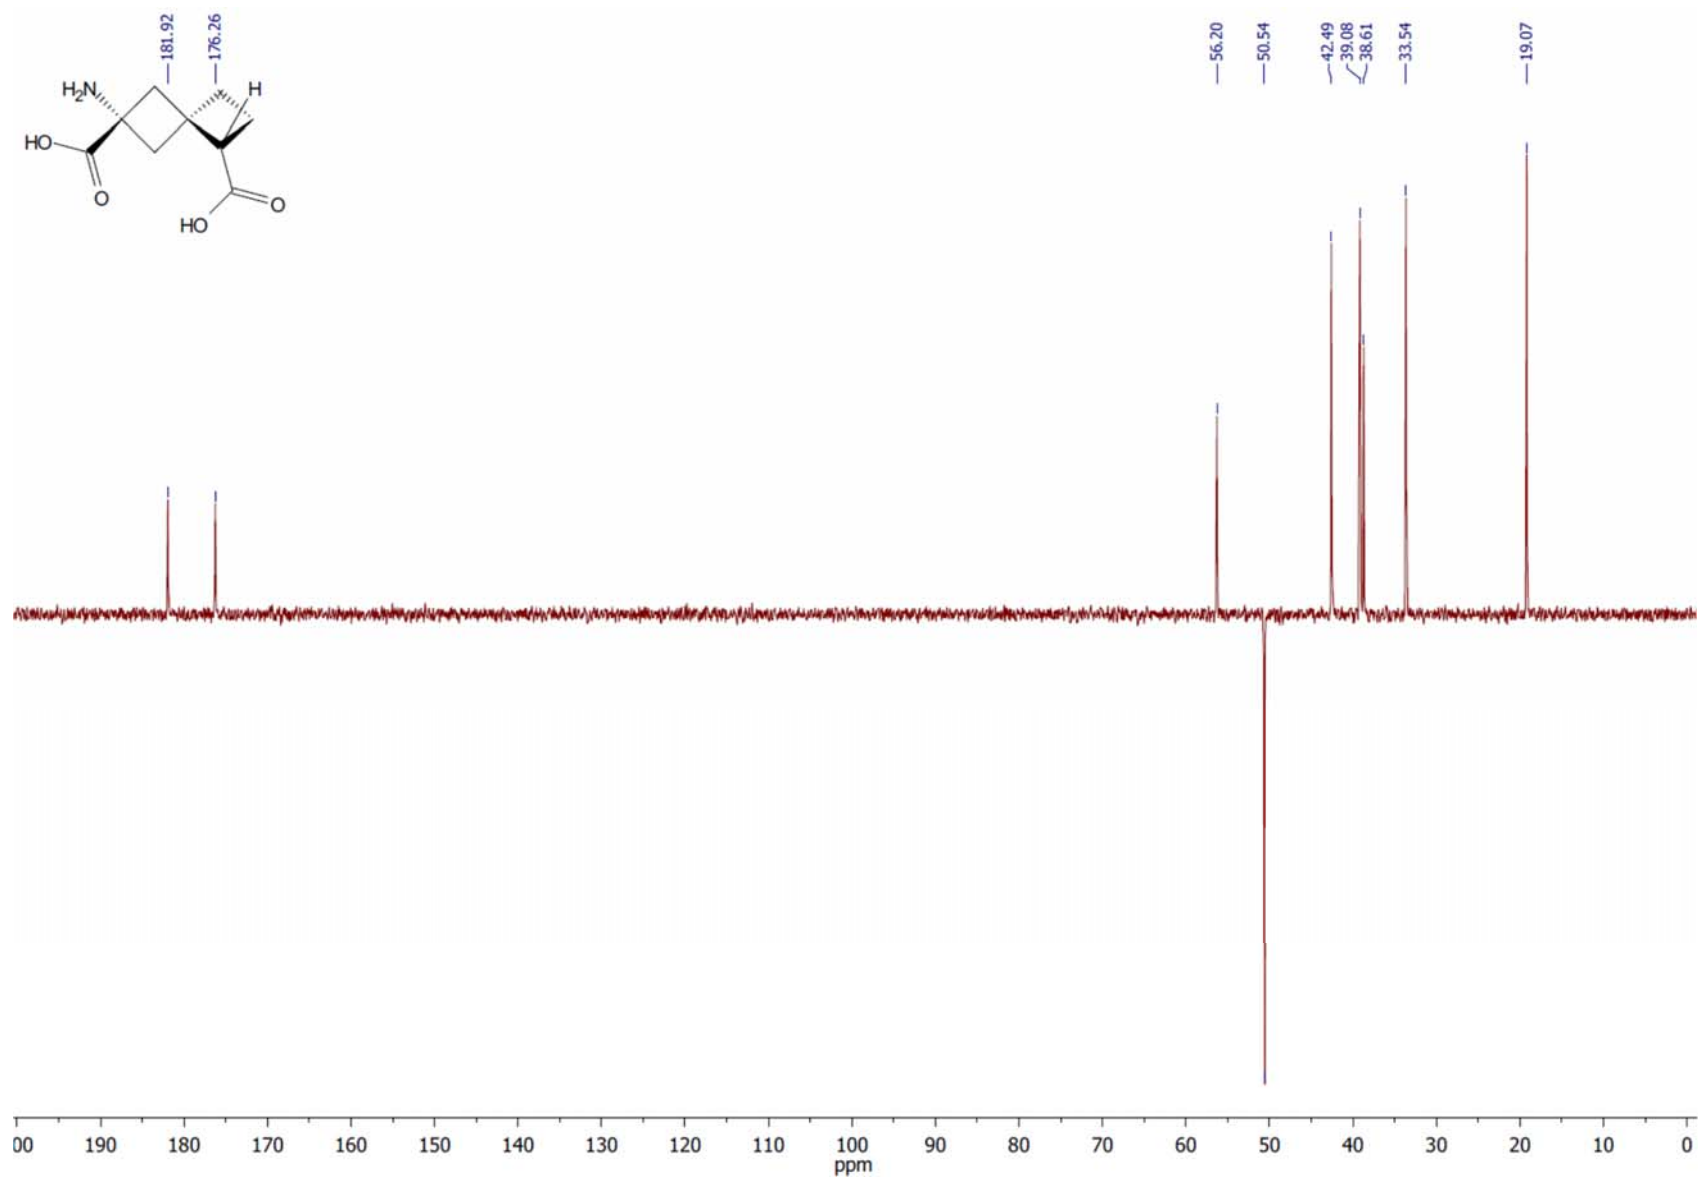

<sup>1</sup>H NMR spectrum of compound **18a**

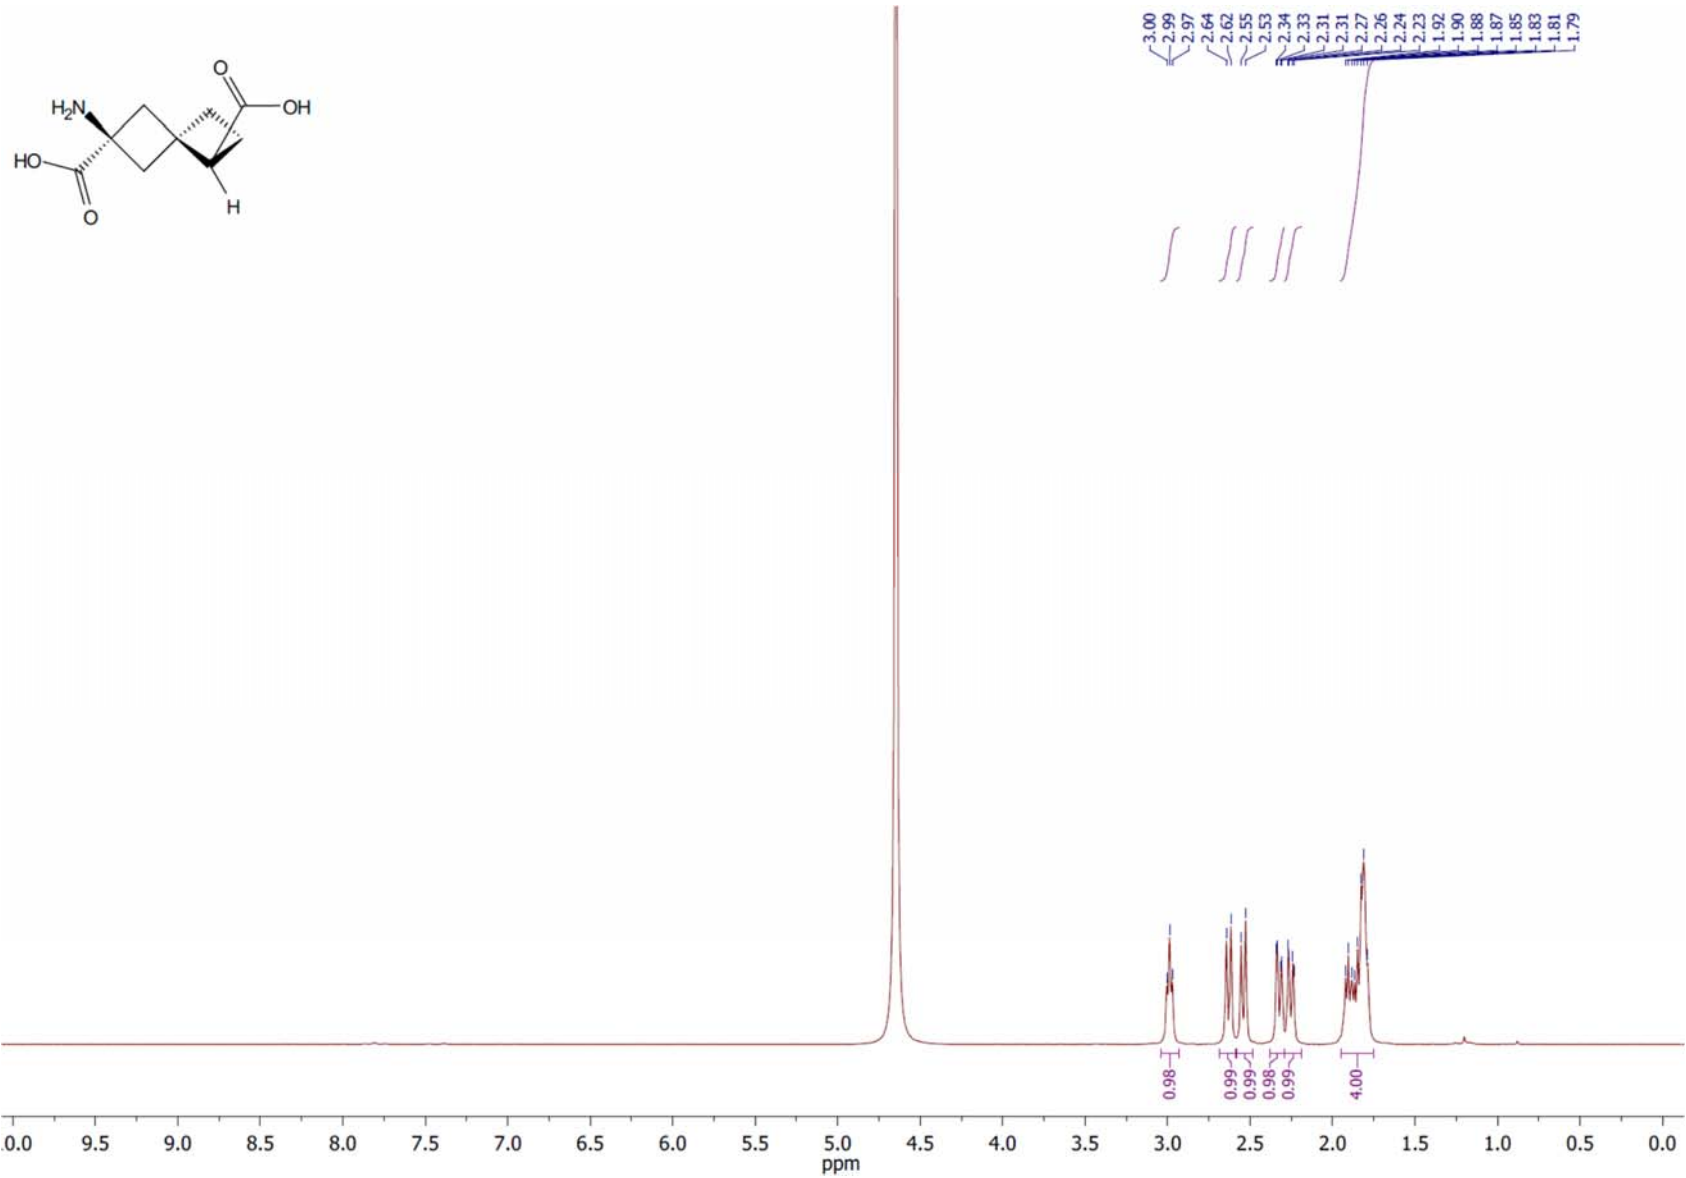

APT  $^{13}\text{C}\{^1\text{H}\}$  NMR spectrum of compound **18a**

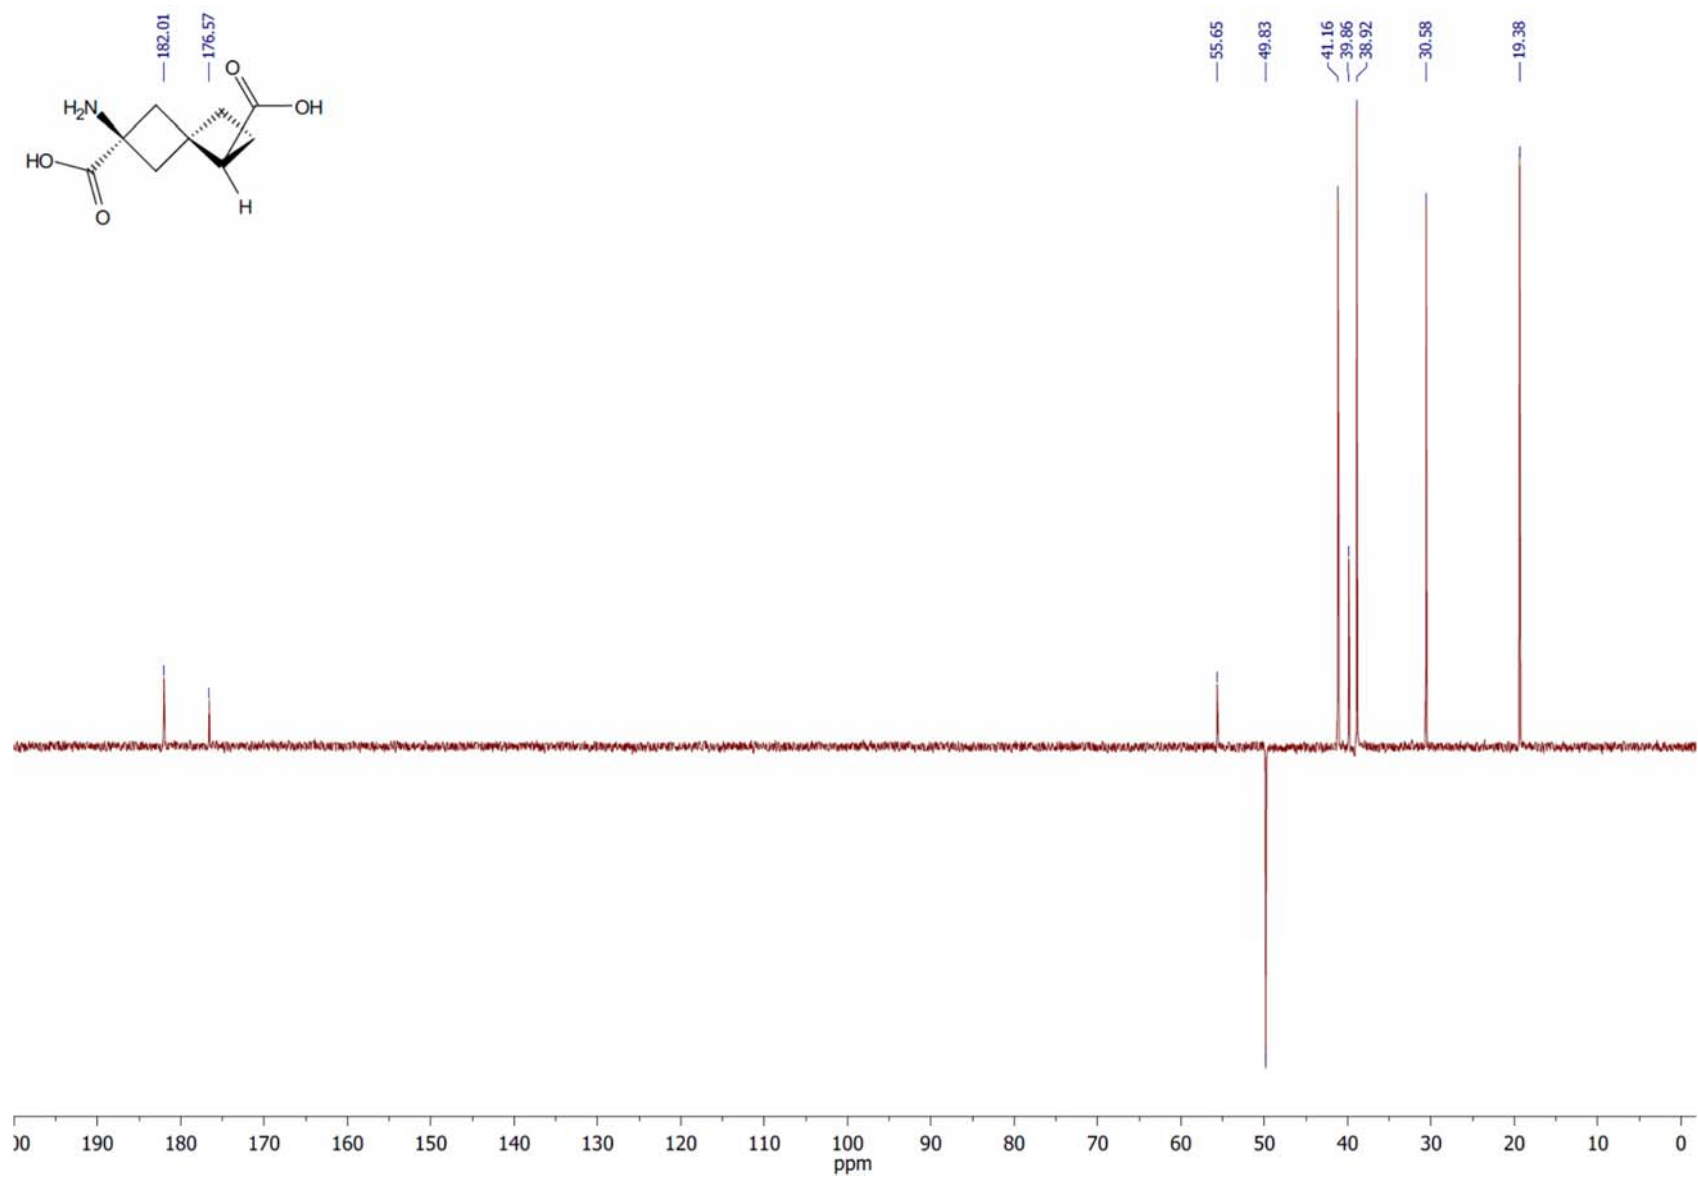

<sup>1</sup>H NMR spectrum of compound **18b**

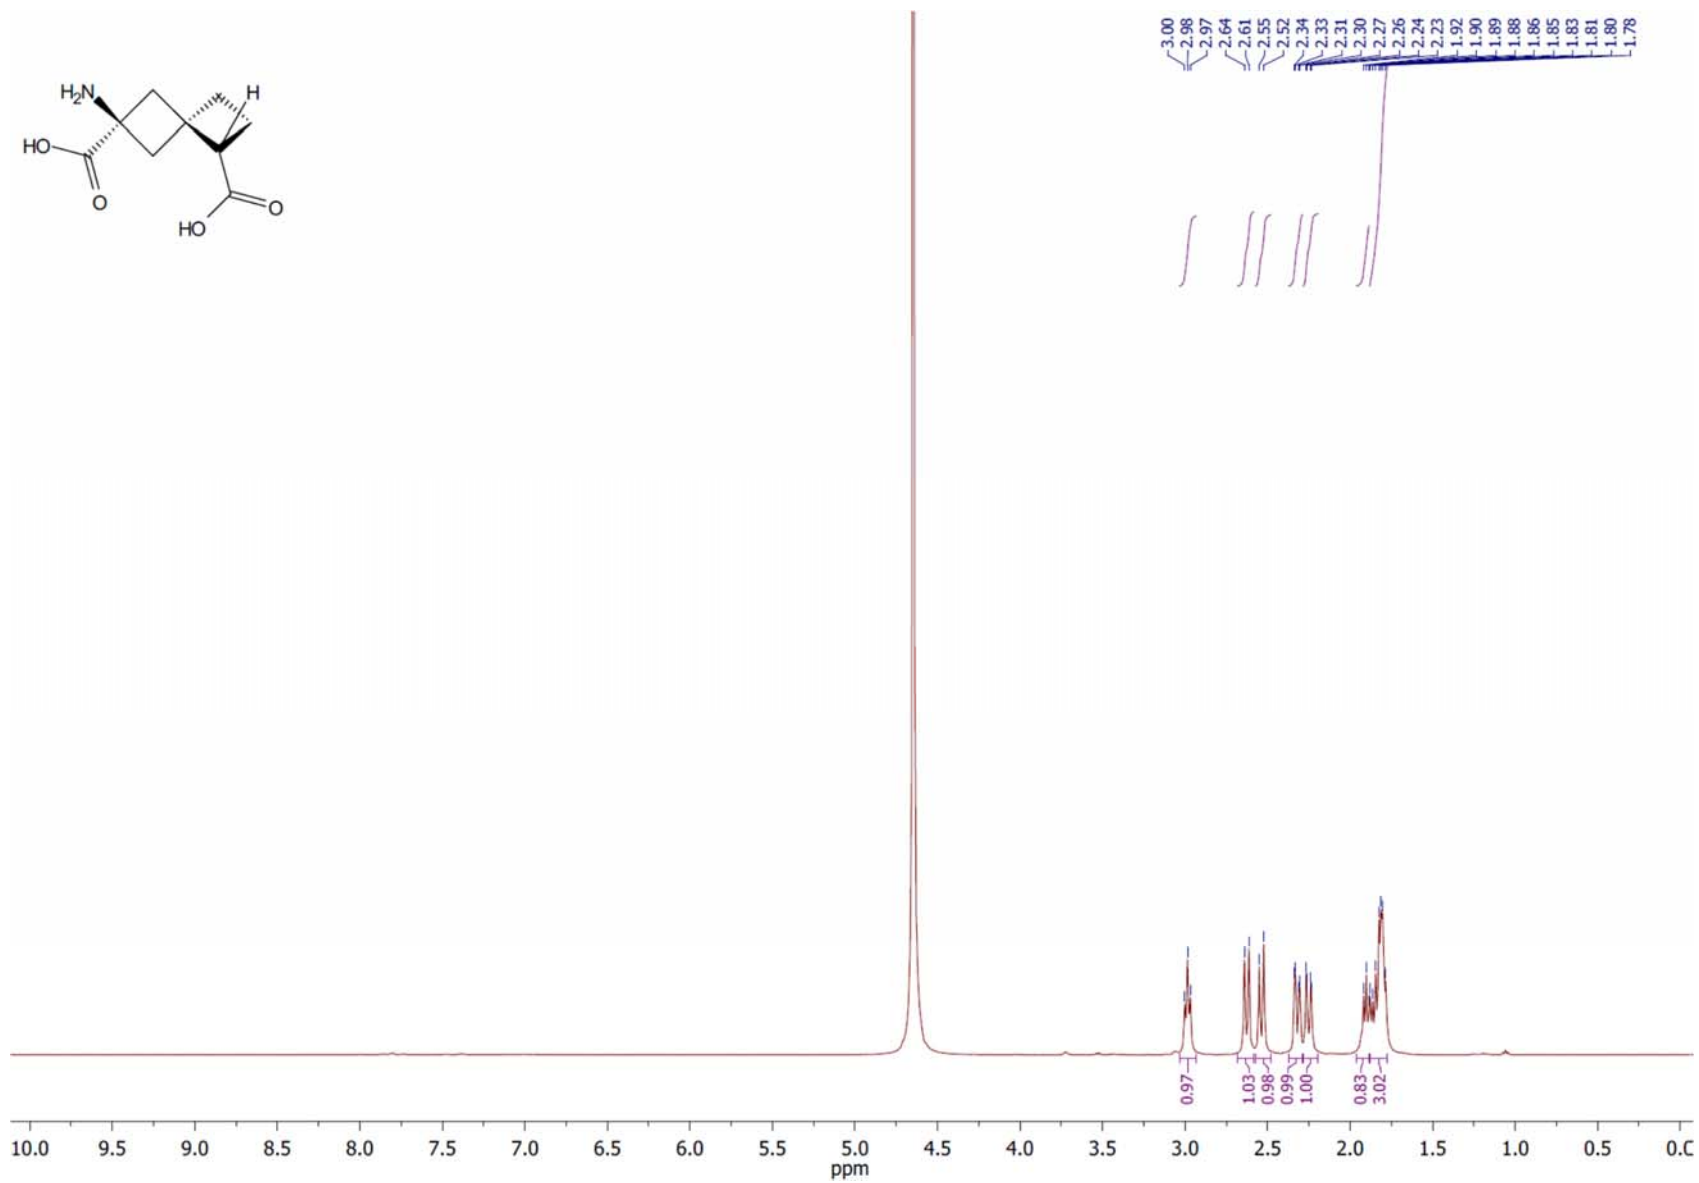

APT  $^{13}\text{C}\{^1\text{H}\}$  NMR spectrum of compound **18b**

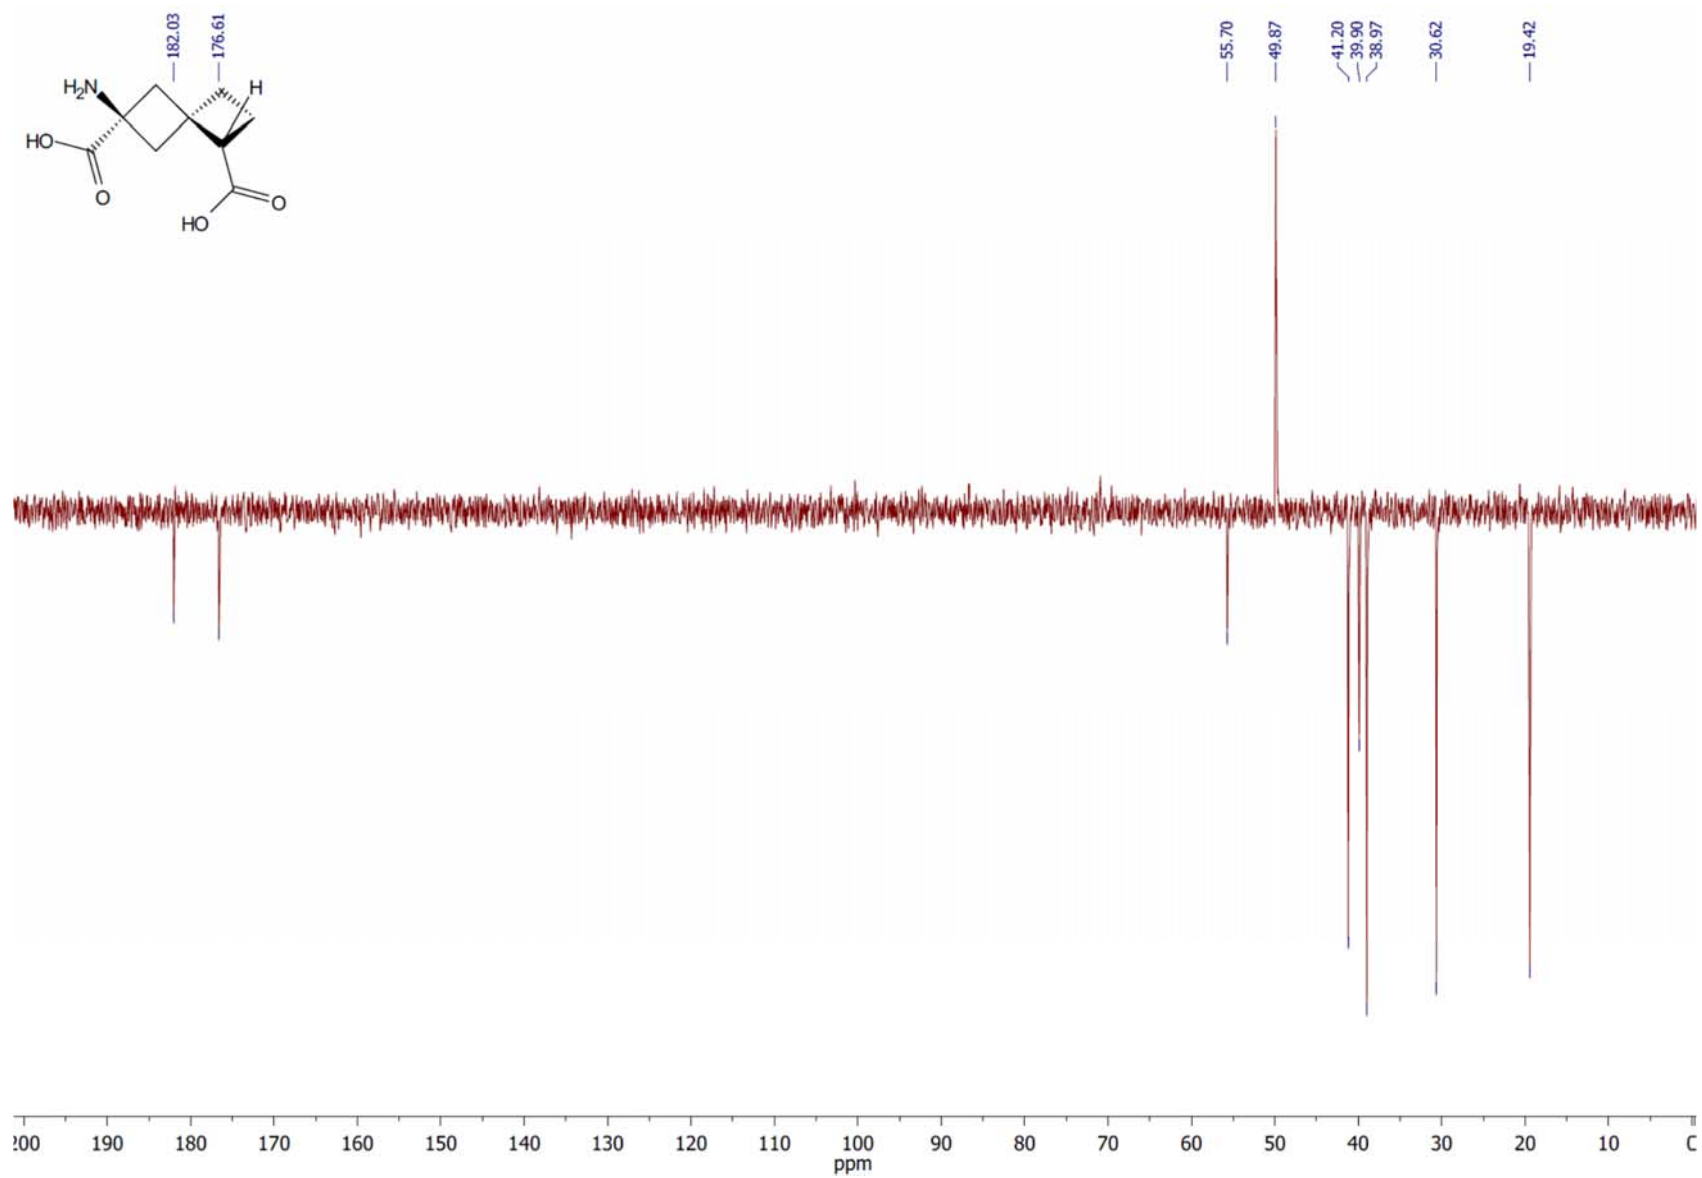

<sup>1</sup>H NMR spectrum of compound **19a**

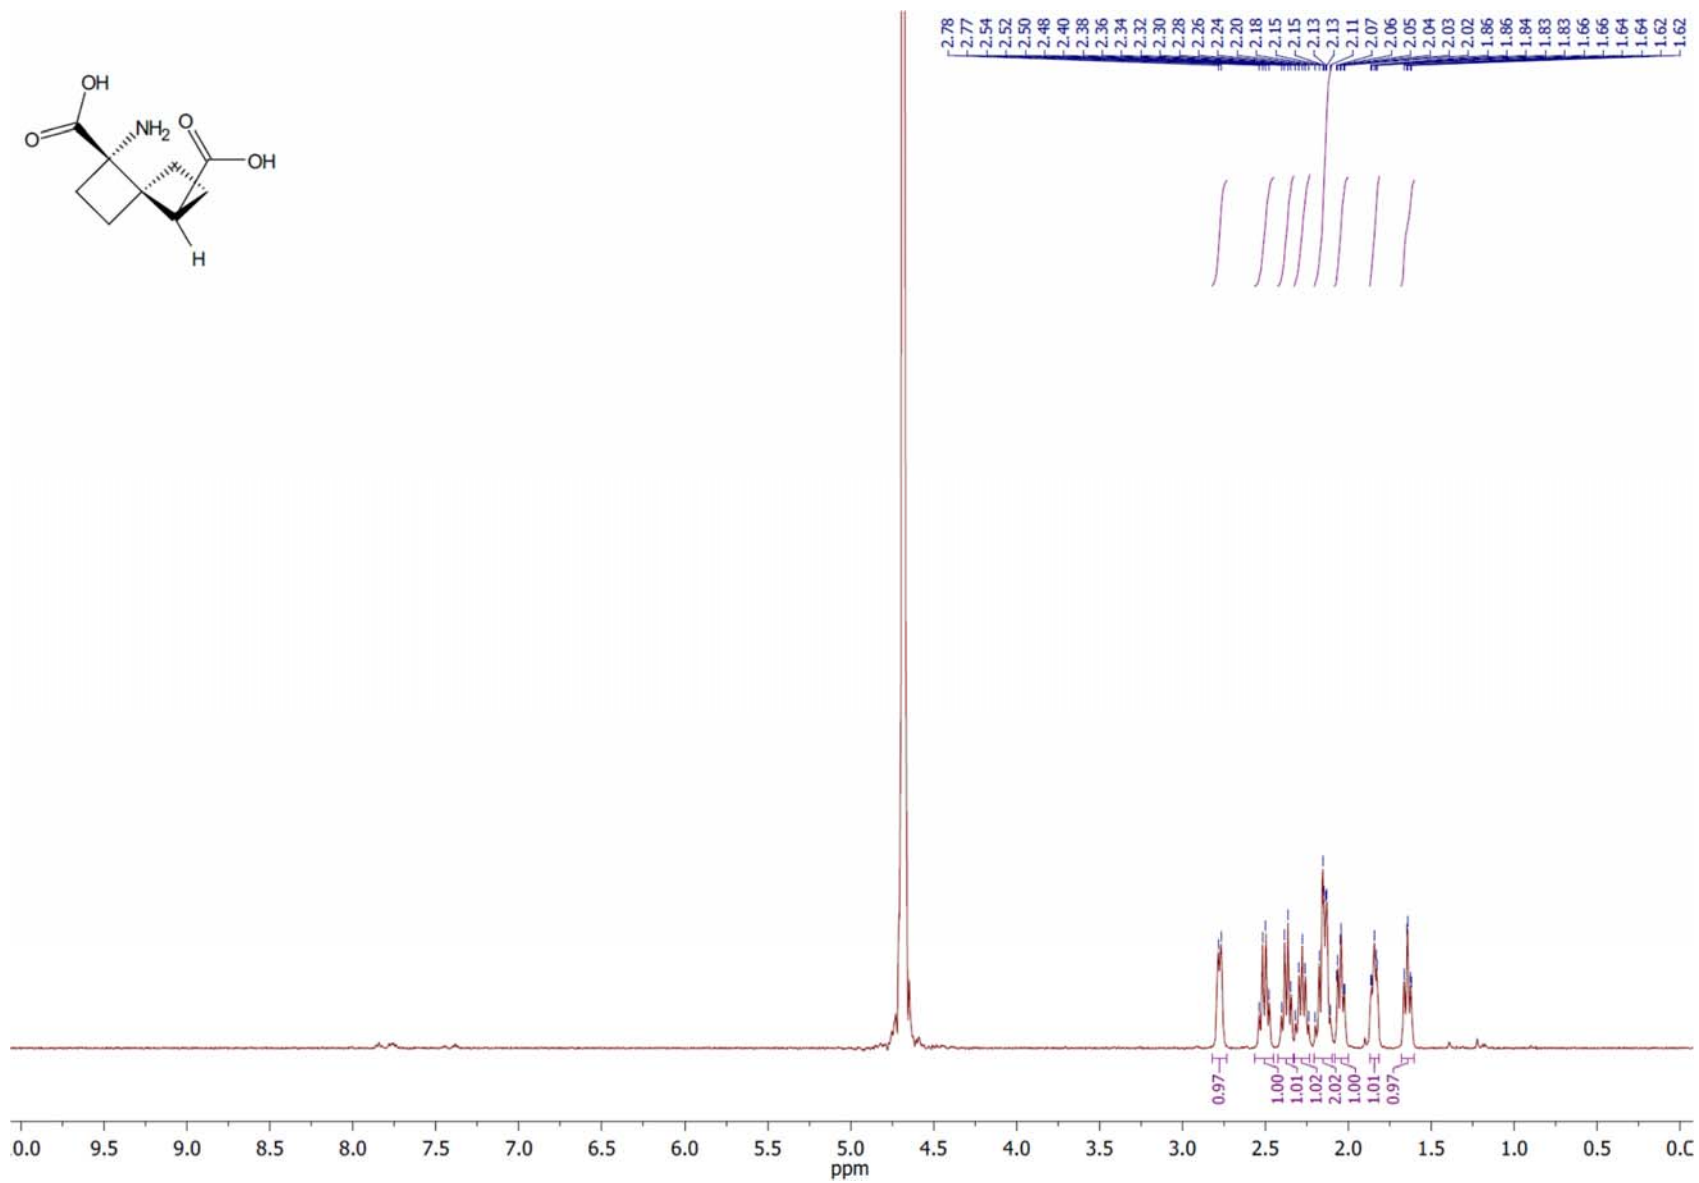



APT  $^{13}\text{C}\{^1\text{H}\}$  NMR spectrum of compound **19a**

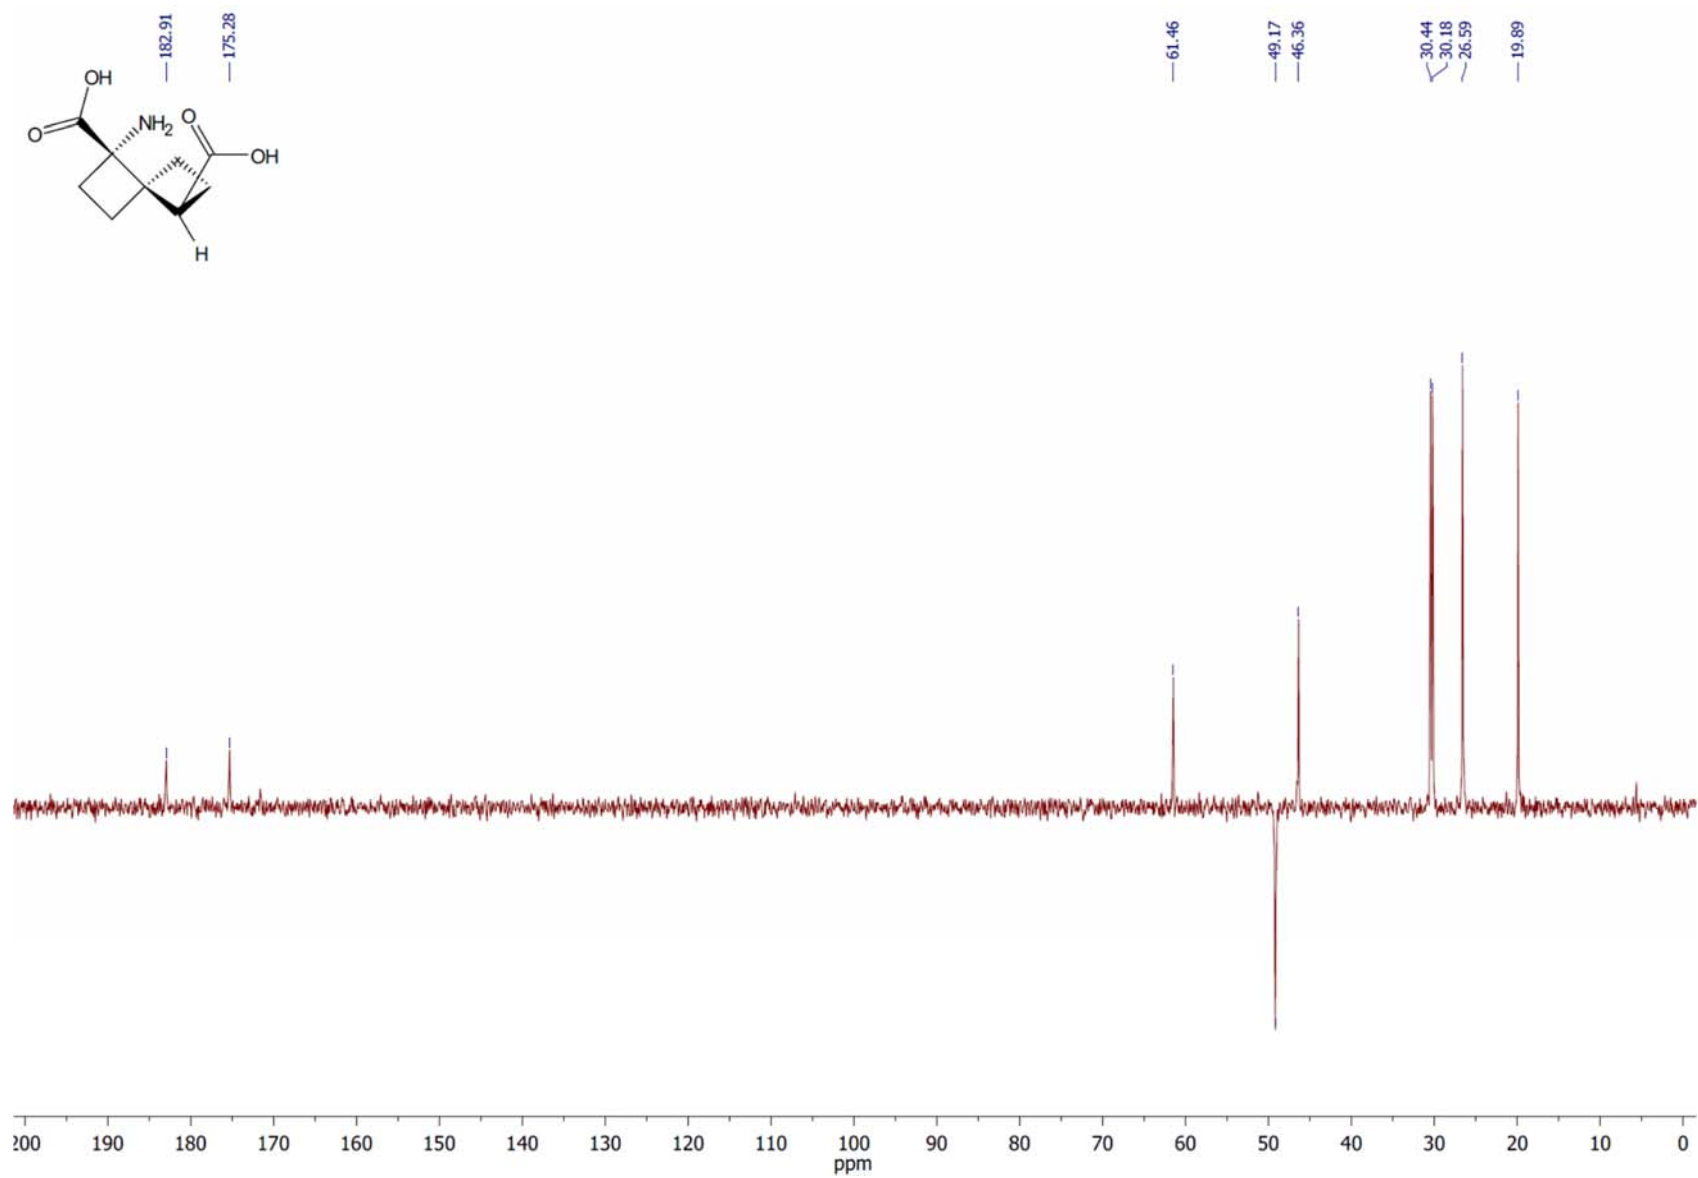

<sup>1</sup>H NMR spectrum of compound **19b**

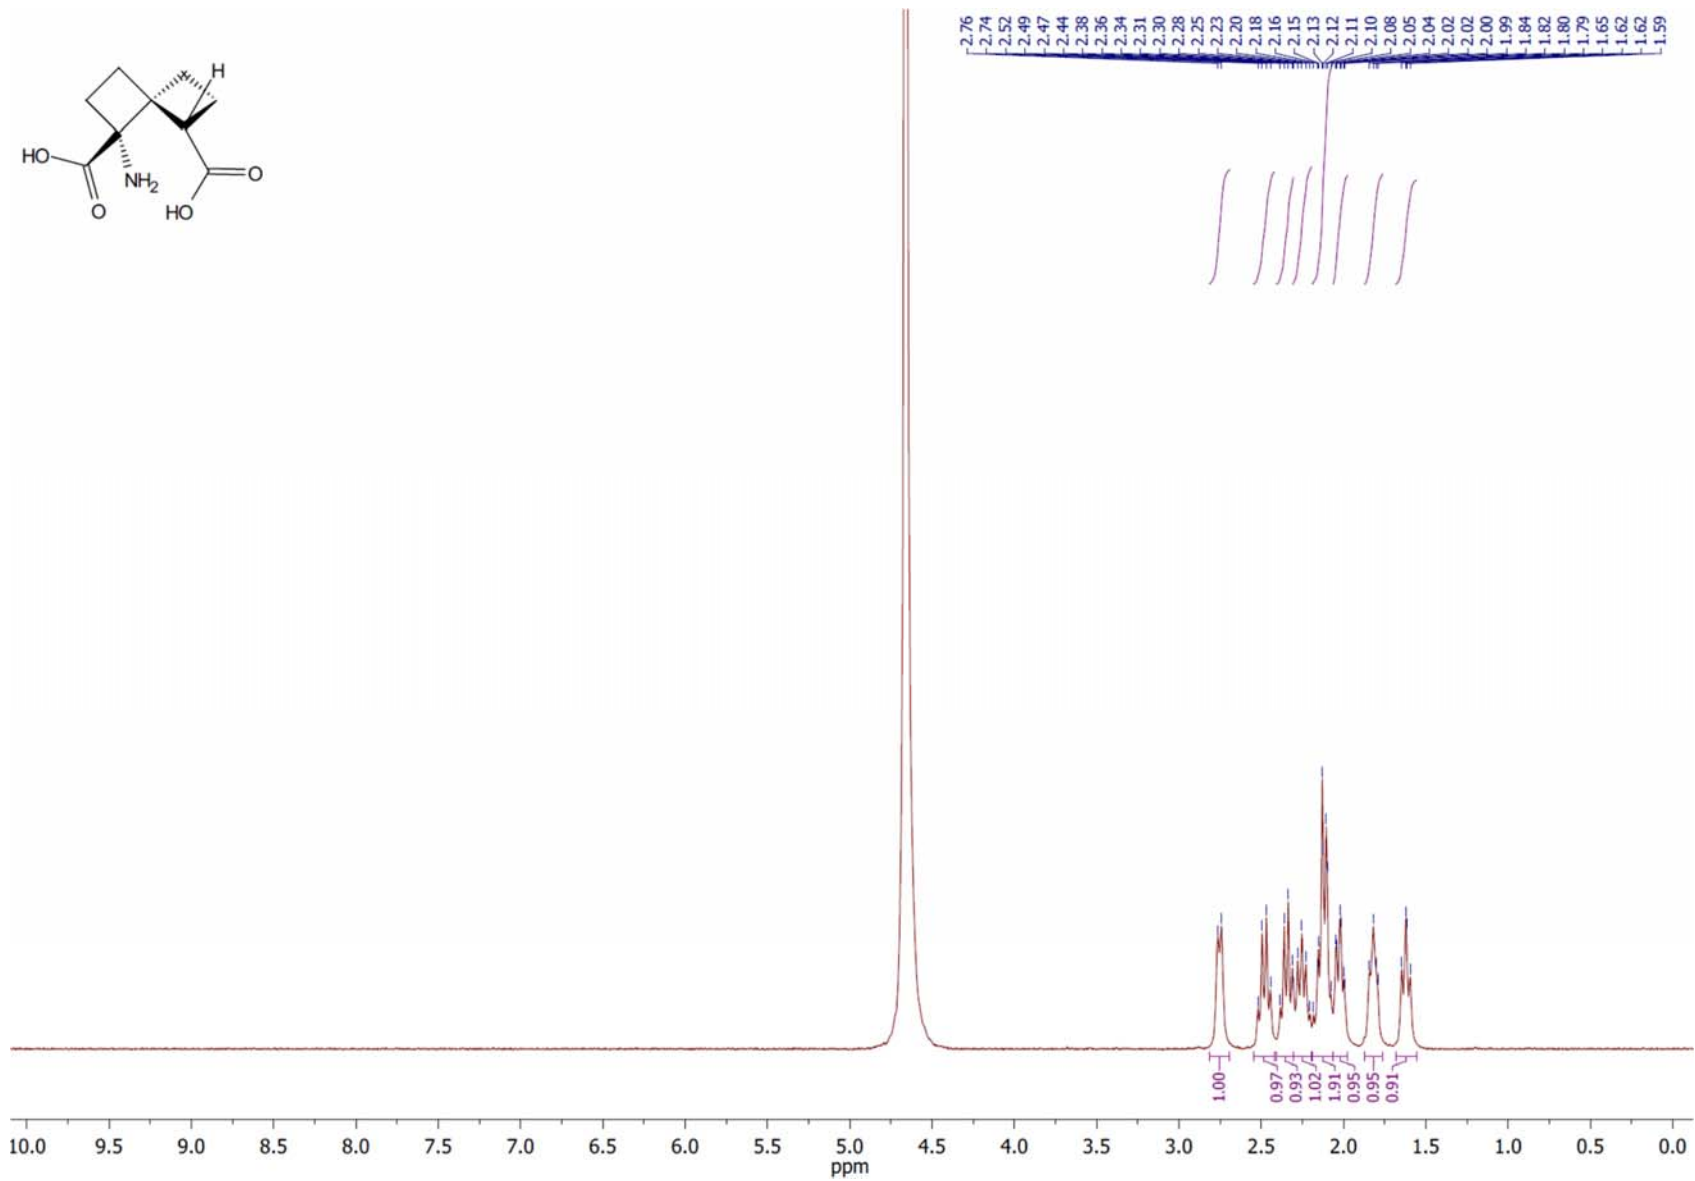

$^{13}\text{C}\{^1\text{H}\}$  NMR spectrum of compound **19b**

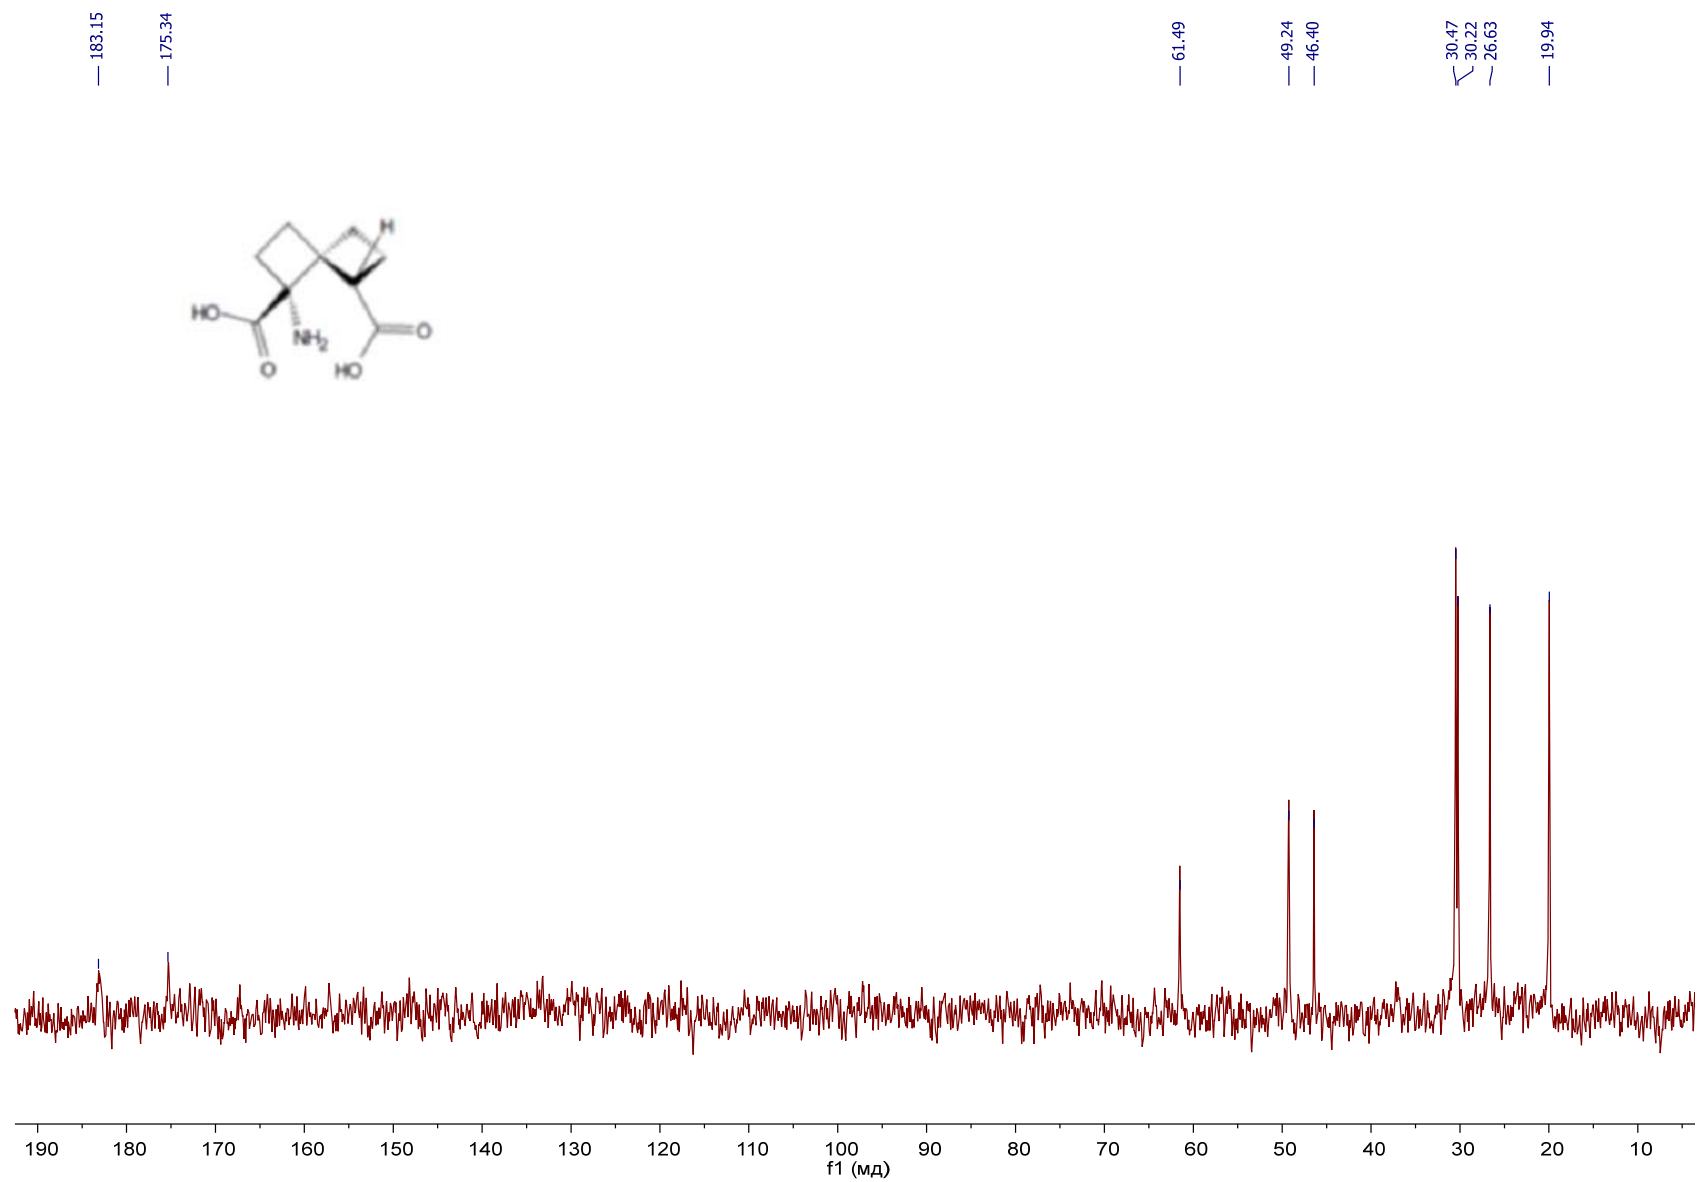

<sup>1</sup>H NMR spectrum of compound **21a**

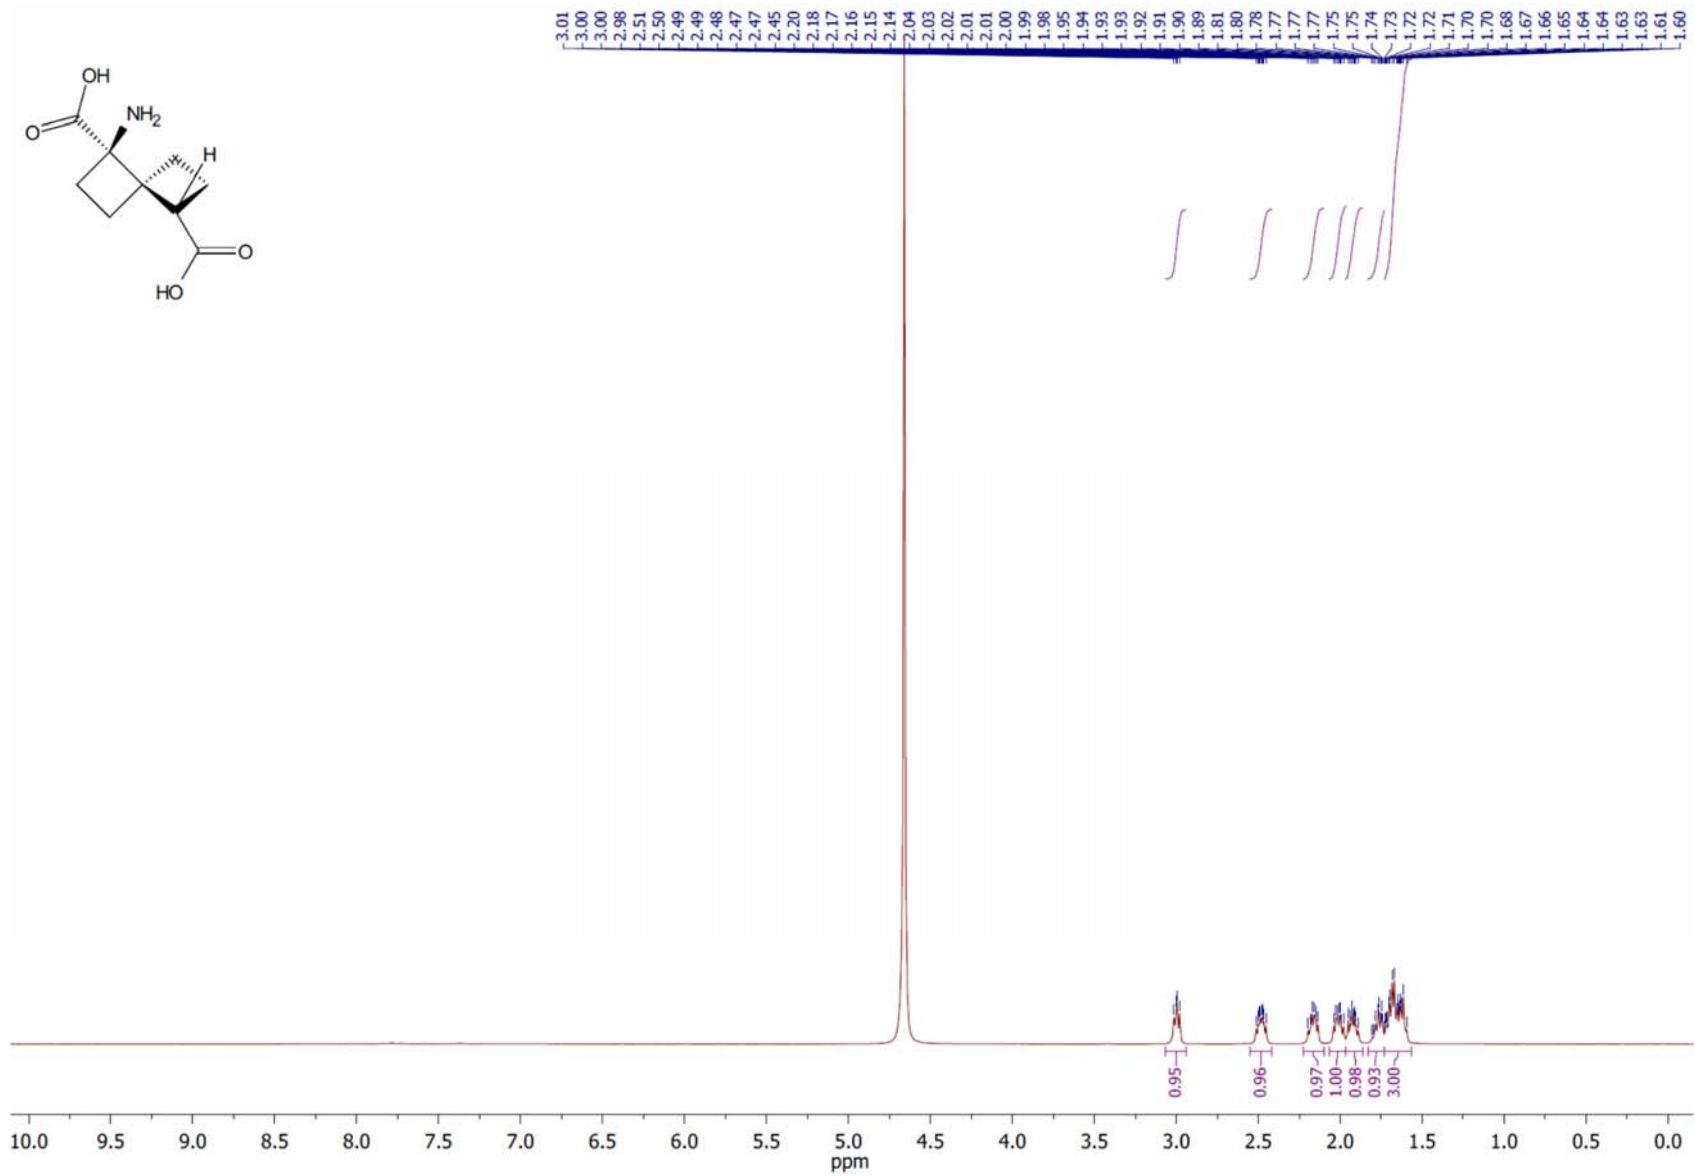

APT  $^{13}\text{C}\{^1\text{H}\}$  NMR spectrum of compound **21a**

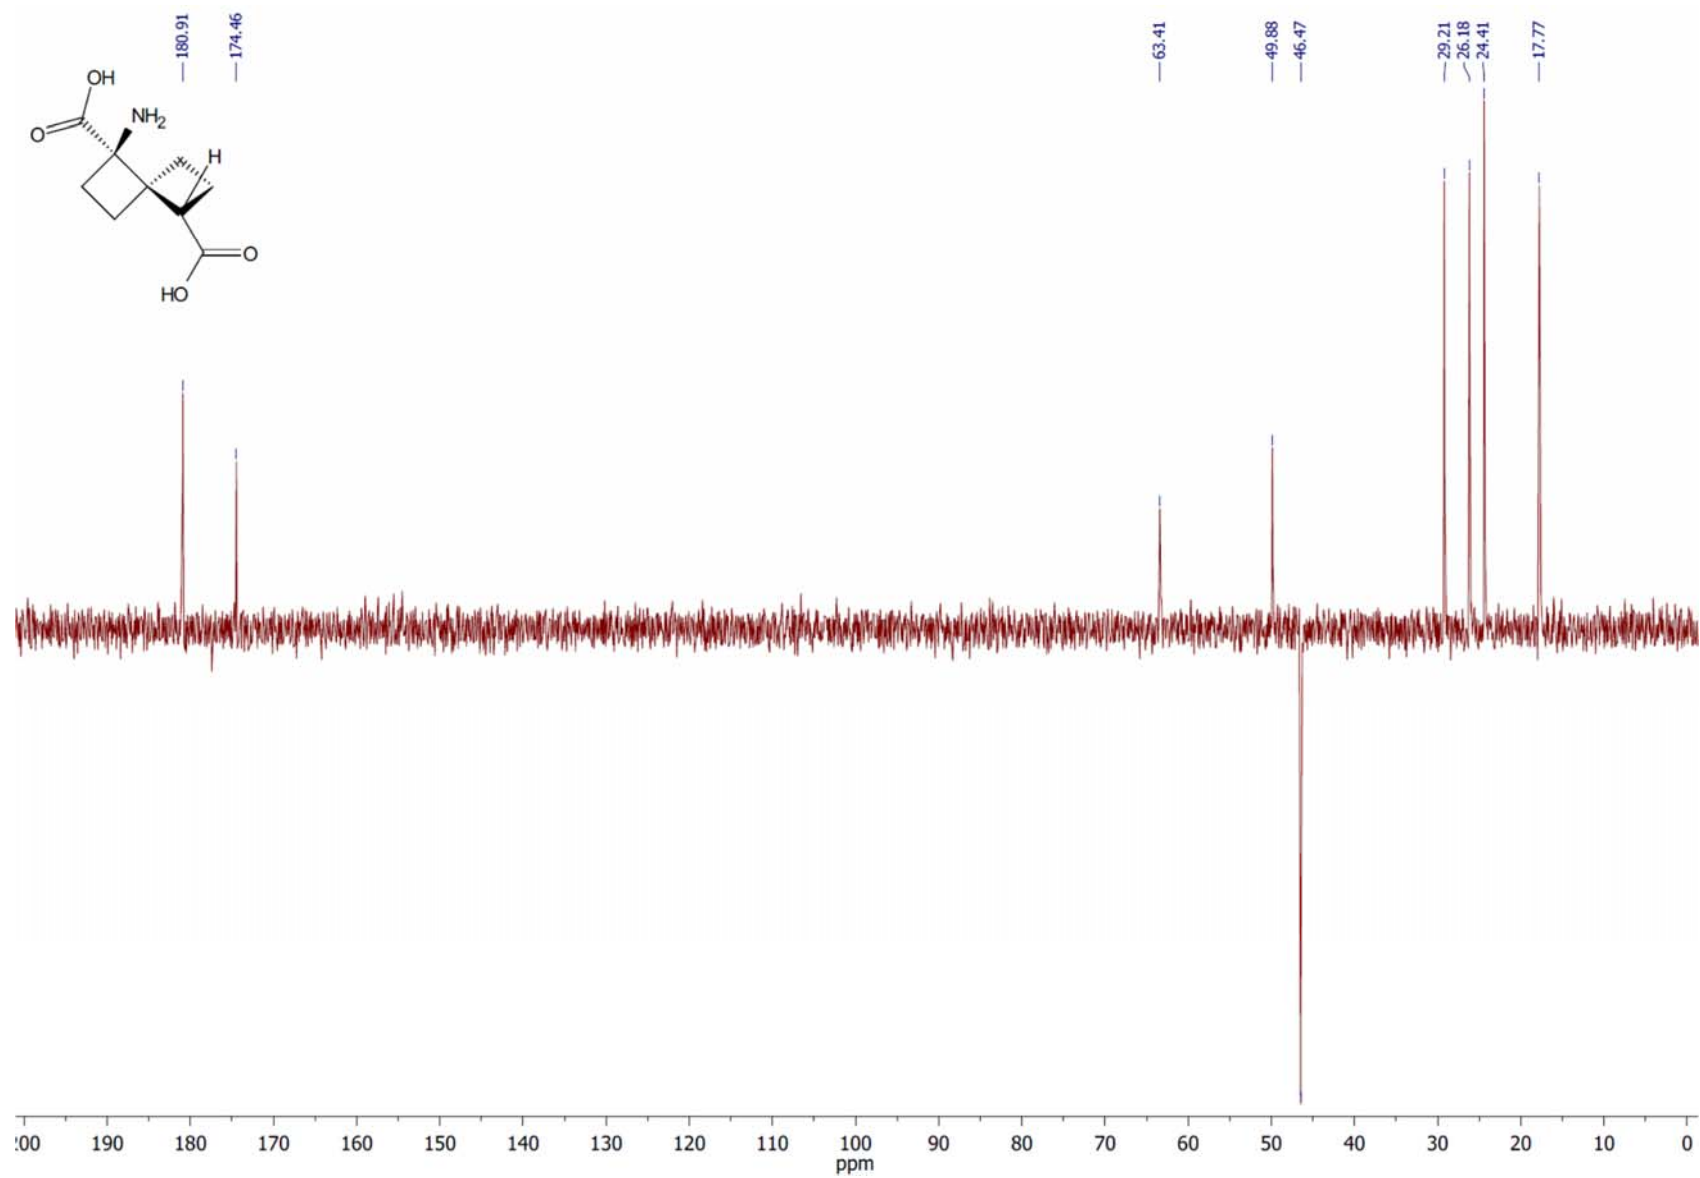

<sup>1</sup>H NMR spectrum of compound **21b**

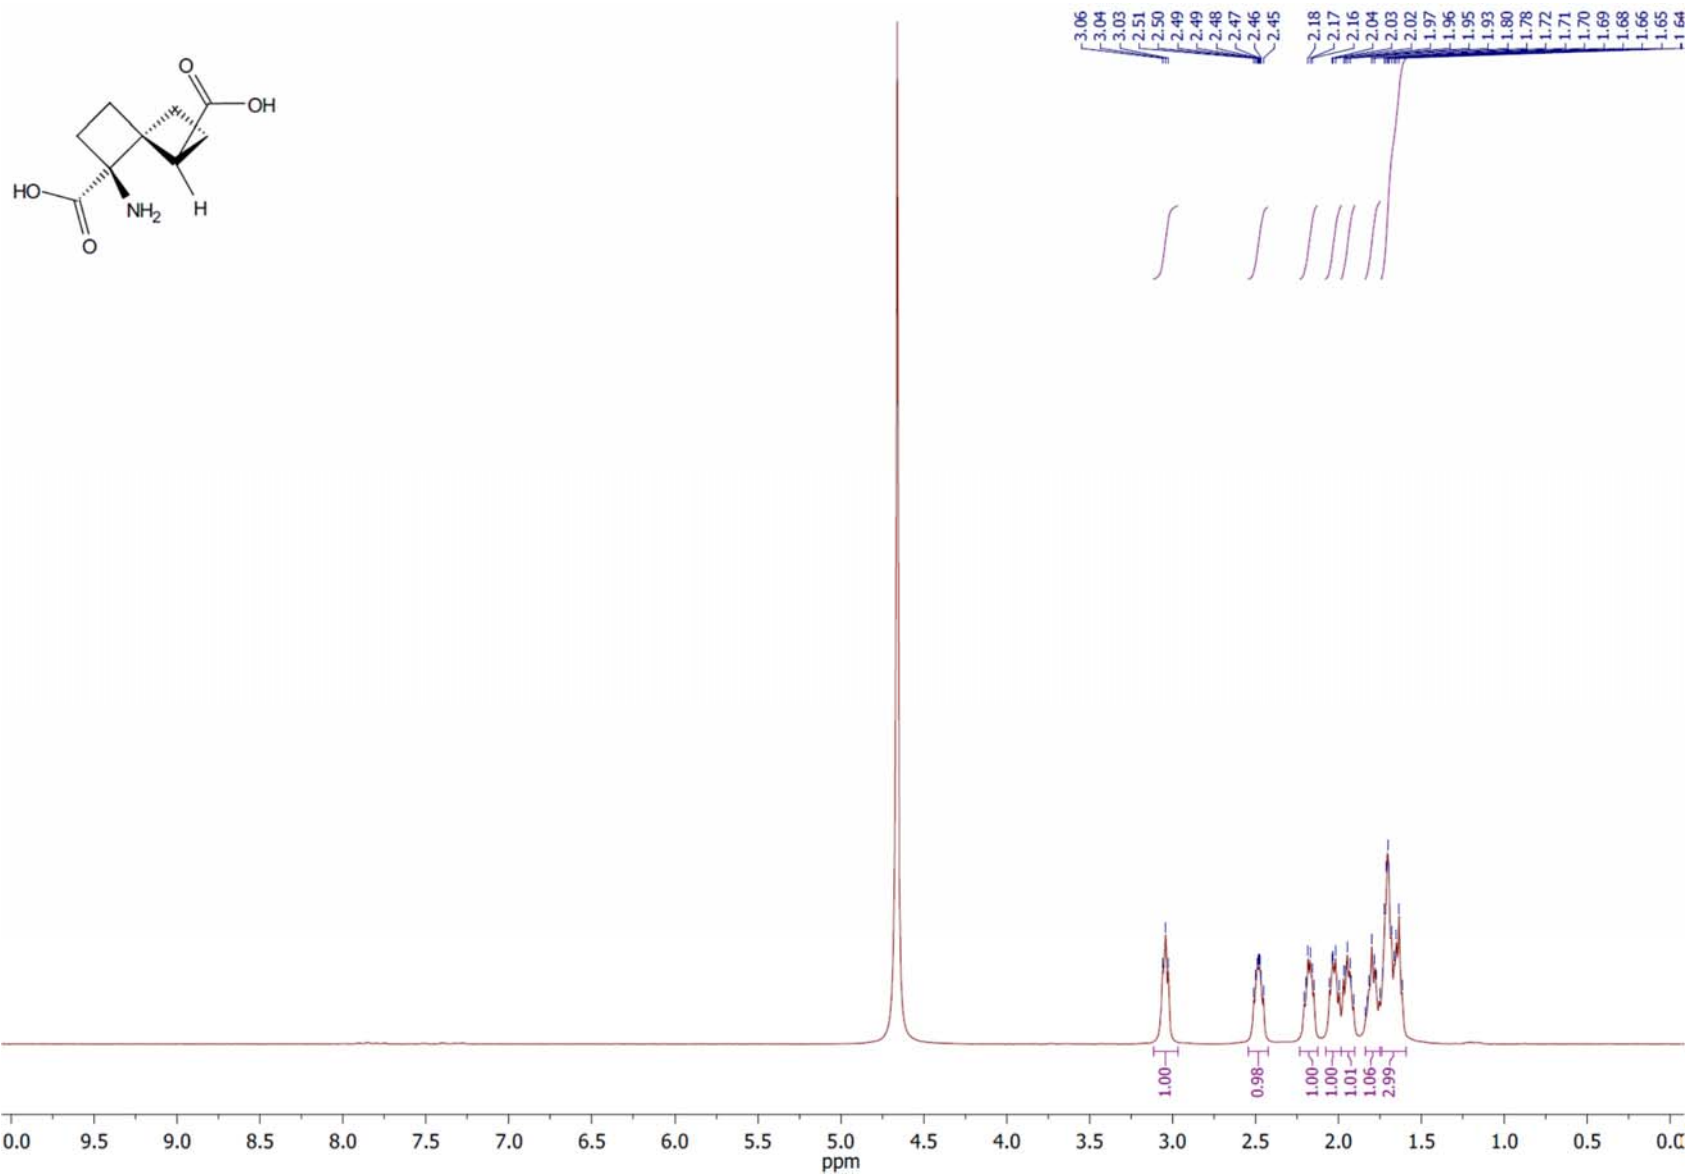

APT  $^{13}\text{C}\{^1\text{H}\}$  NMR spectrum of compound **21b**

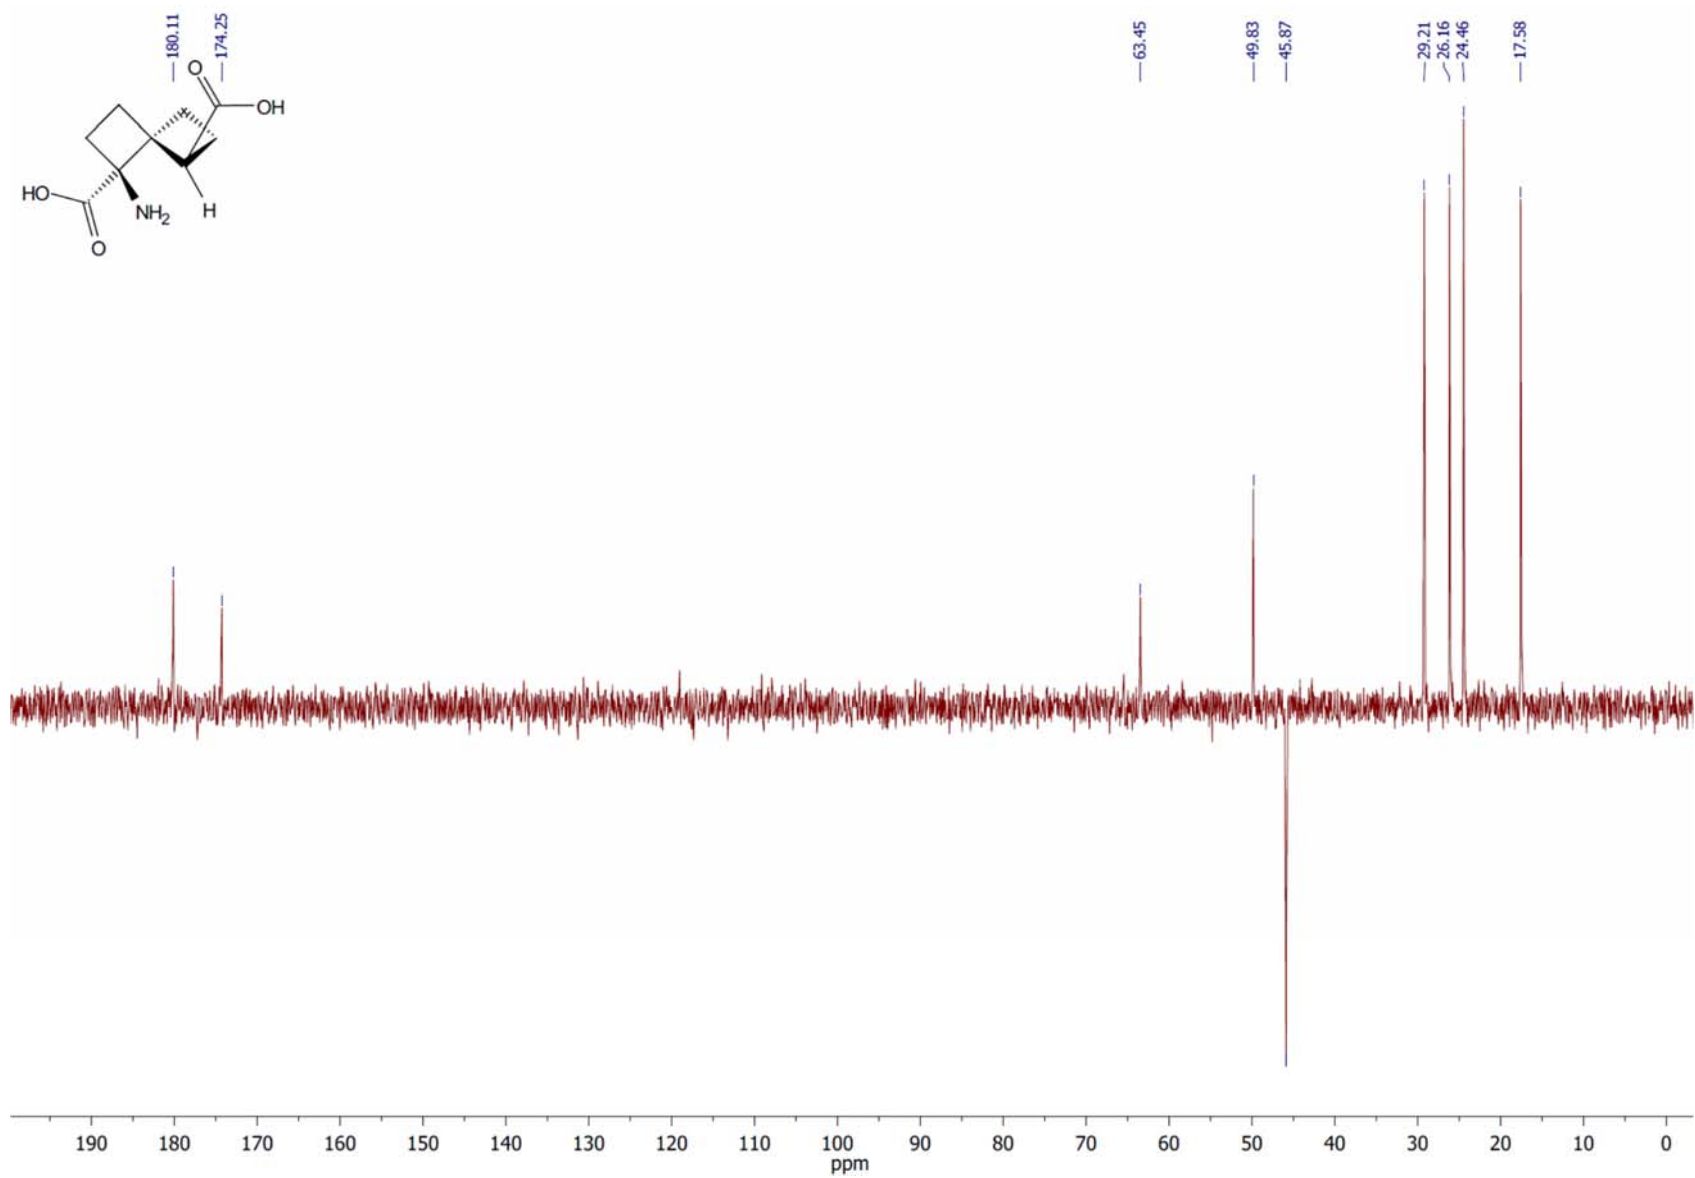

<sup>1</sup>H NMR spectrum of compound **22a**

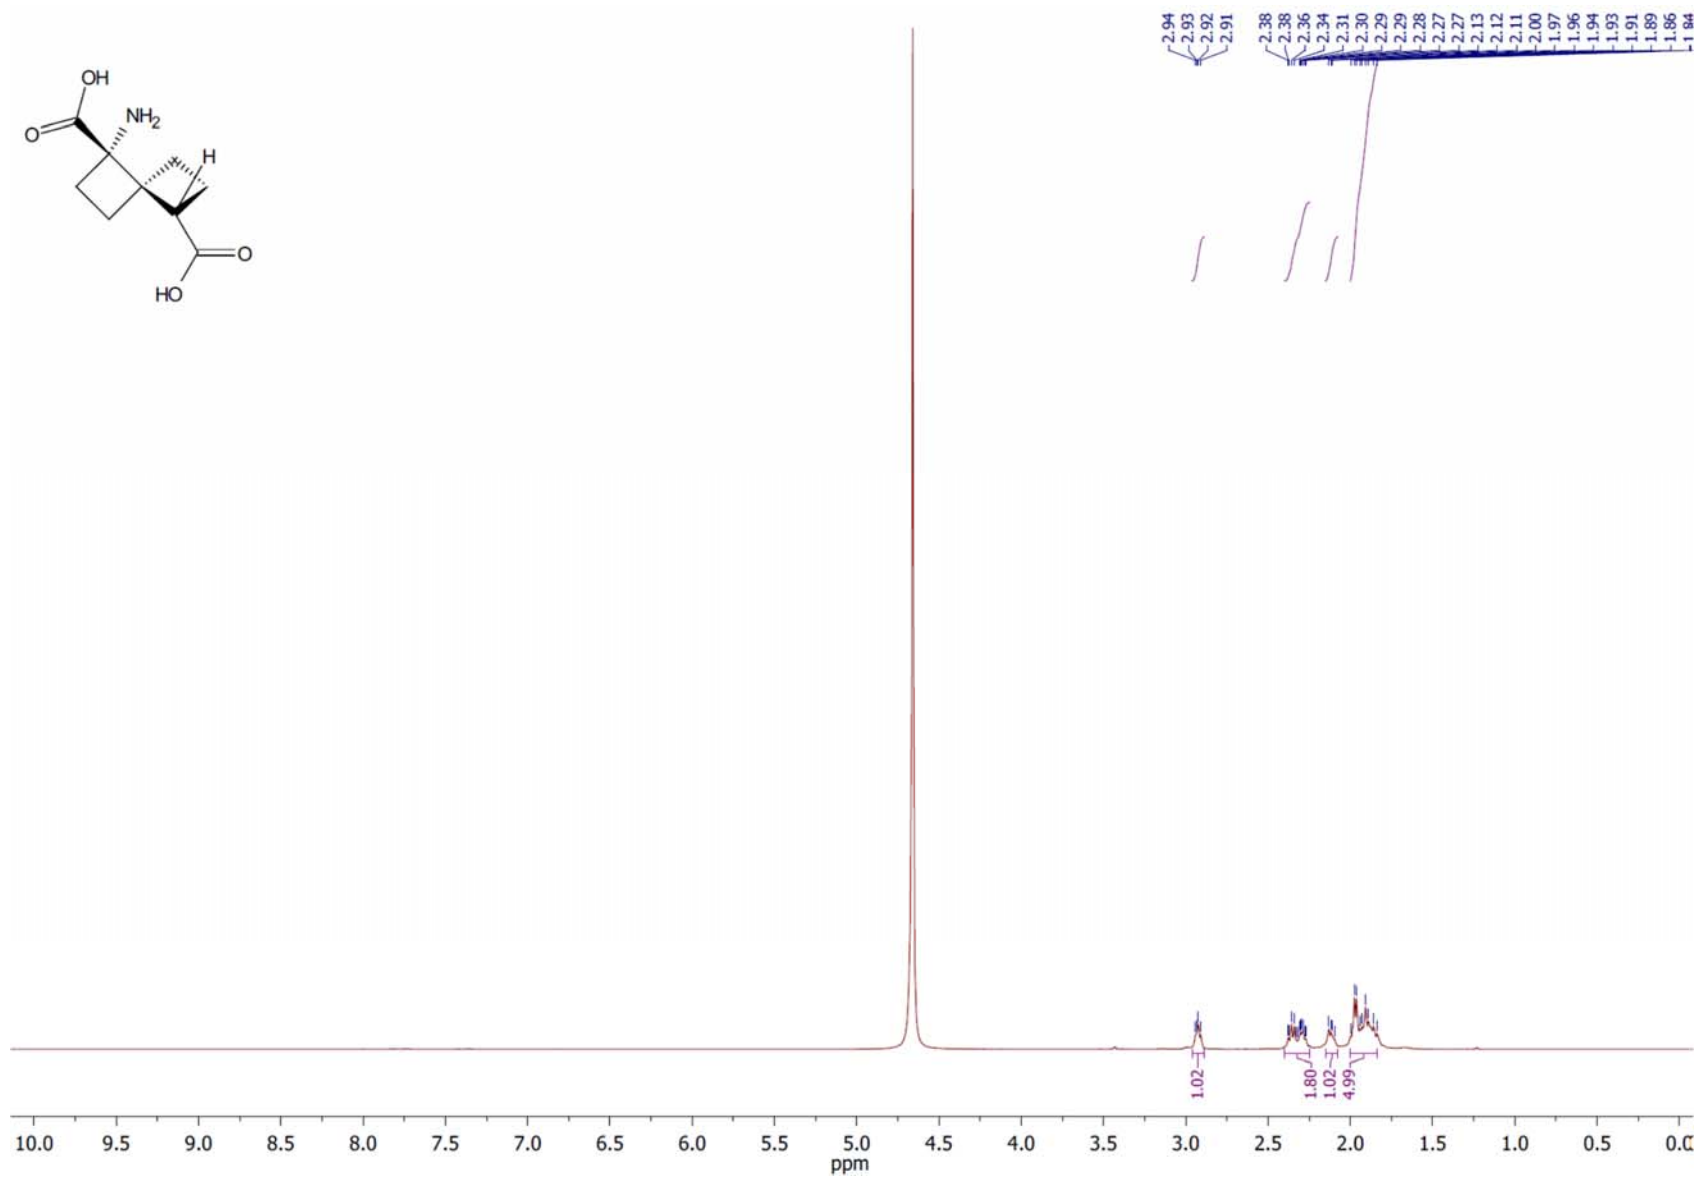



APT  $^{13}\text{C}\{^1\text{H}\}$  NMR spectrum of compound **22a**

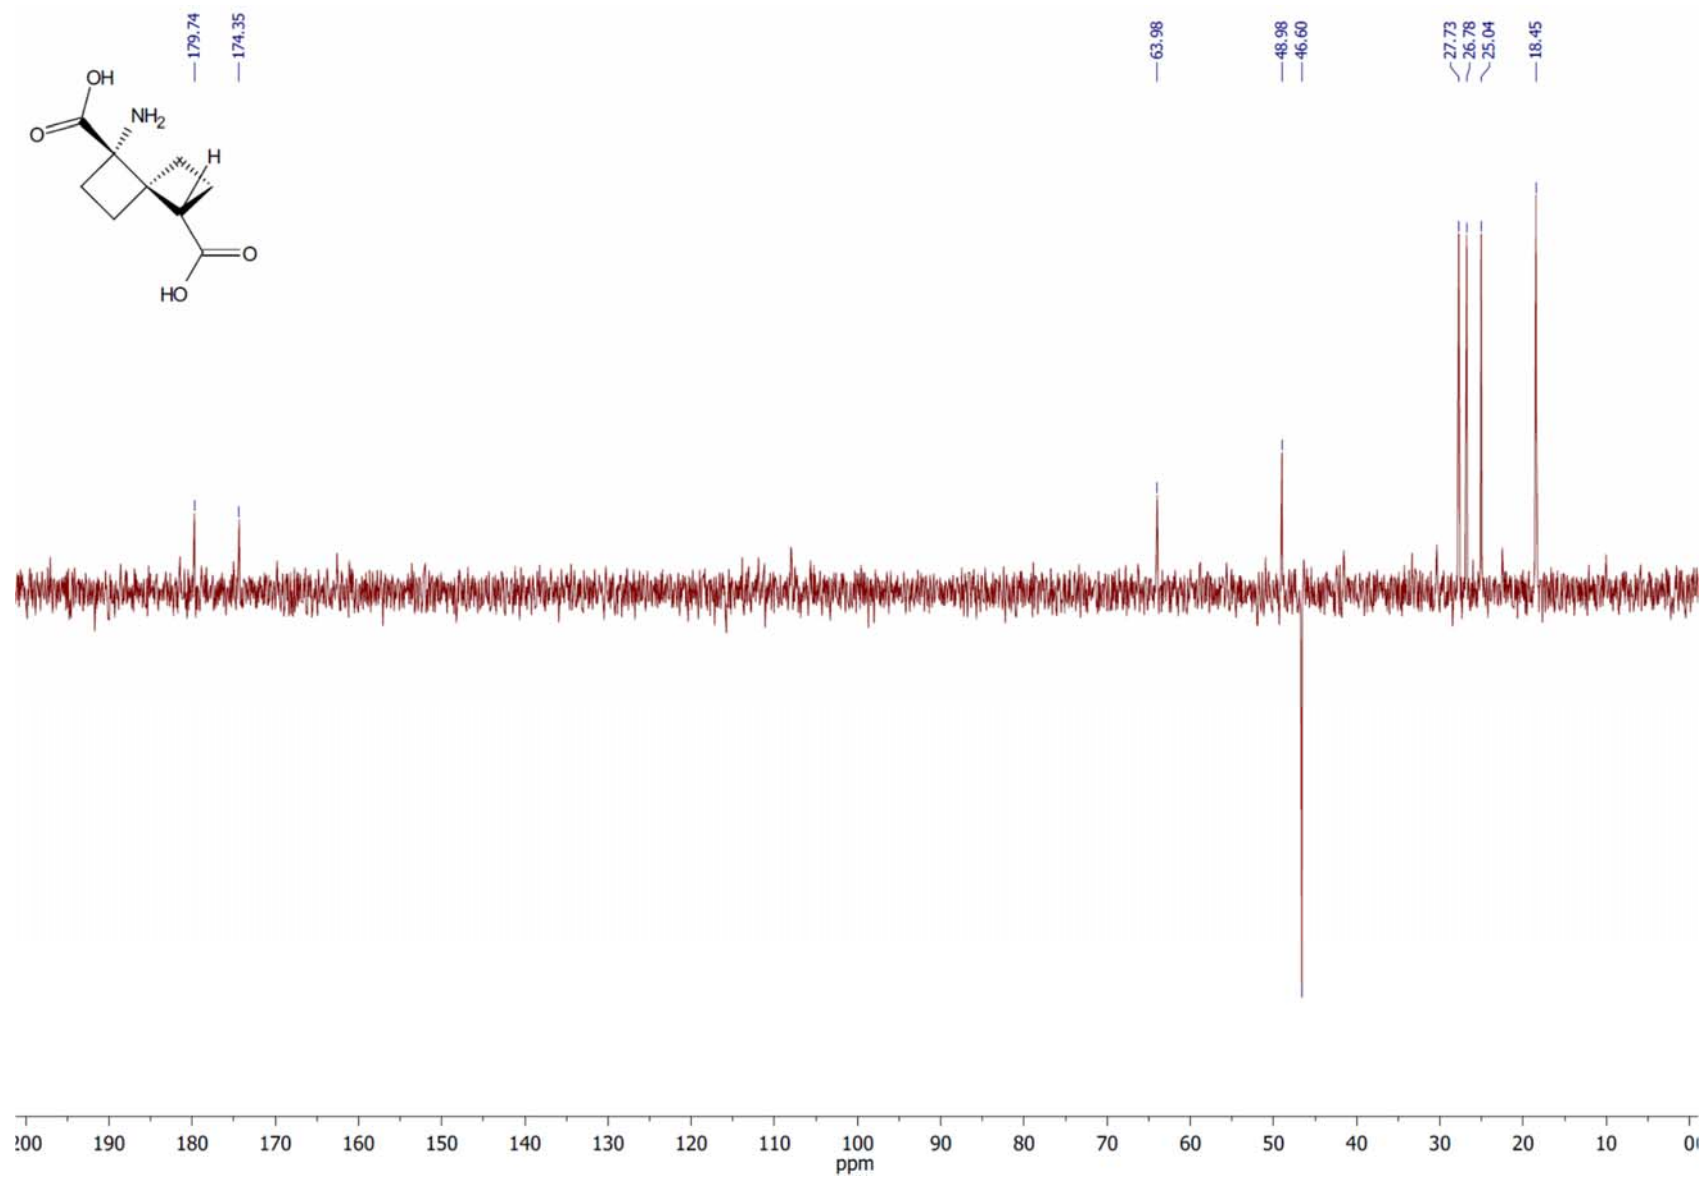

<sup>1</sup>H NMR spectrum of compound **22b**

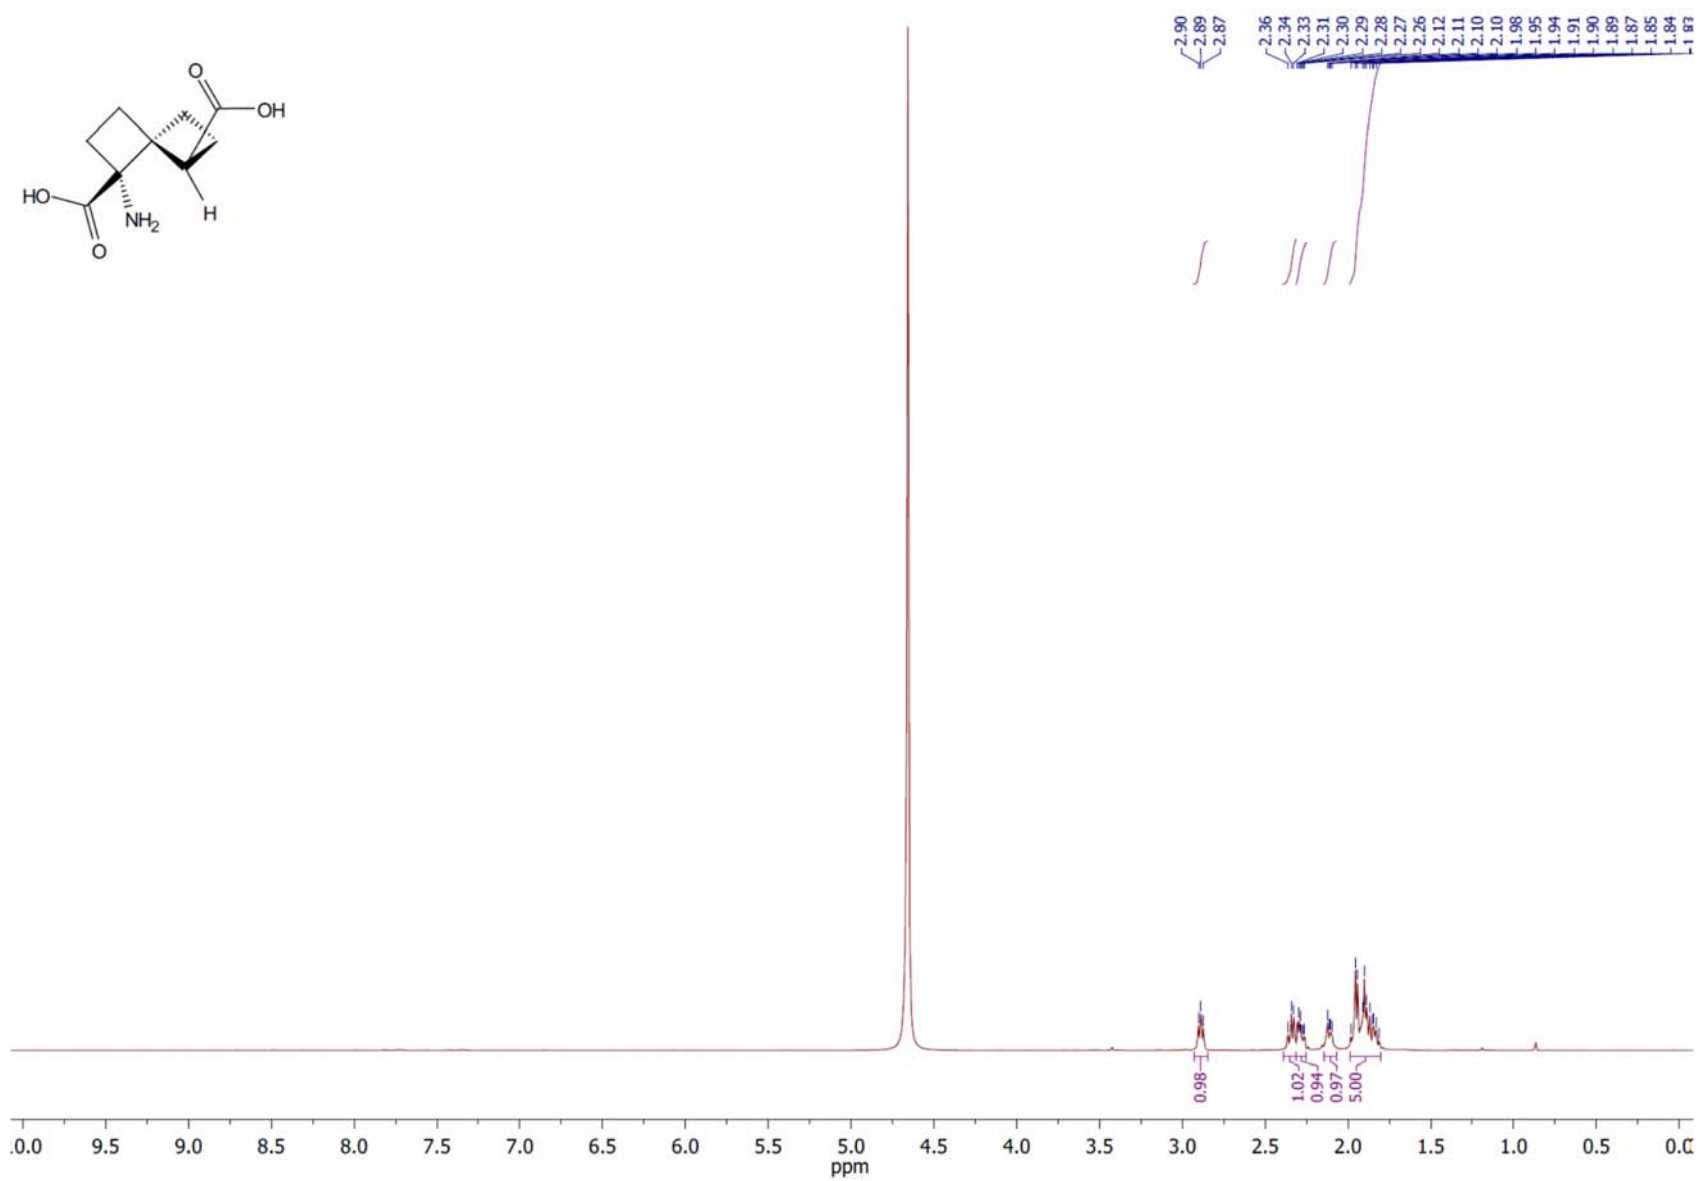

APT  $^{13}\text{C}\{^1\text{H}\}$  NMR spectrum of compound **22b**

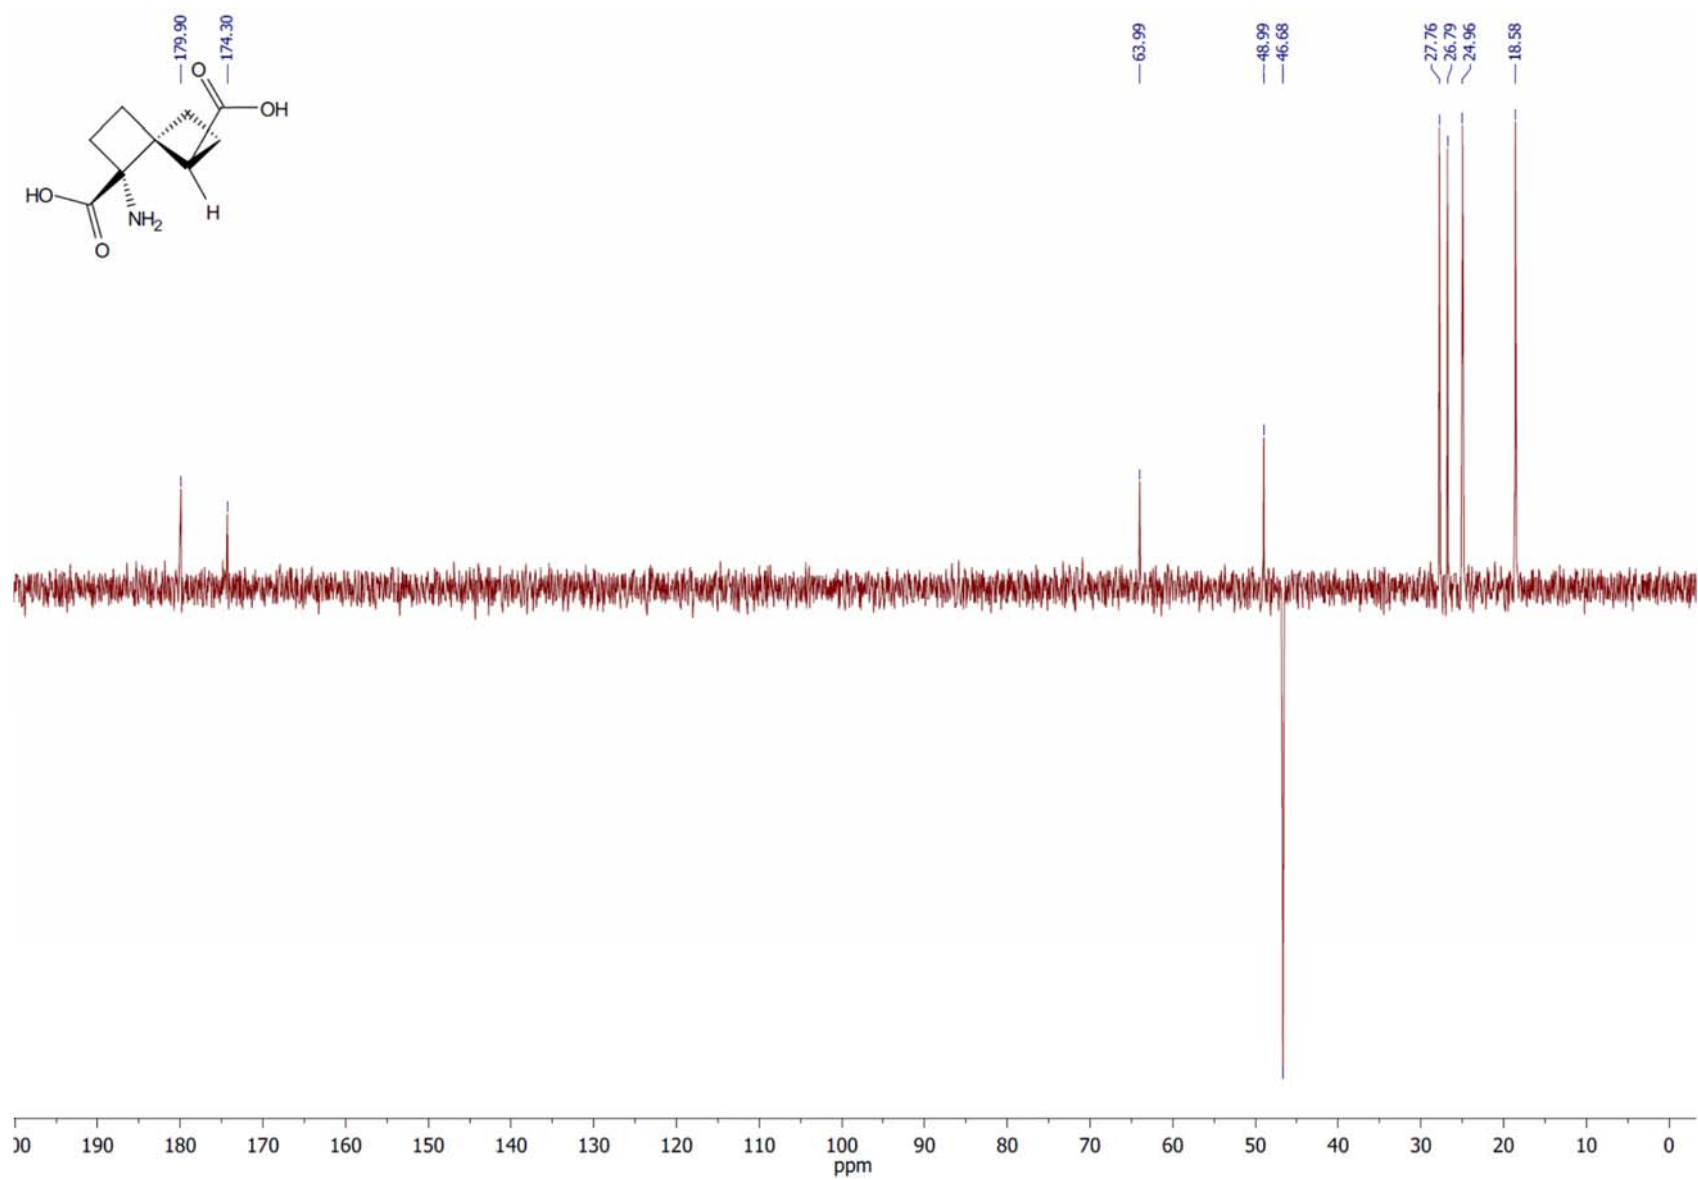

<sup>1</sup>H NMR spectrum of compound **29**

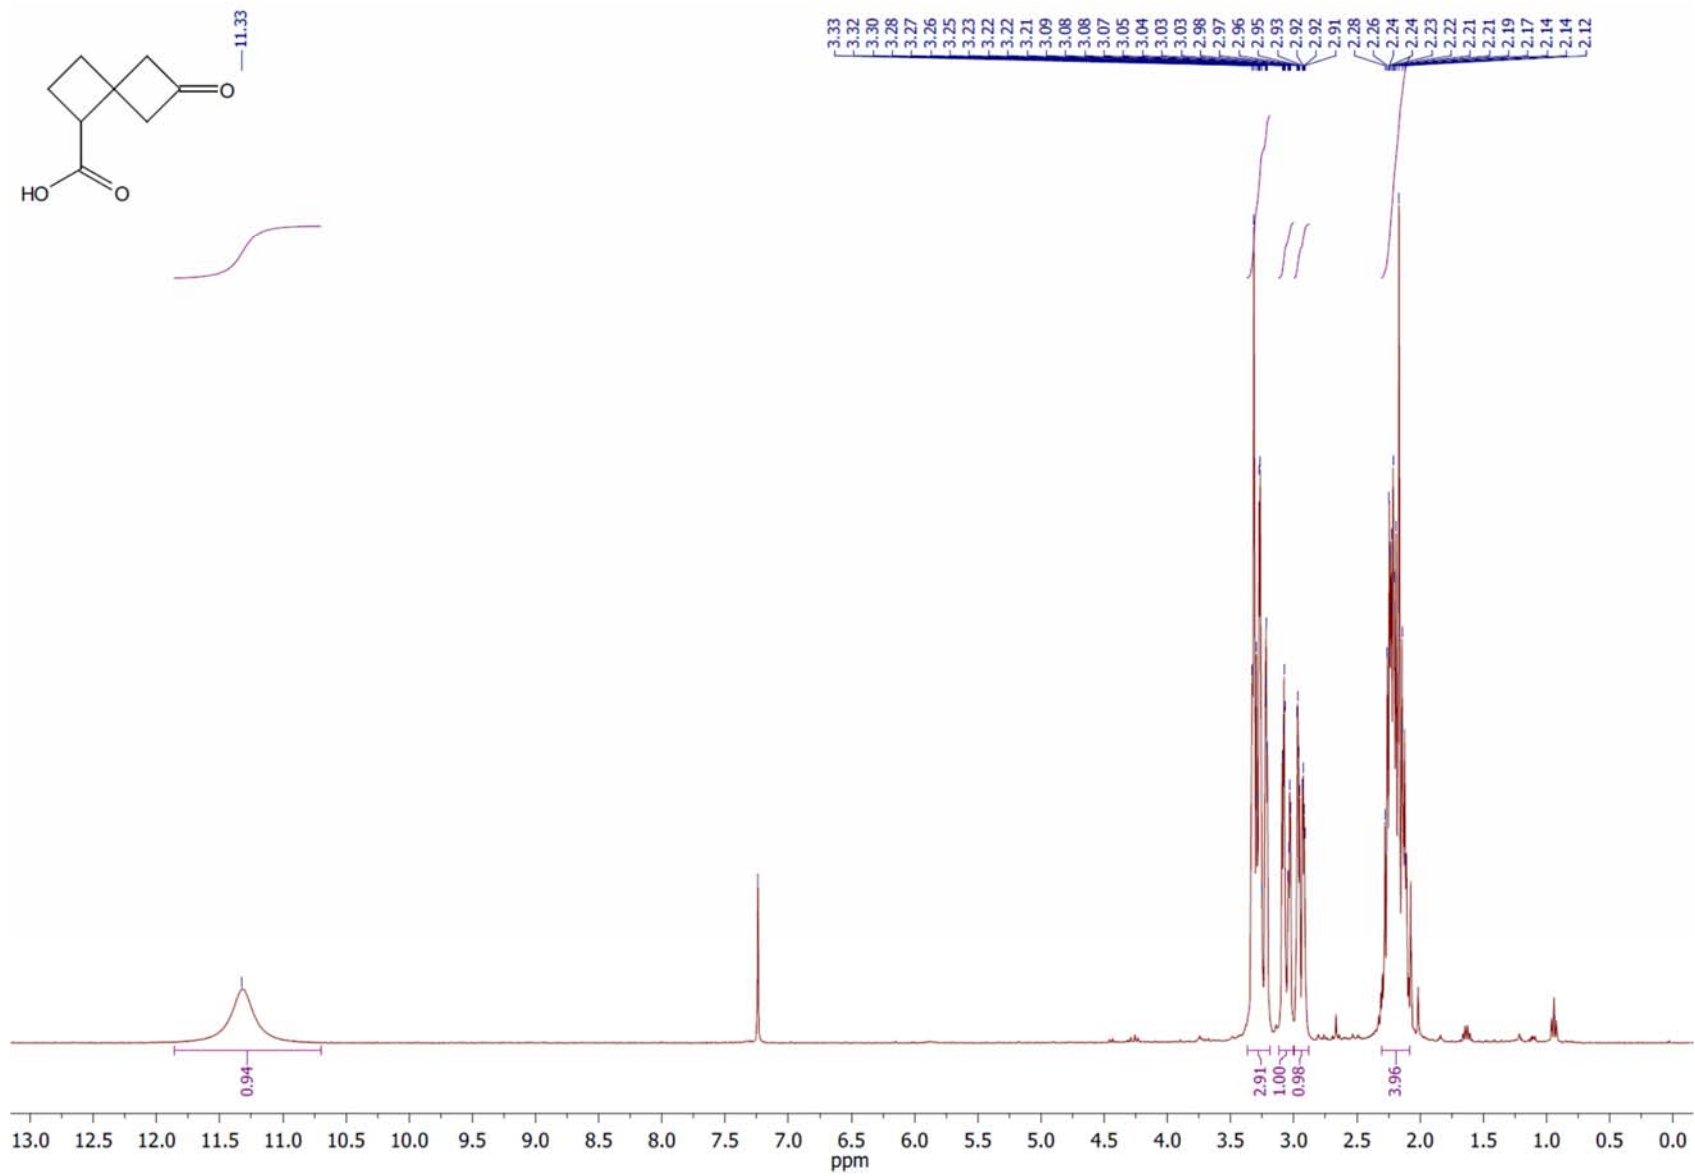

APT  $^{13}\text{C}\{^1\text{H}\}$  NMR spectrum of compound **29**

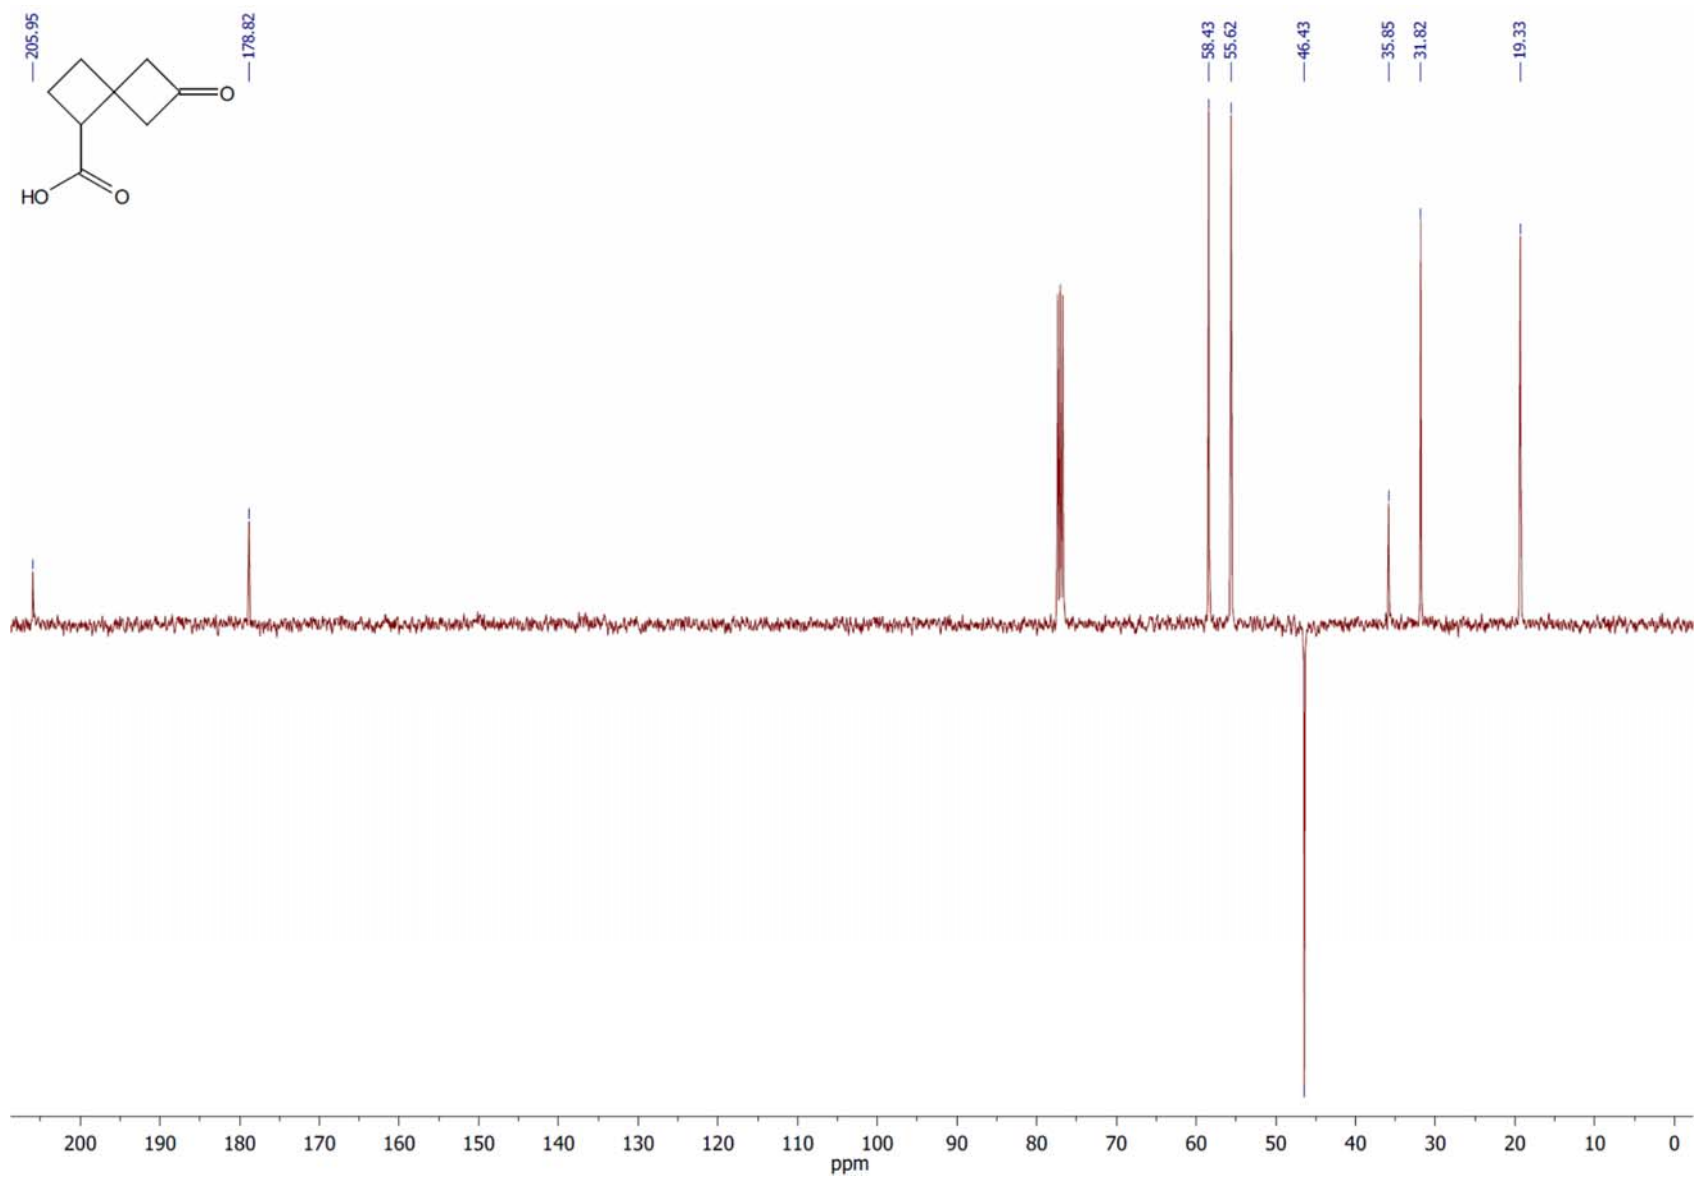

<sup>1</sup>H NMR spectrum of compound **30a**

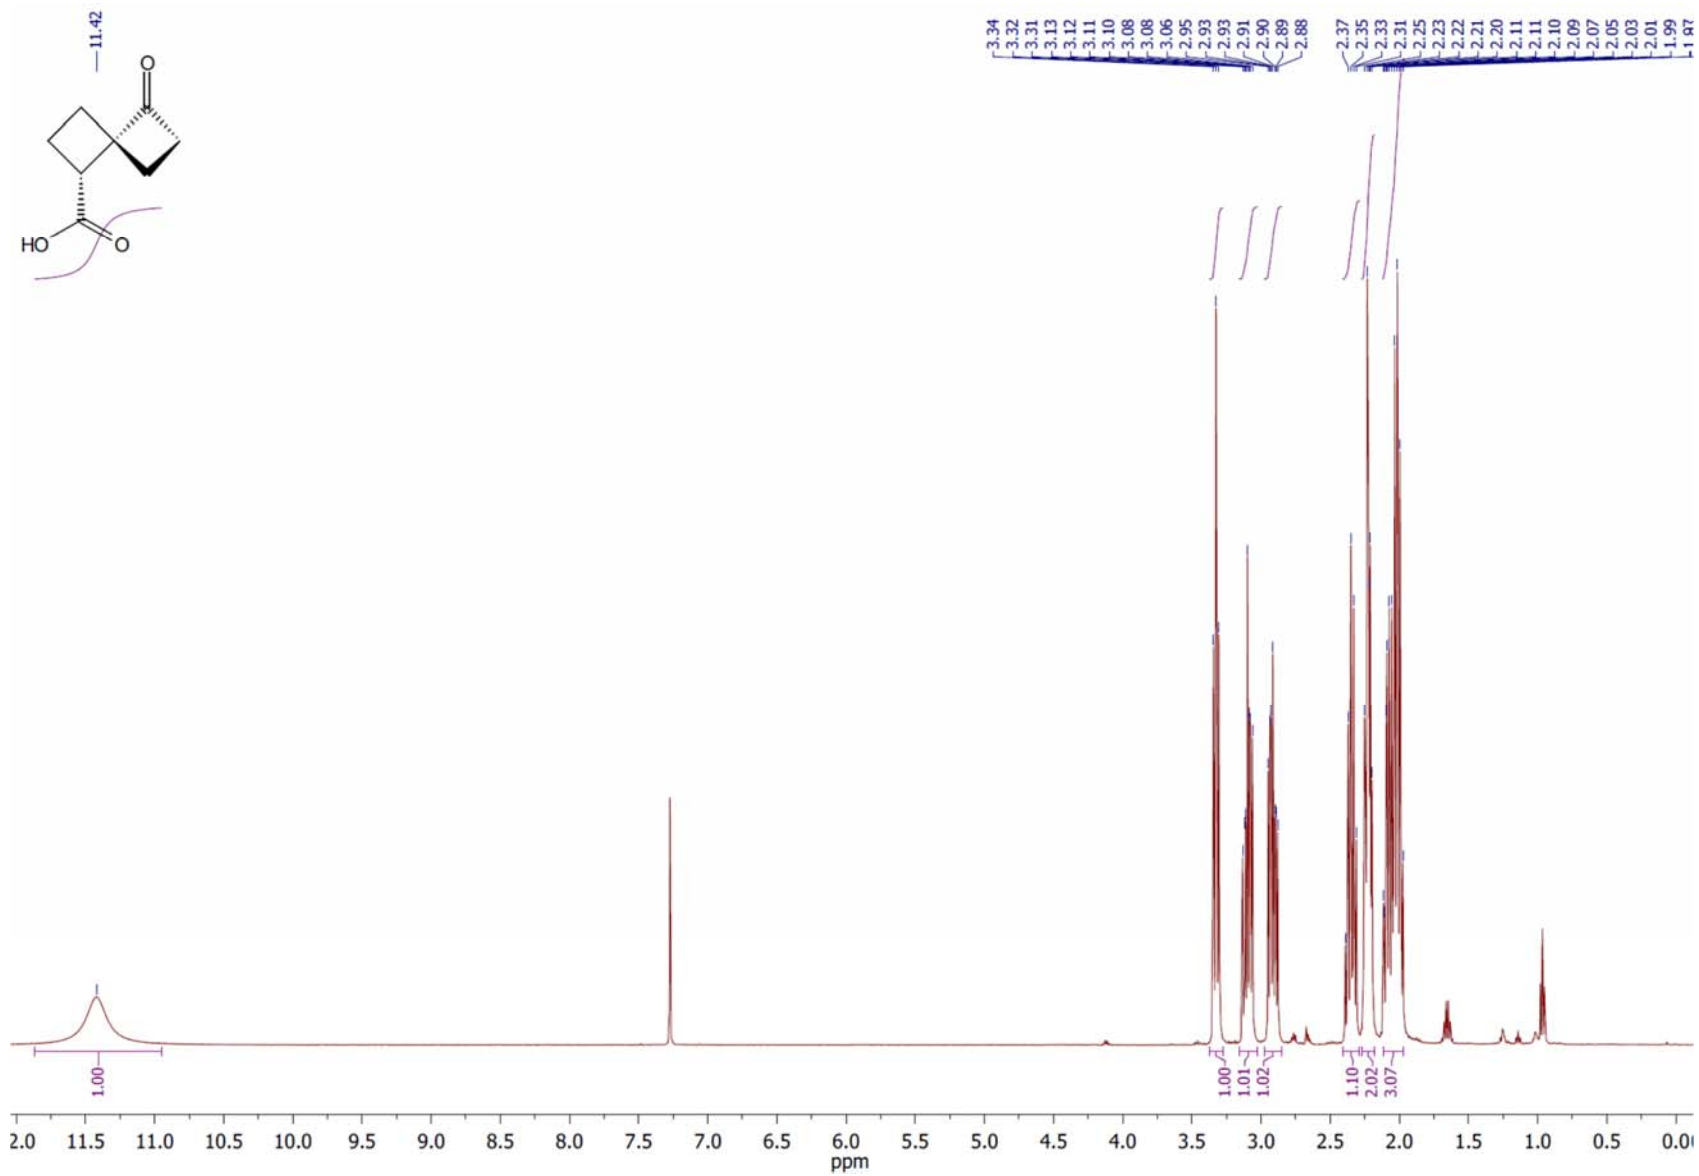

APT  $^{13}\text{C}\{^1\text{H}\}$  NMR spectrum of compound **30a**

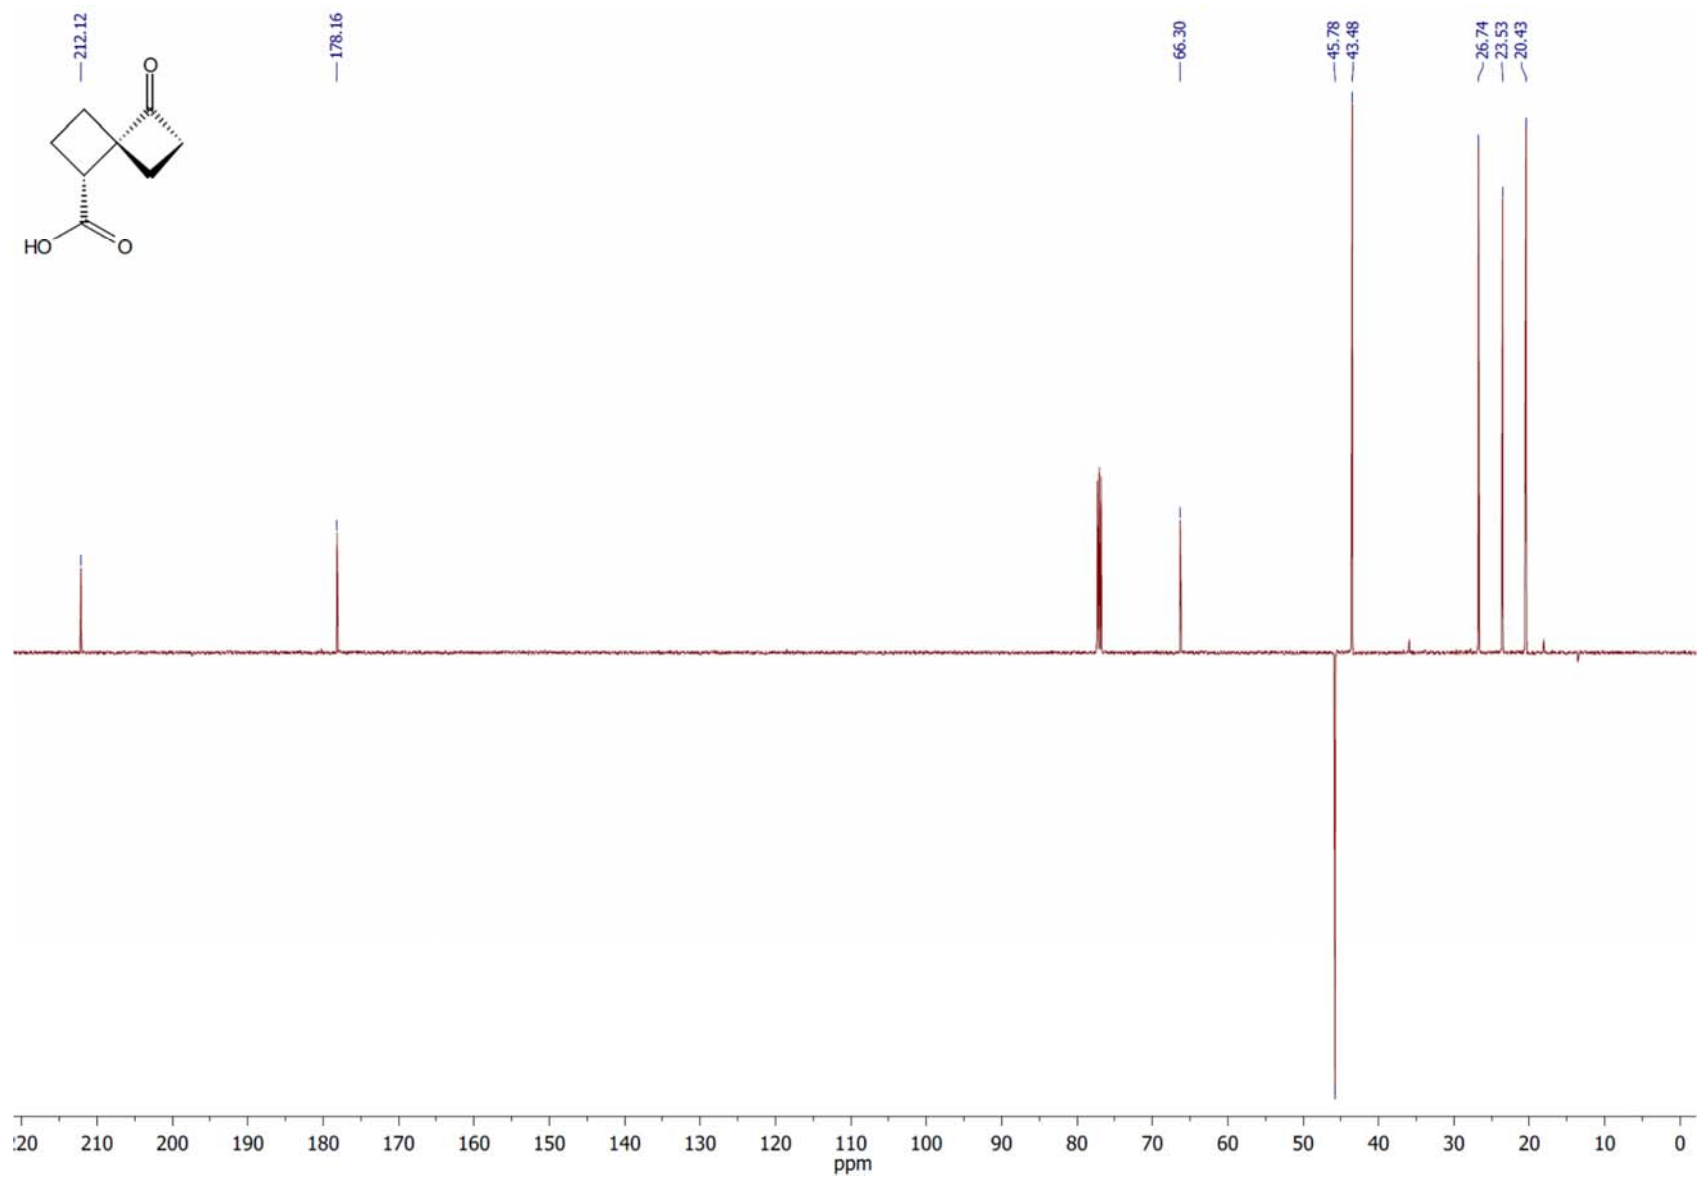

<sup>1</sup>H NMR spectrum of compound **30b**

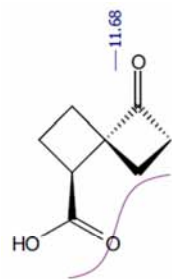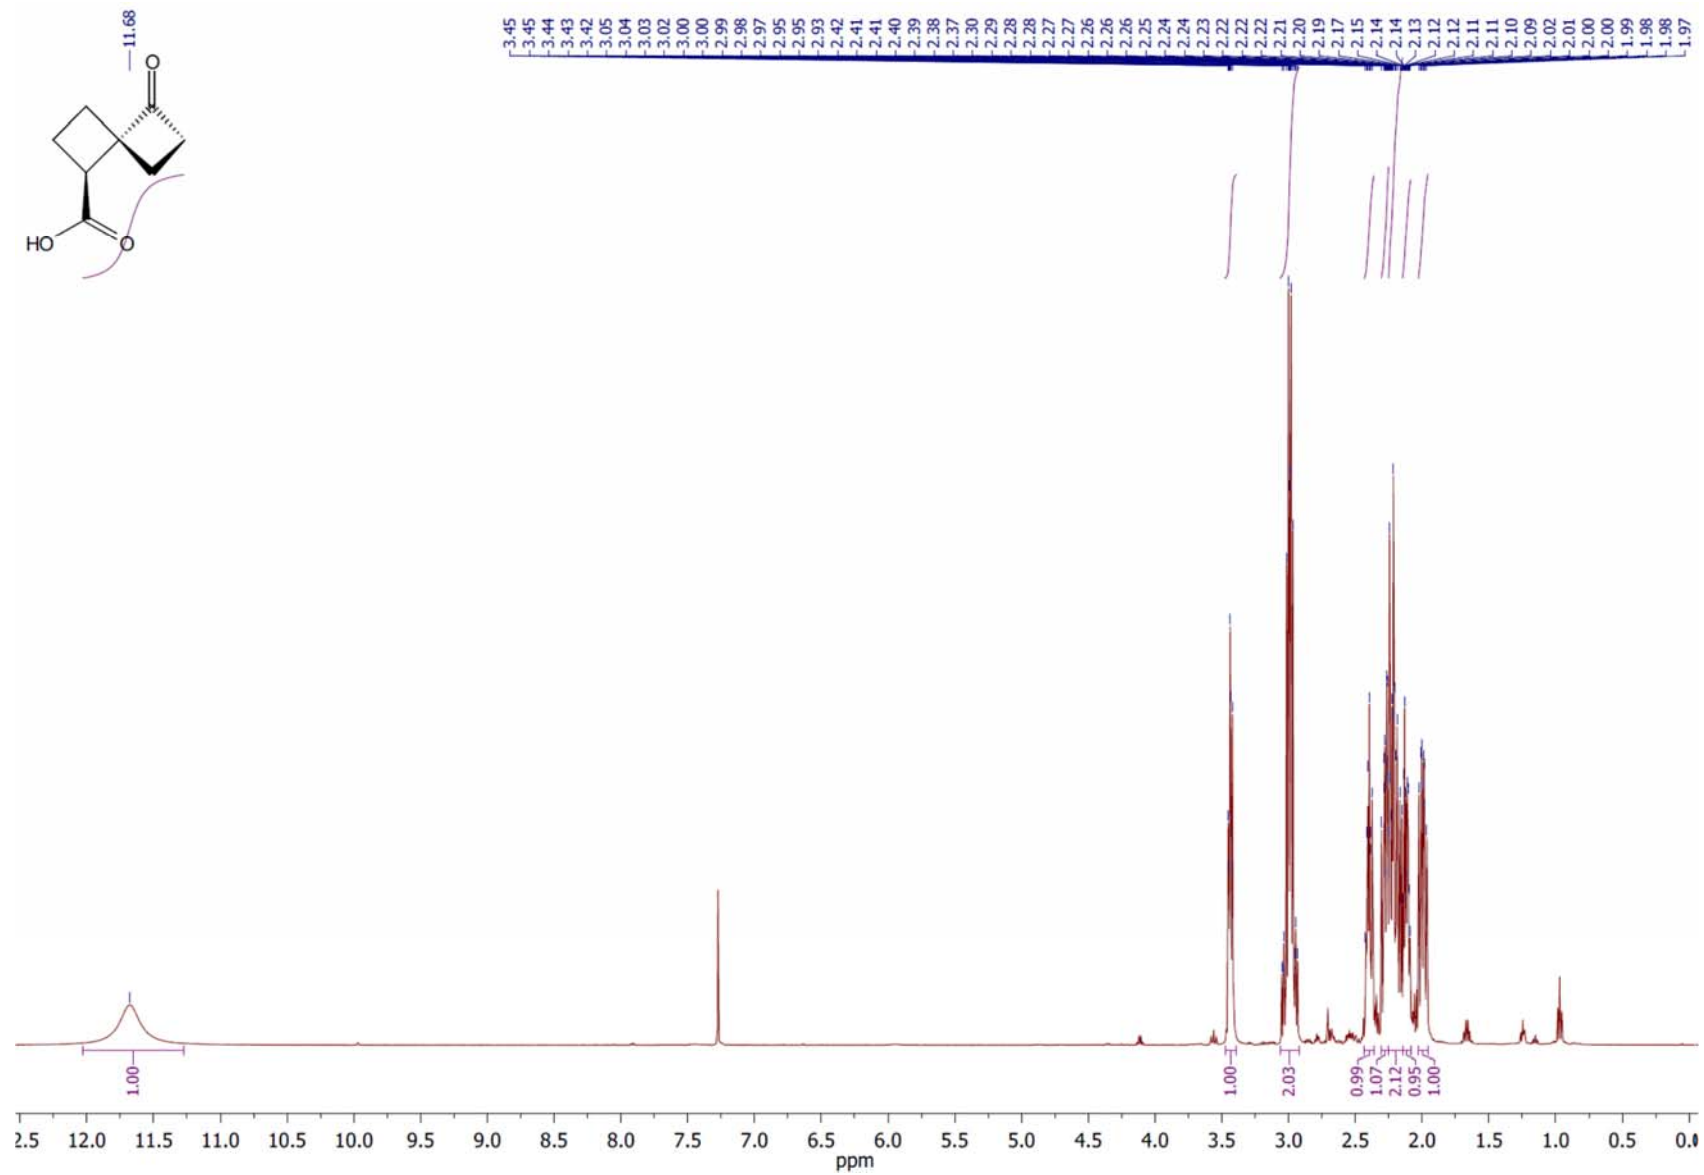



APT  $^{13}\text{C}\{^1\text{H}\}$  NMR spectrum of compound **30b**

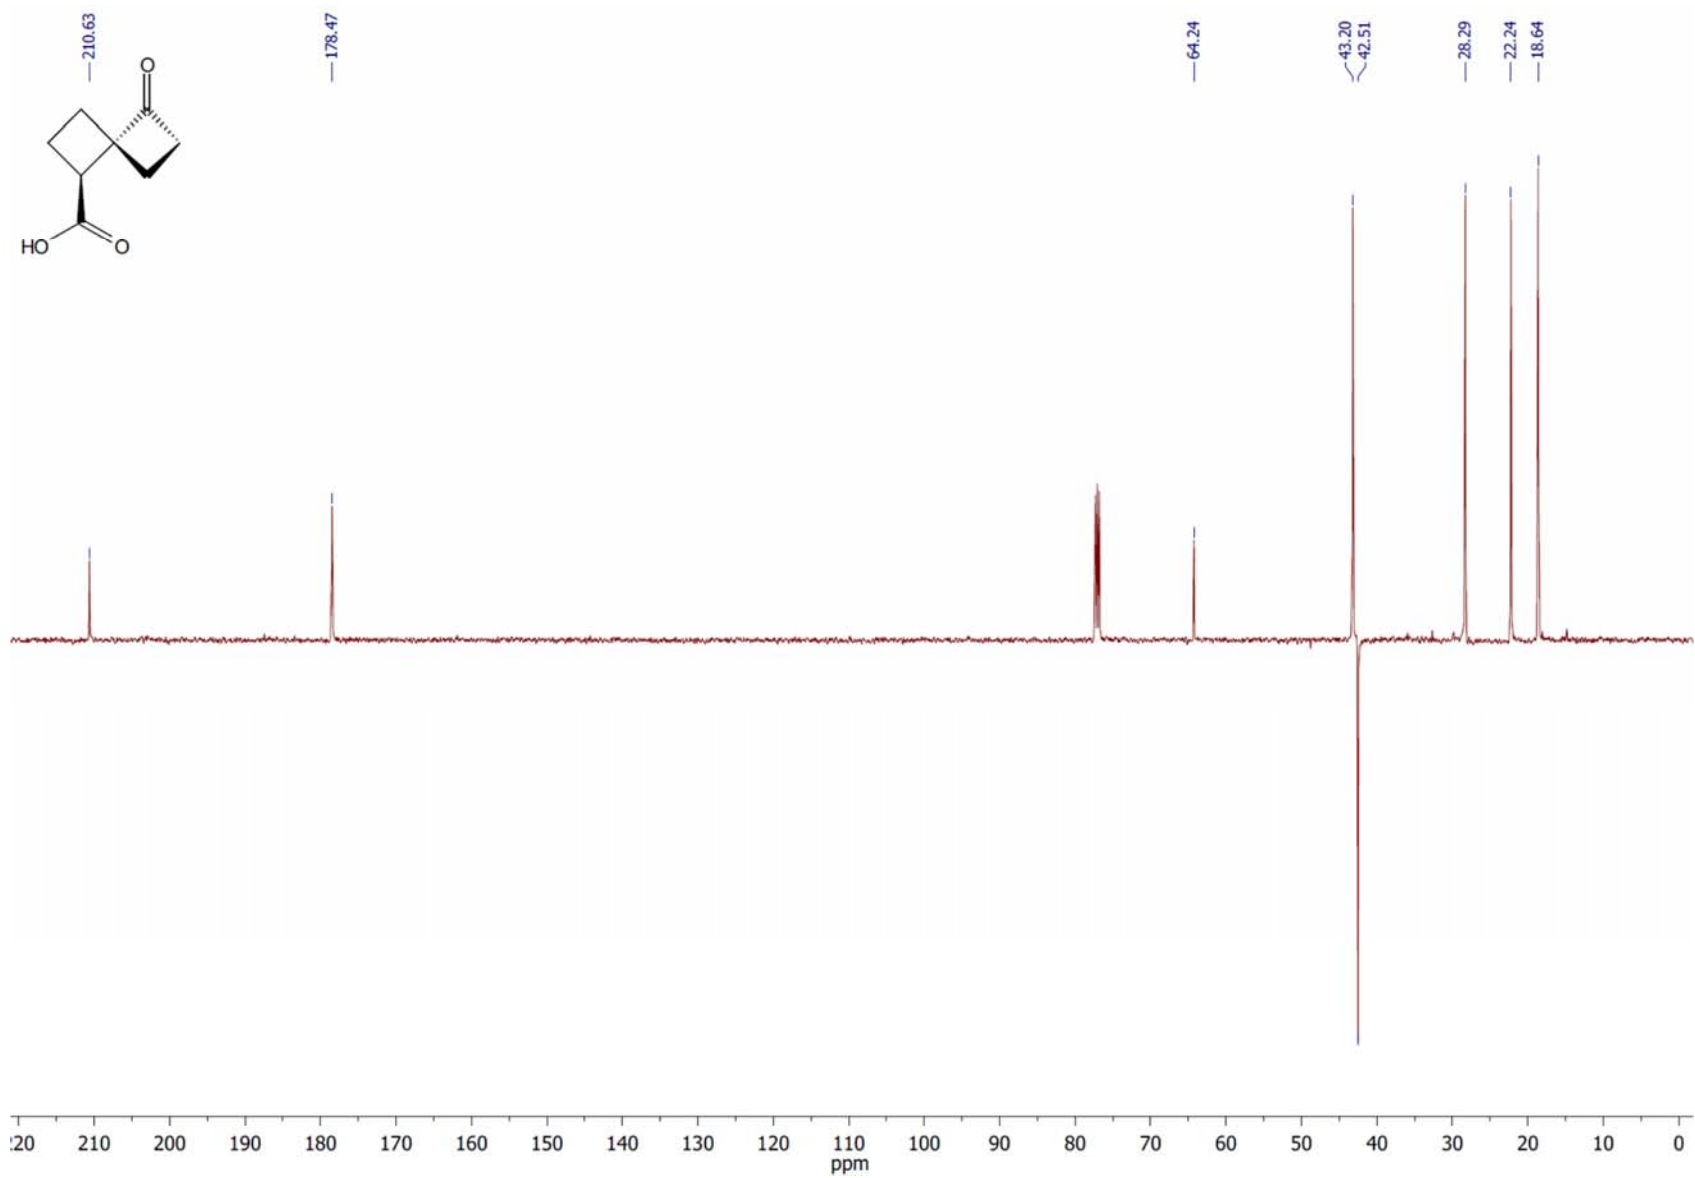

<sup>1</sup>H NMR spectrum of compound **38**

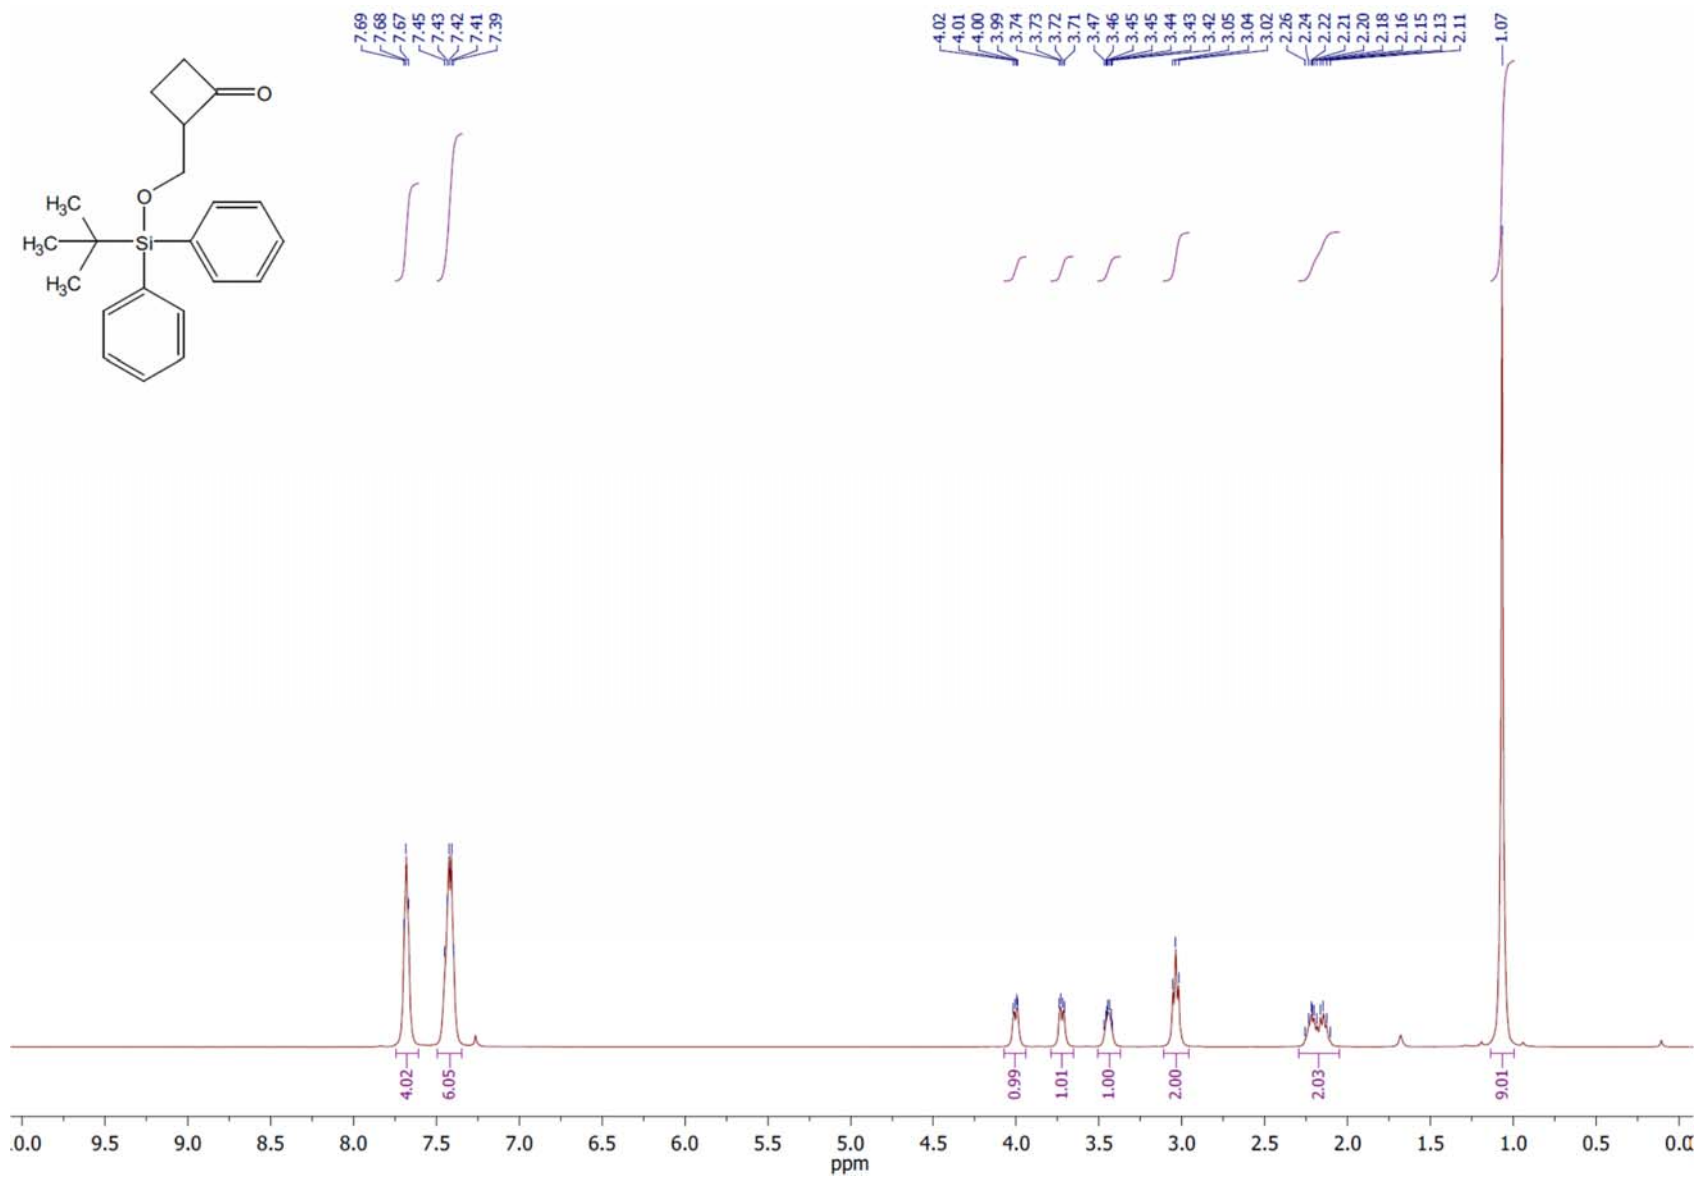

APT  $^{13}\text{C}\{^1\text{H}\}$  NMR spectrum of compound **38**

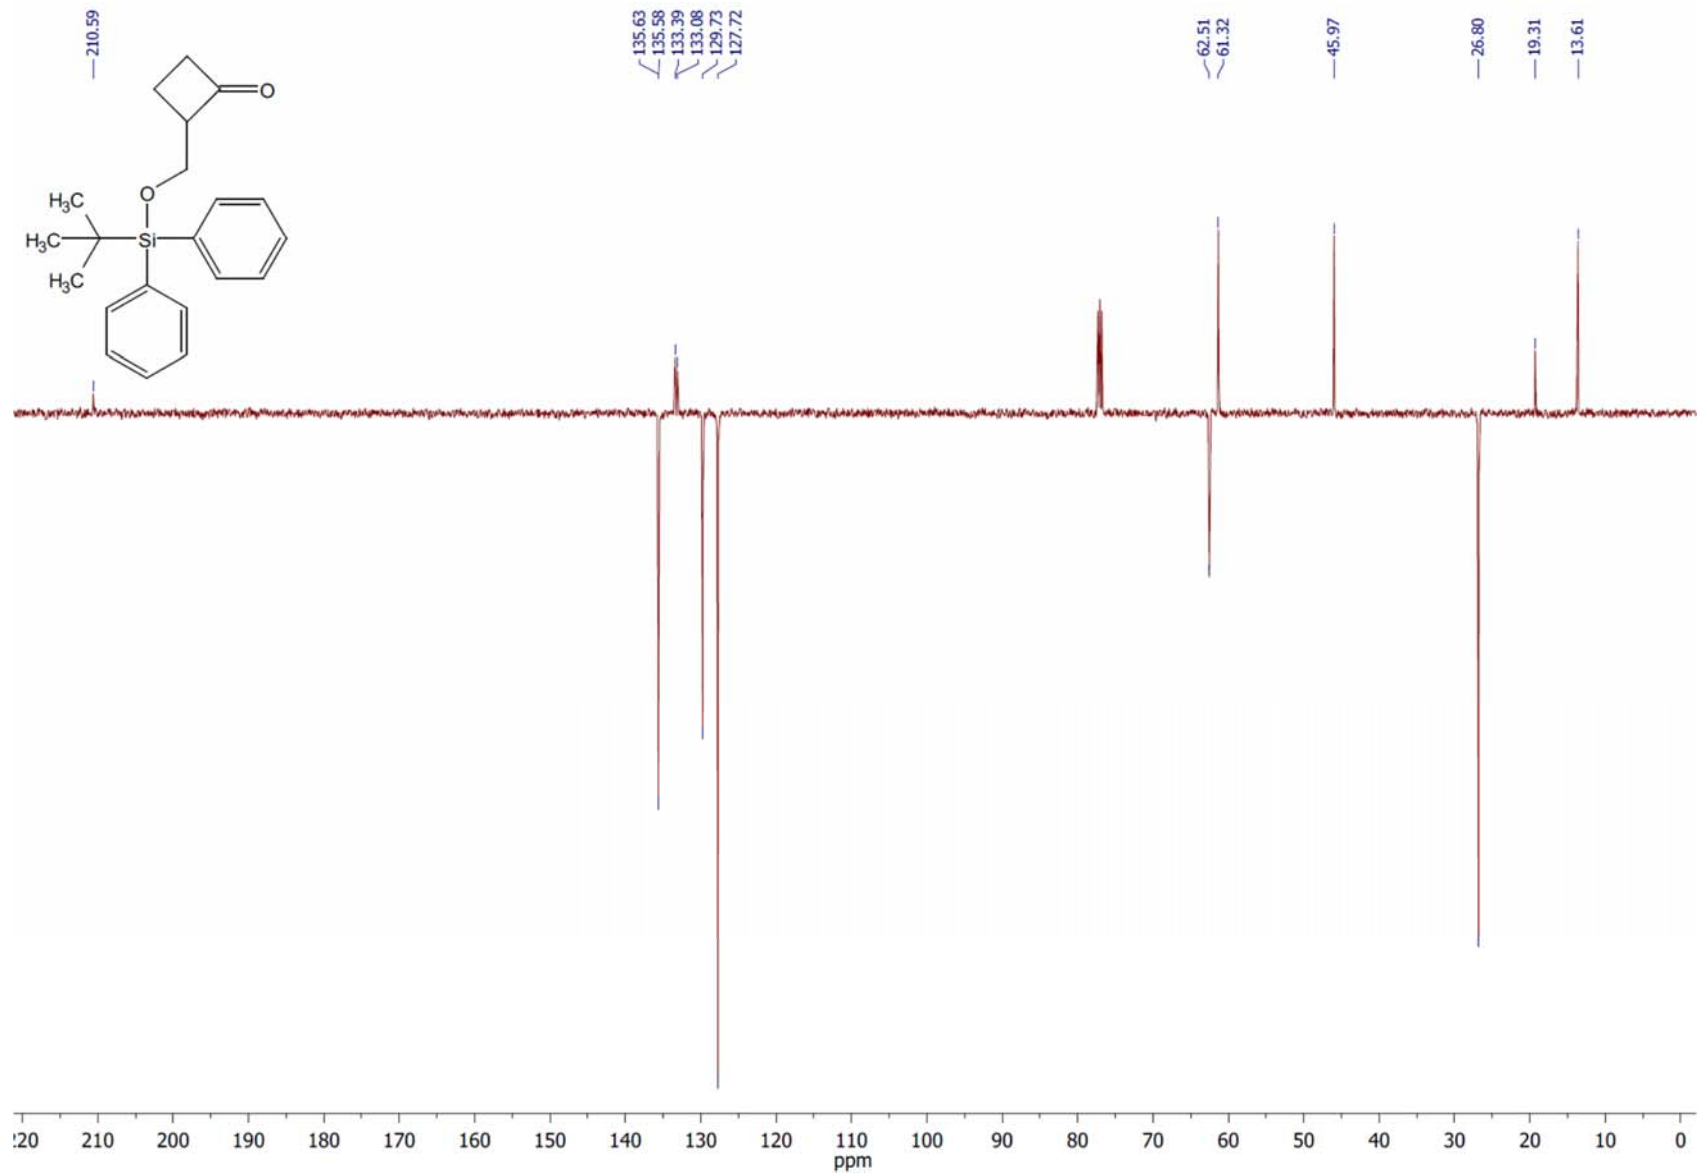

<sup>1</sup>H NMR spectrum of compound **39**

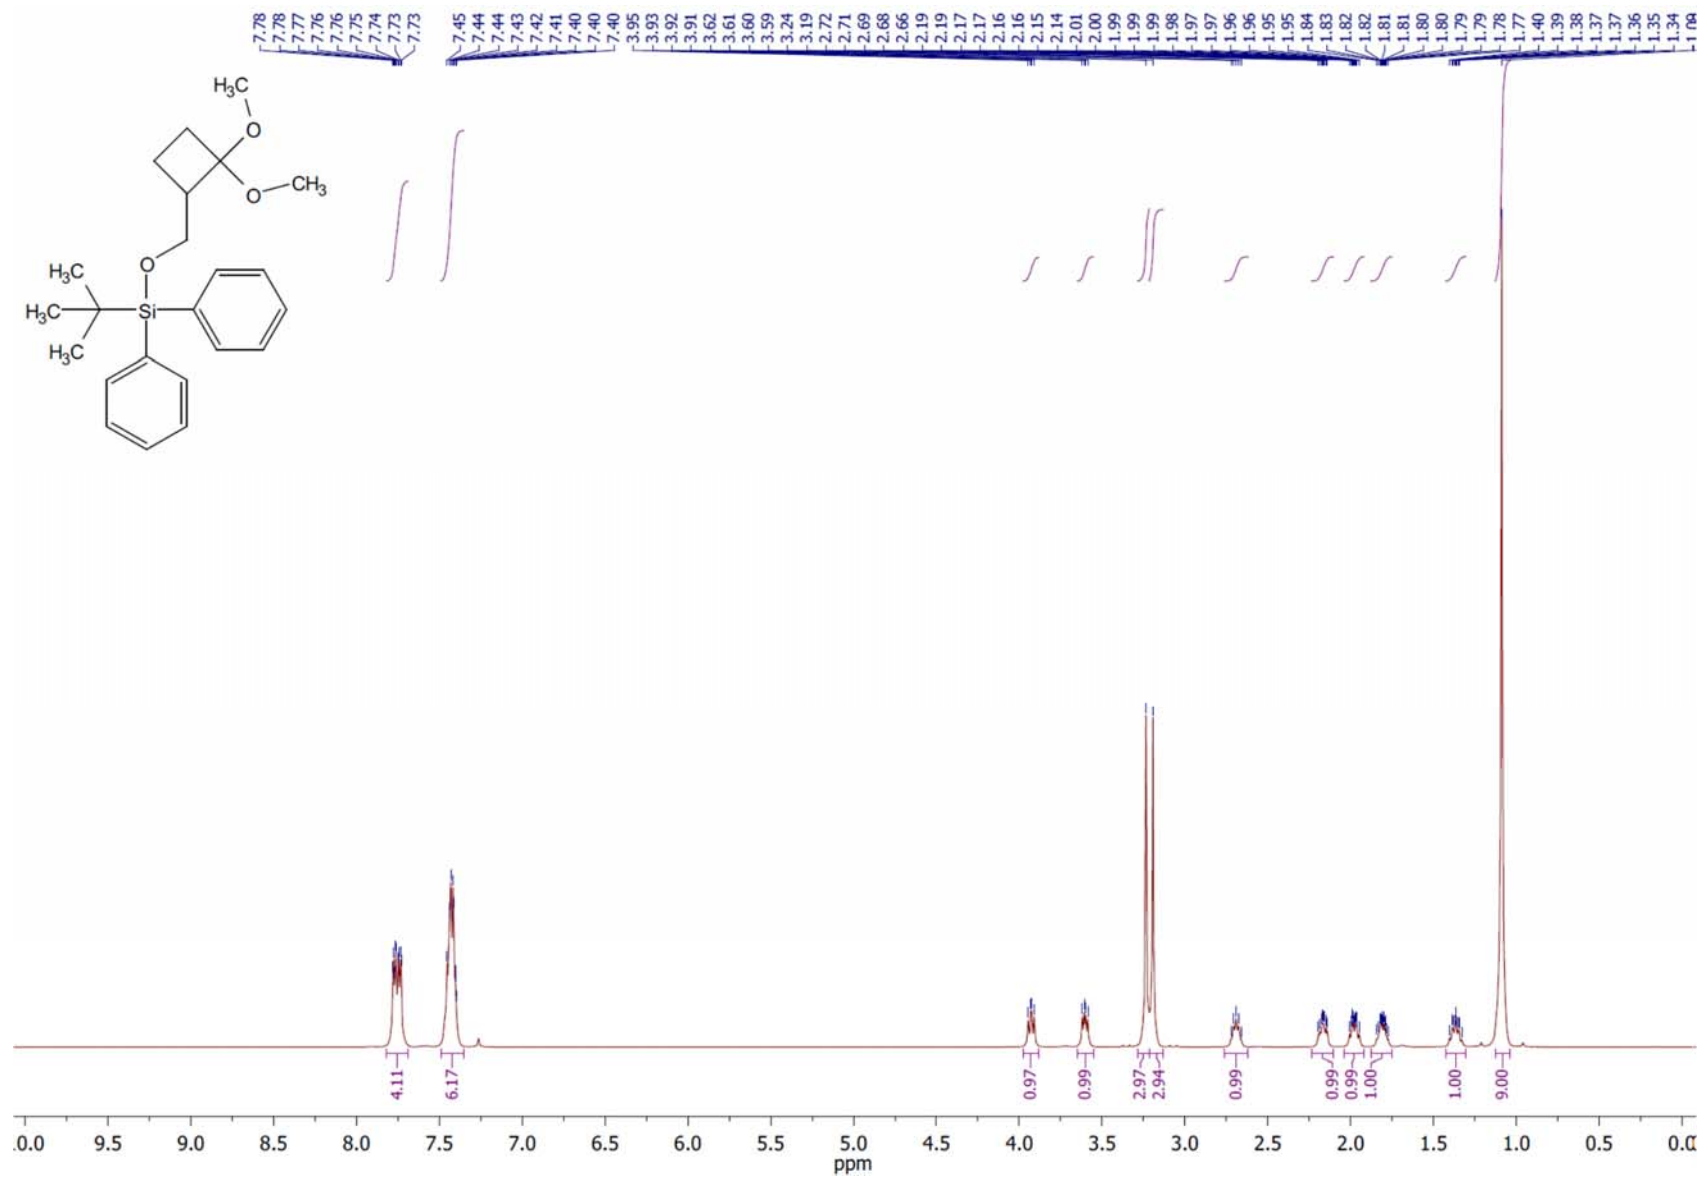

APT  $^{13}\text{C}\{^1\text{H}\}$  NMR spectrum of compound **39**

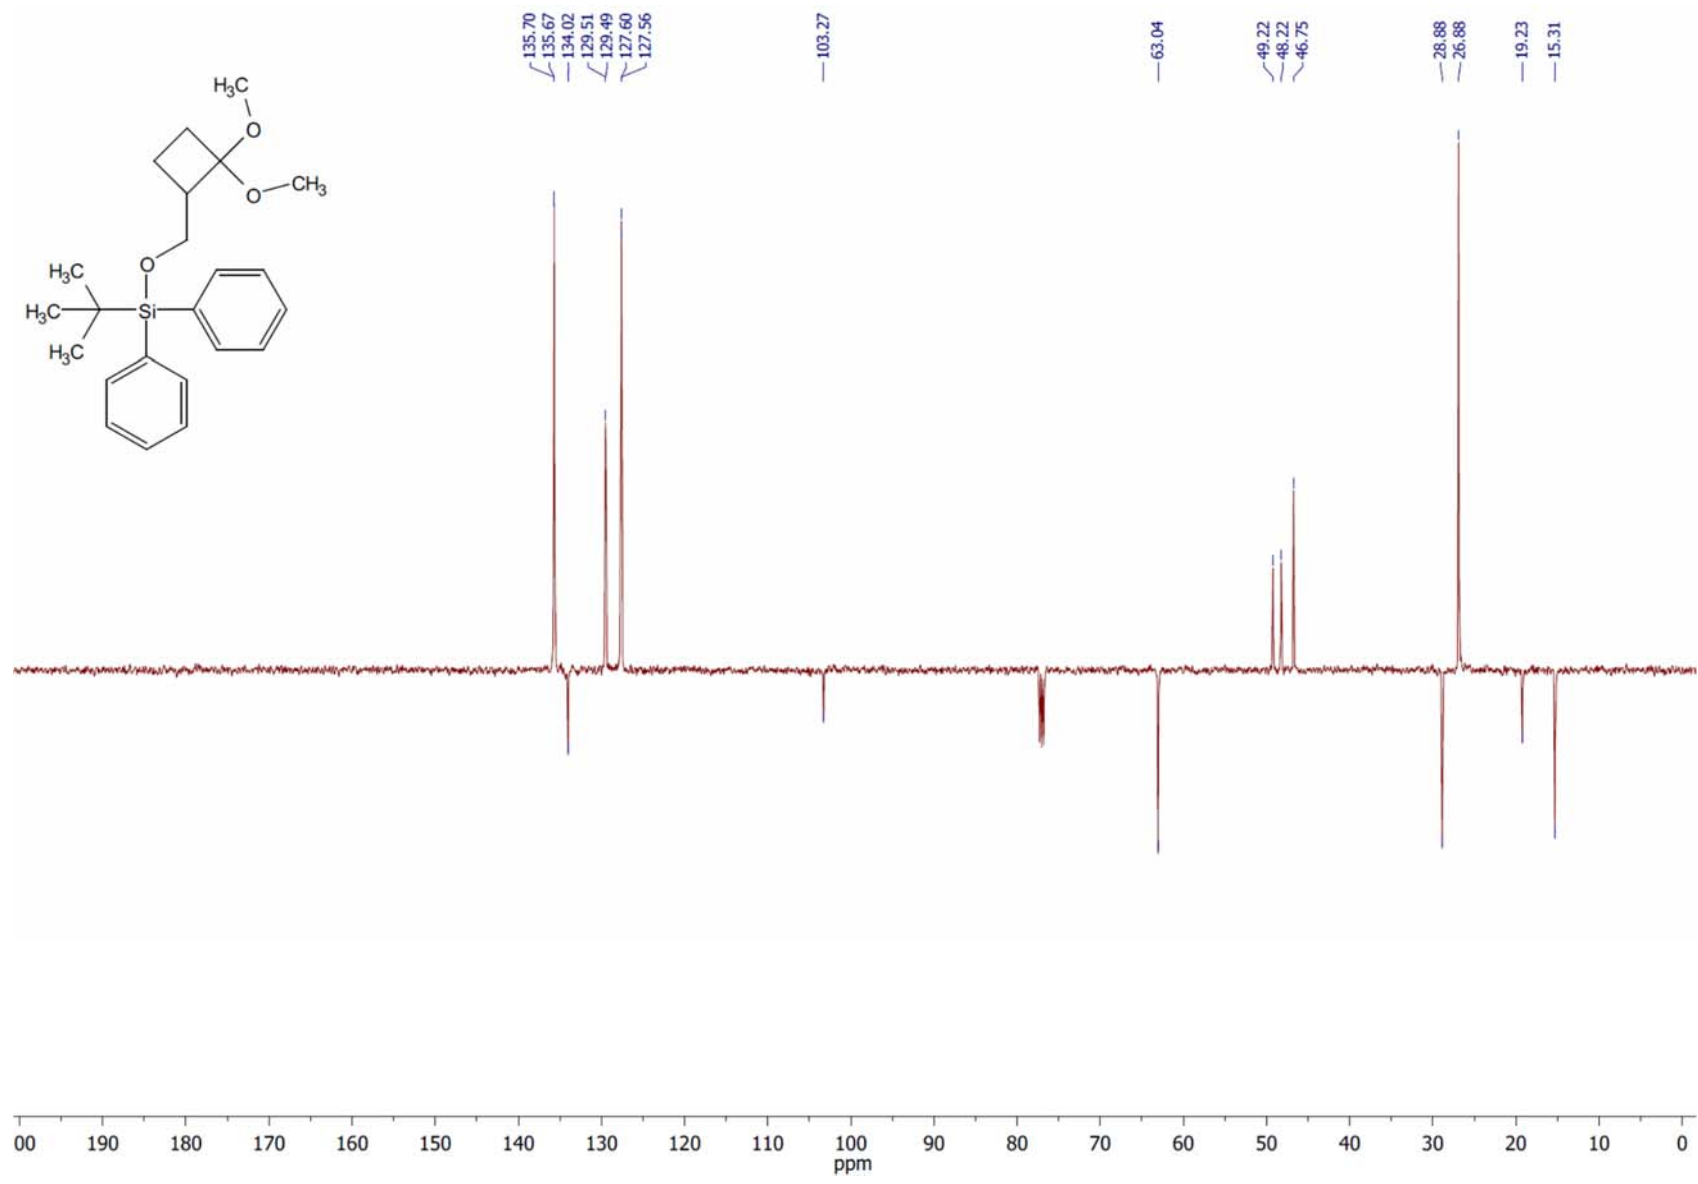

<sup>1</sup>H NMR spectrum of compound **40**

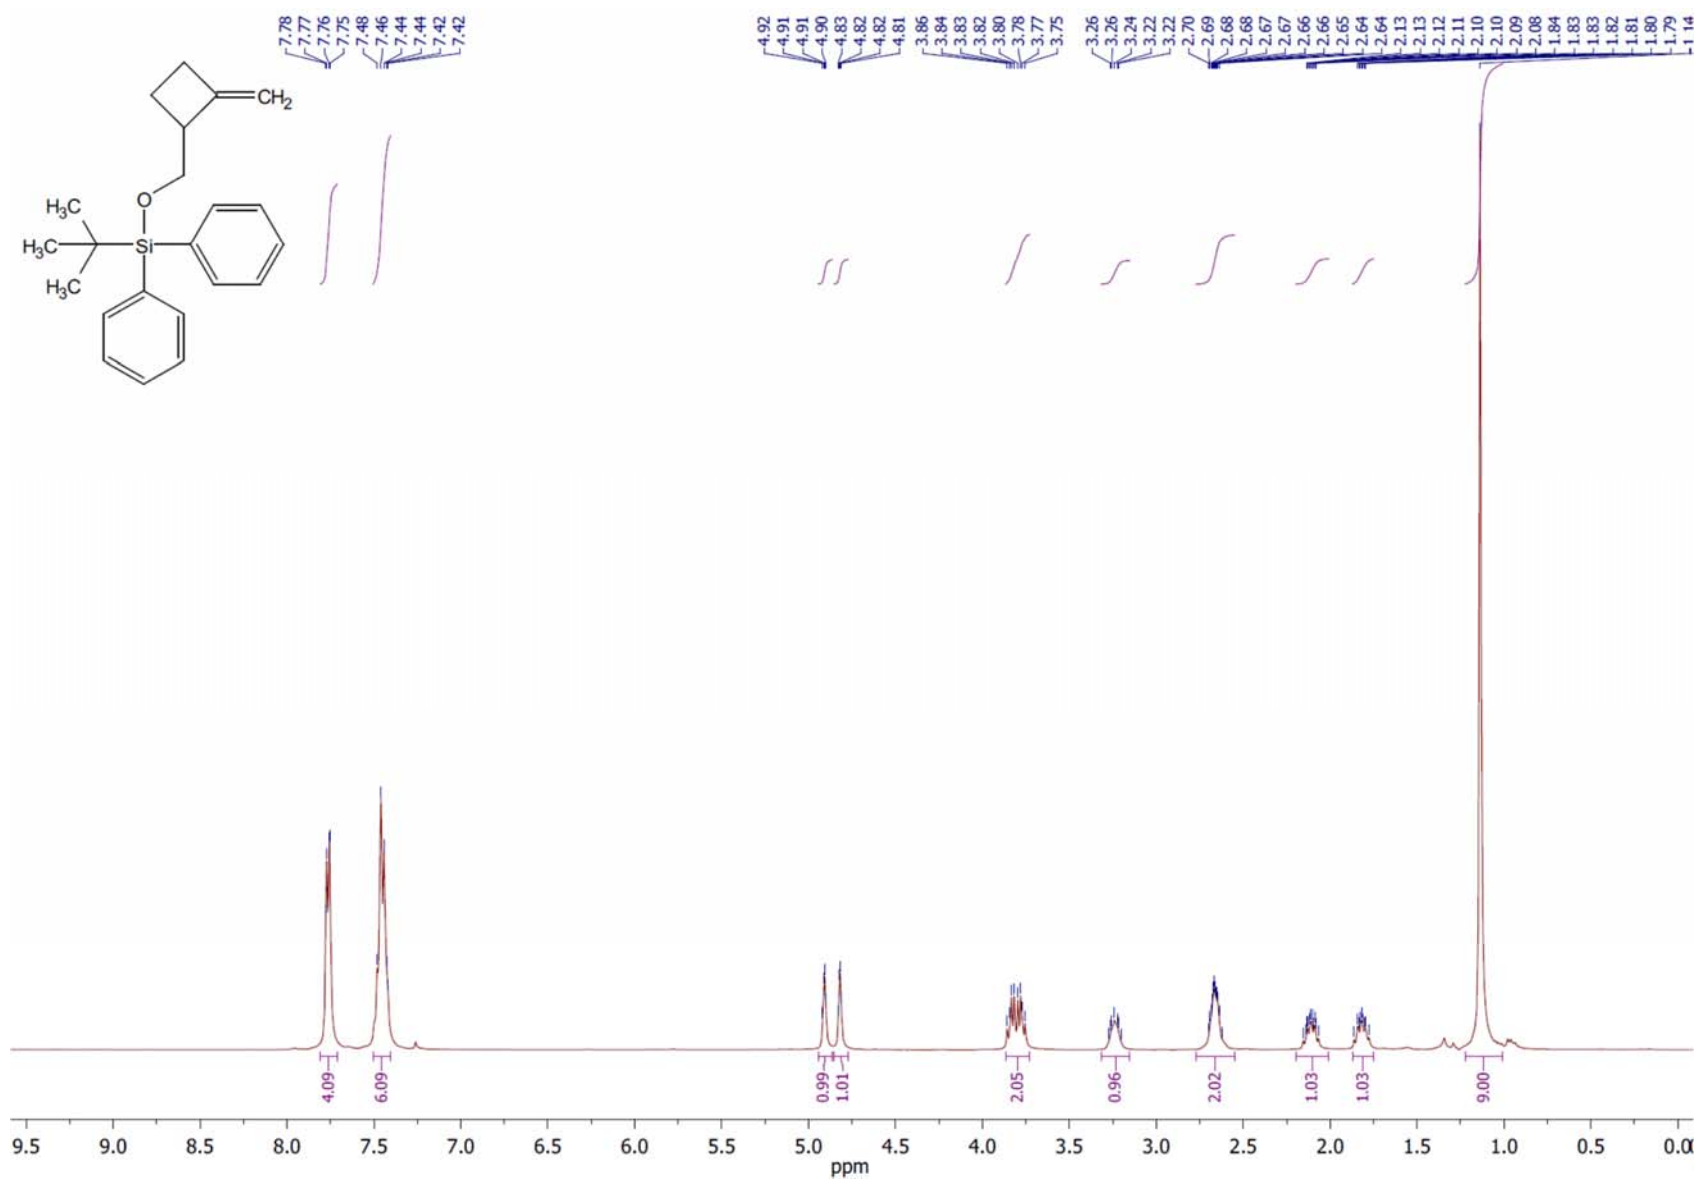

APT  $^{13}\text{C}\{^1\text{H}\}$  NMR spectrum of compound **40**

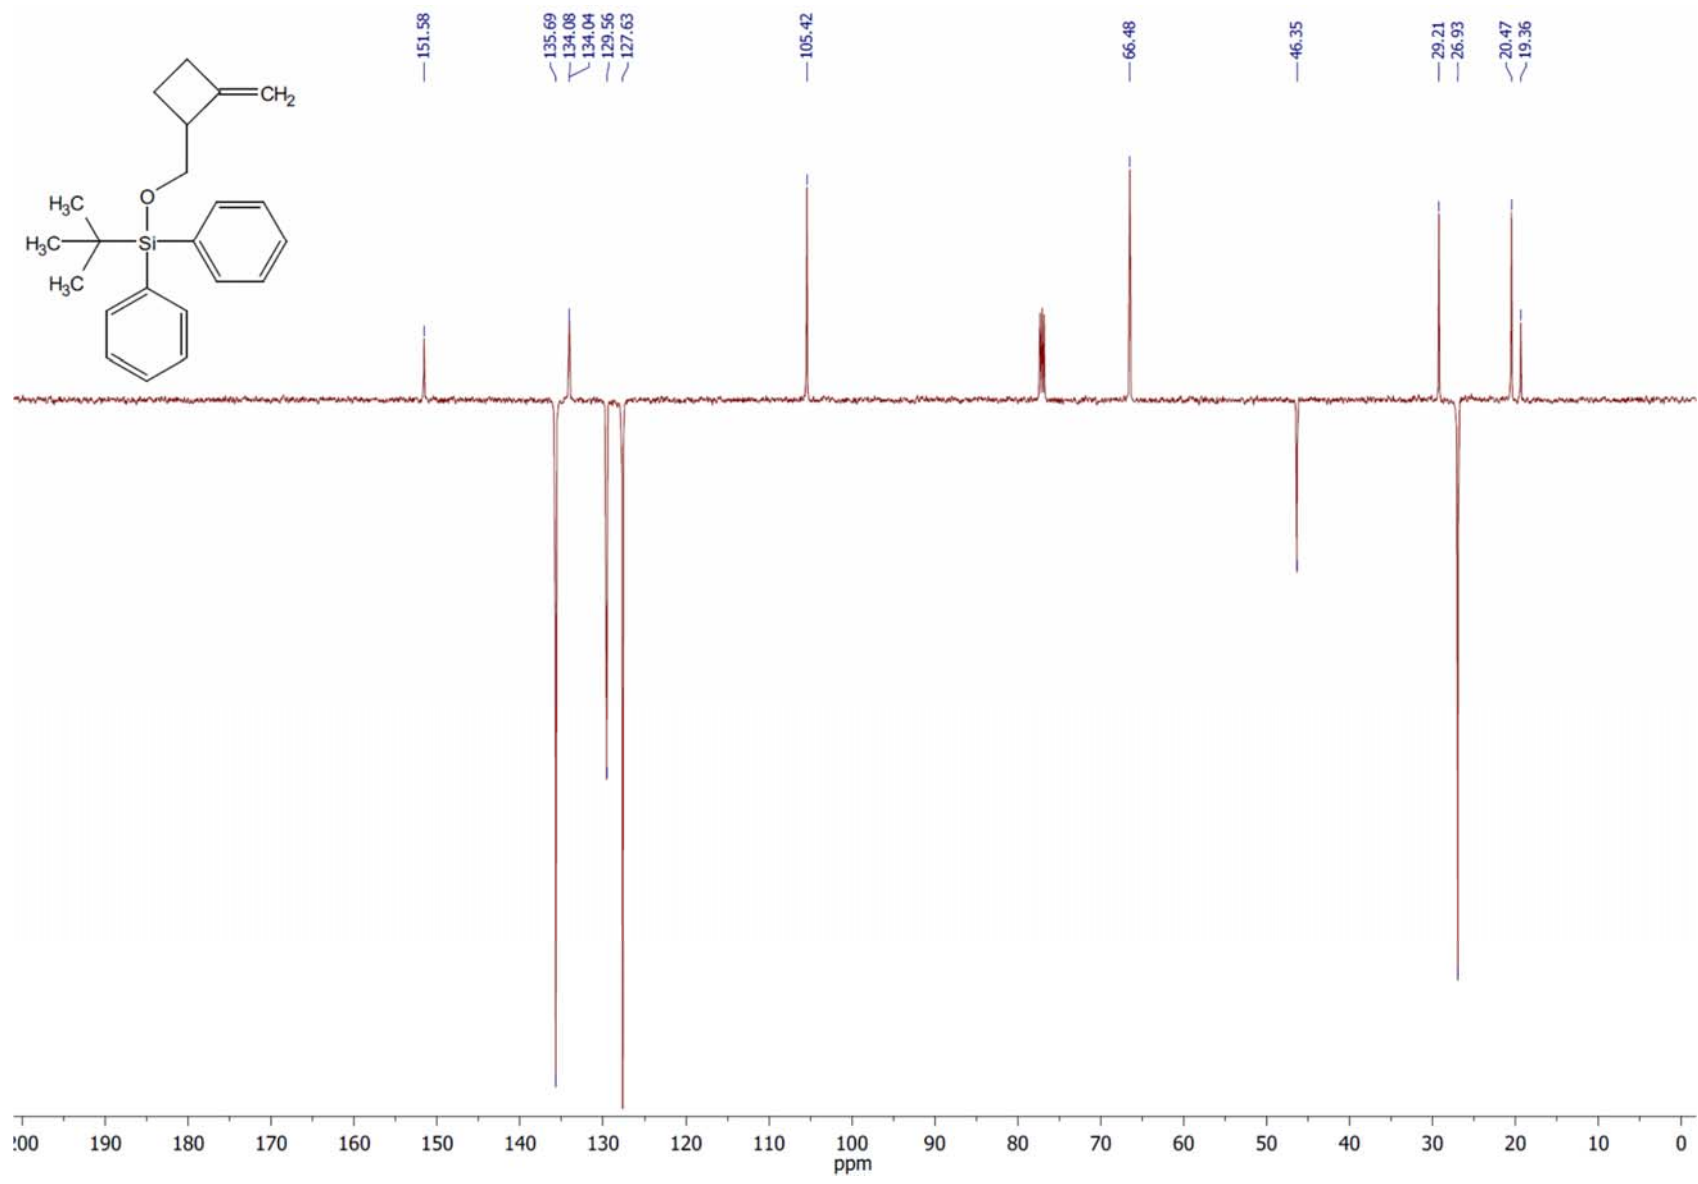

<sup>1</sup>H NMR spectrum of compound 41

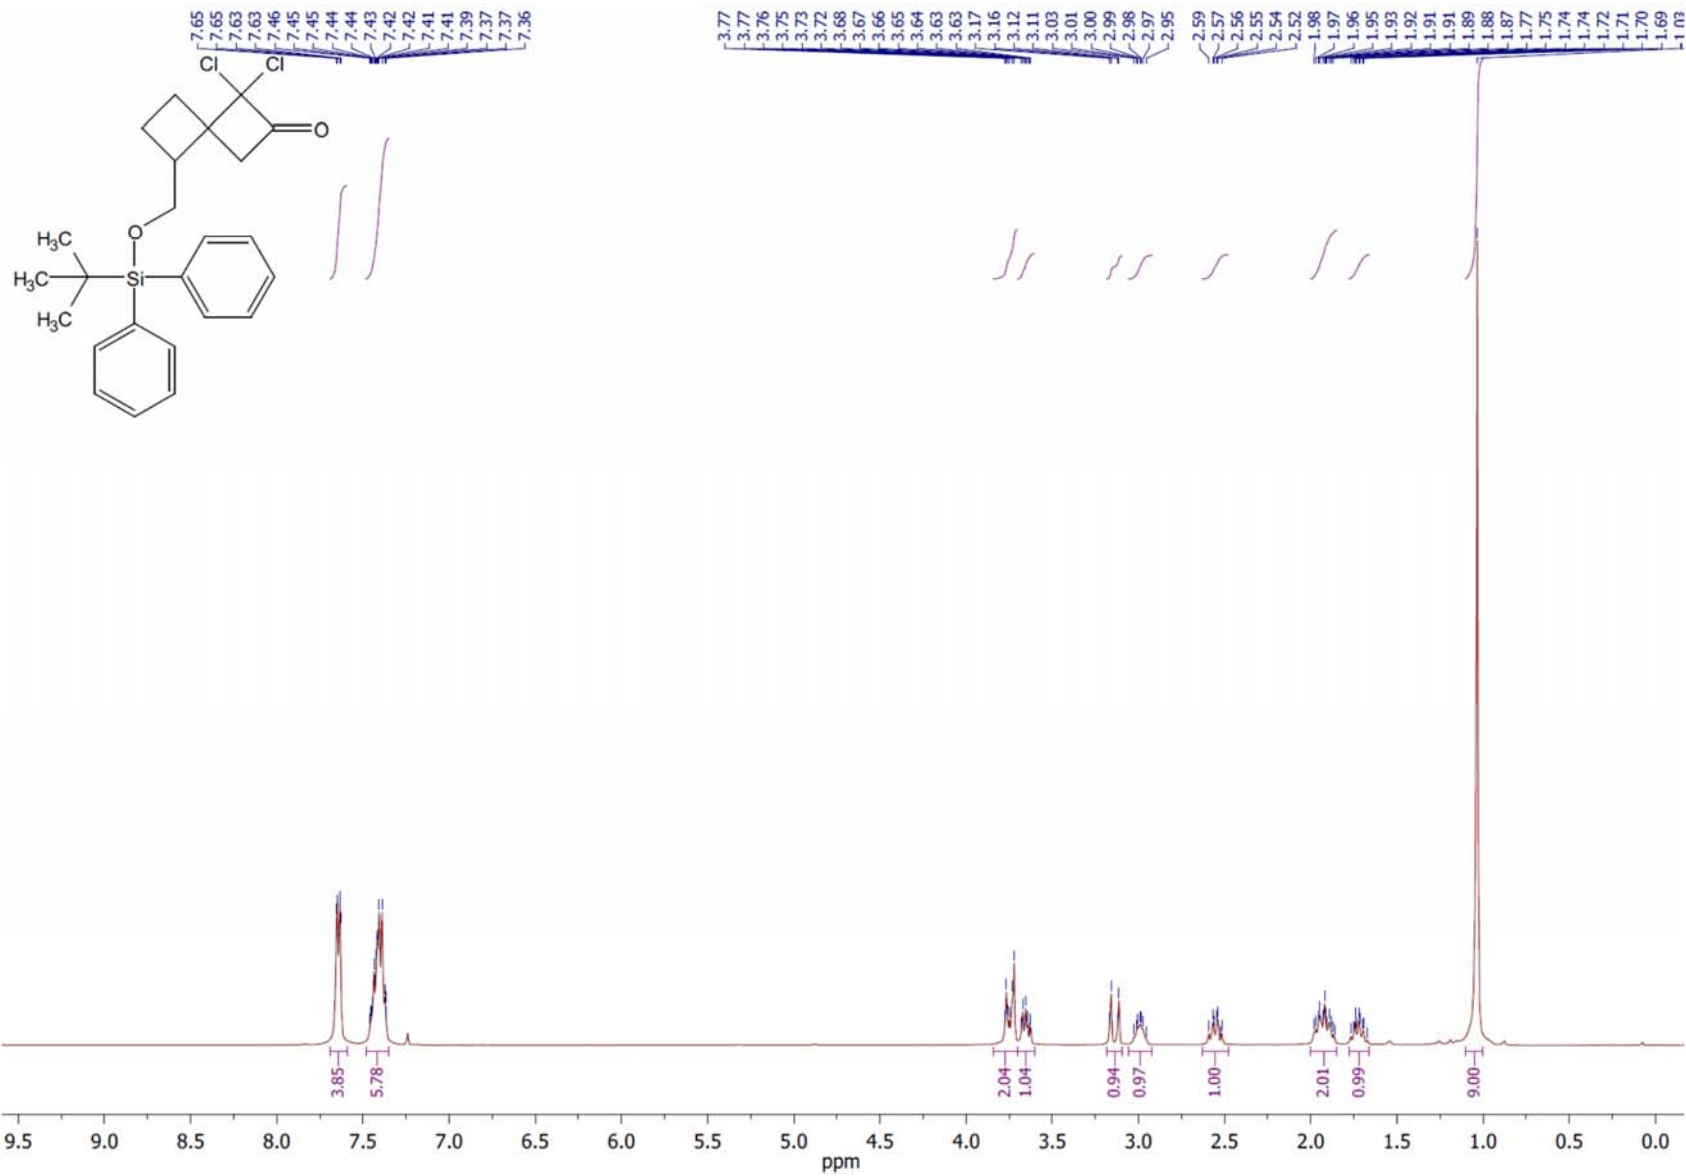



APT  $^{13}\text{C}\{^1\text{H}\}$  NMR spectrum of compound **41**

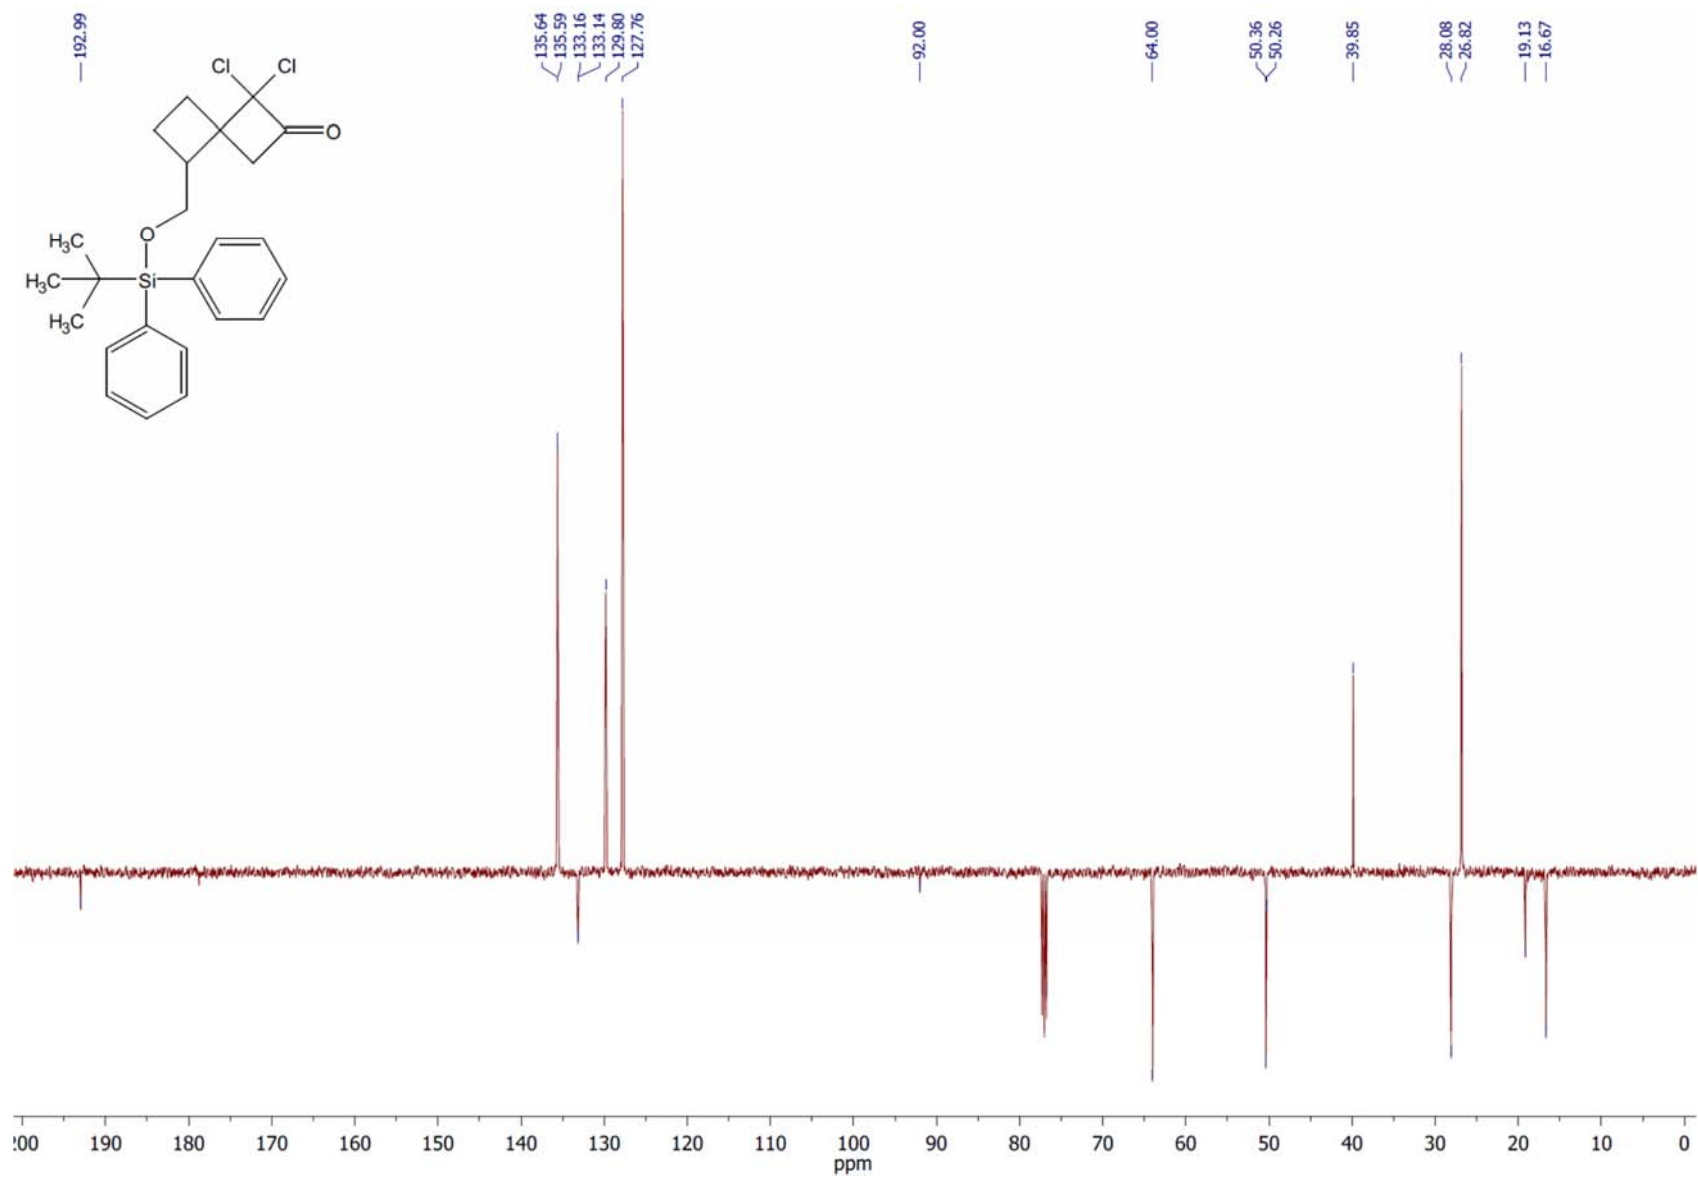

<sup>1</sup>H NMR spectrum of compound **42**

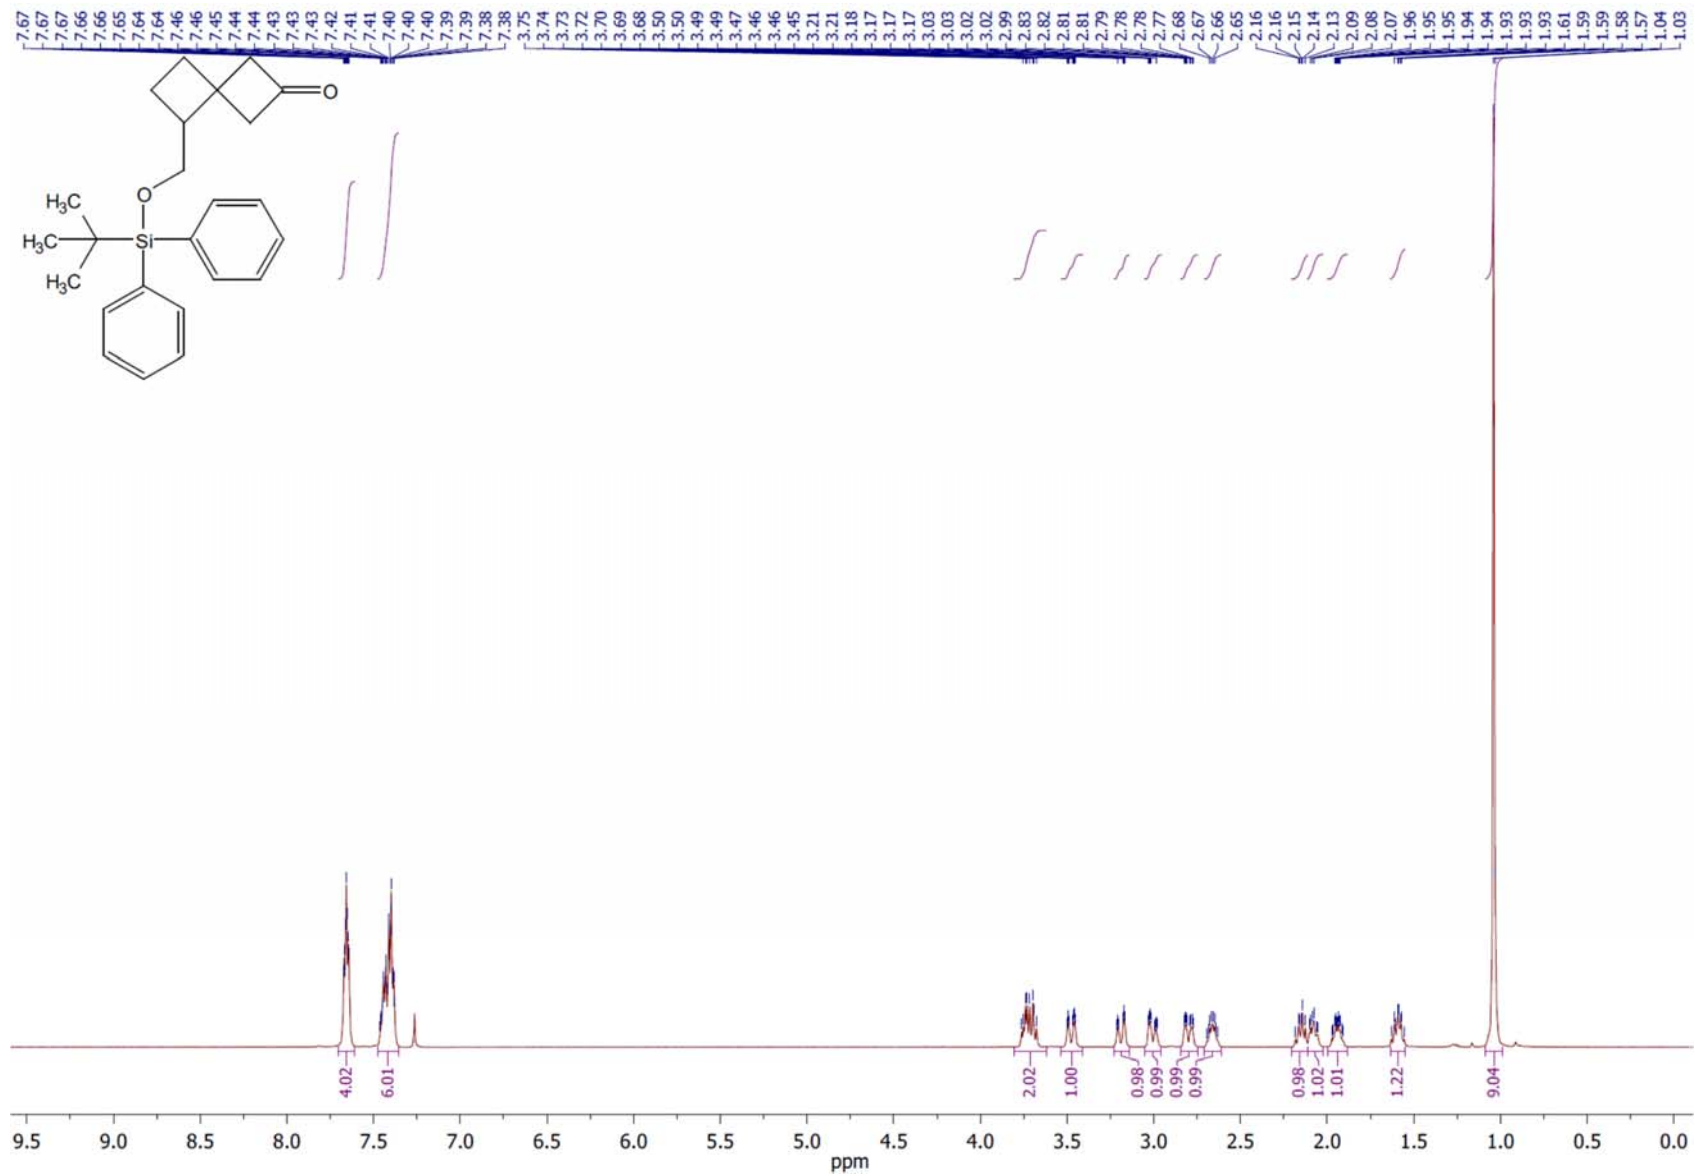

APT  $^{13}\text{C}\{^1\text{H}\}$  NMR spectrum of compound **42**

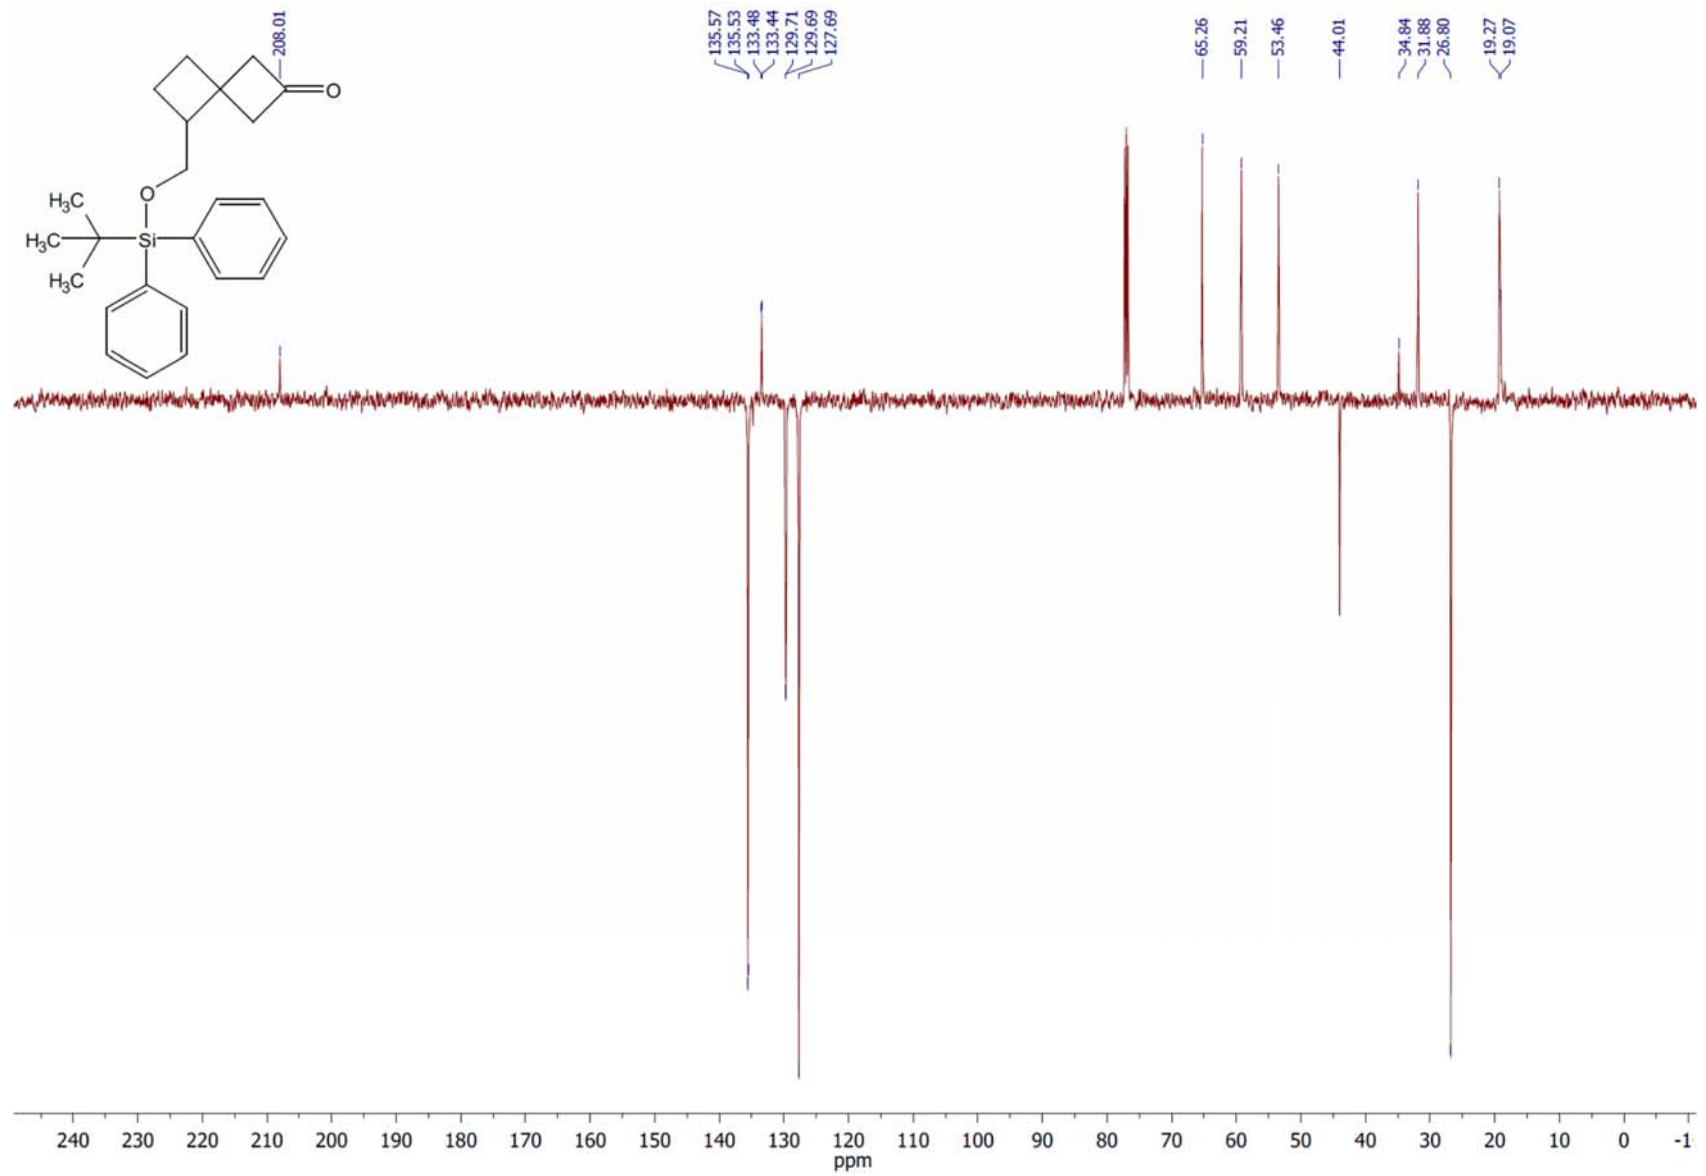

<sup>1</sup>H NMR spectrum of compound **43**

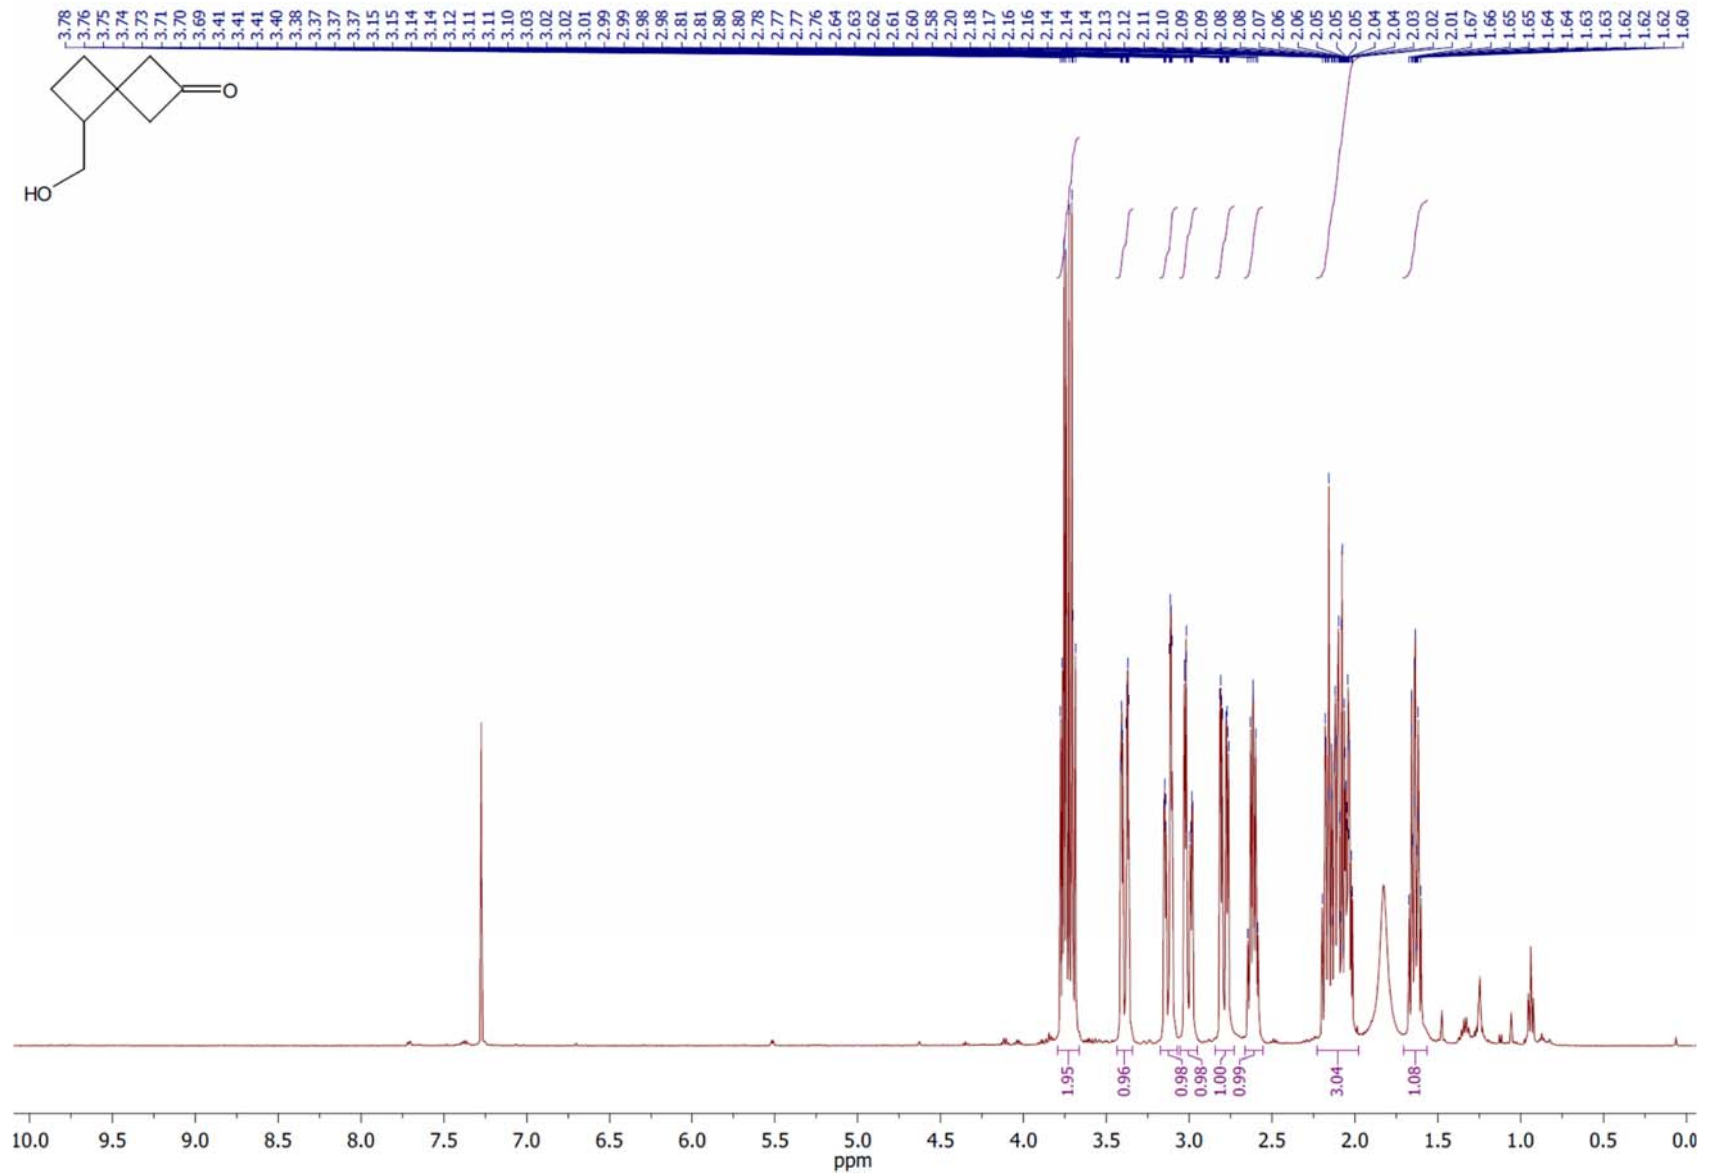

APT  $^{13}\text{C}\{^1\text{H}\}$  NMR spectrum of compound **43**

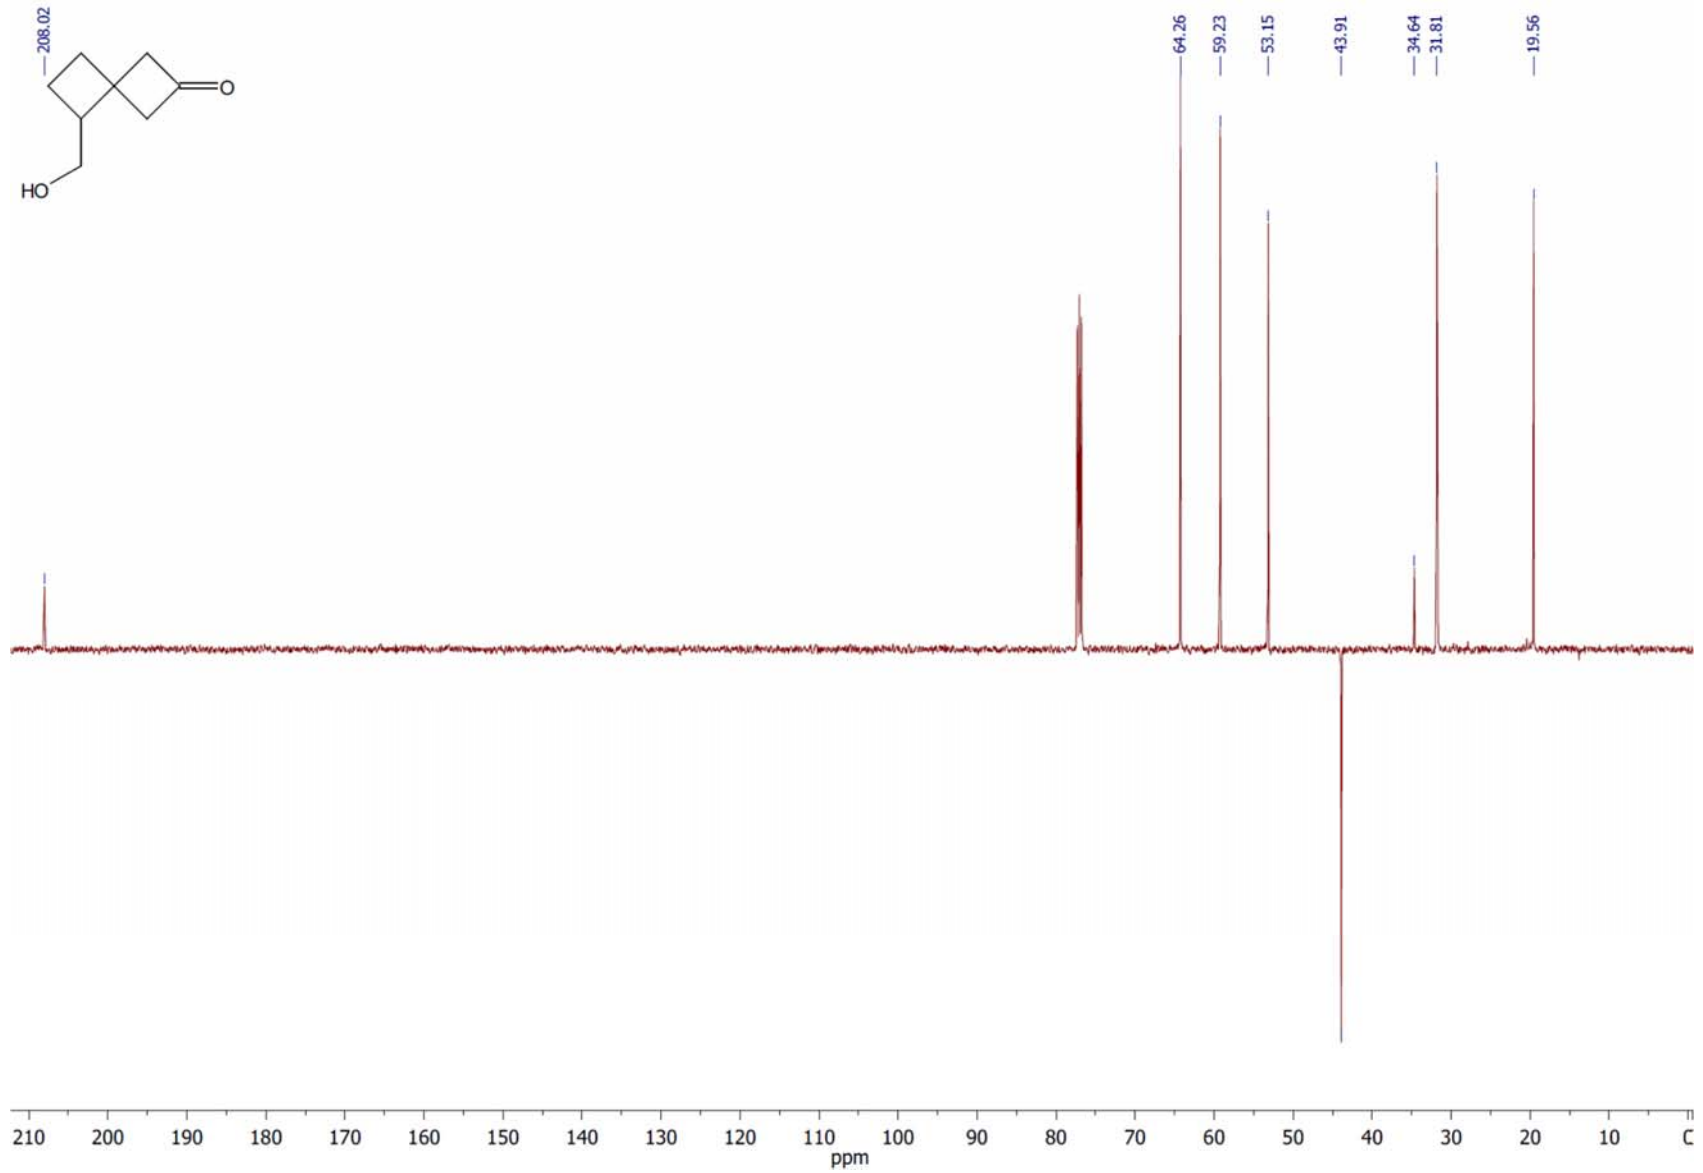

<sup>1</sup>H NMR spectrum of compound **45**

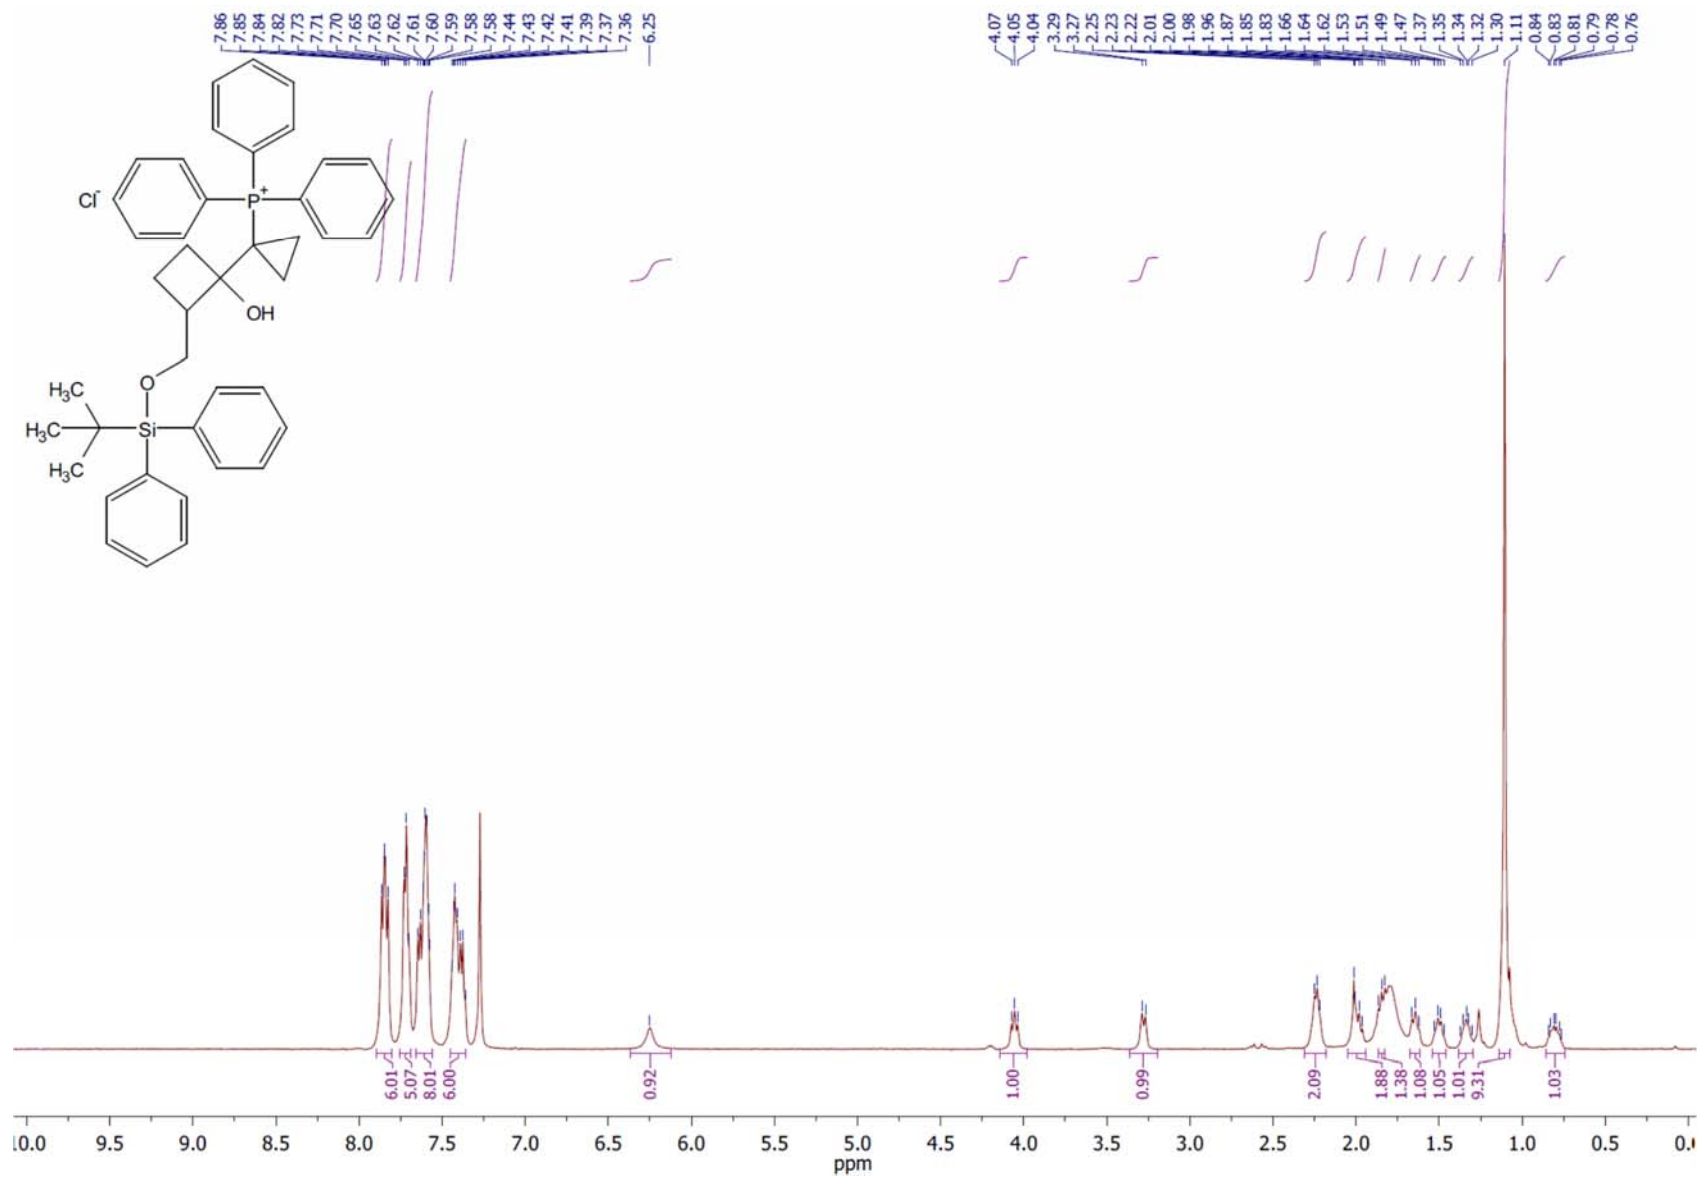

APT  $^{13}\text{C}\{^1\text{H}\}$  NMR spectrum of compound **45**

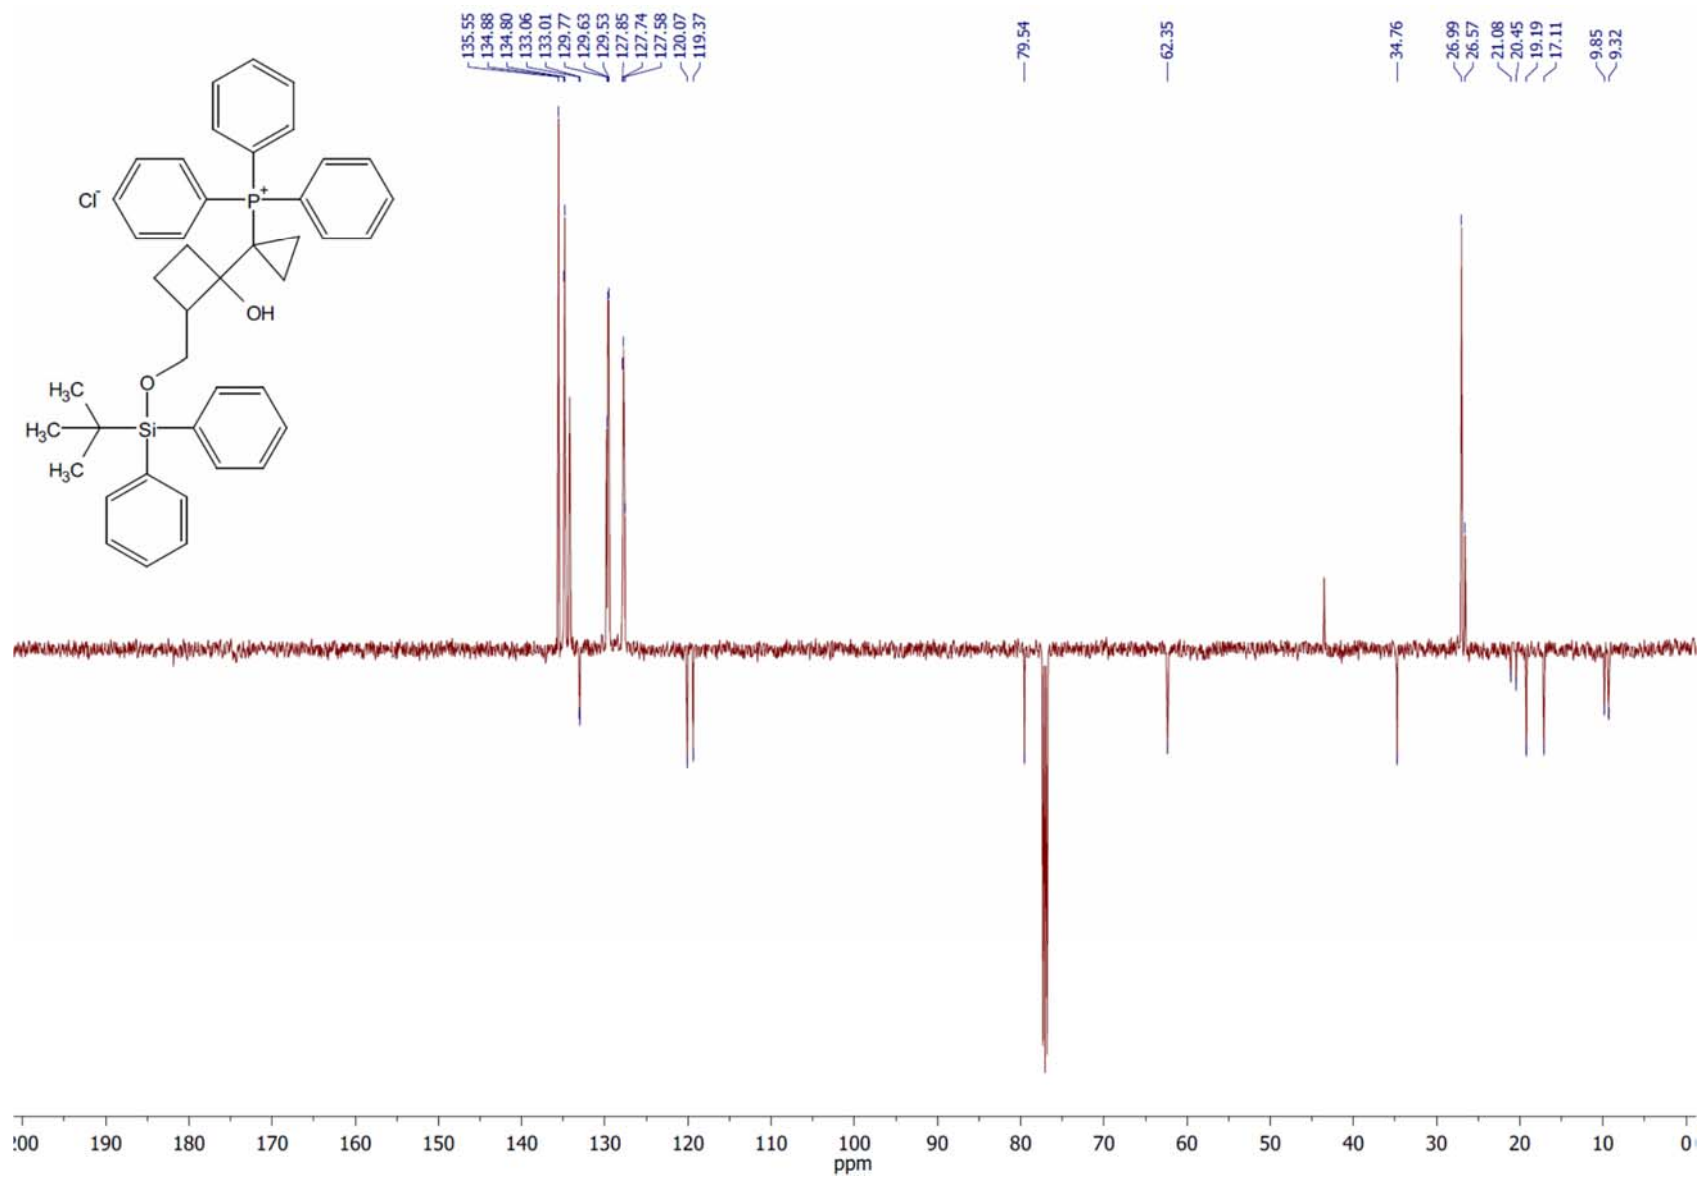

$^{31}\text{P}\{^1\text{H}\}$  NMR spectrum of compound **45**

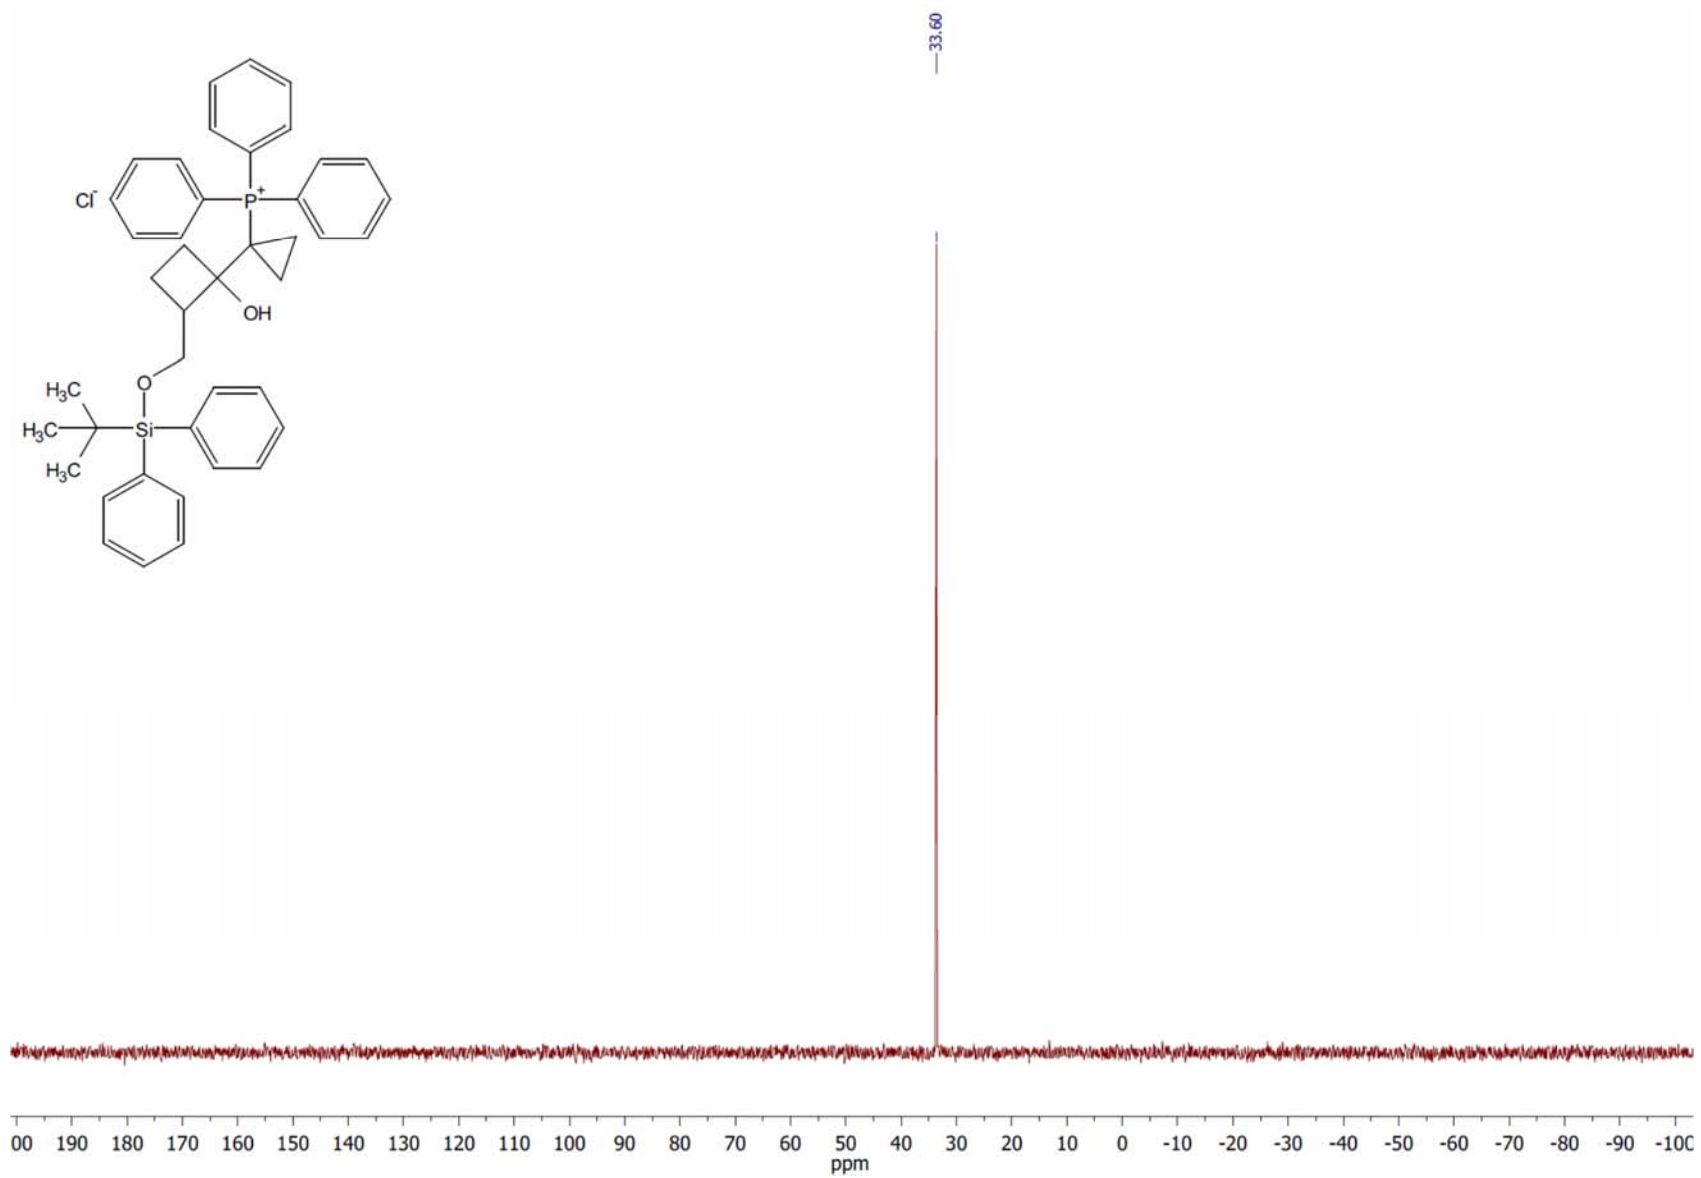



<sup>1</sup>H NMR spectrum of compound **46**

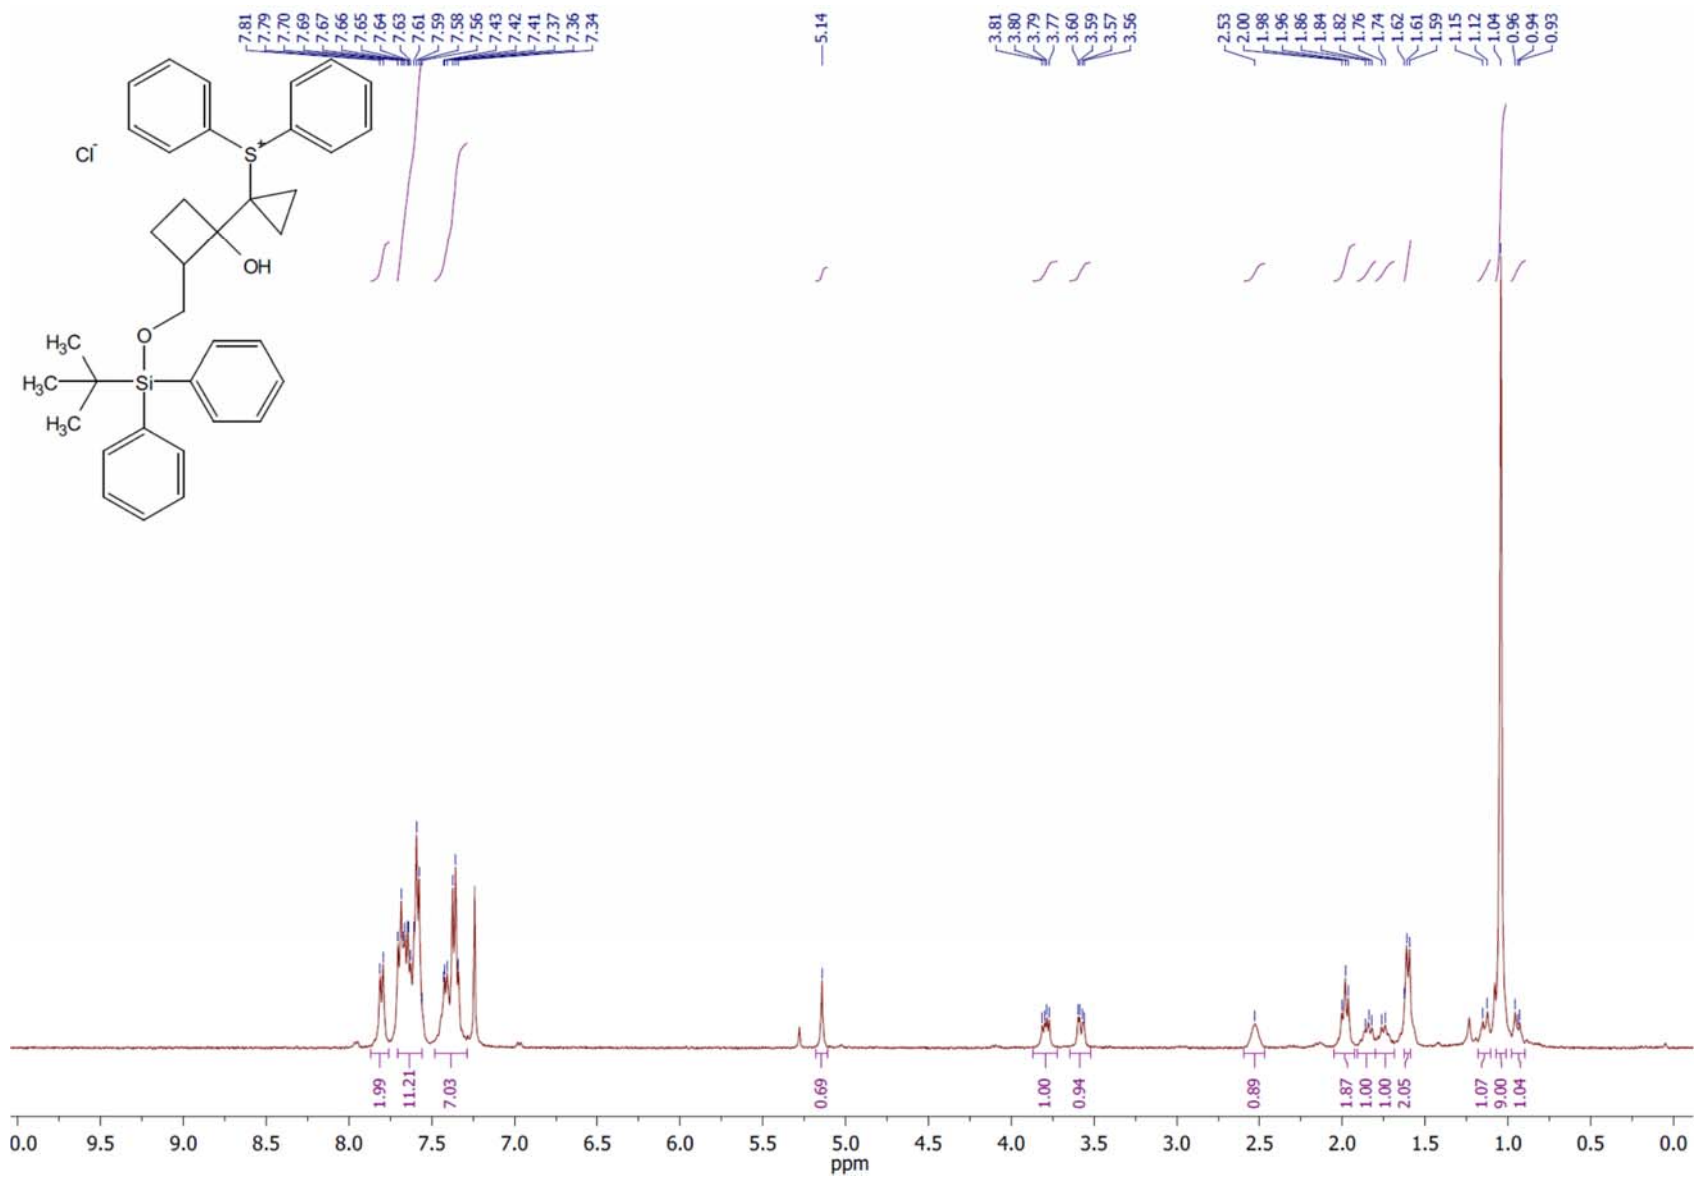

APT  $^{13}\text{C}\{^1\text{H}\}$  NMR spectrum of compound **46**

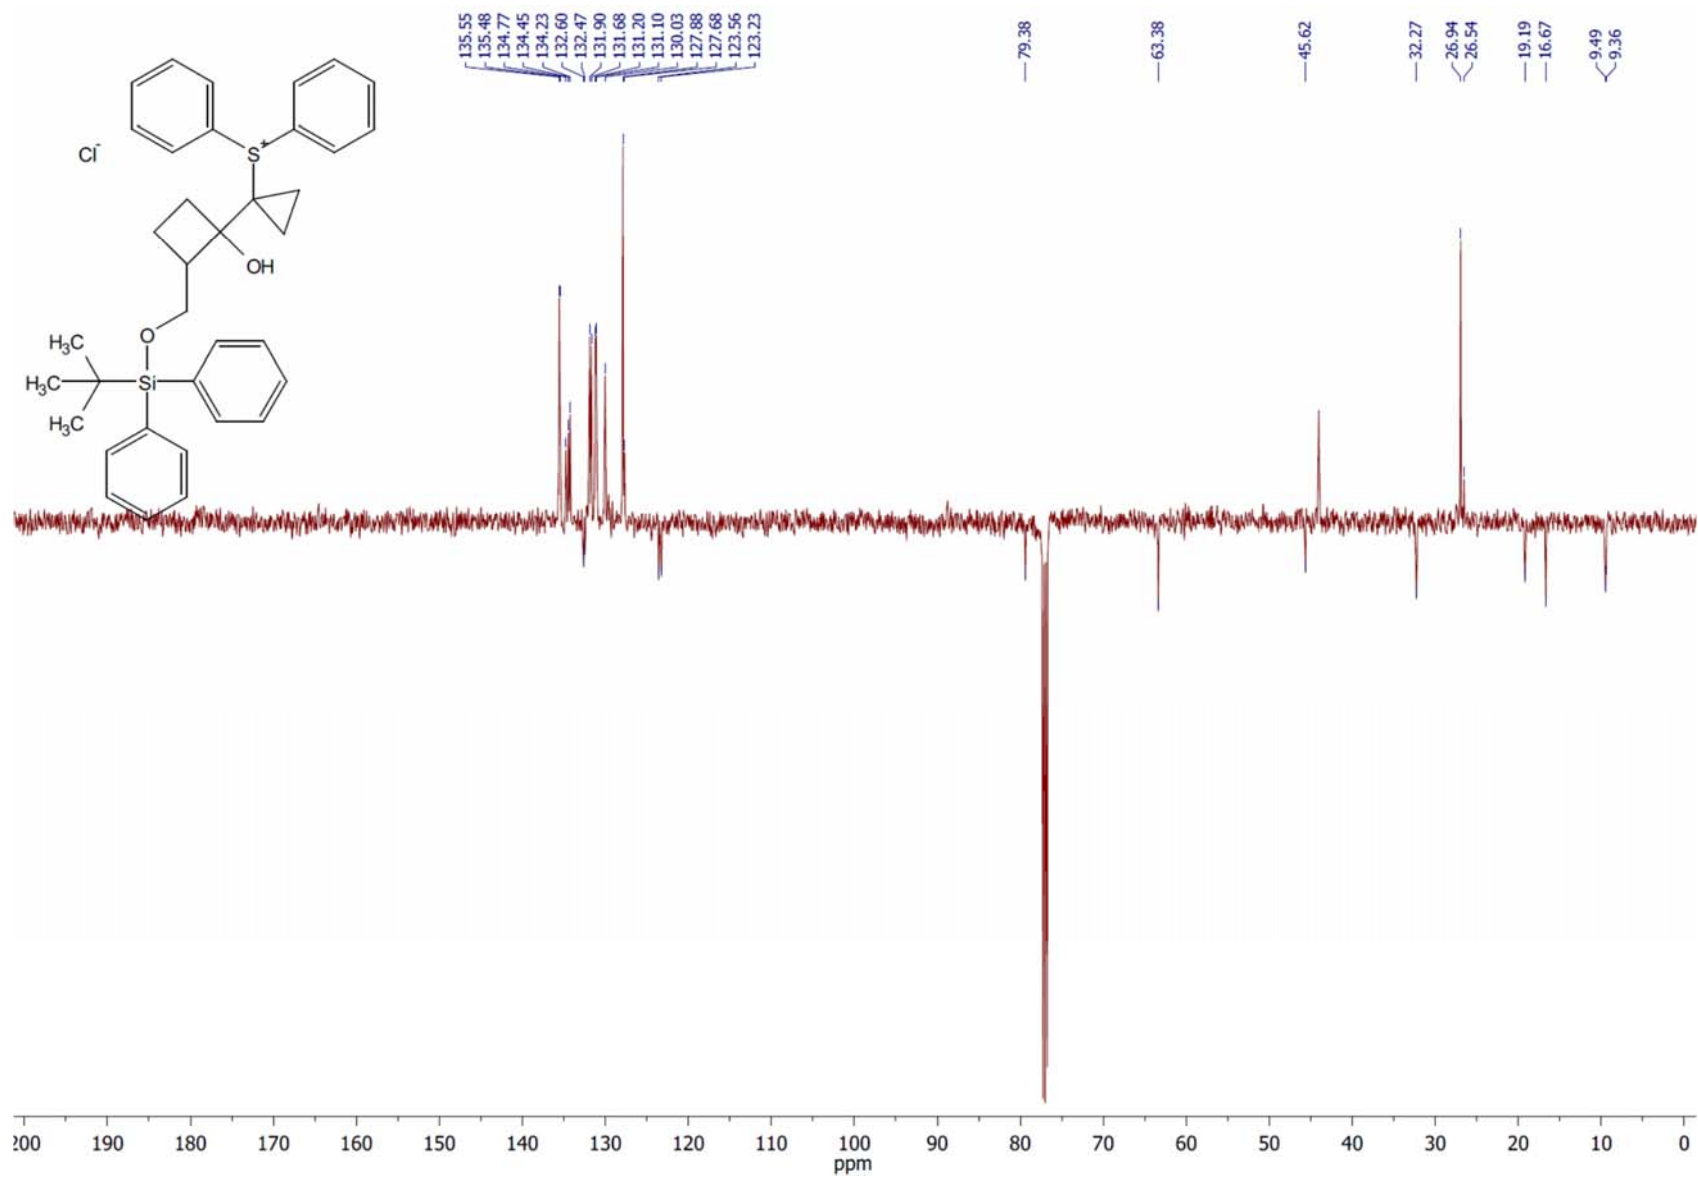

<sup>1</sup>H NMR spectrum of compound 47

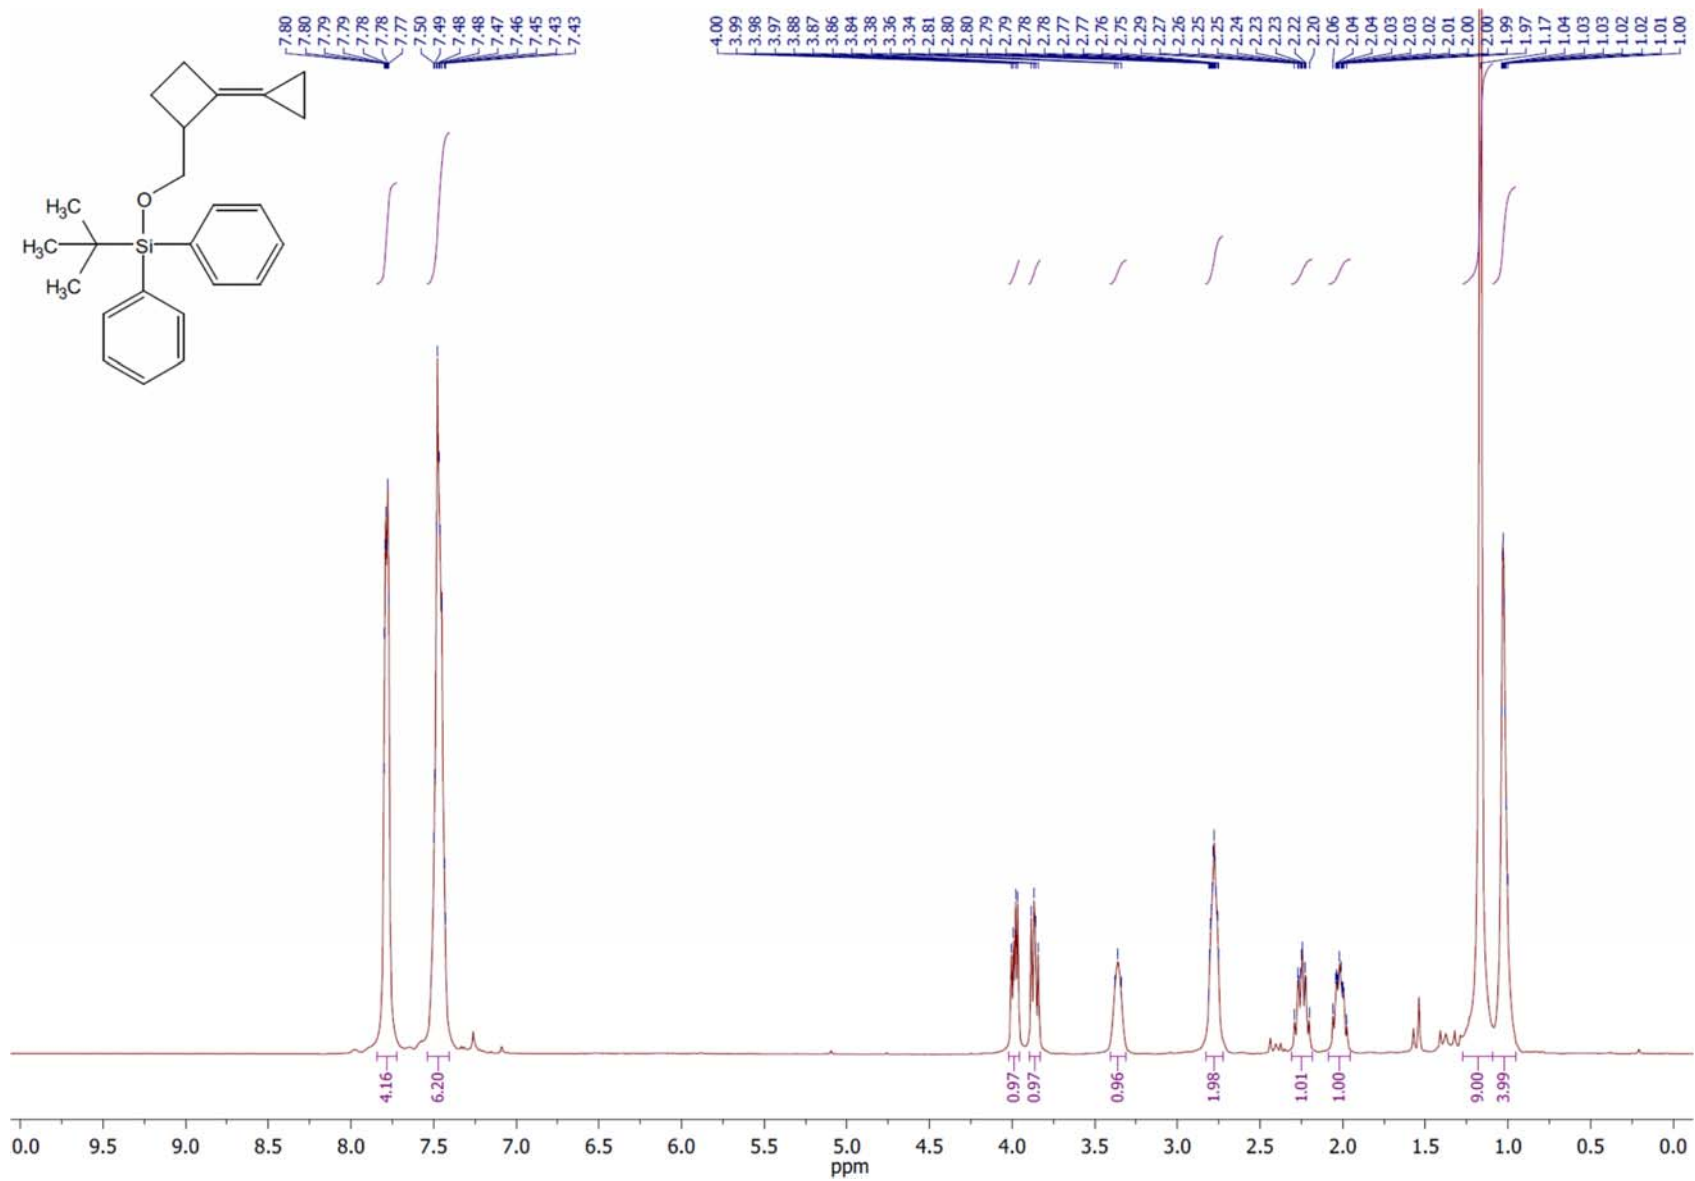

APT  $^{13}\text{C}\{^1\text{H}\}$  NMR spectrum of compound **47**

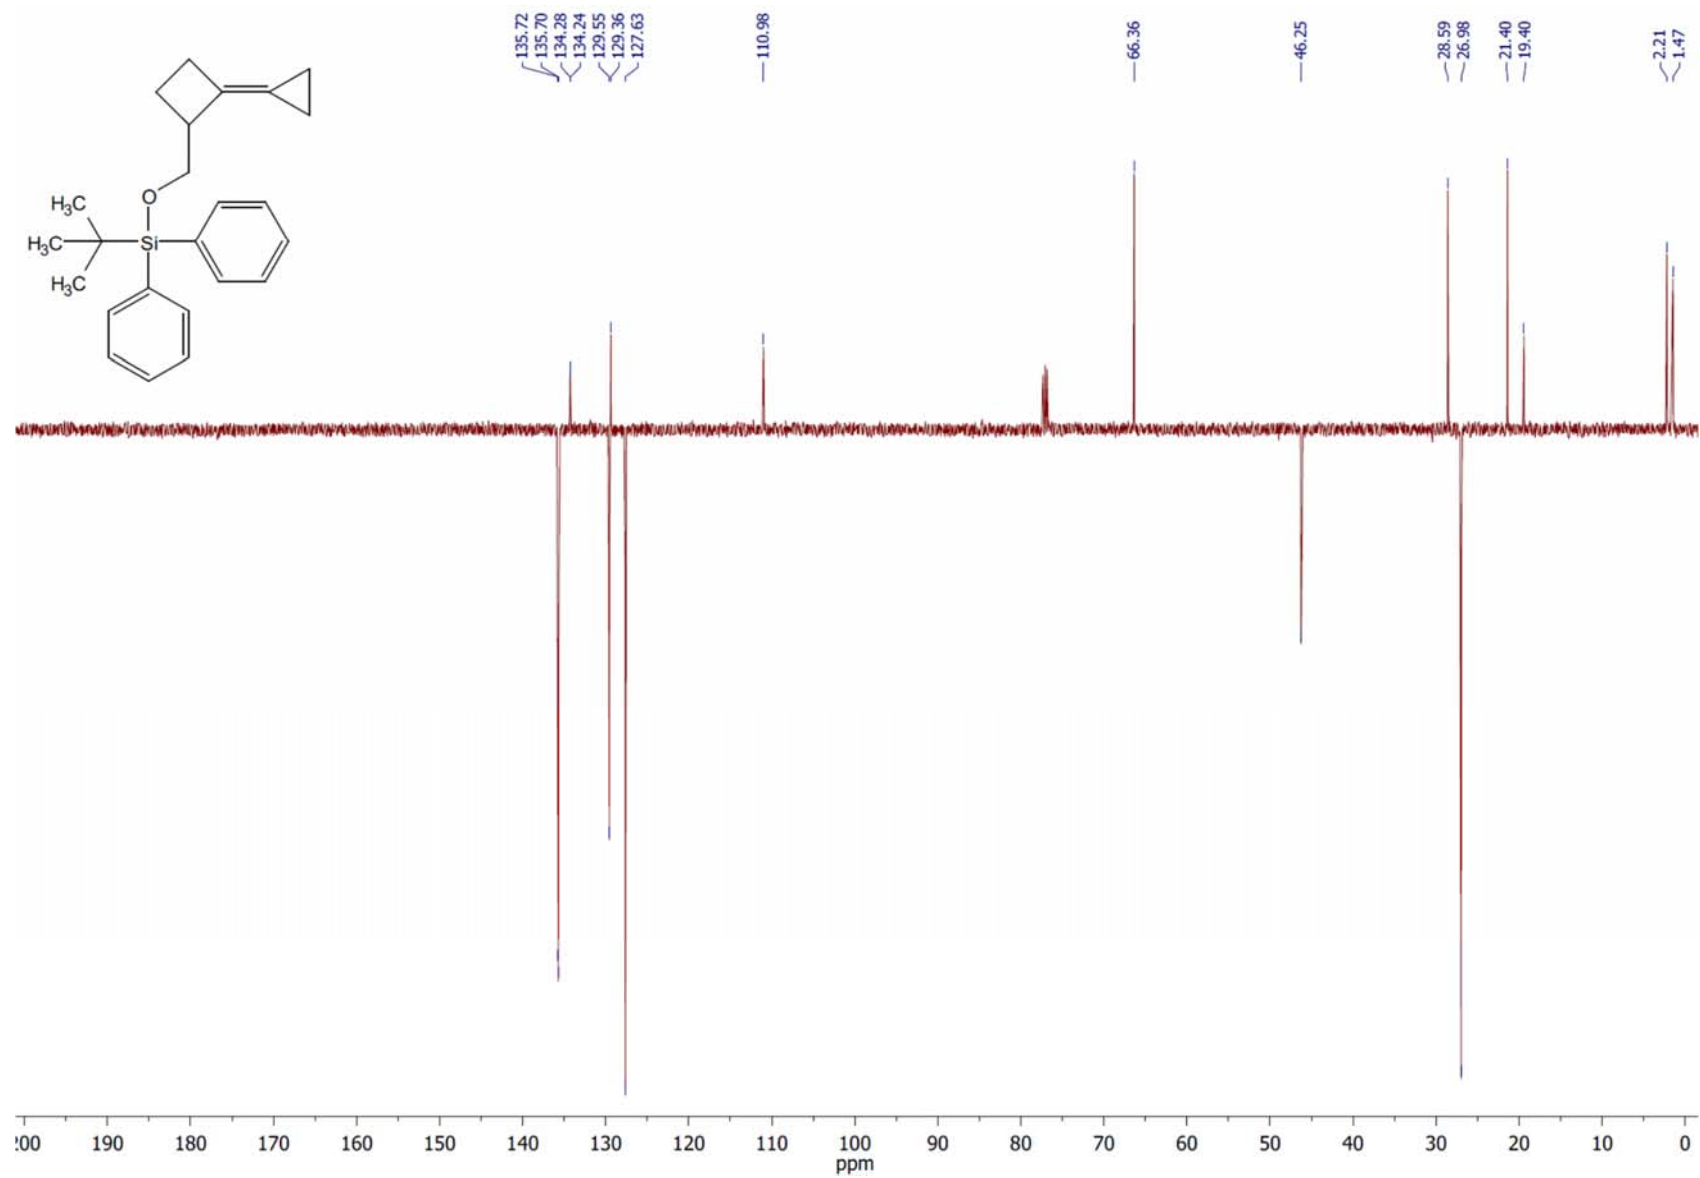

<sup>1</sup>H NMR spectrum of compound **48a**

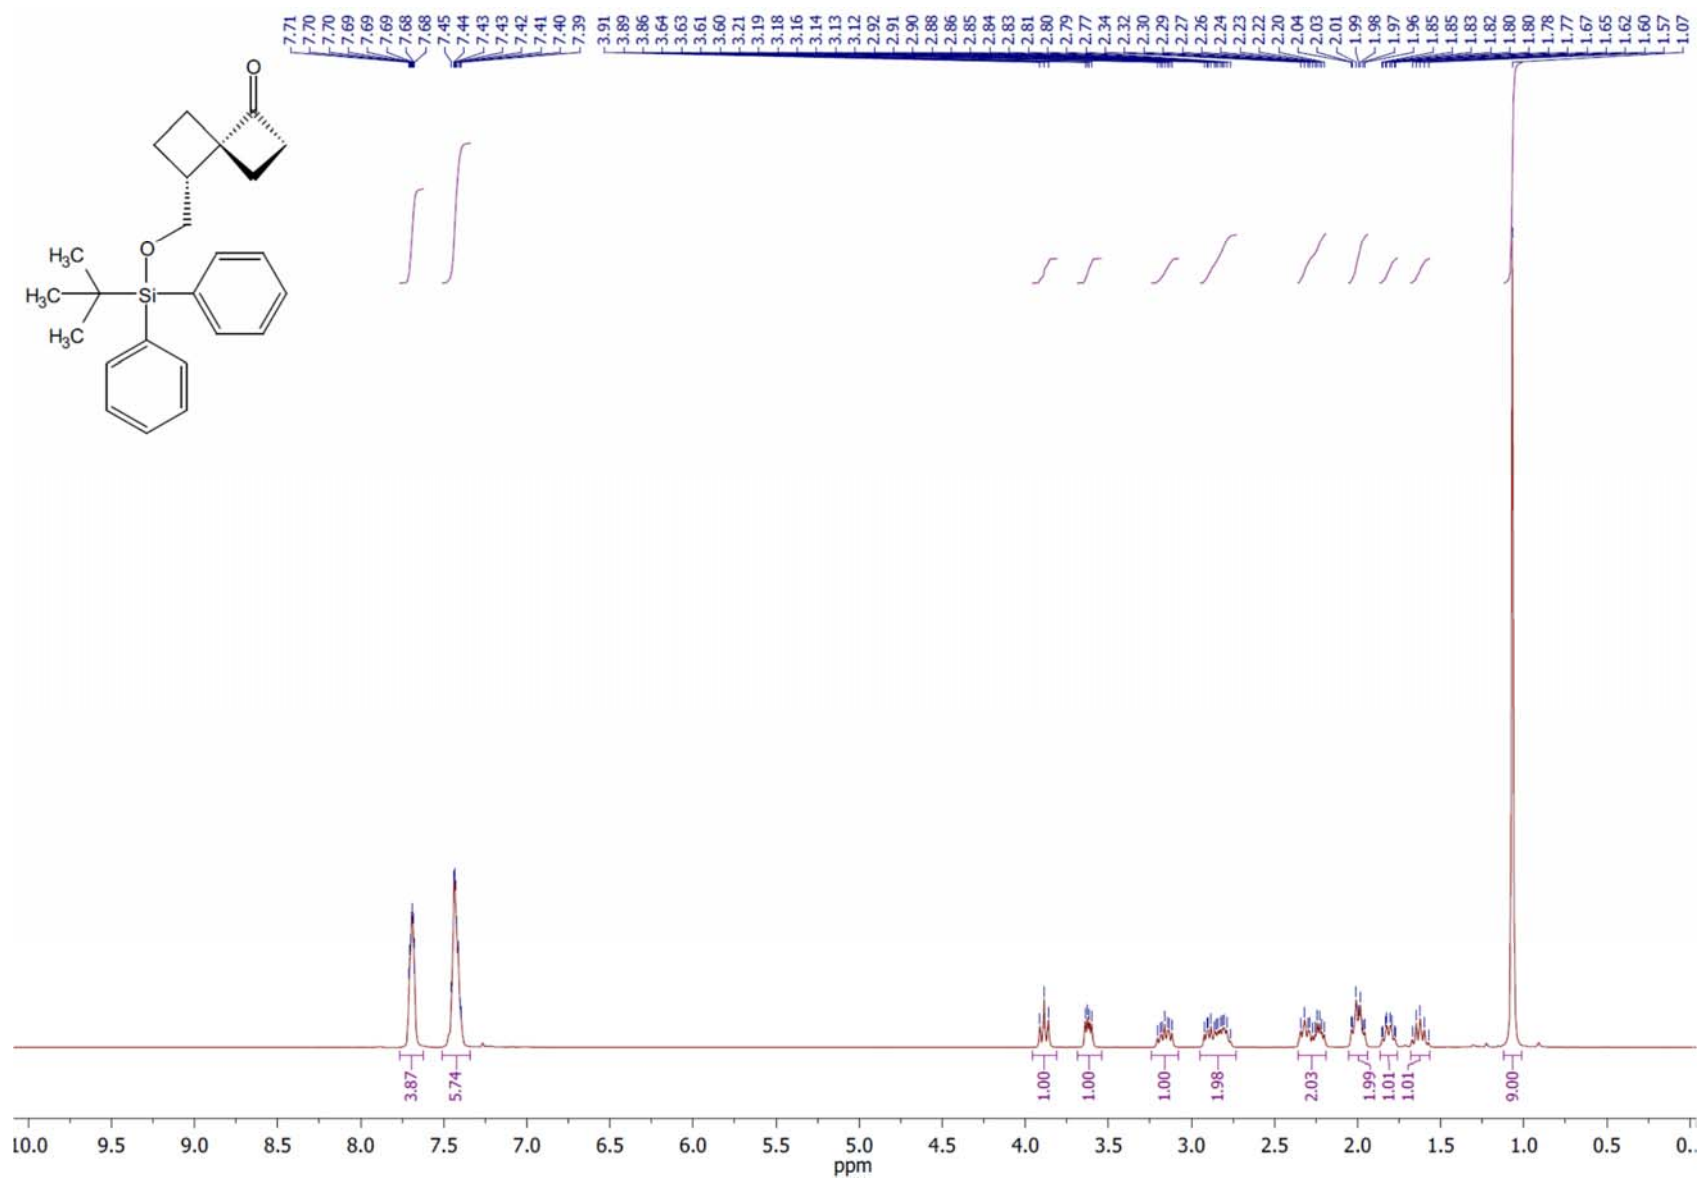

APT  $^{13}\text{C}\{^1\text{H}\}$  NMR spectrum of compound **48a**

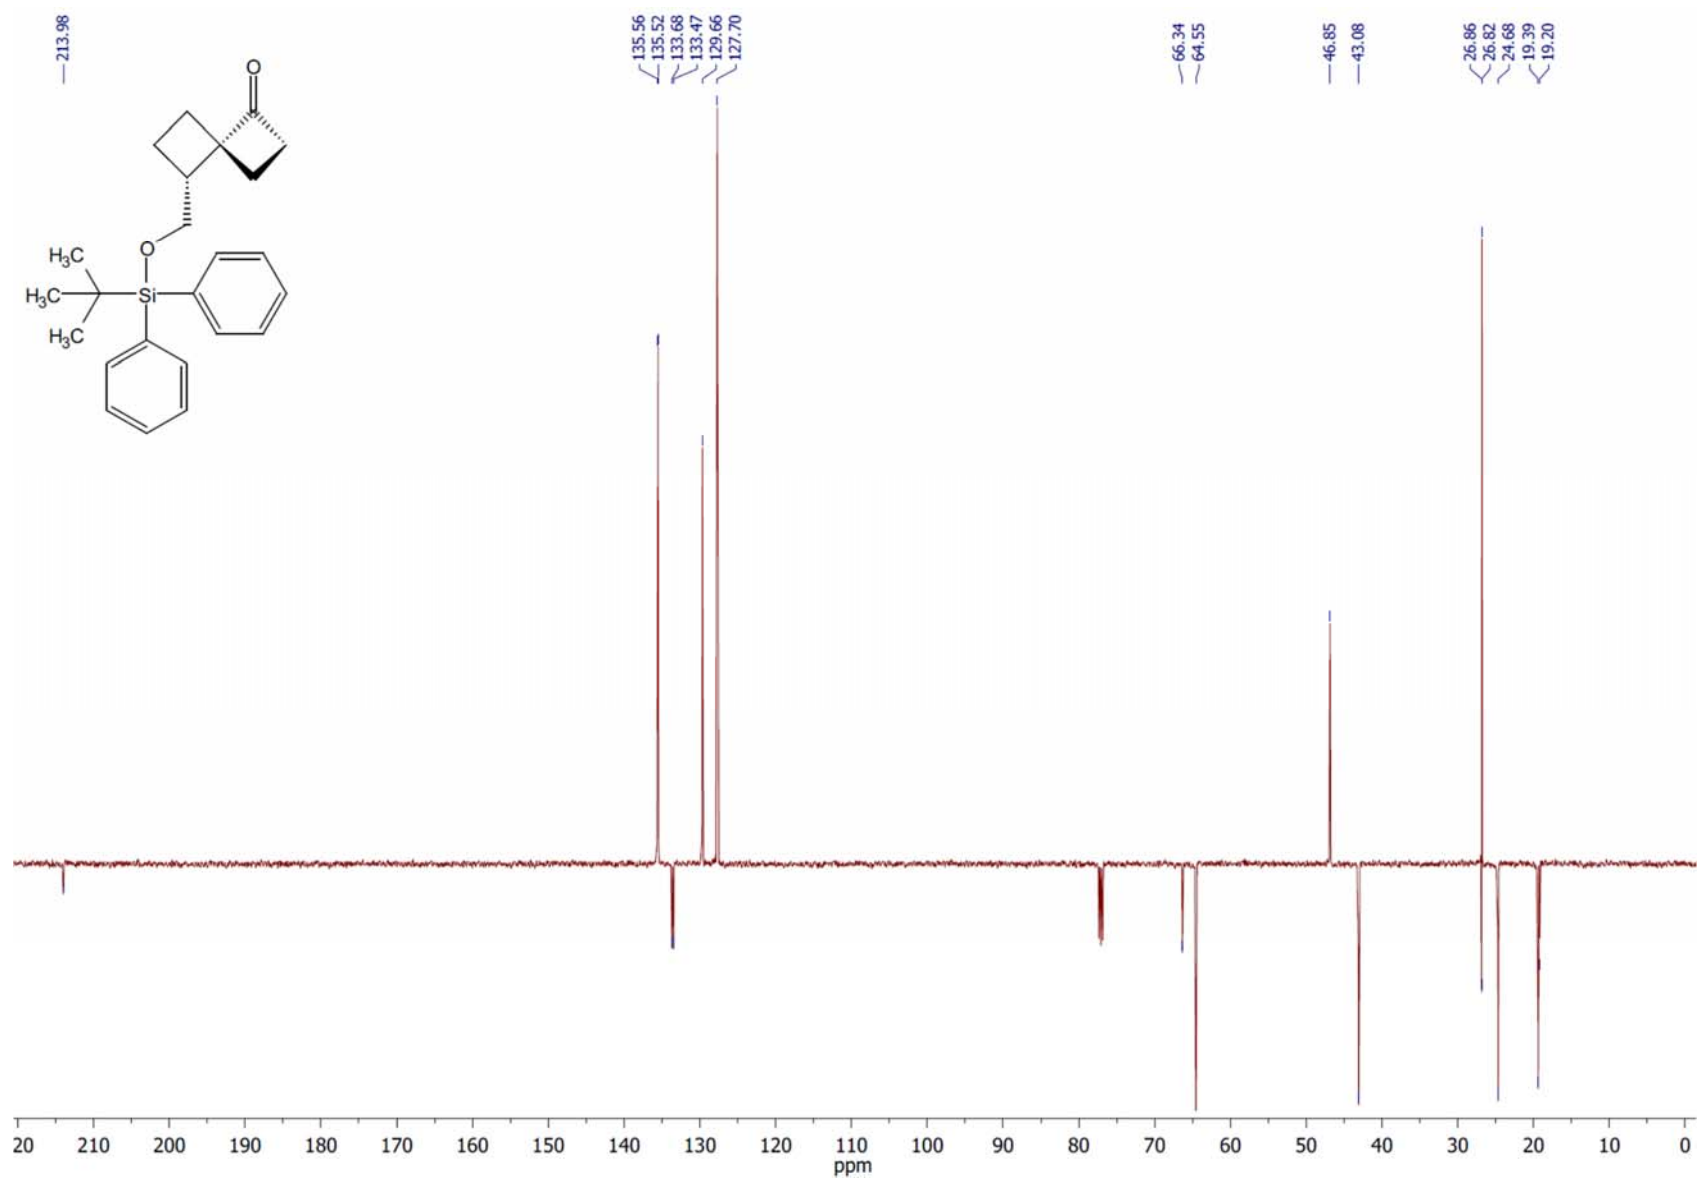

<sup>1</sup>H NMR spectrum of compound **48b**

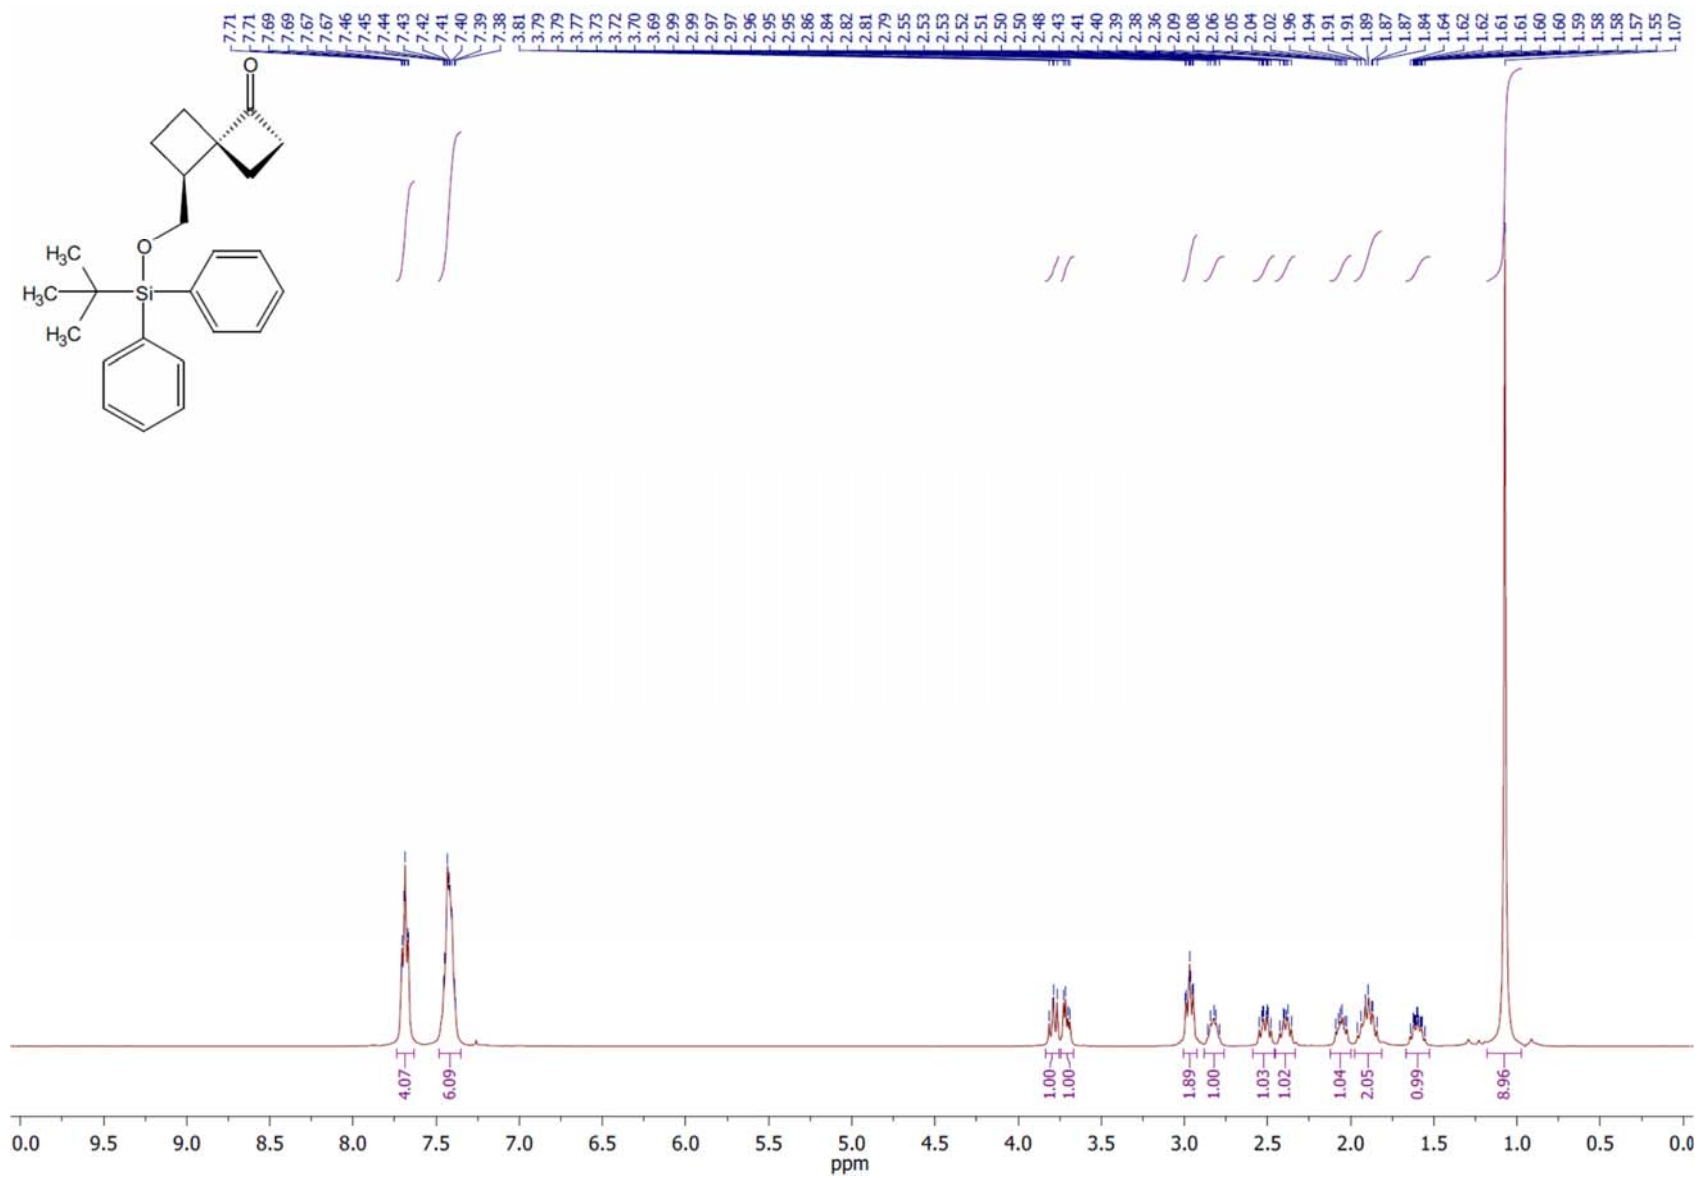

APT  $^{13}\text{C}\{^1\text{H}\}$  NMR spectrum of compound **48b**

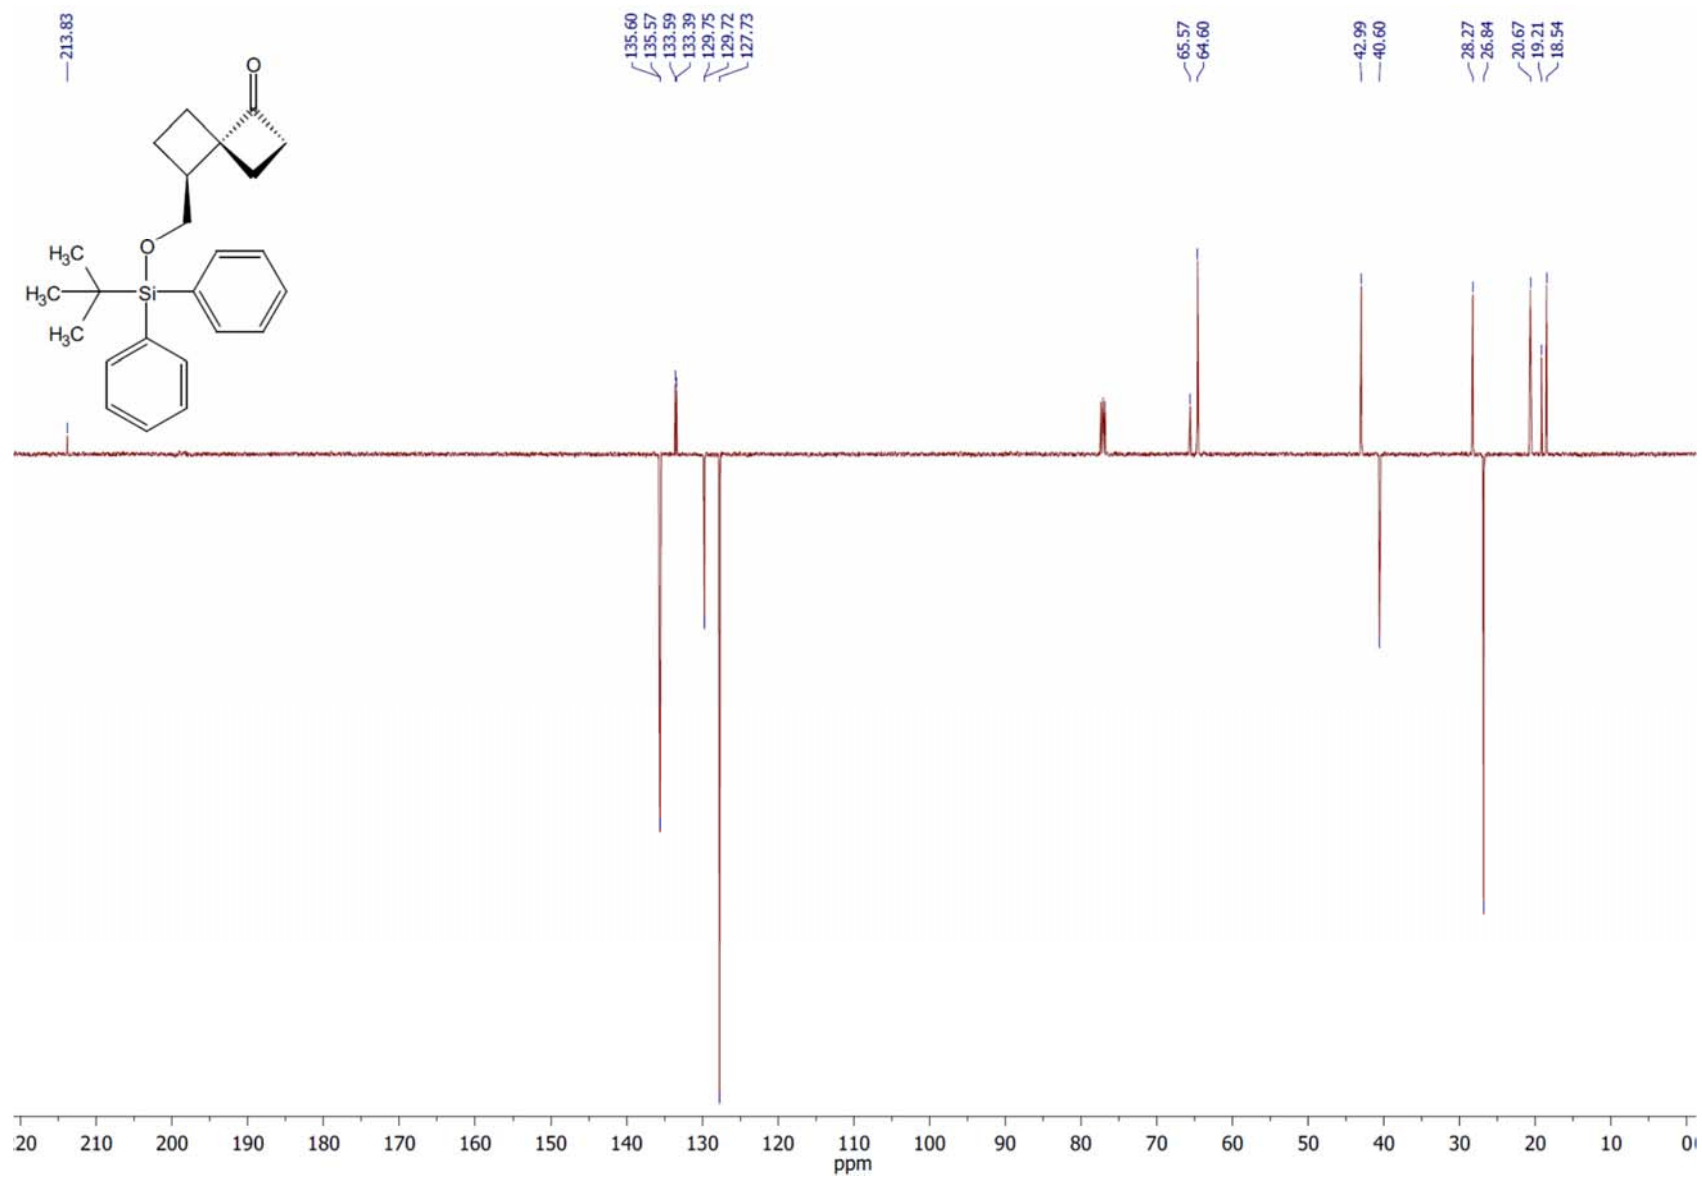



<sup>1</sup>H NMR spectrum of compound **49a**

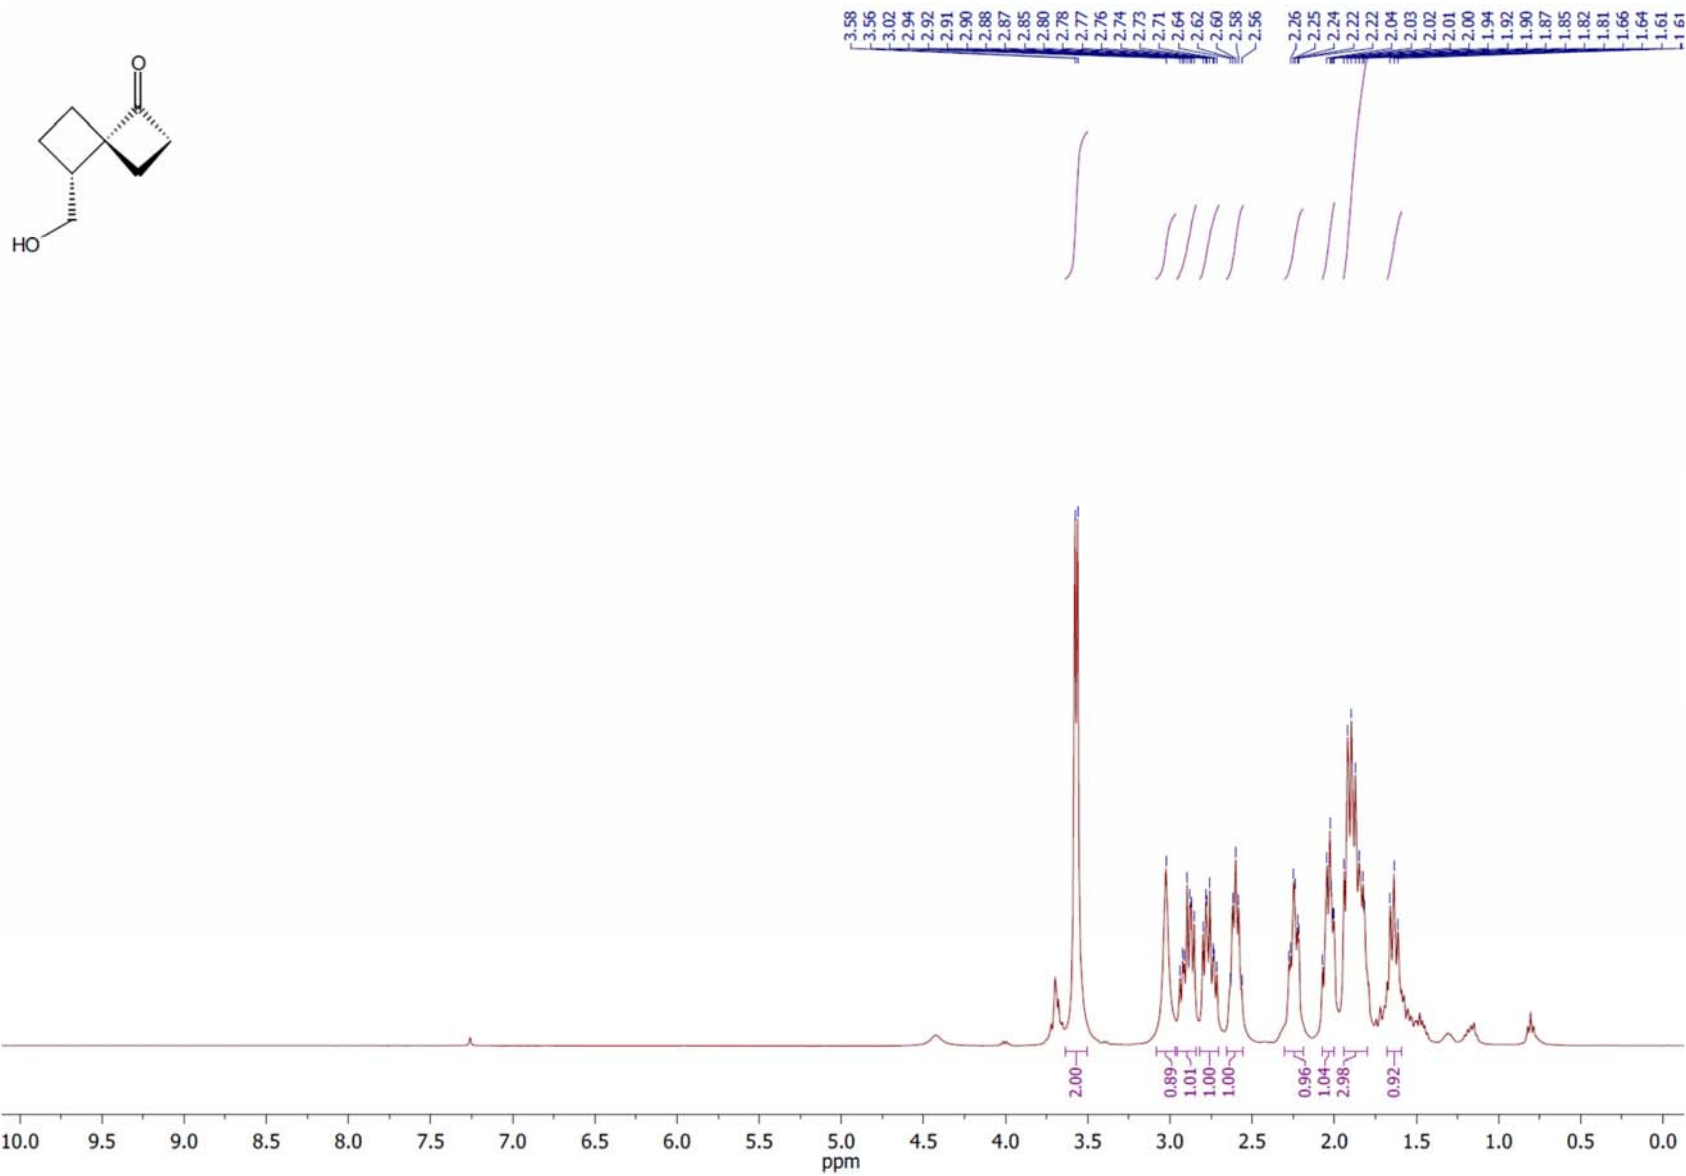

APT  $^{13}\text{C}\{^1\text{H}\}$  NMR spectrum of compound **49a**

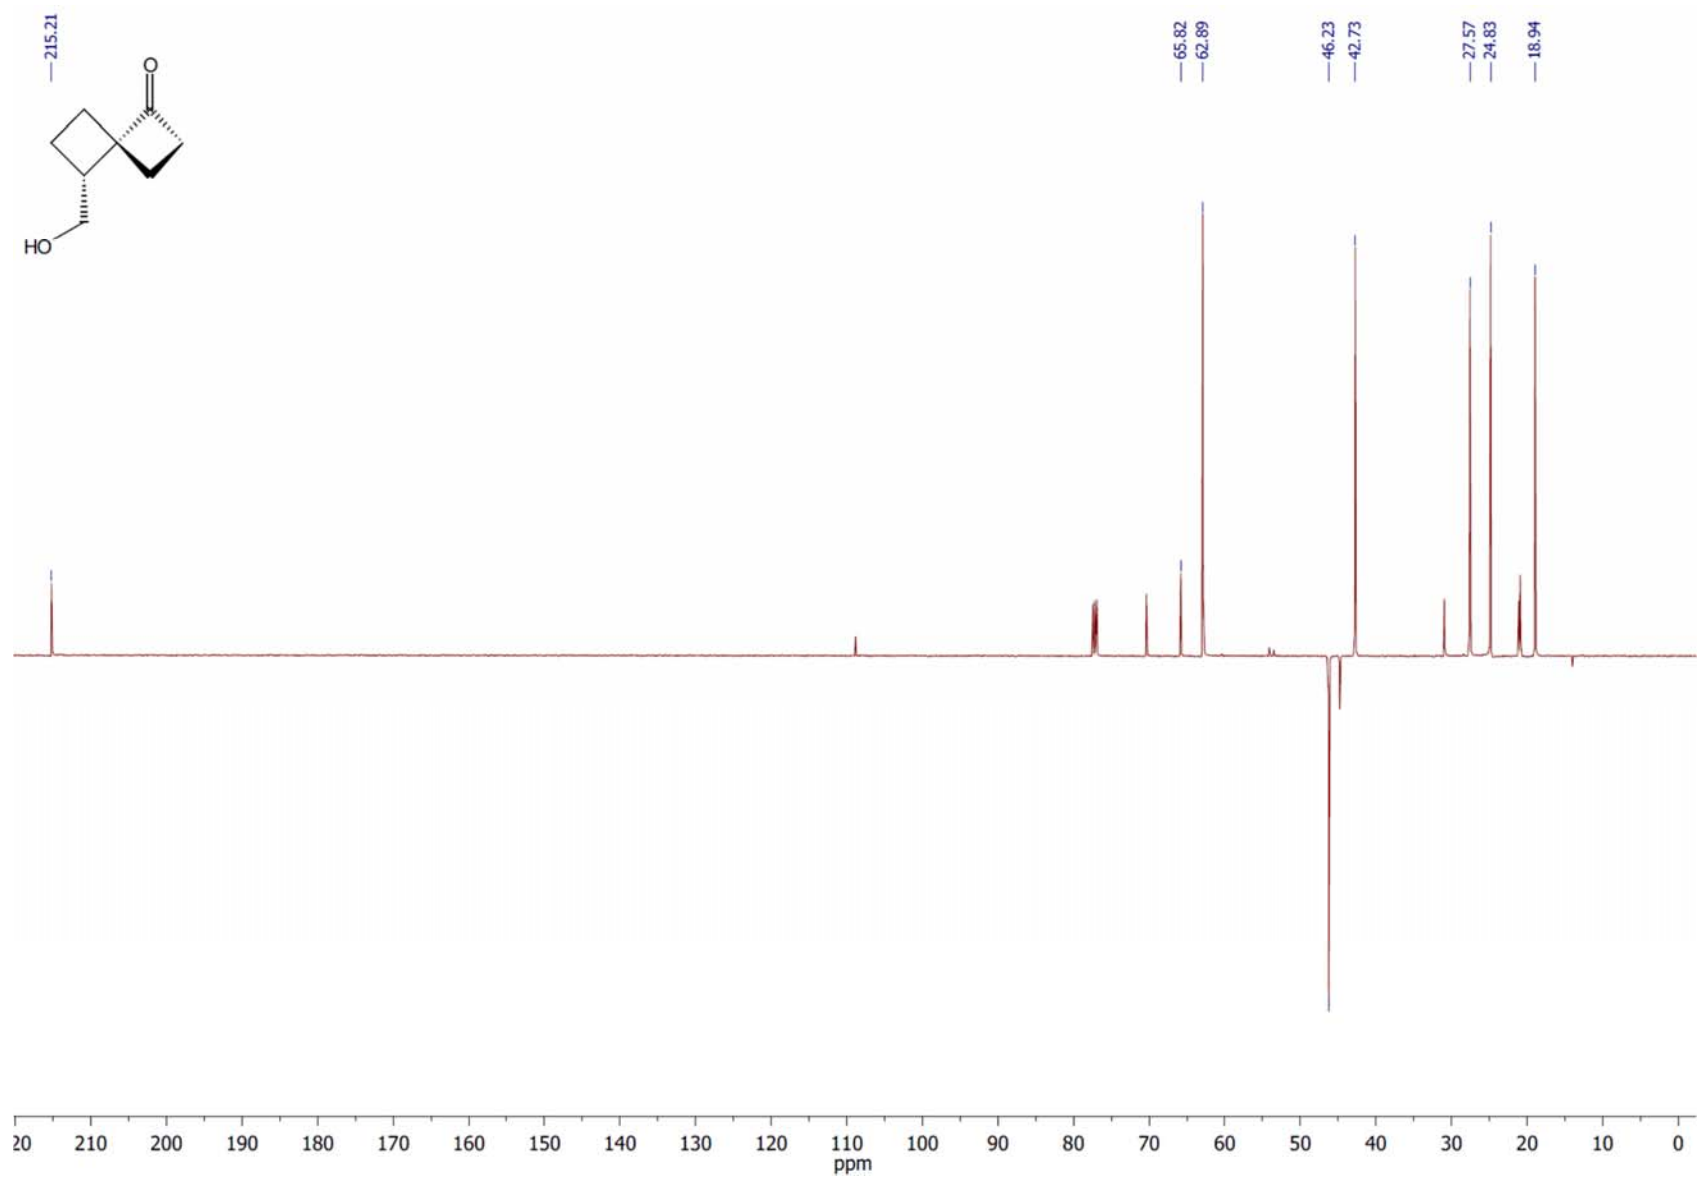

<sup>1</sup>H NMR spectrum of compound **49b**

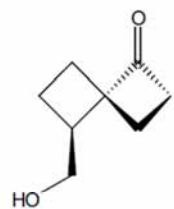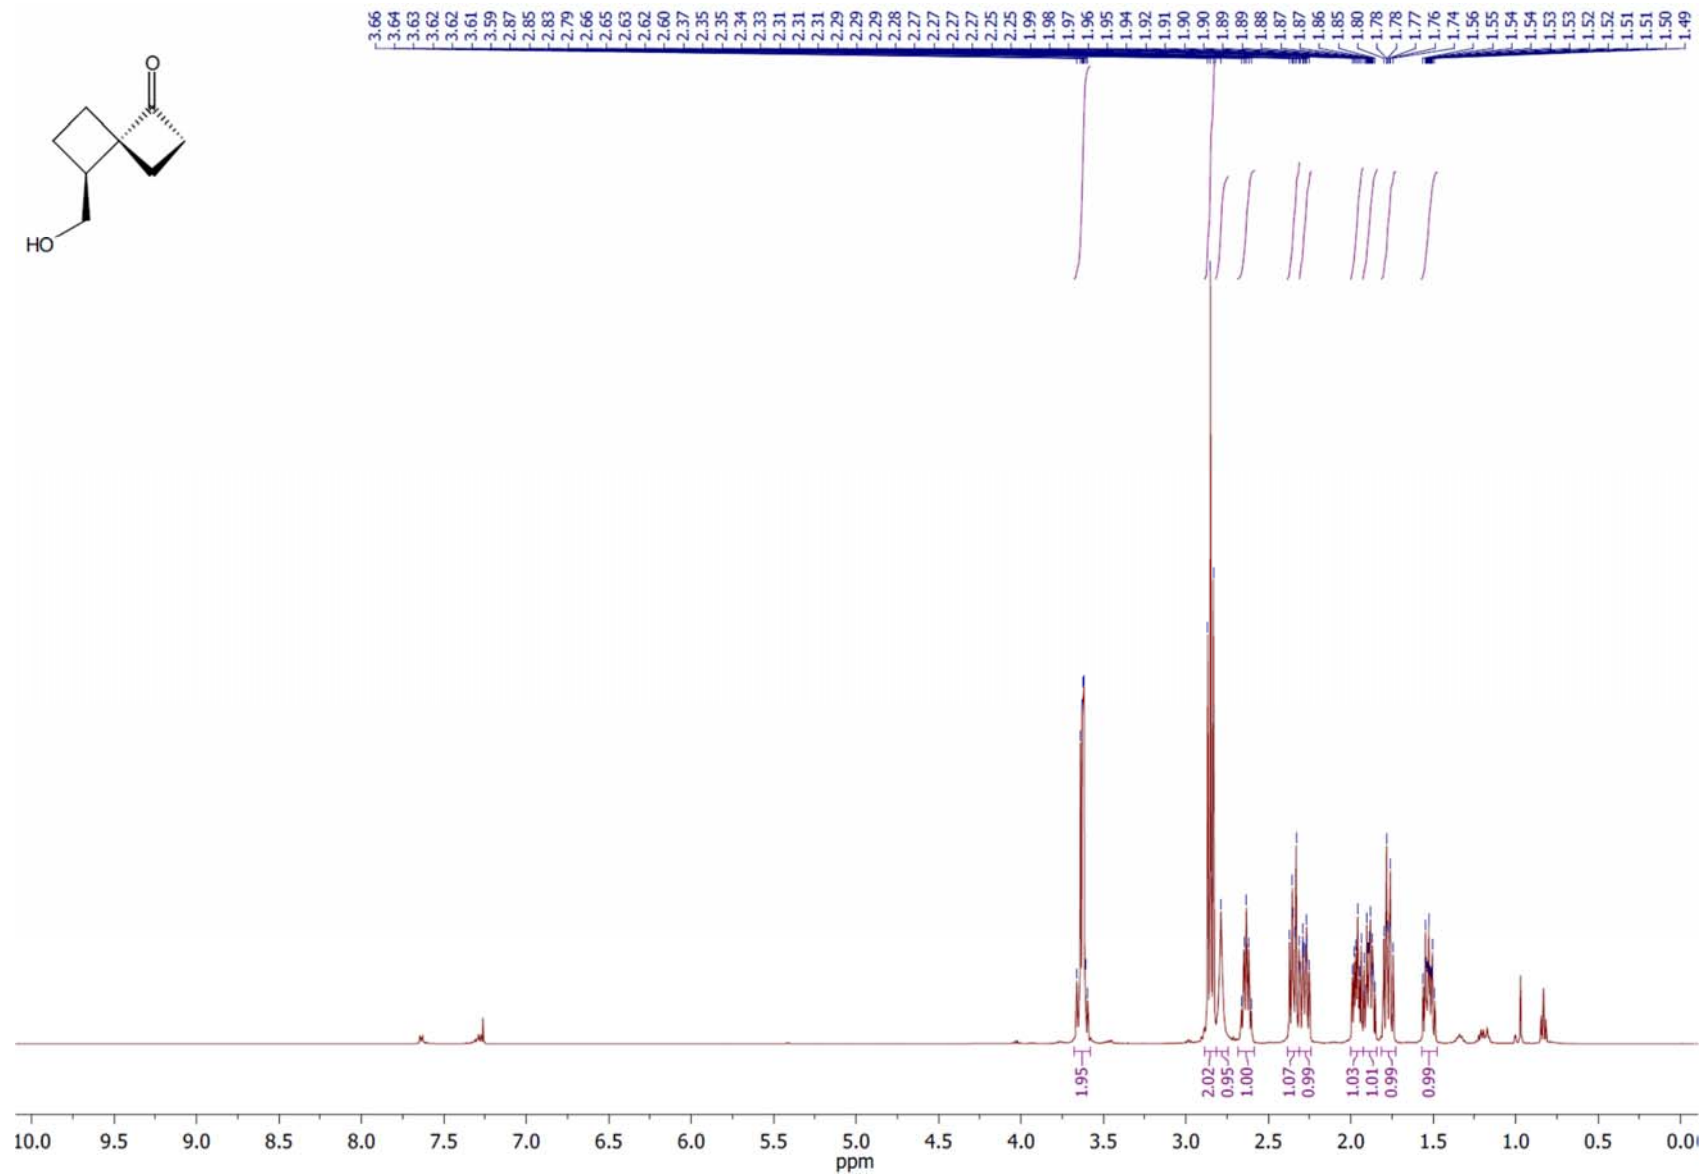

APT  $^{13}\text{C}\{^1\text{H}\}$  NMR spectrum of compound **49b**

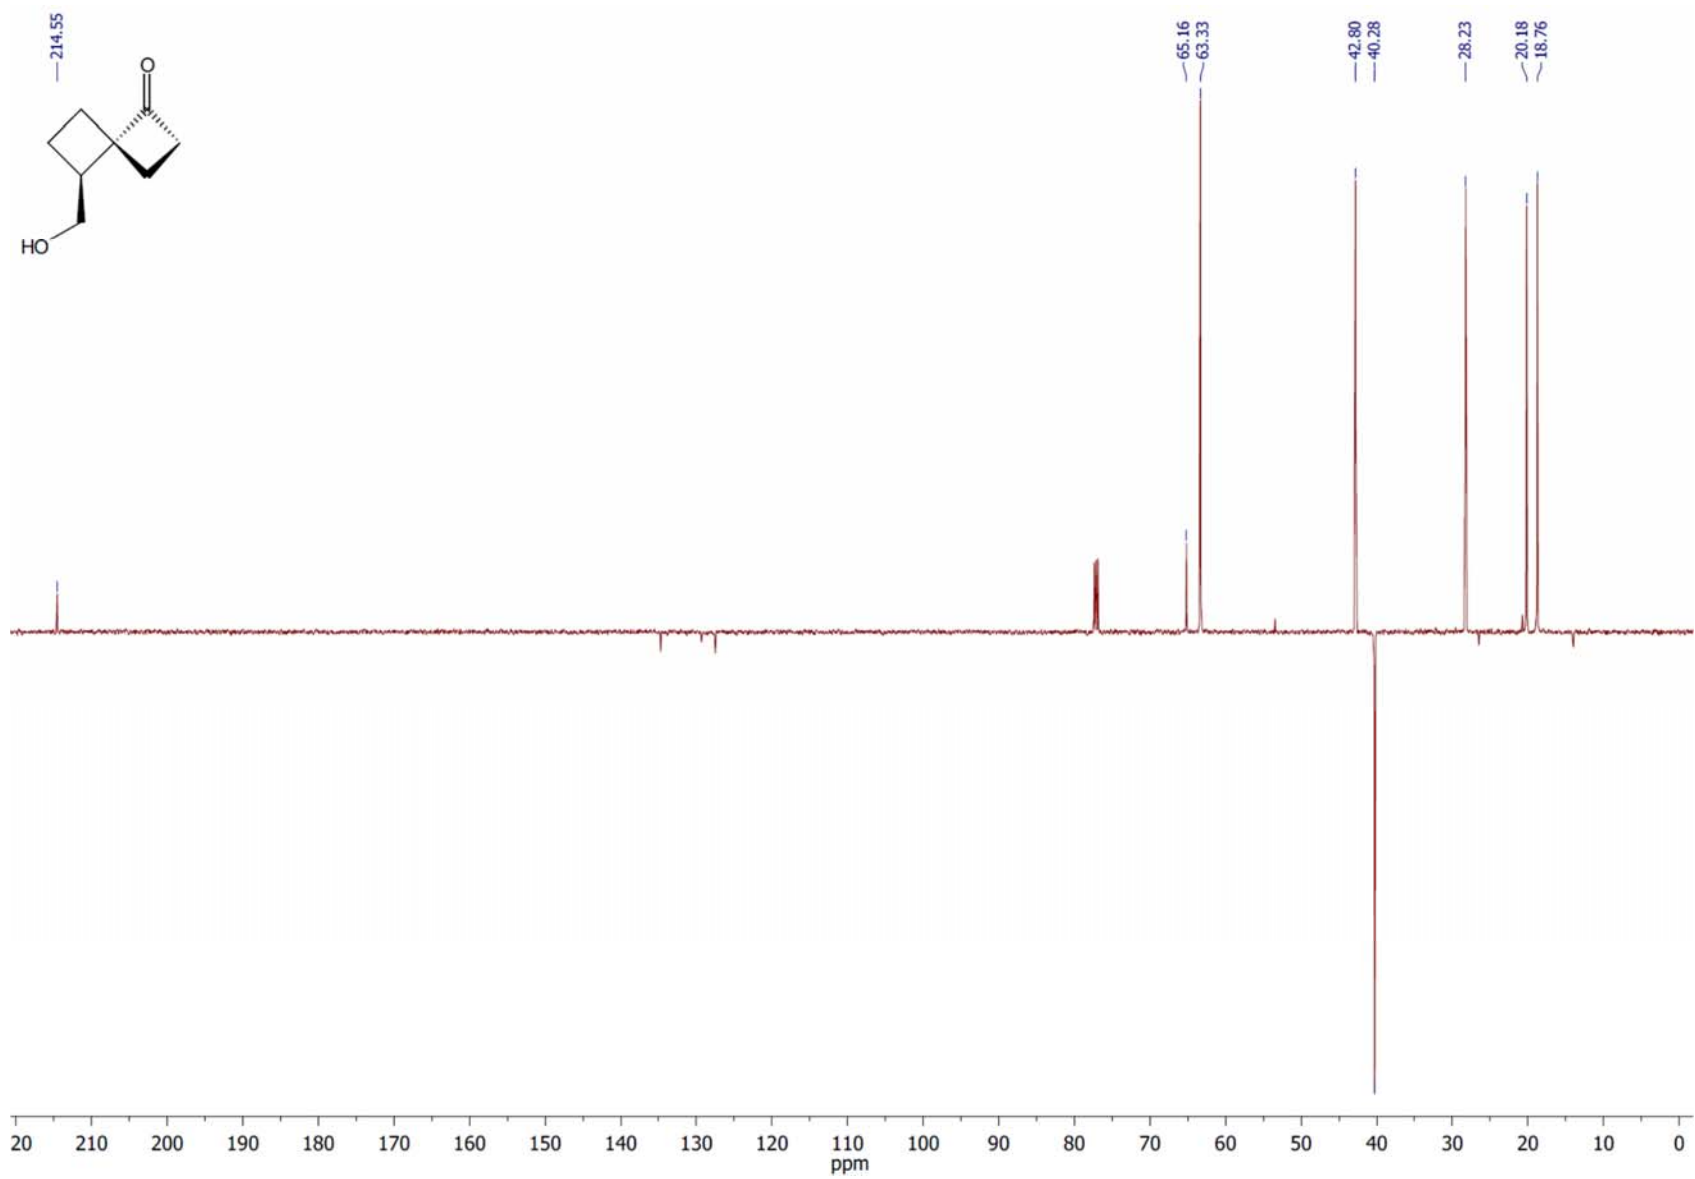

<sup>1</sup>H NMR spectrum of compound **50a**

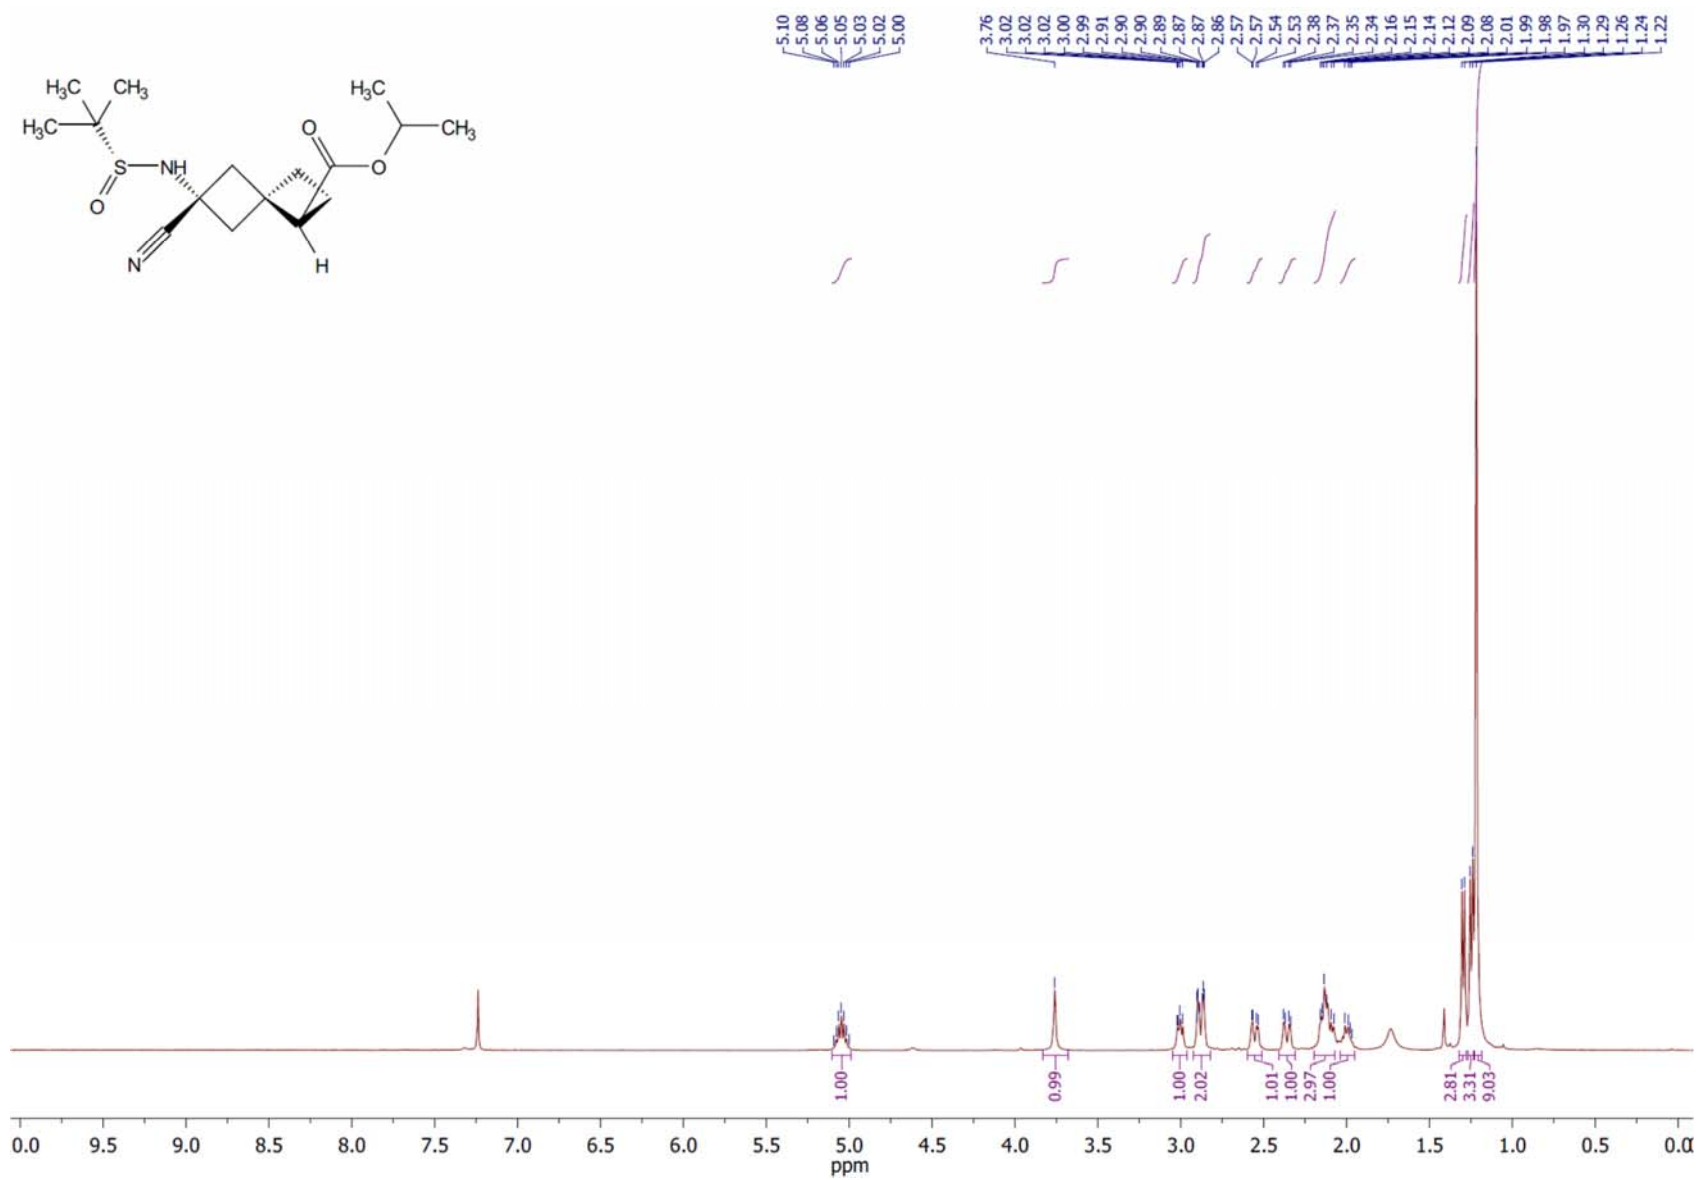

APT  $^{13}\text{C}\{^1\text{H}\}$  NMR spectrum of compound **50a**

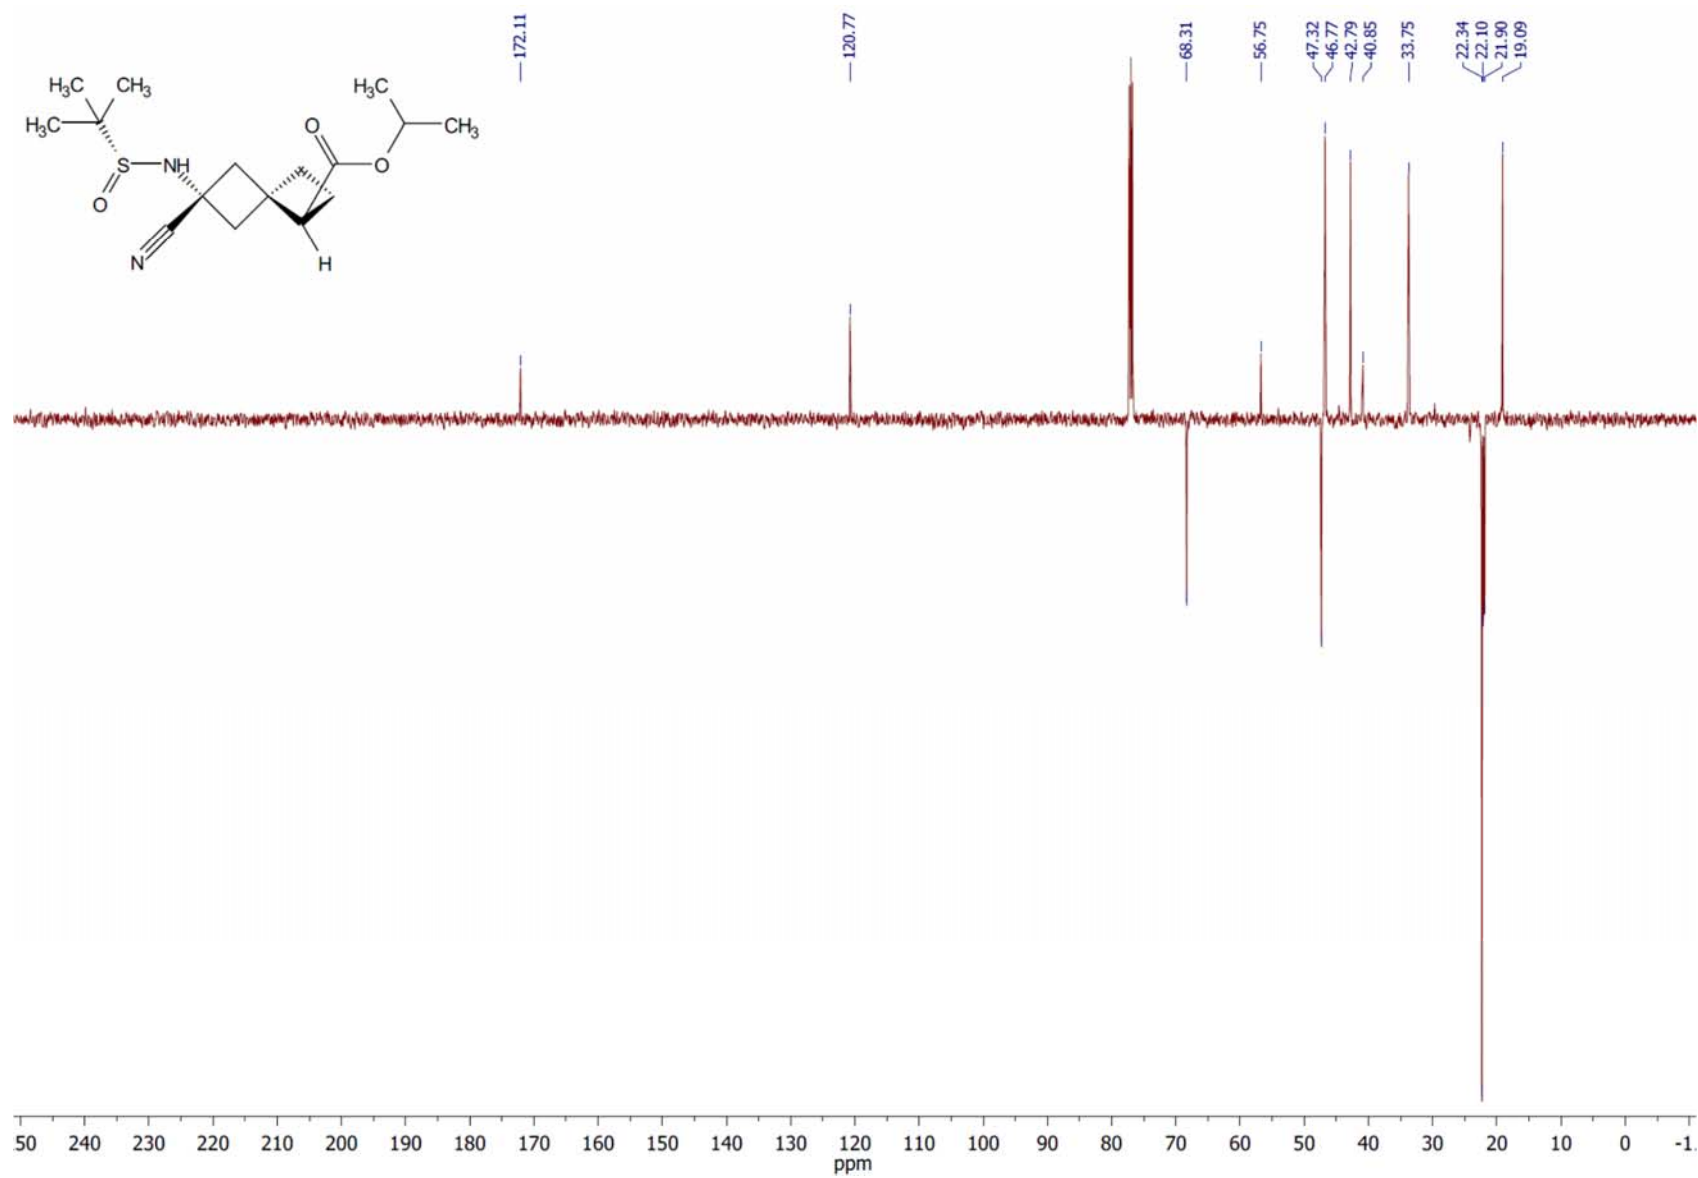

<sup>1</sup>H NMR spectrum of compound **50b**

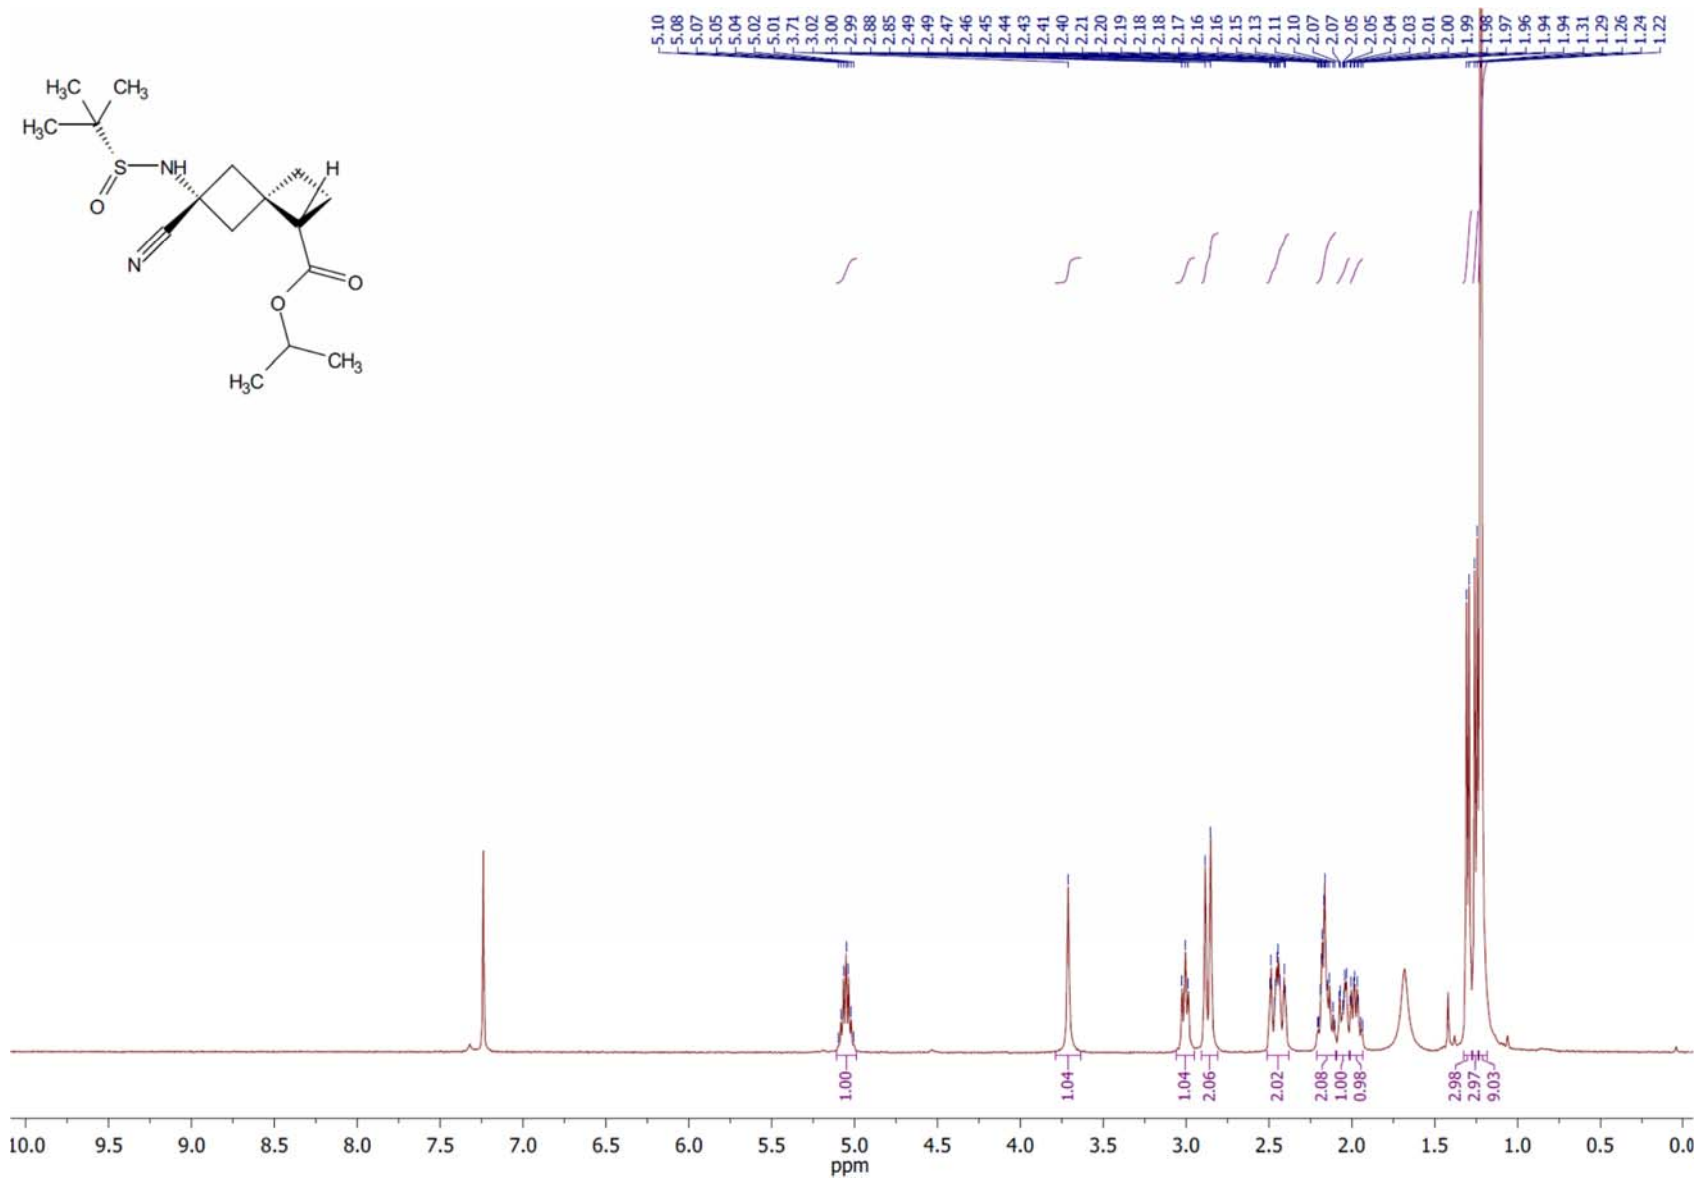

APT  $^{13}\text{C}\{^1\text{H}\}$  NMR spectrum of compound **50b**

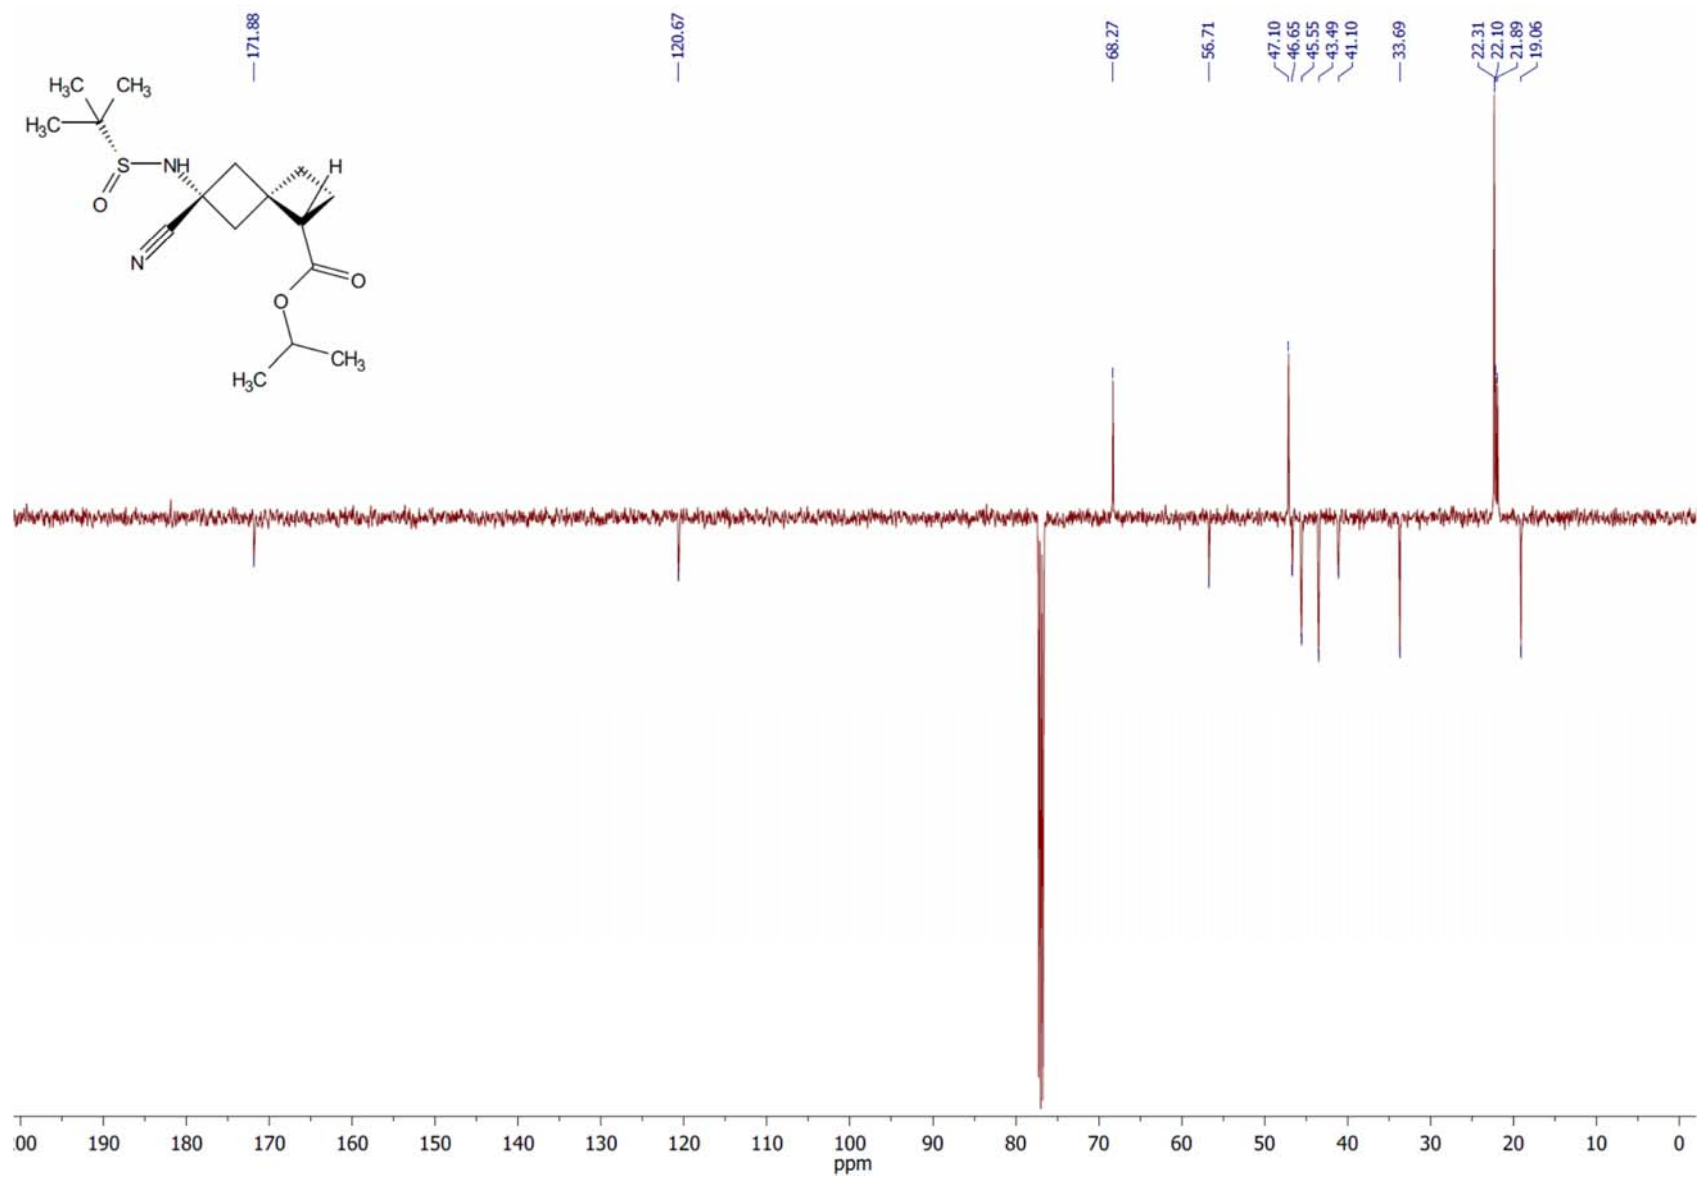



<sup>1</sup>H NMR spectrum of compound **51a**

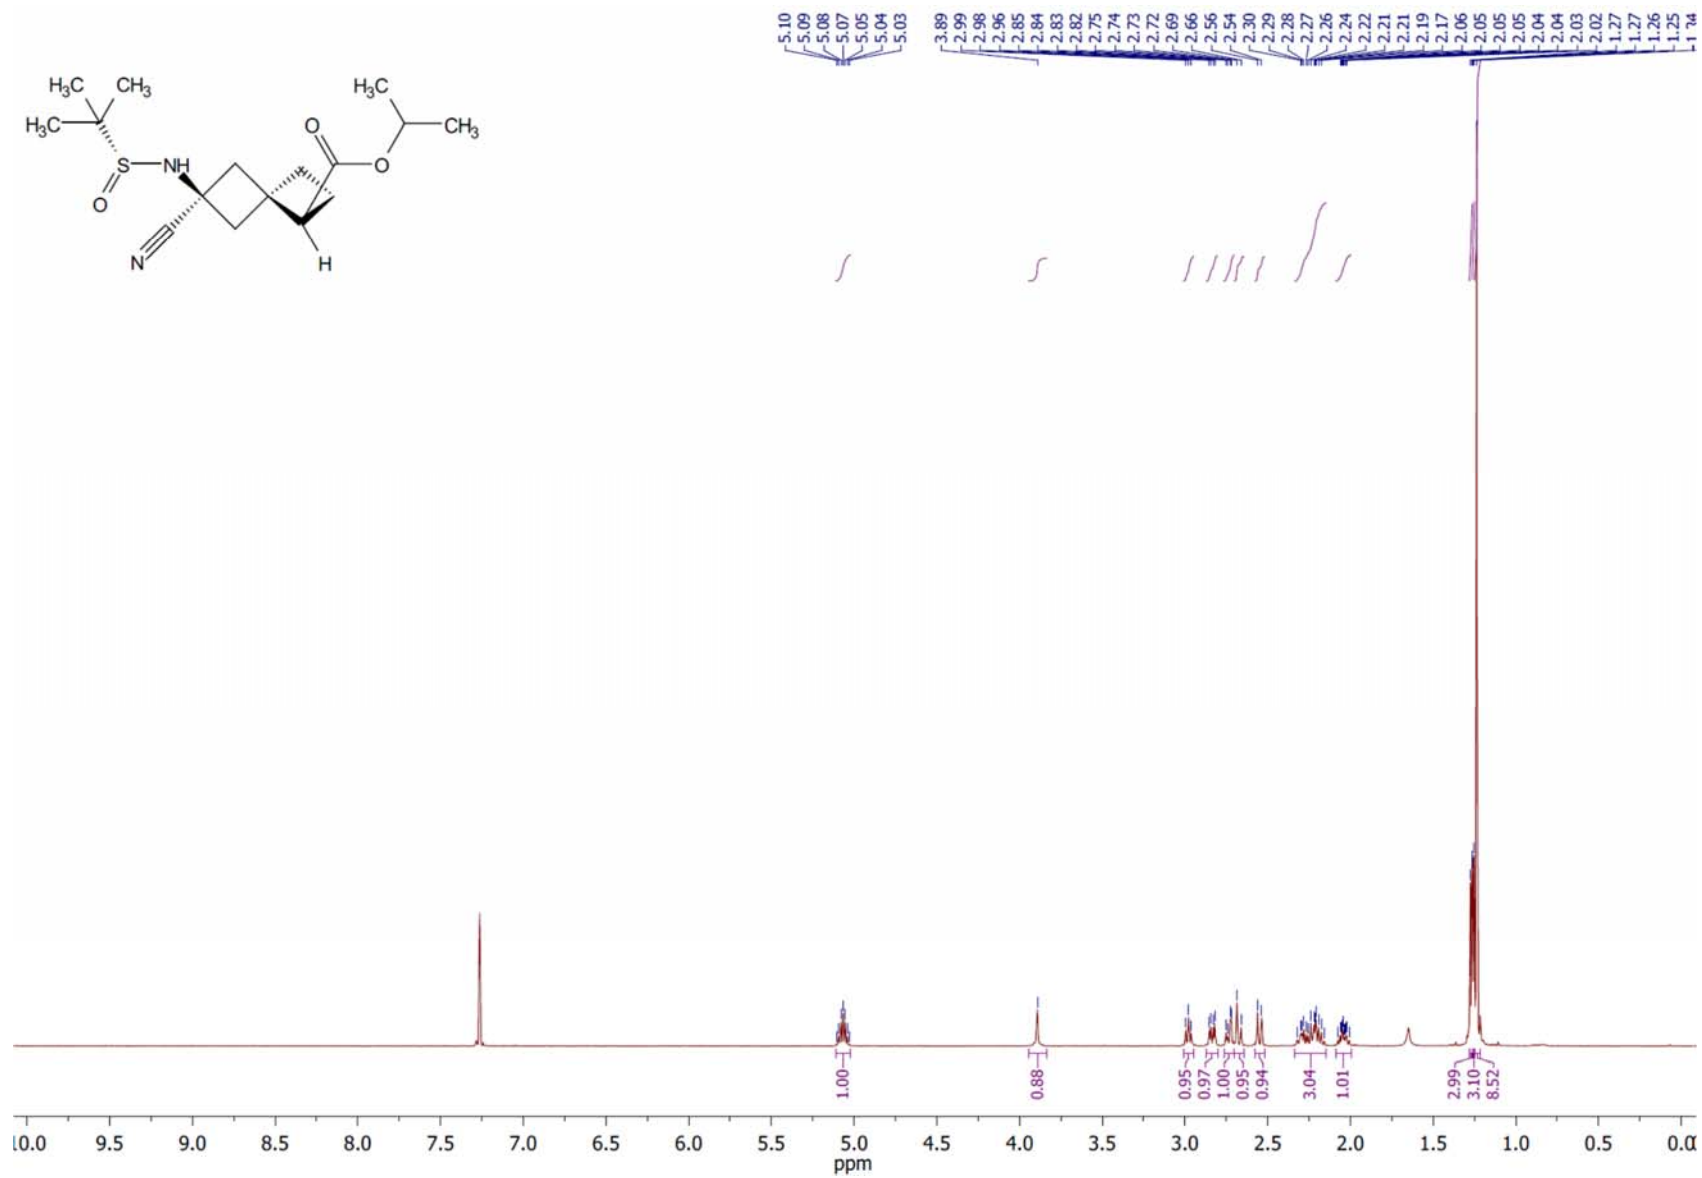

APT  $^{13}\text{C}\{^1\text{H}\}$  NMR spectrum of compound **51a**

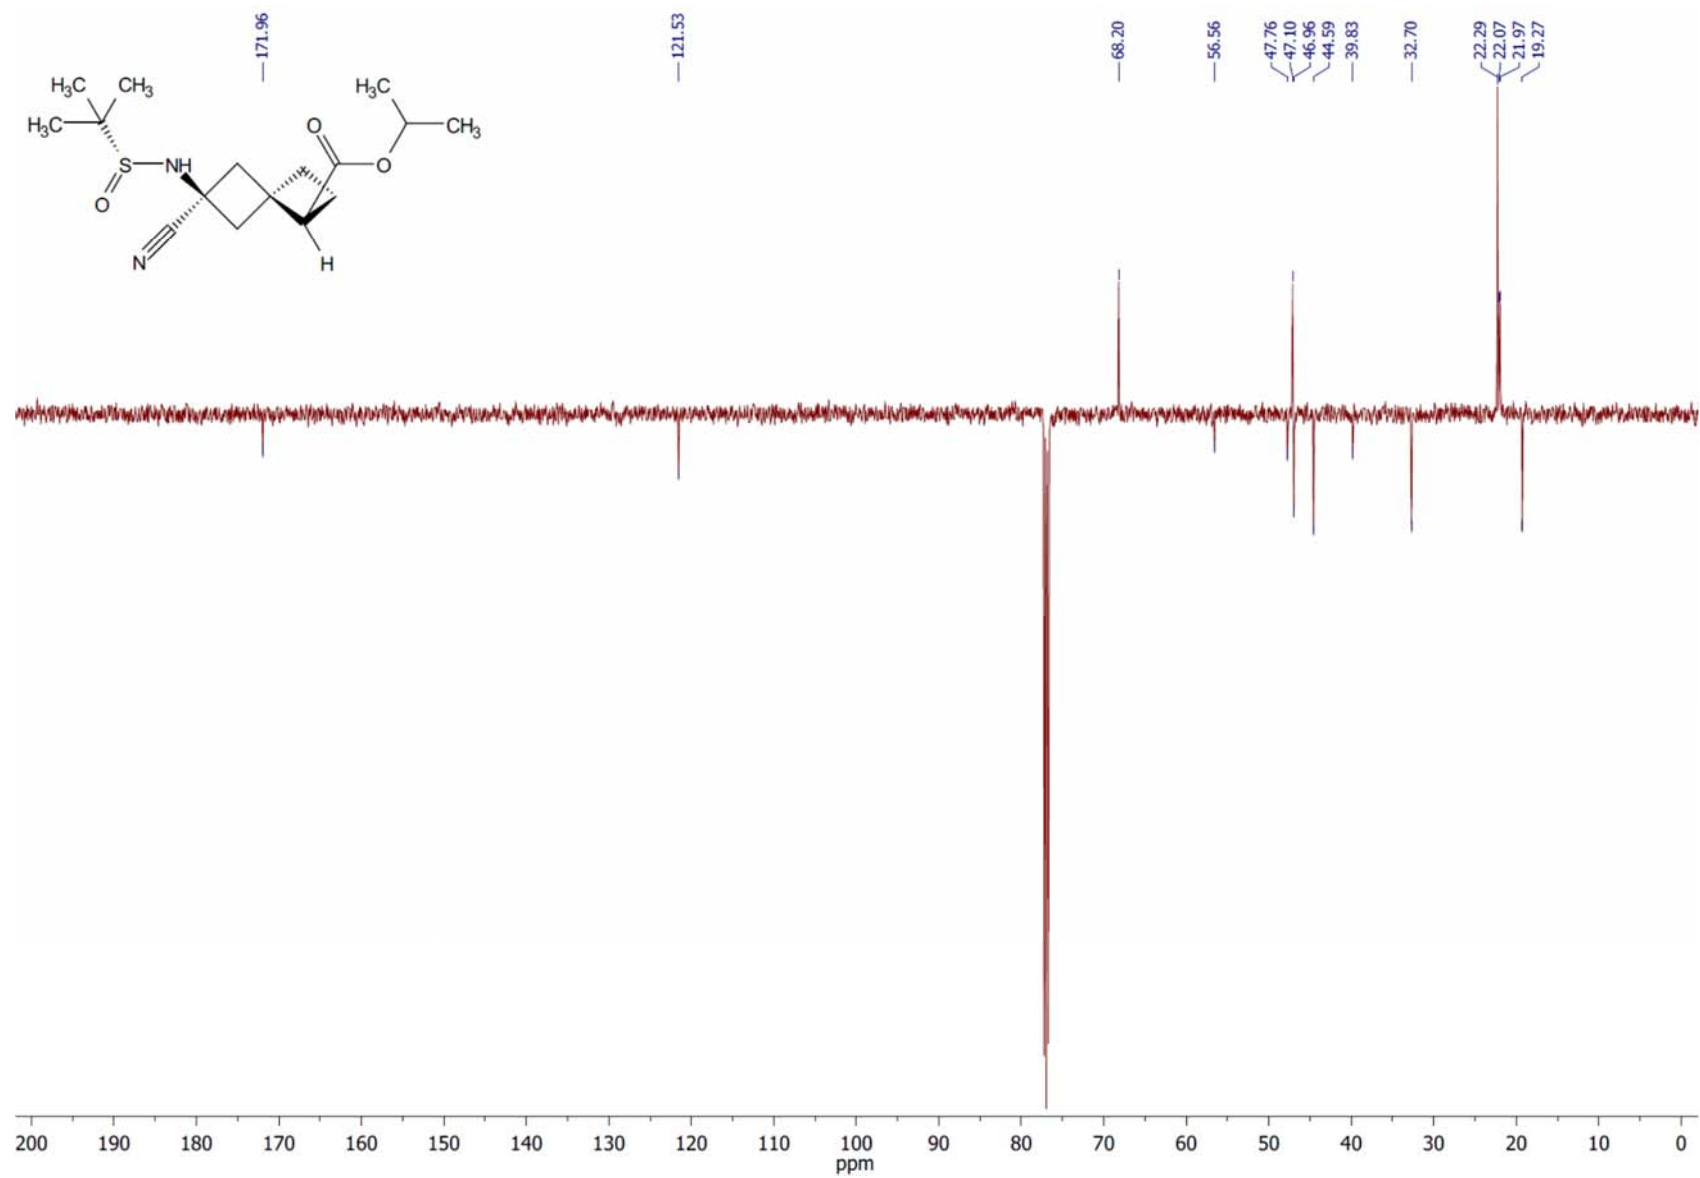

<sup>1</sup>H NMR spectrum of compound **51b**

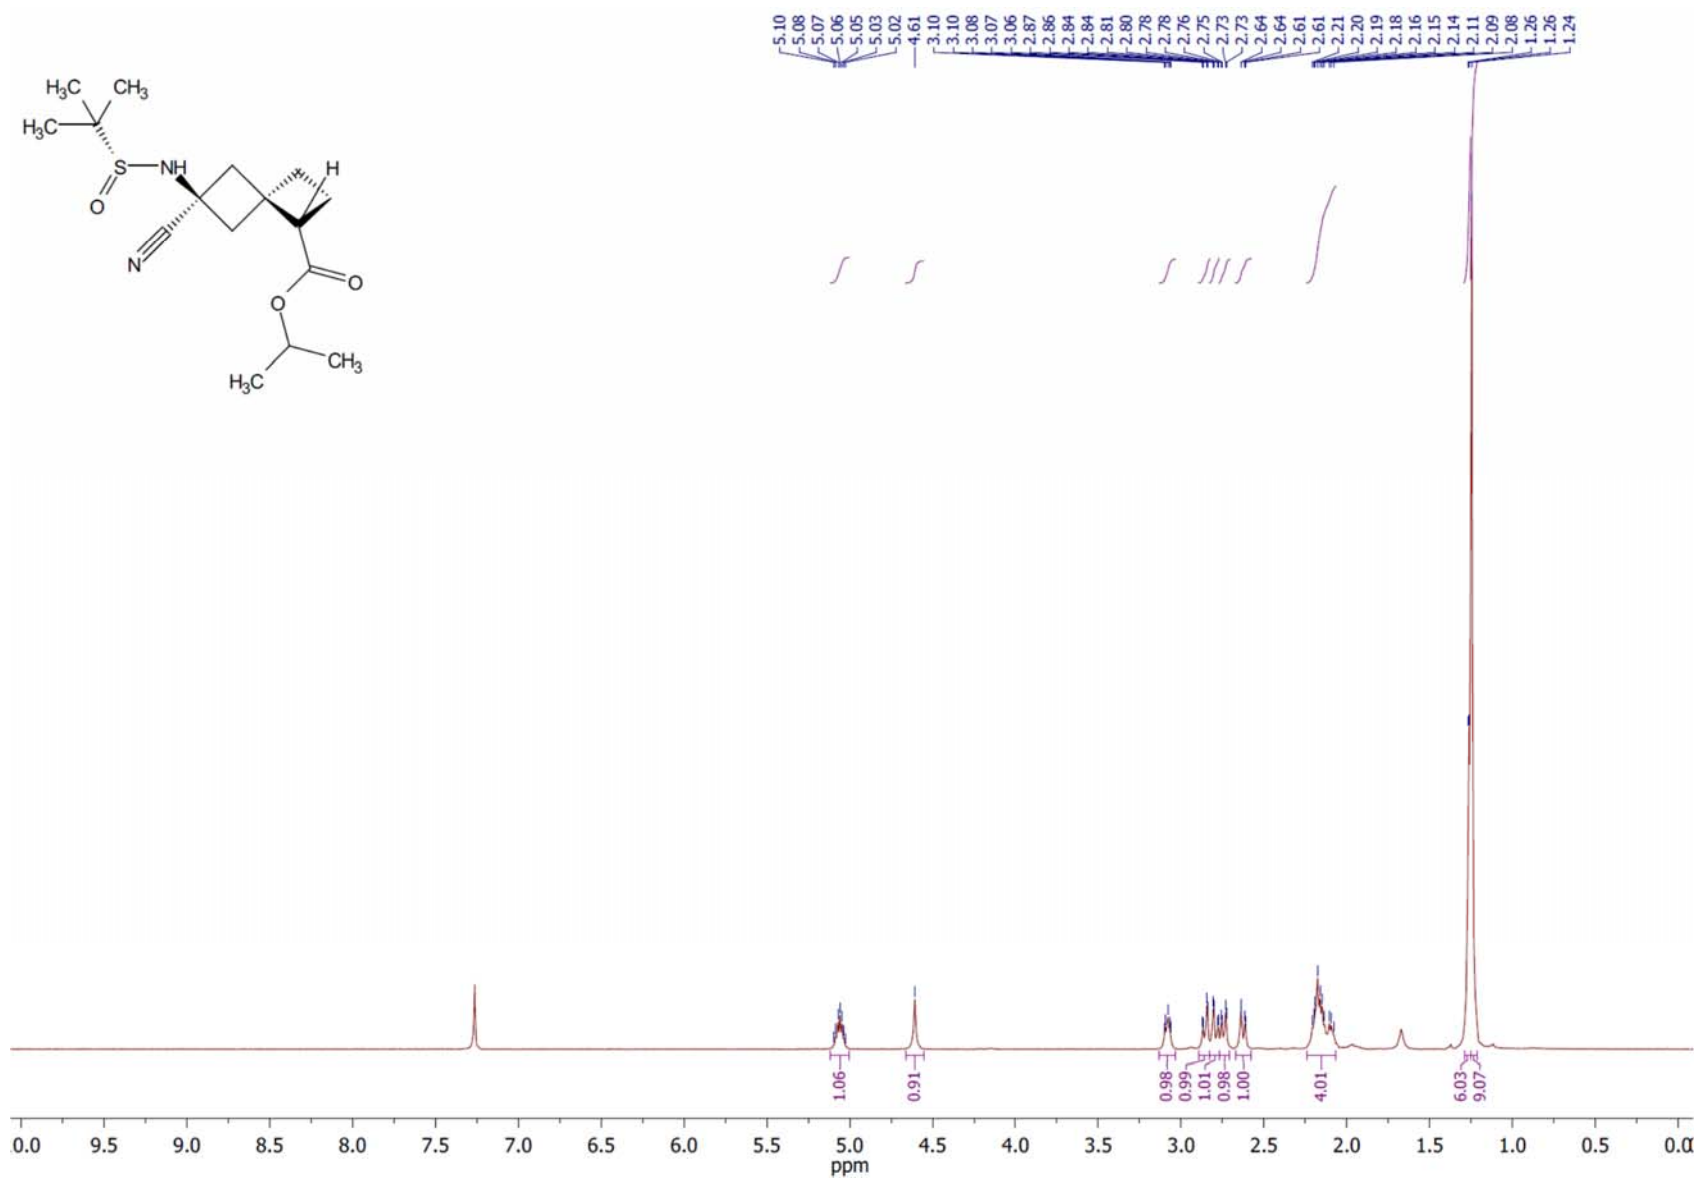

APT  $^{13}\text{C}\{^1\text{H}\}$  NMR spectrum of compound **51b**

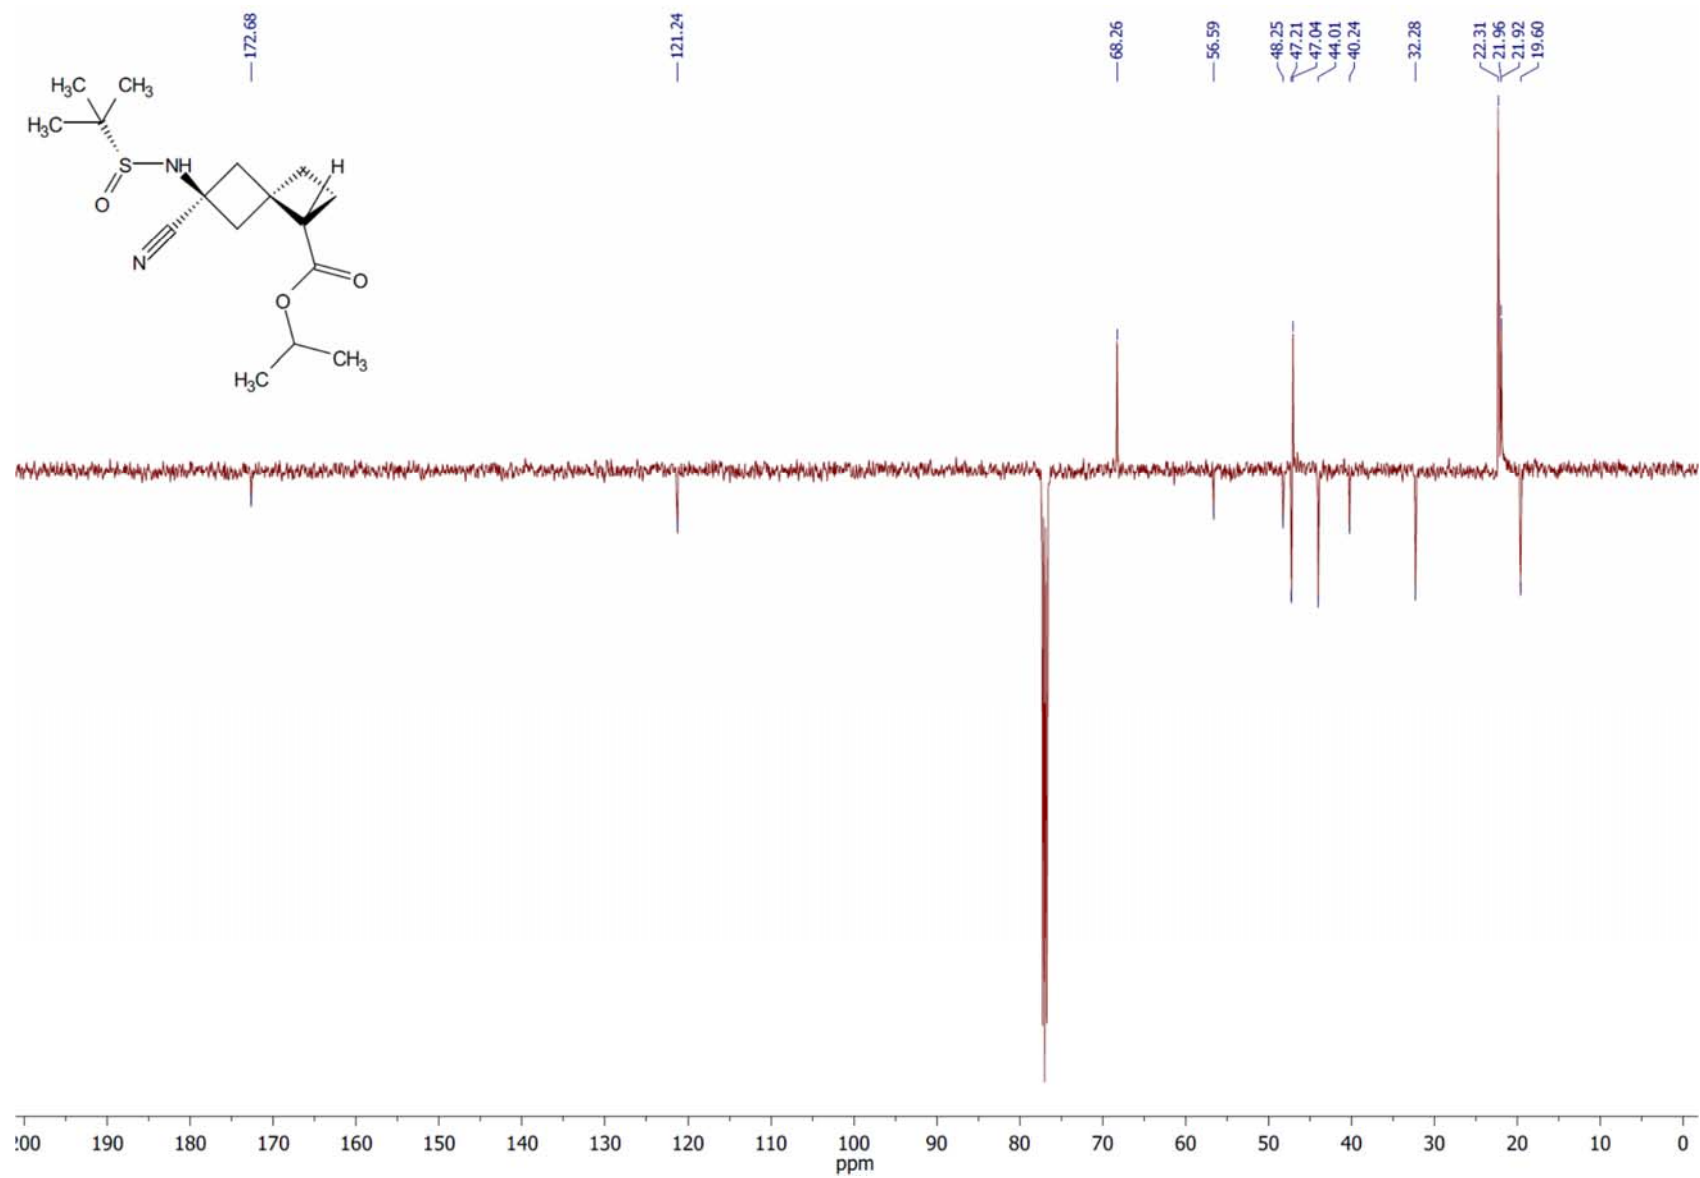

<sup>1</sup>H NMR spectrum of compound **52a**

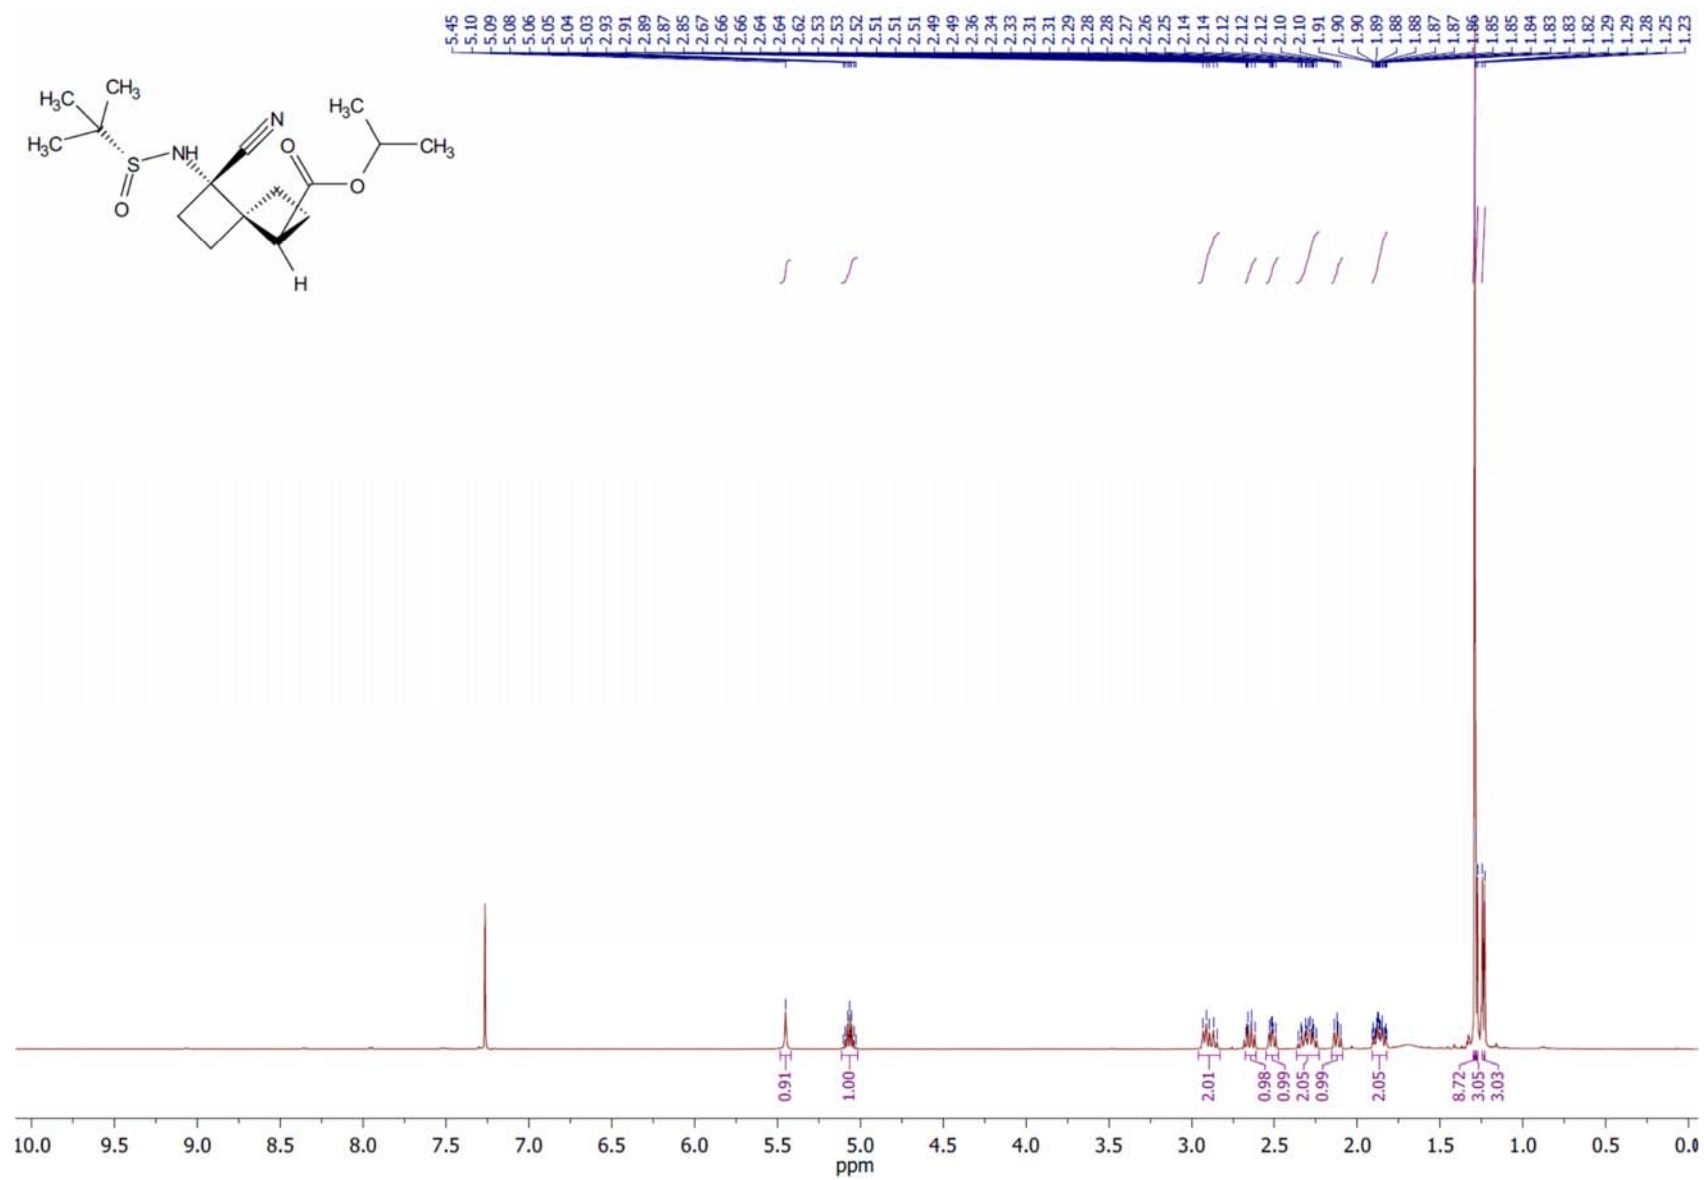

APT  $^{13}\text{C}\{^1\text{H}\}$  NMR spectrum of compound **52a**

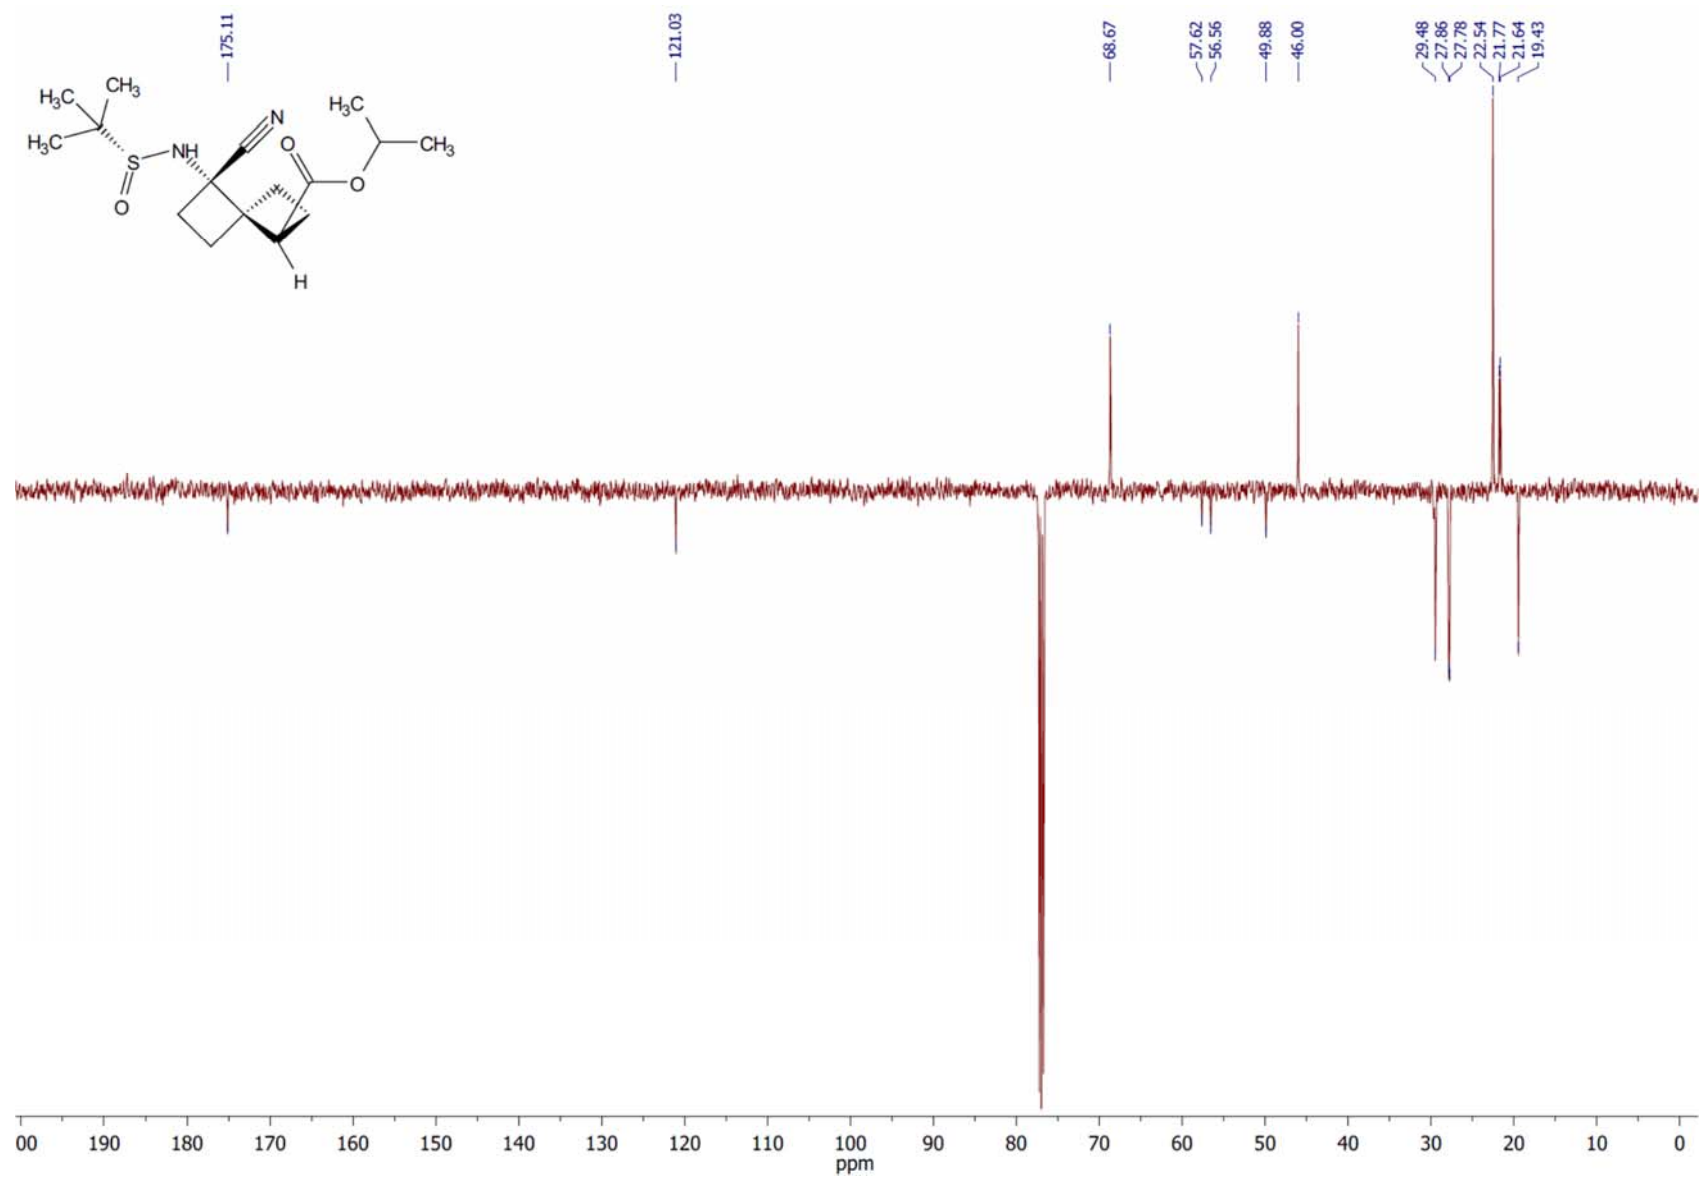

<sup>1</sup>H NMR spectrum of compound **52b**

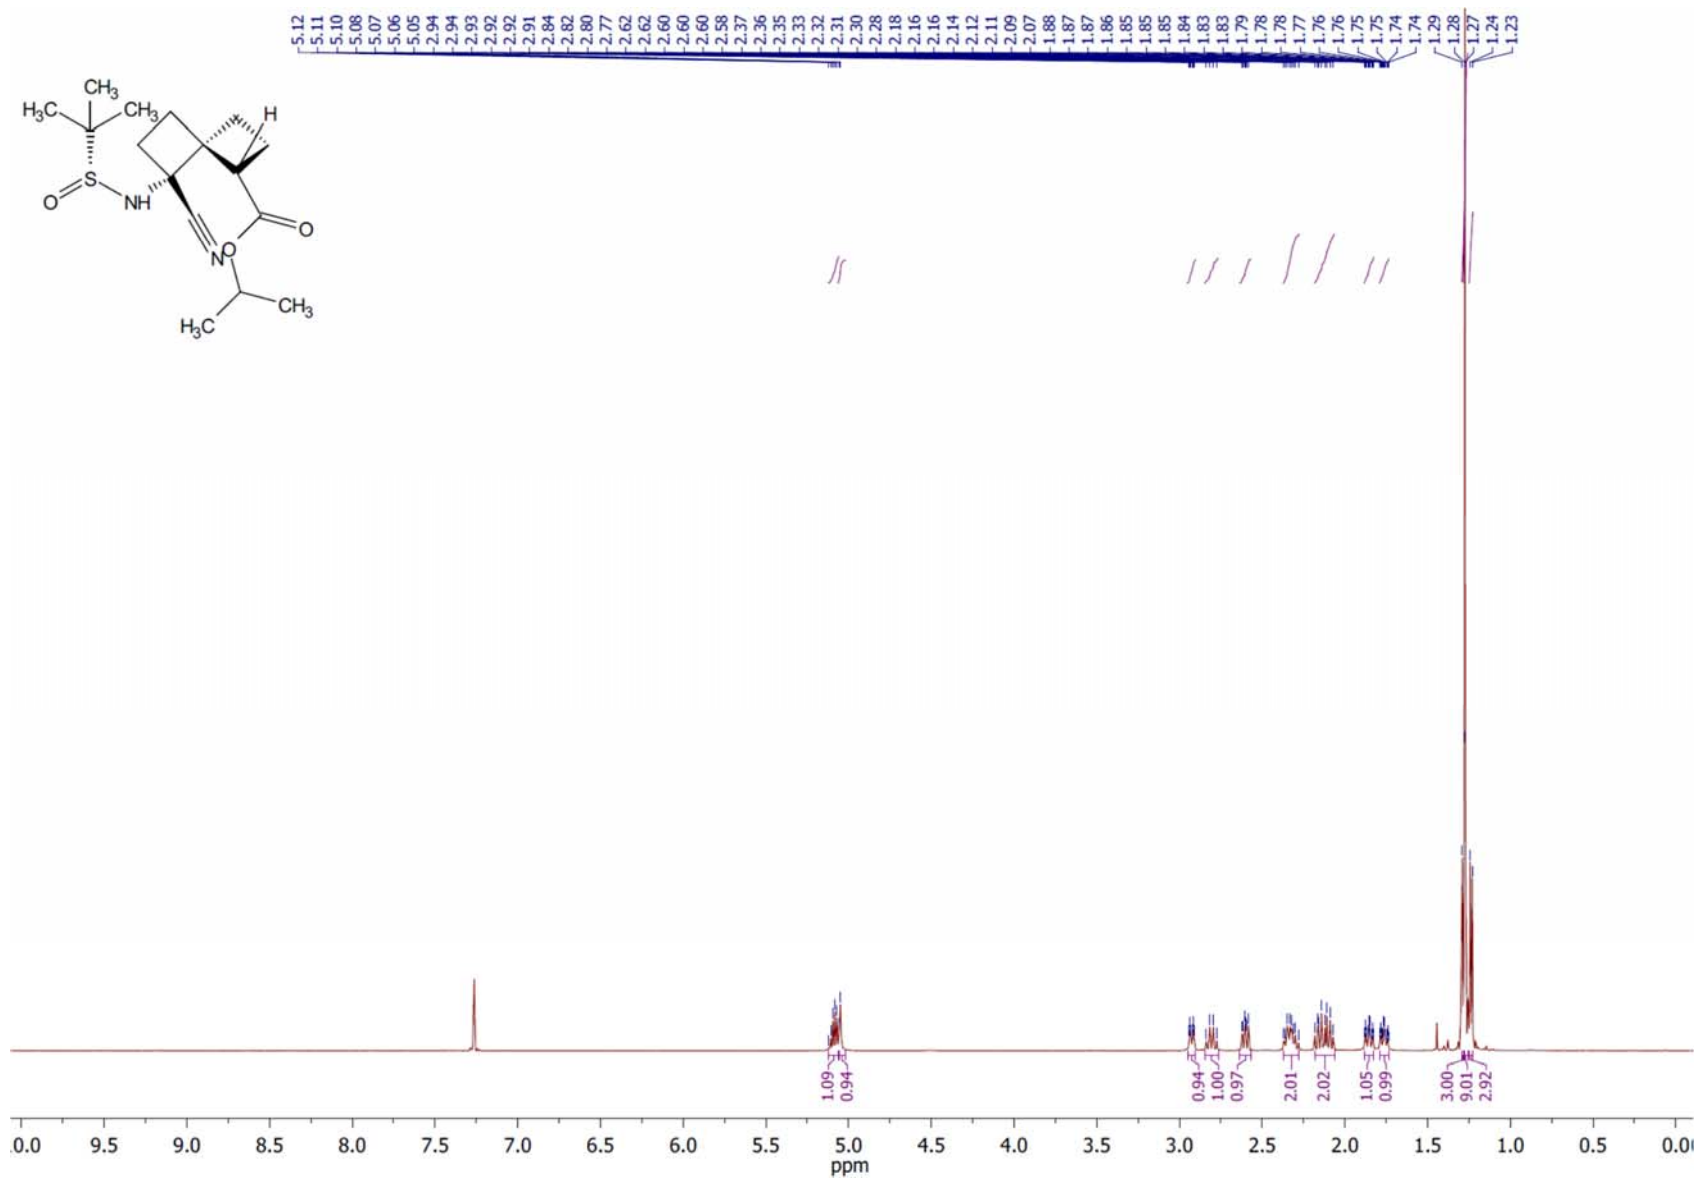

APT  $^{13}\text{C}\{^1\text{H}\}$  NMR spectrum of compound **52b**

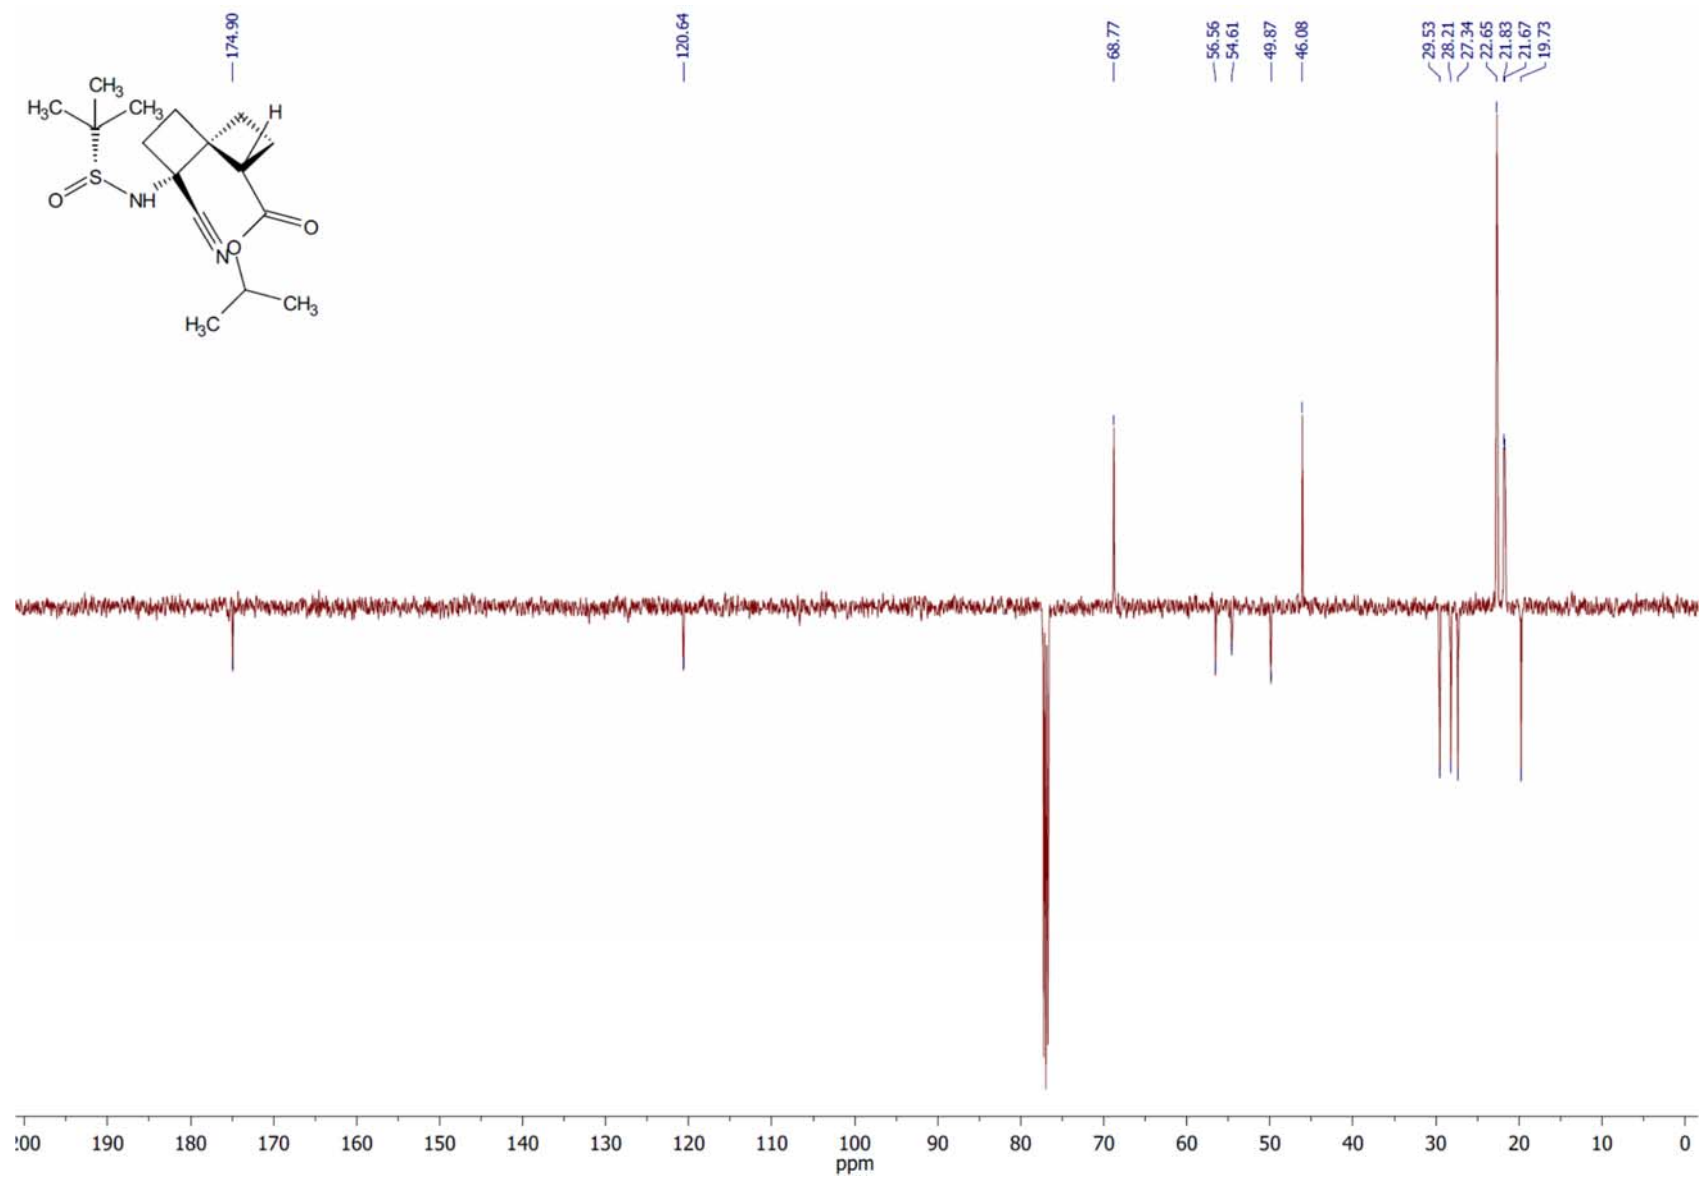



<sup>1</sup>H NMR spectrum of compound **53a**

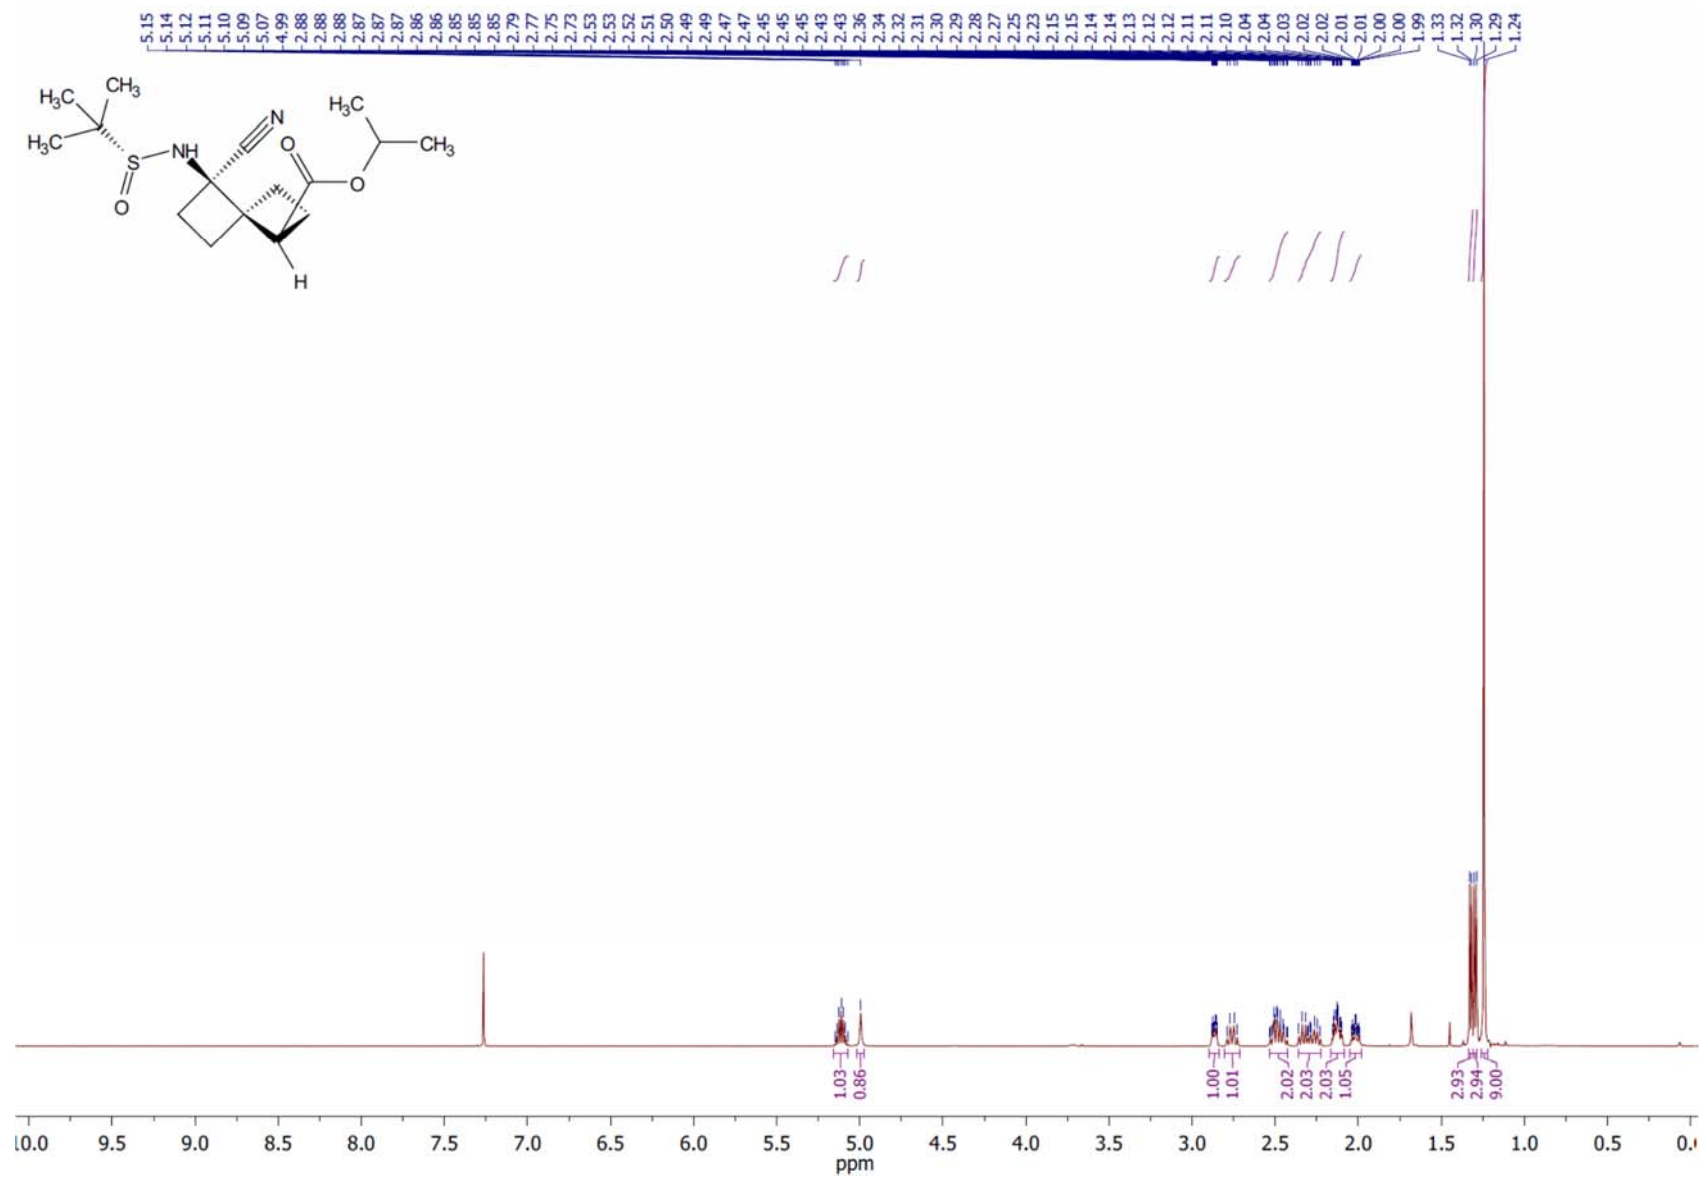

APT  $^{13}\text{C}\{^1\text{H}\}$  NMR spectrum of compound **53a**

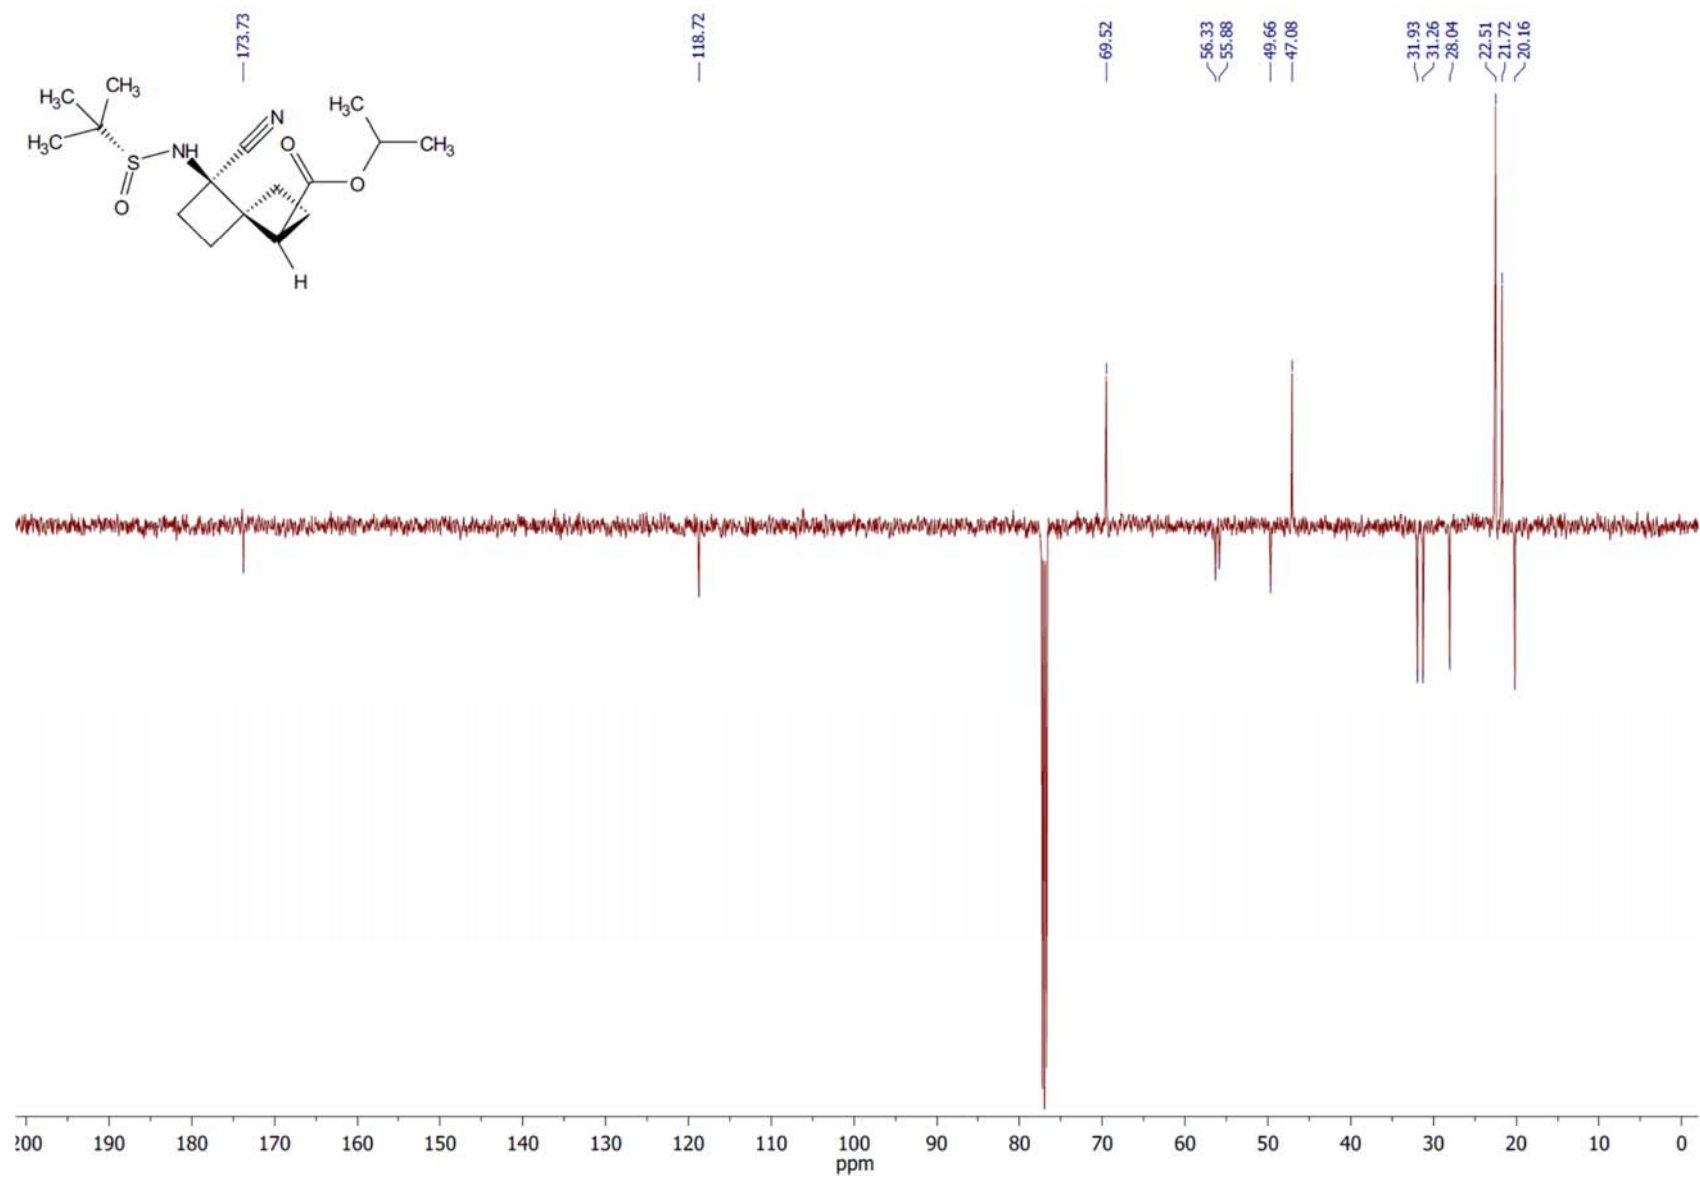

<sup>1</sup>H NMR spectrum of compound **53b**

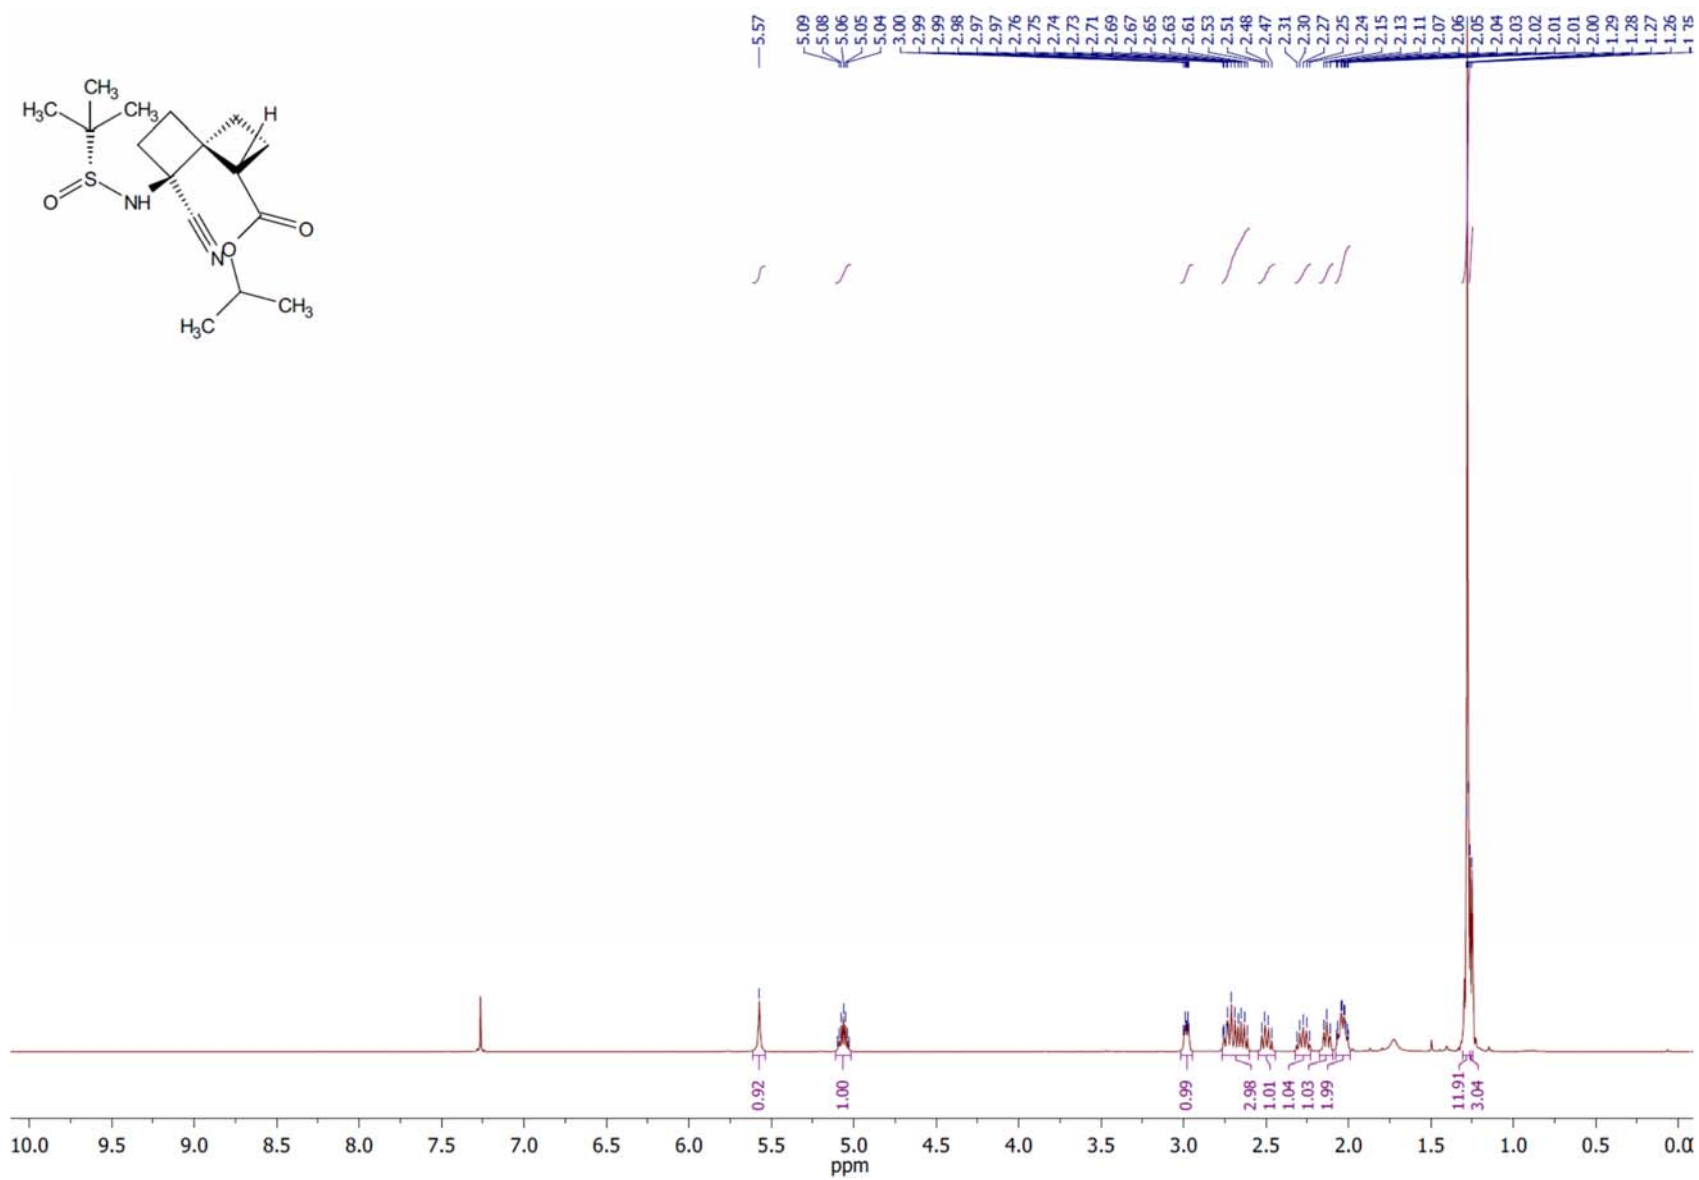

APT  $^{13}\text{C}\{^1\text{H}\}$  NMR spectrum of compound **53b**

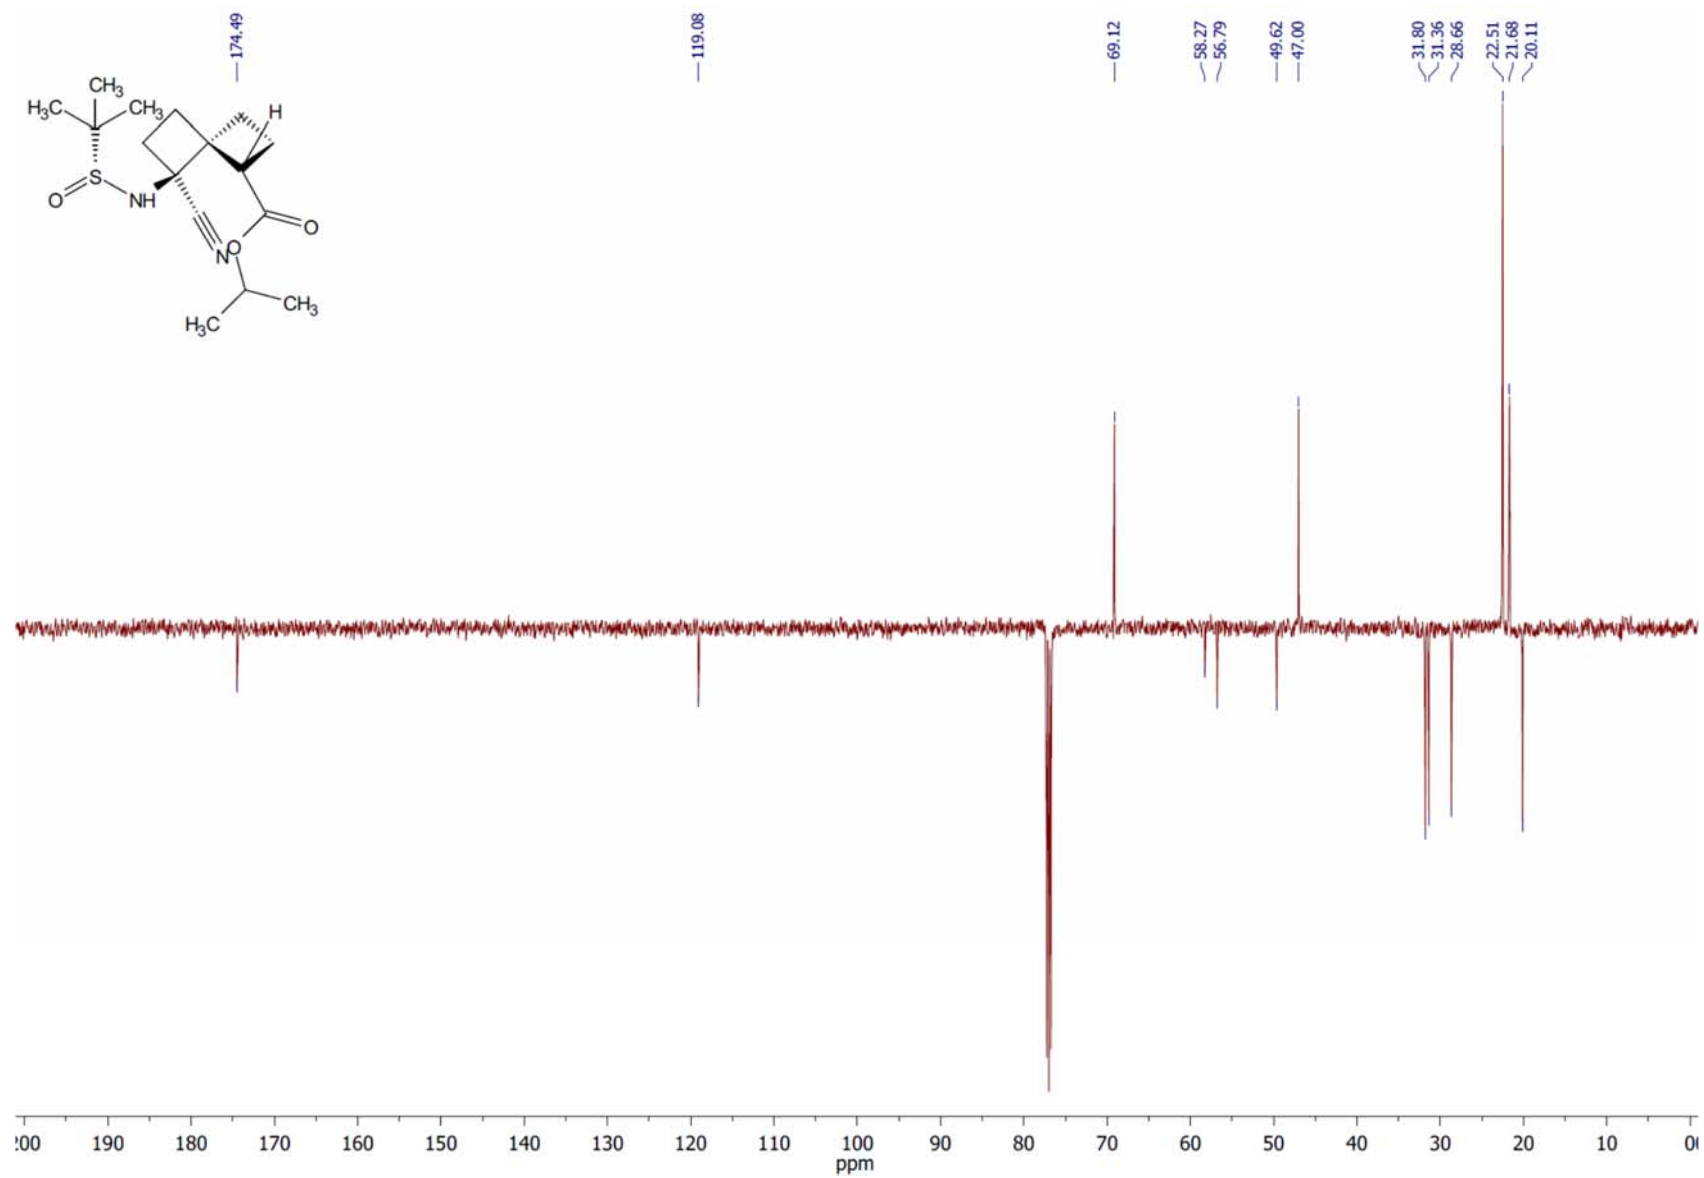

<sup>1</sup>H NMR spectrum of compound **54b**

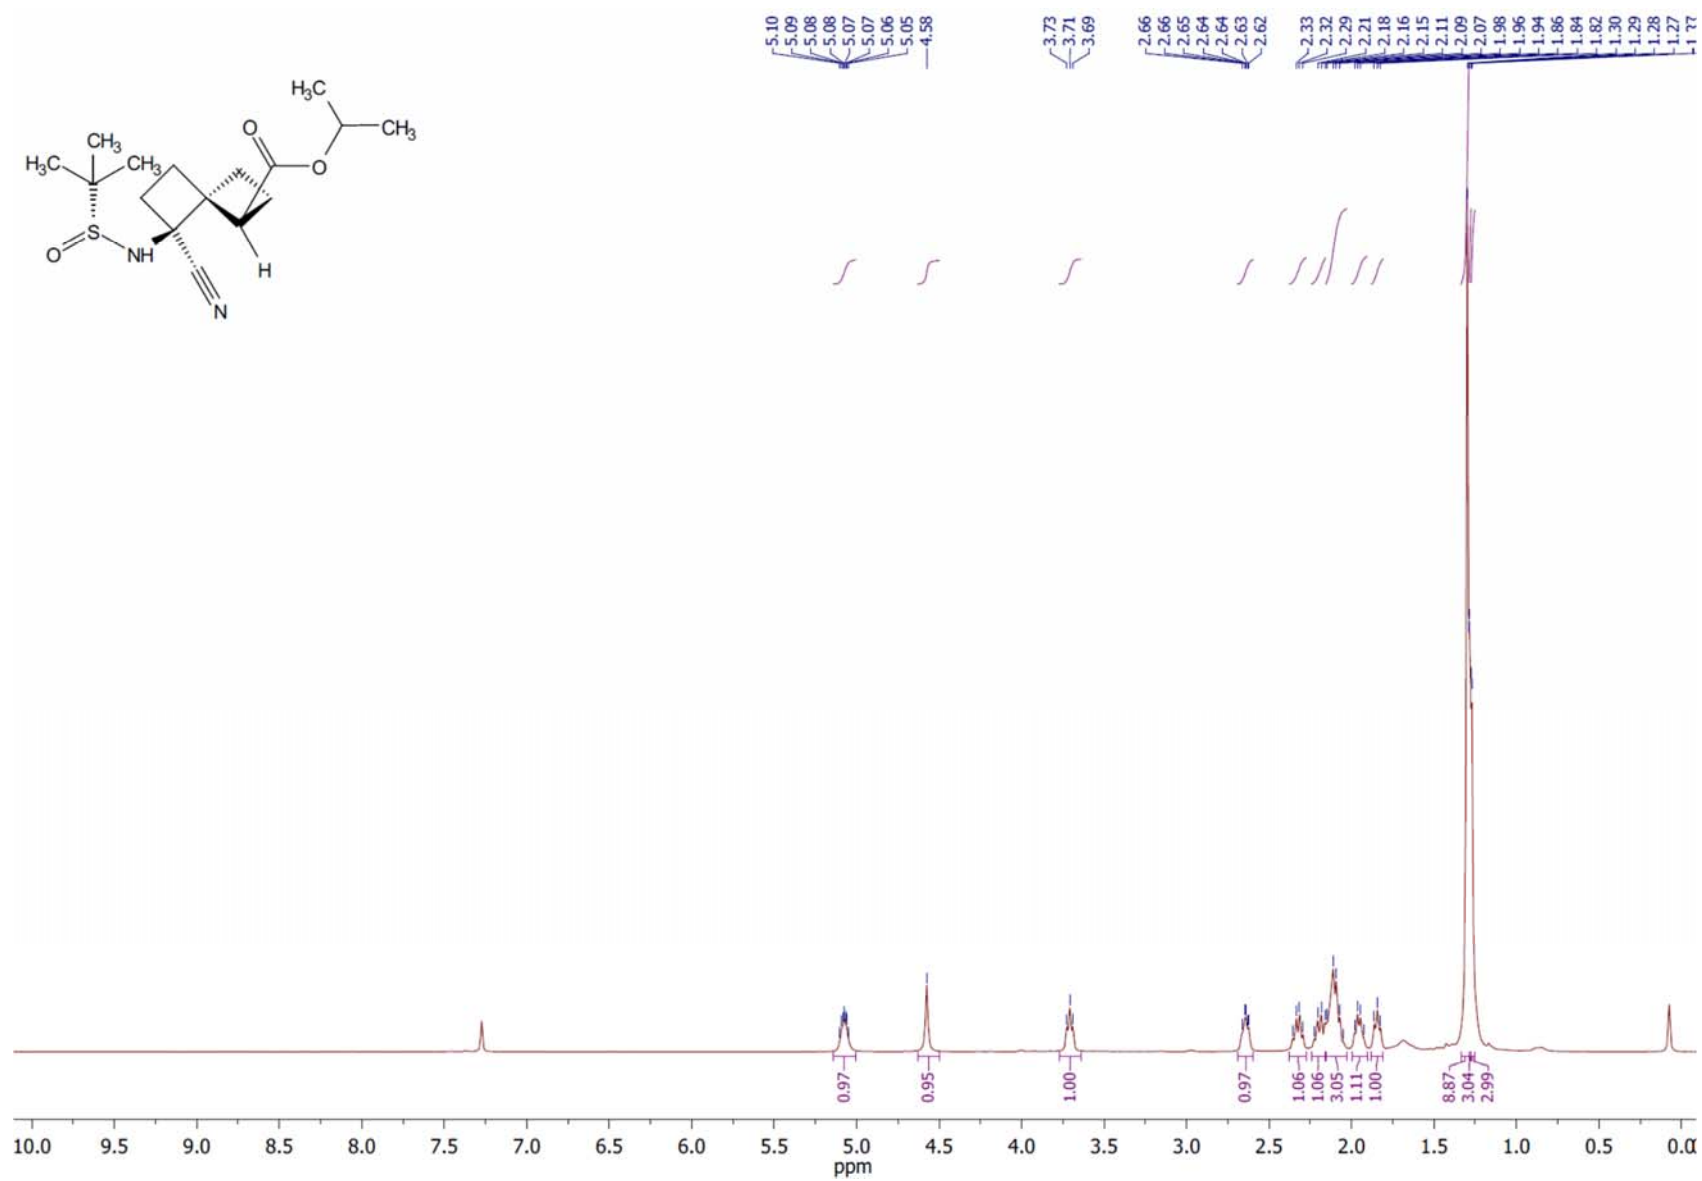

APT  $^{13}\text{C}\{^1\text{H}\}$  NMR spectrum of compound **54b**

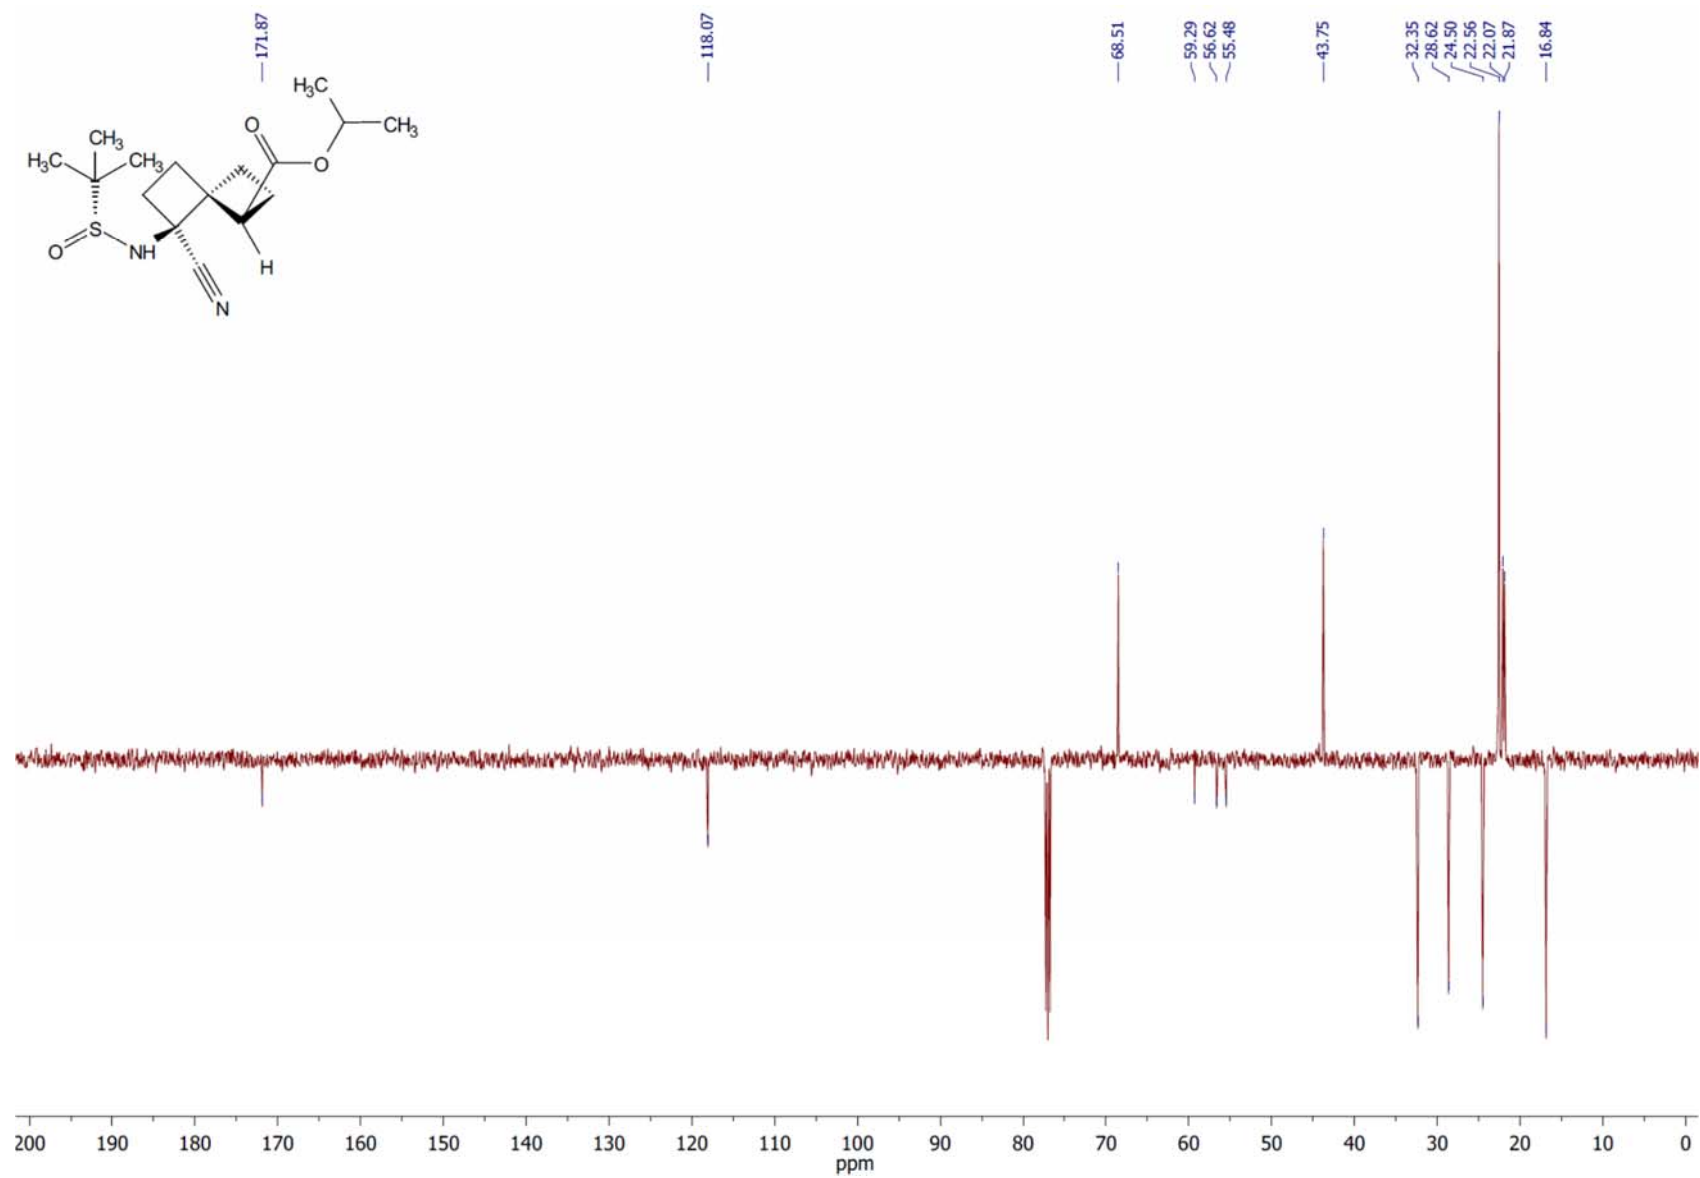

<sup>1</sup>H NMR spectrum of compound **55a**

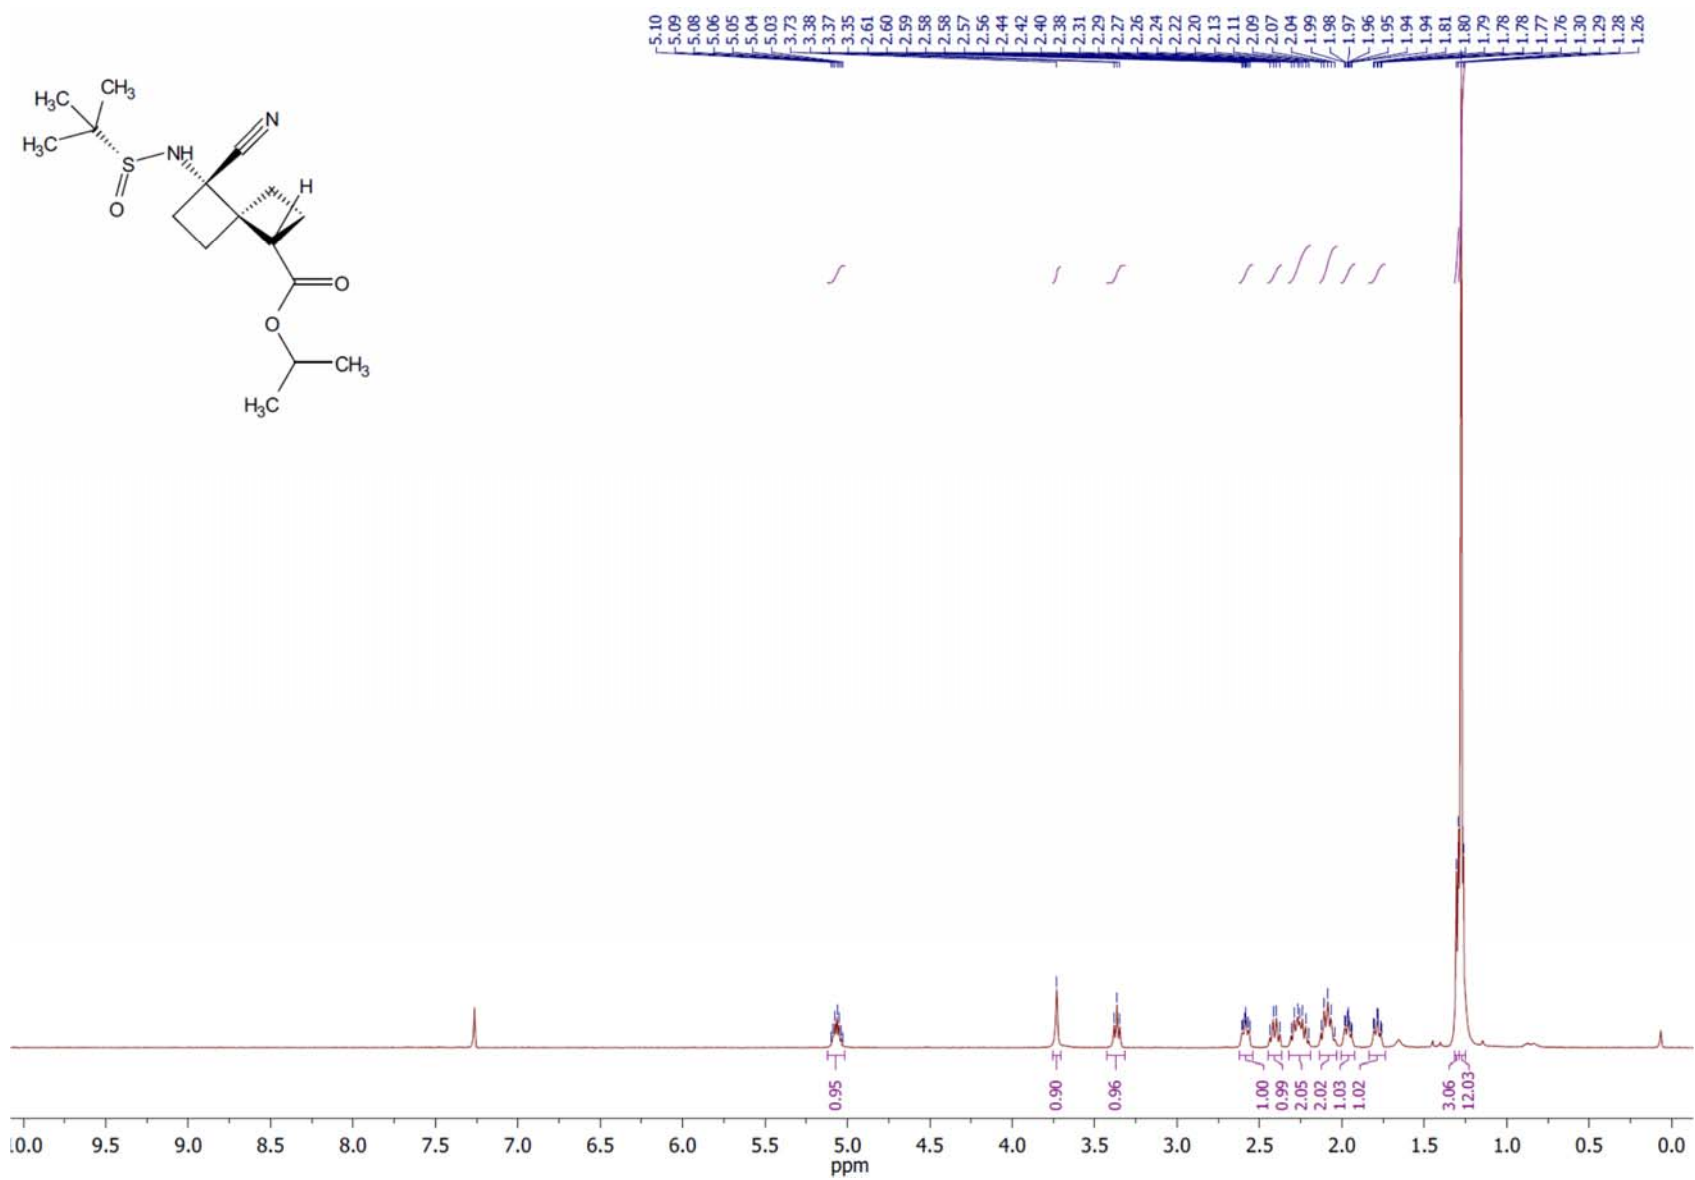

APT  $^{13}\text{C}\{^1\text{H}\}$  NMR spectrum of compound **55a**

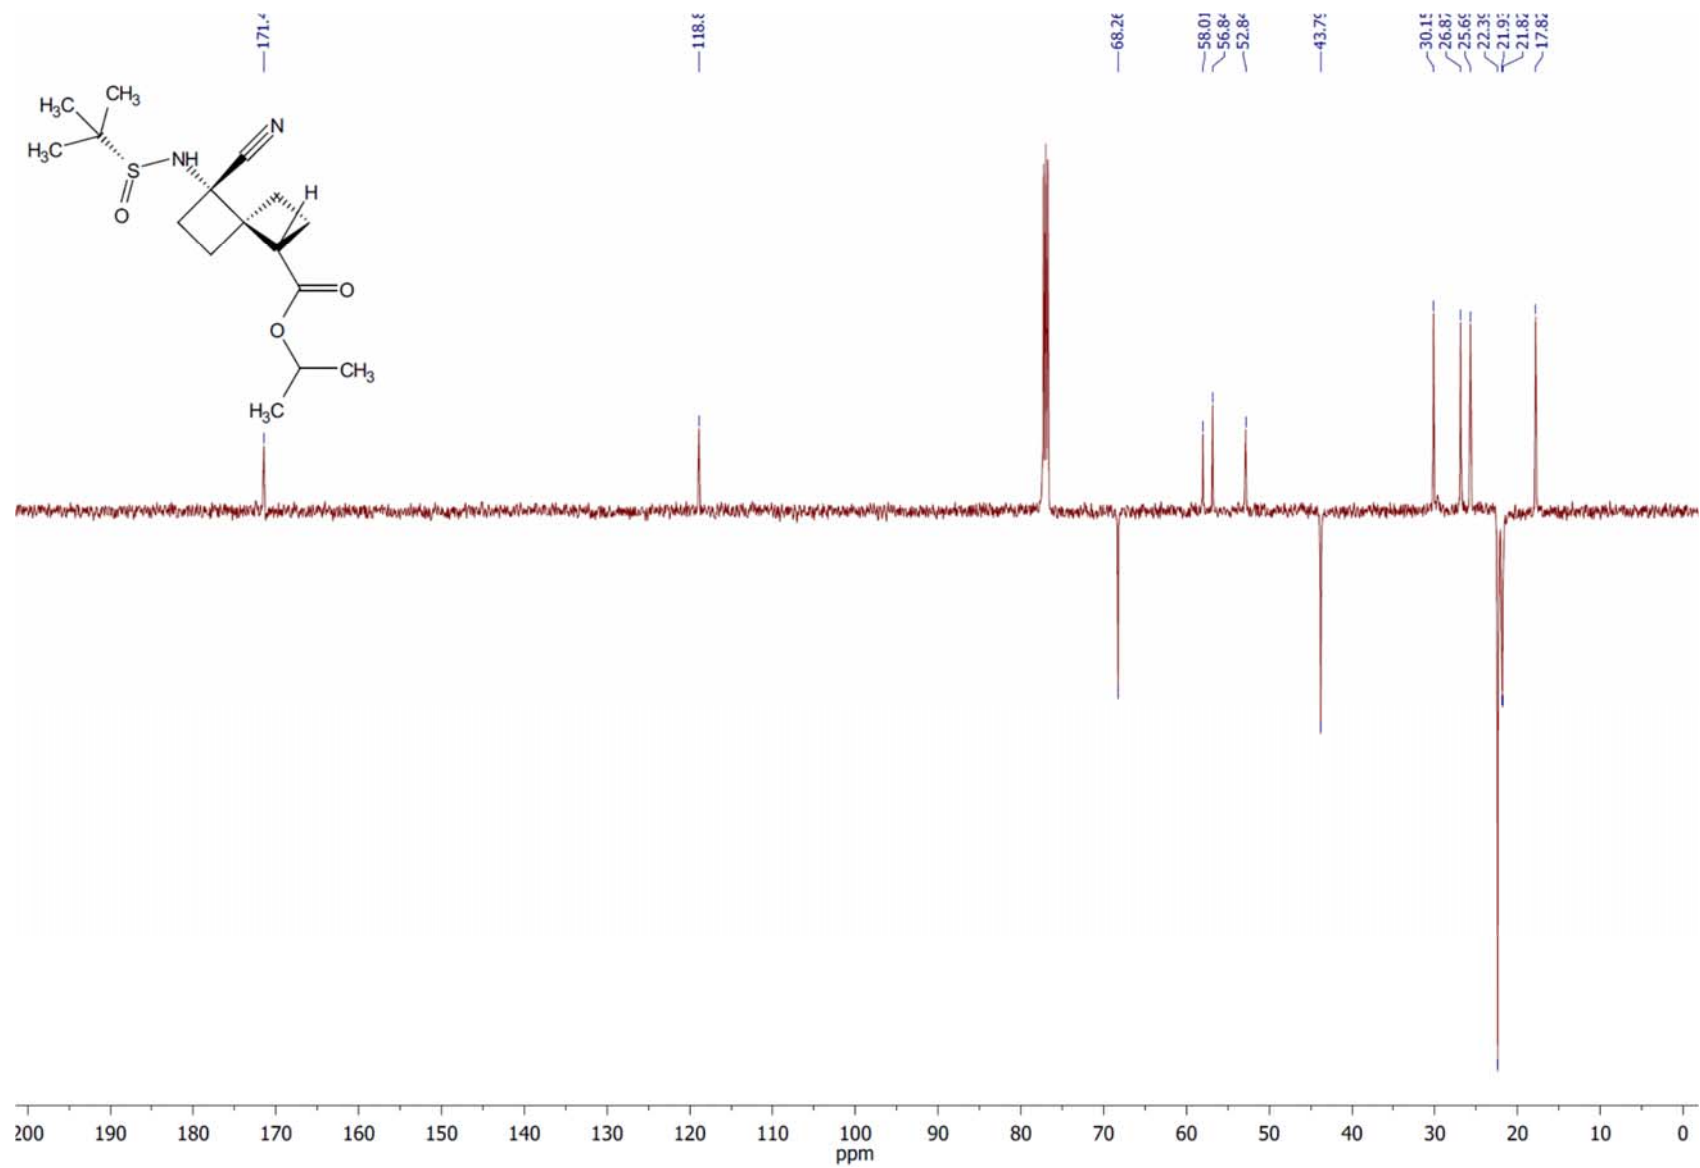



<sup>1</sup>H NMR spectrum of compound **59**

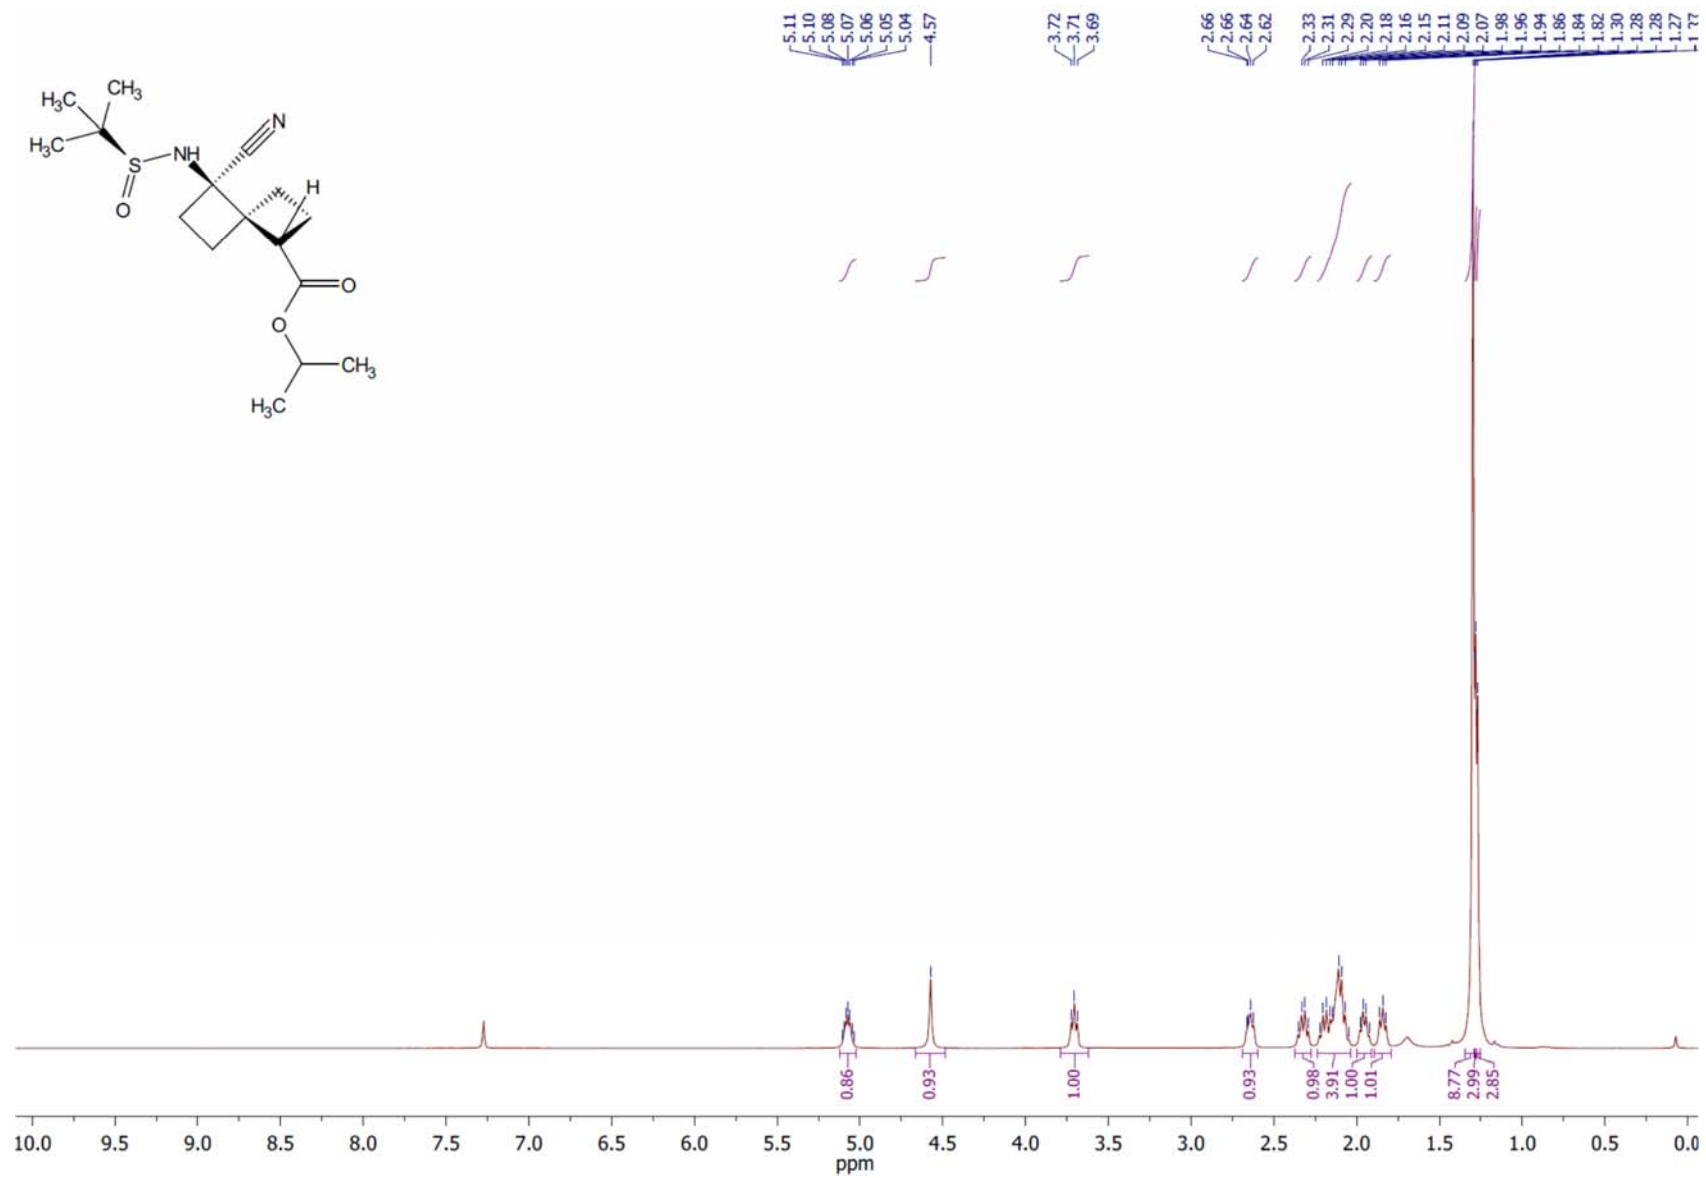

APT  $^{13}\text{C}\{^1\text{H}\}$  NMR spectrum of compound **59**

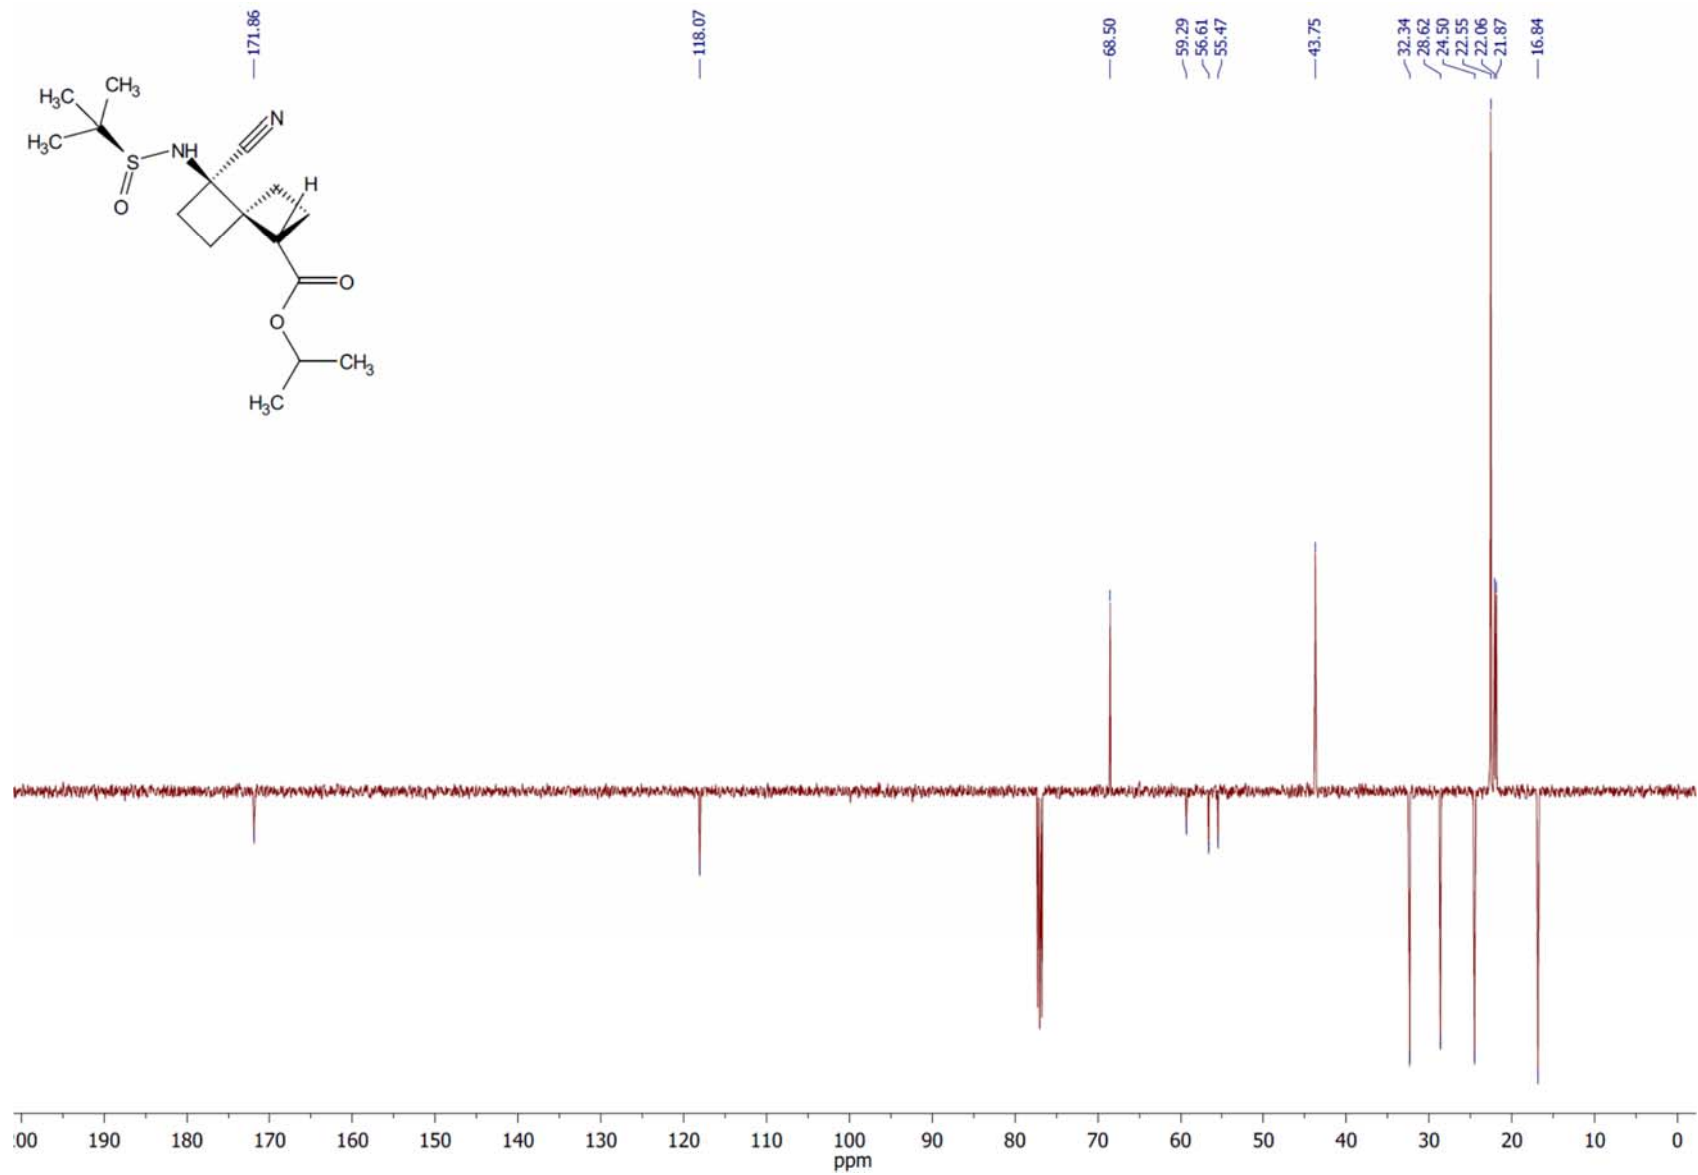

<sup>1</sup>H NMR spectrum of compound **60**

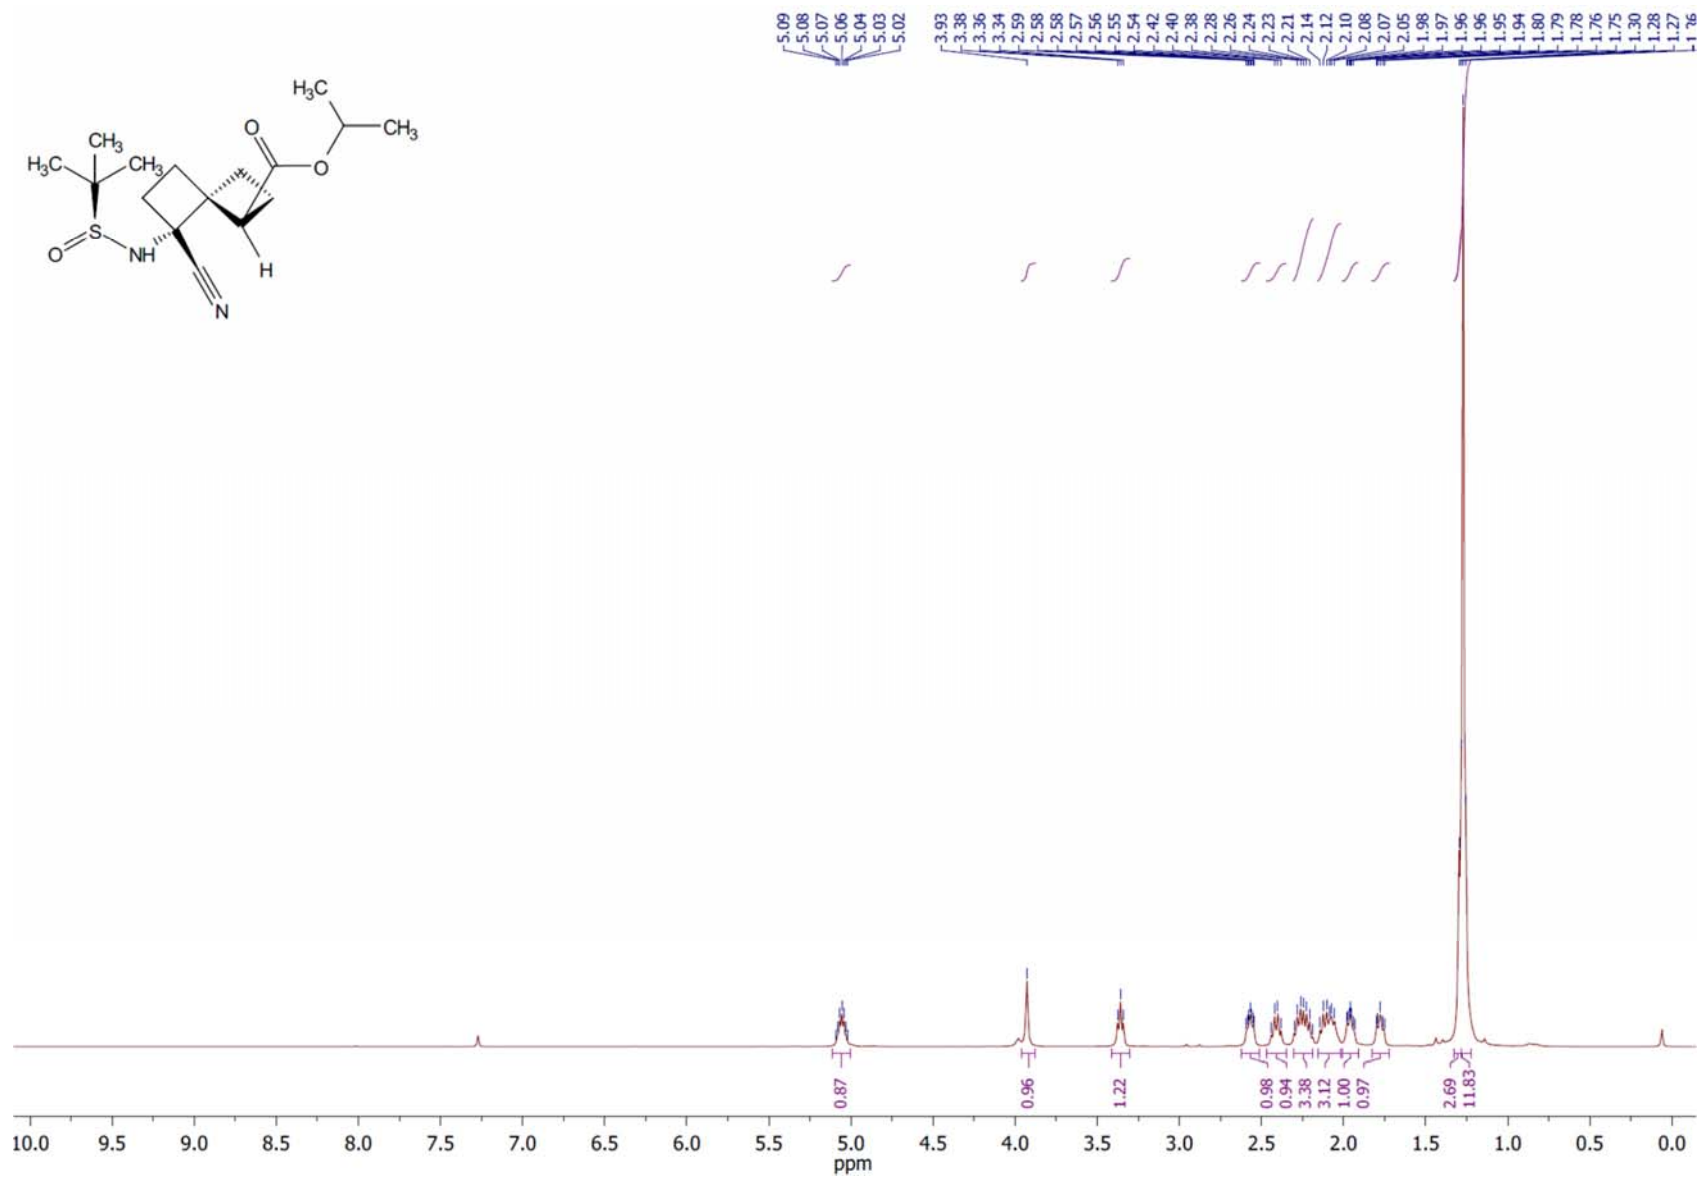

APT  $^{13}\text{C}\{^1\text{H}\}$  NMR spectrum of compound **60**

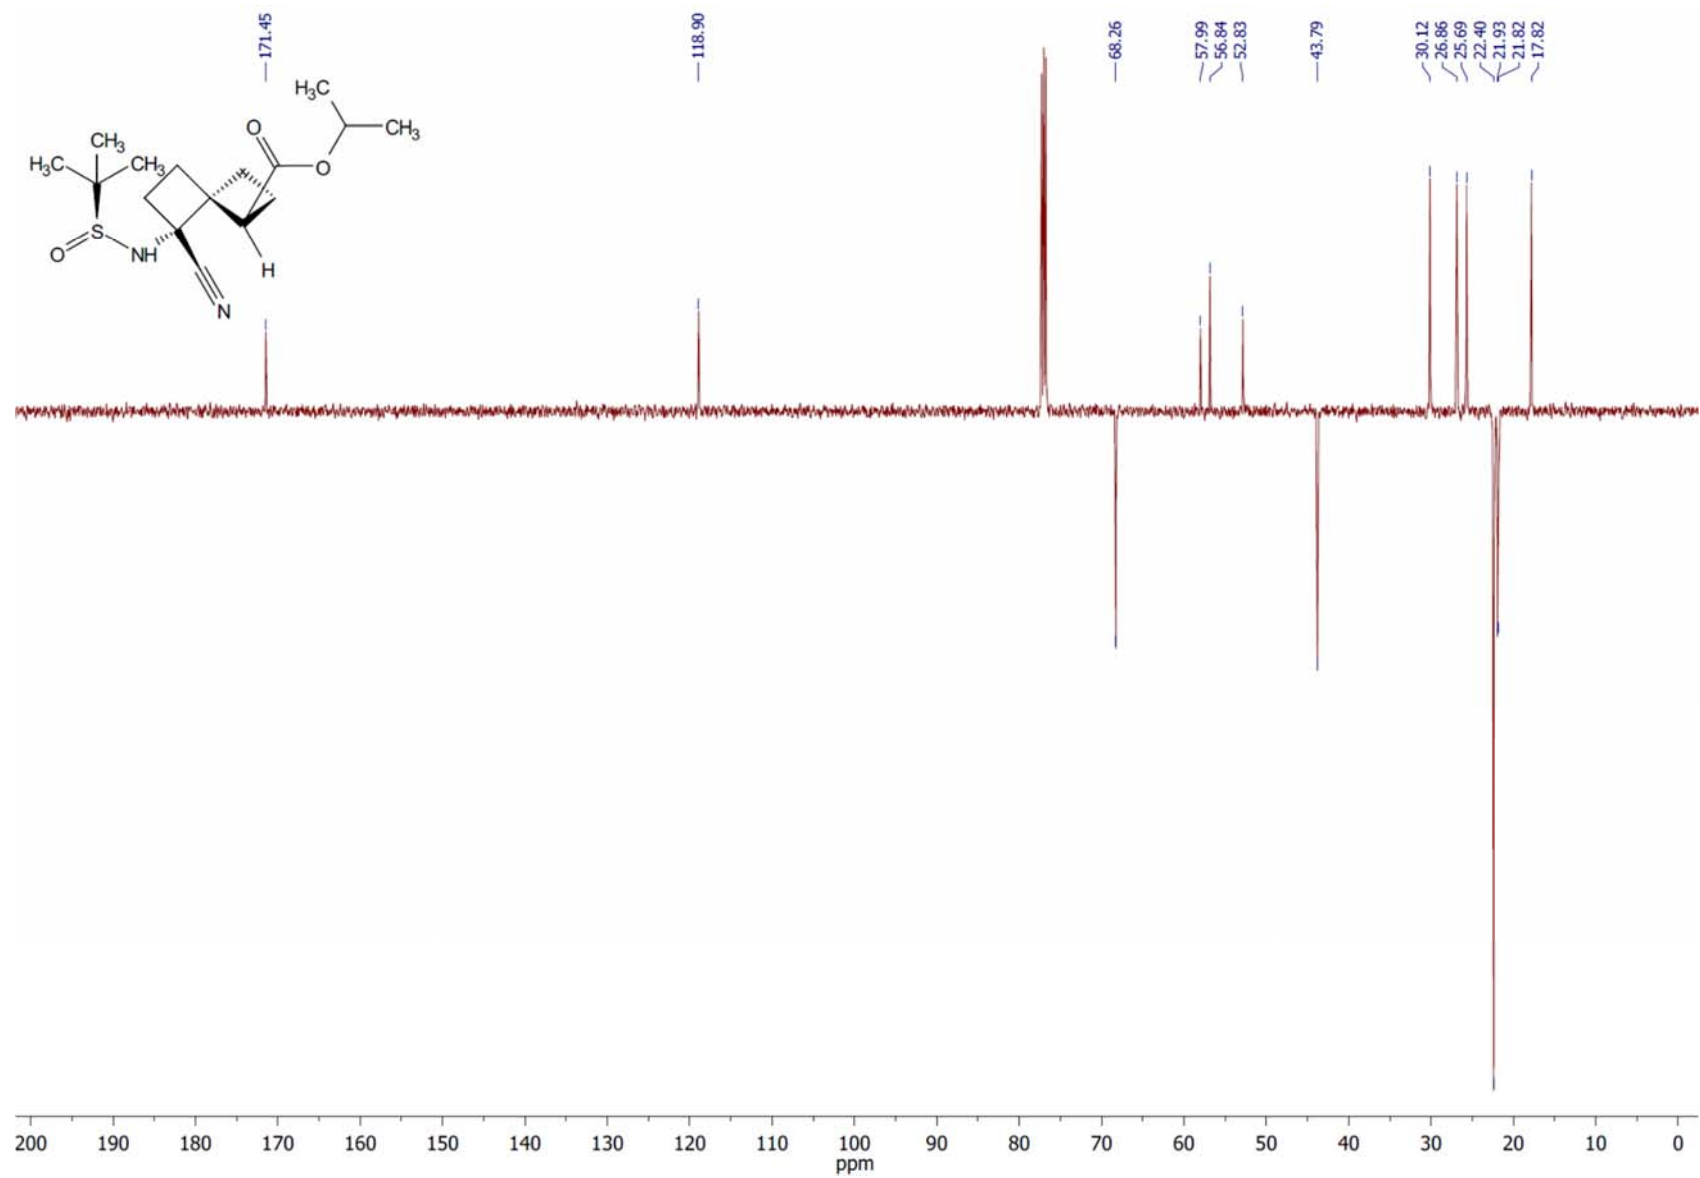

<sup>1</sup>H NMR spectrum of compound **62a**

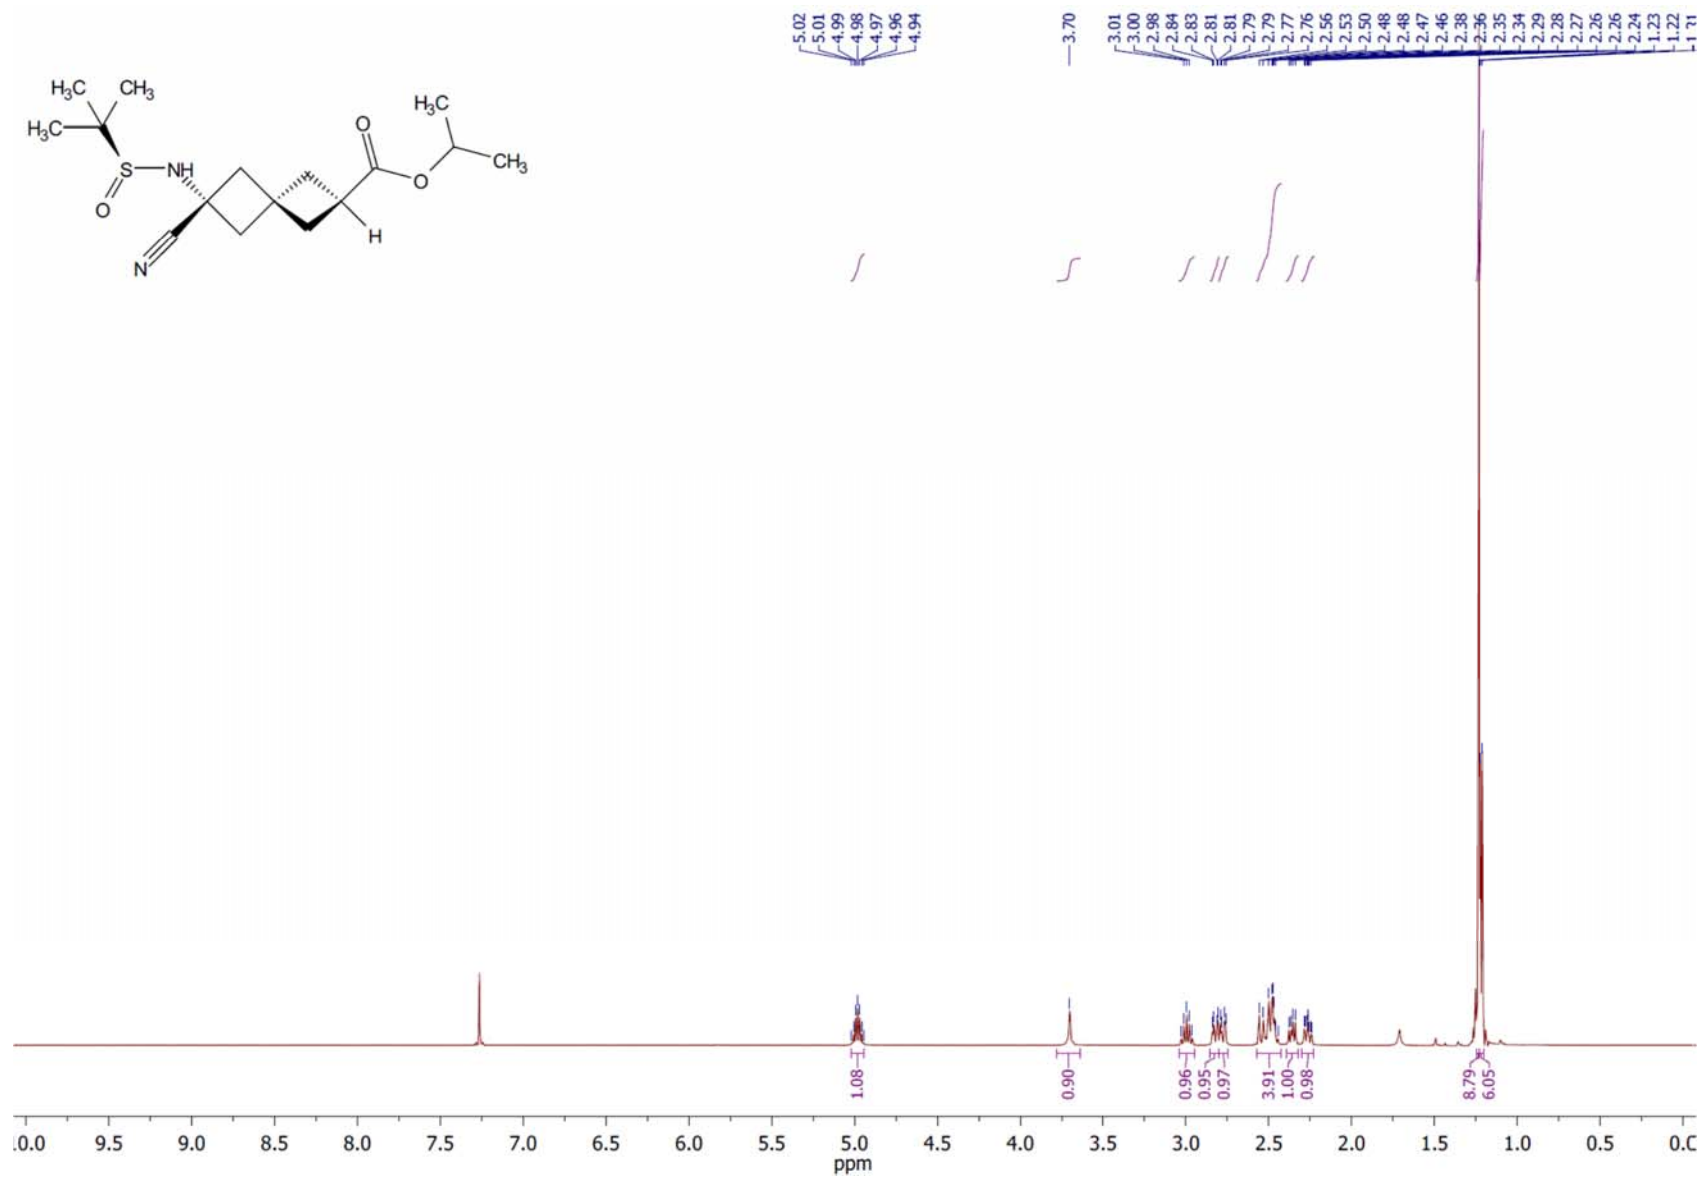

APT  $^{13}\text{C}\{^1\text{H}\}$  NMR spectrum of compound **62a**

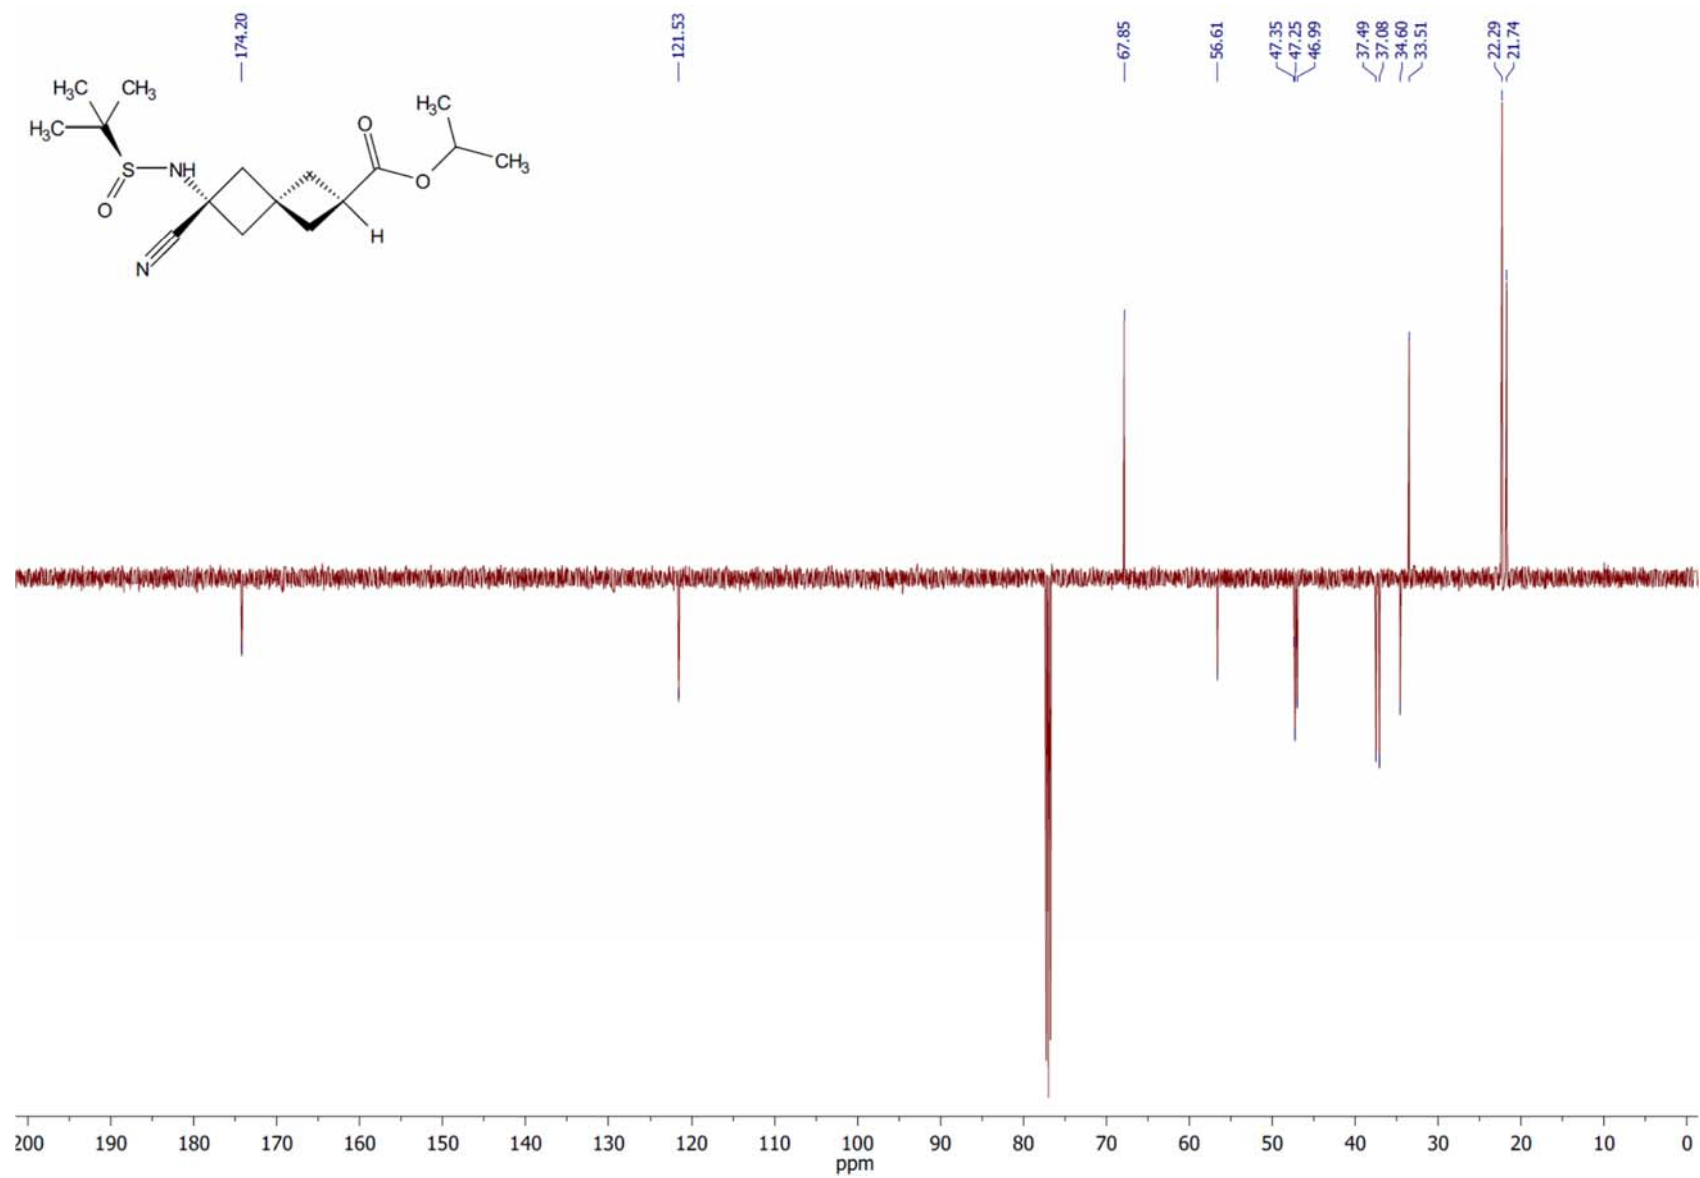

<sup>1</sup>H NMR spectrum of compound **62b**

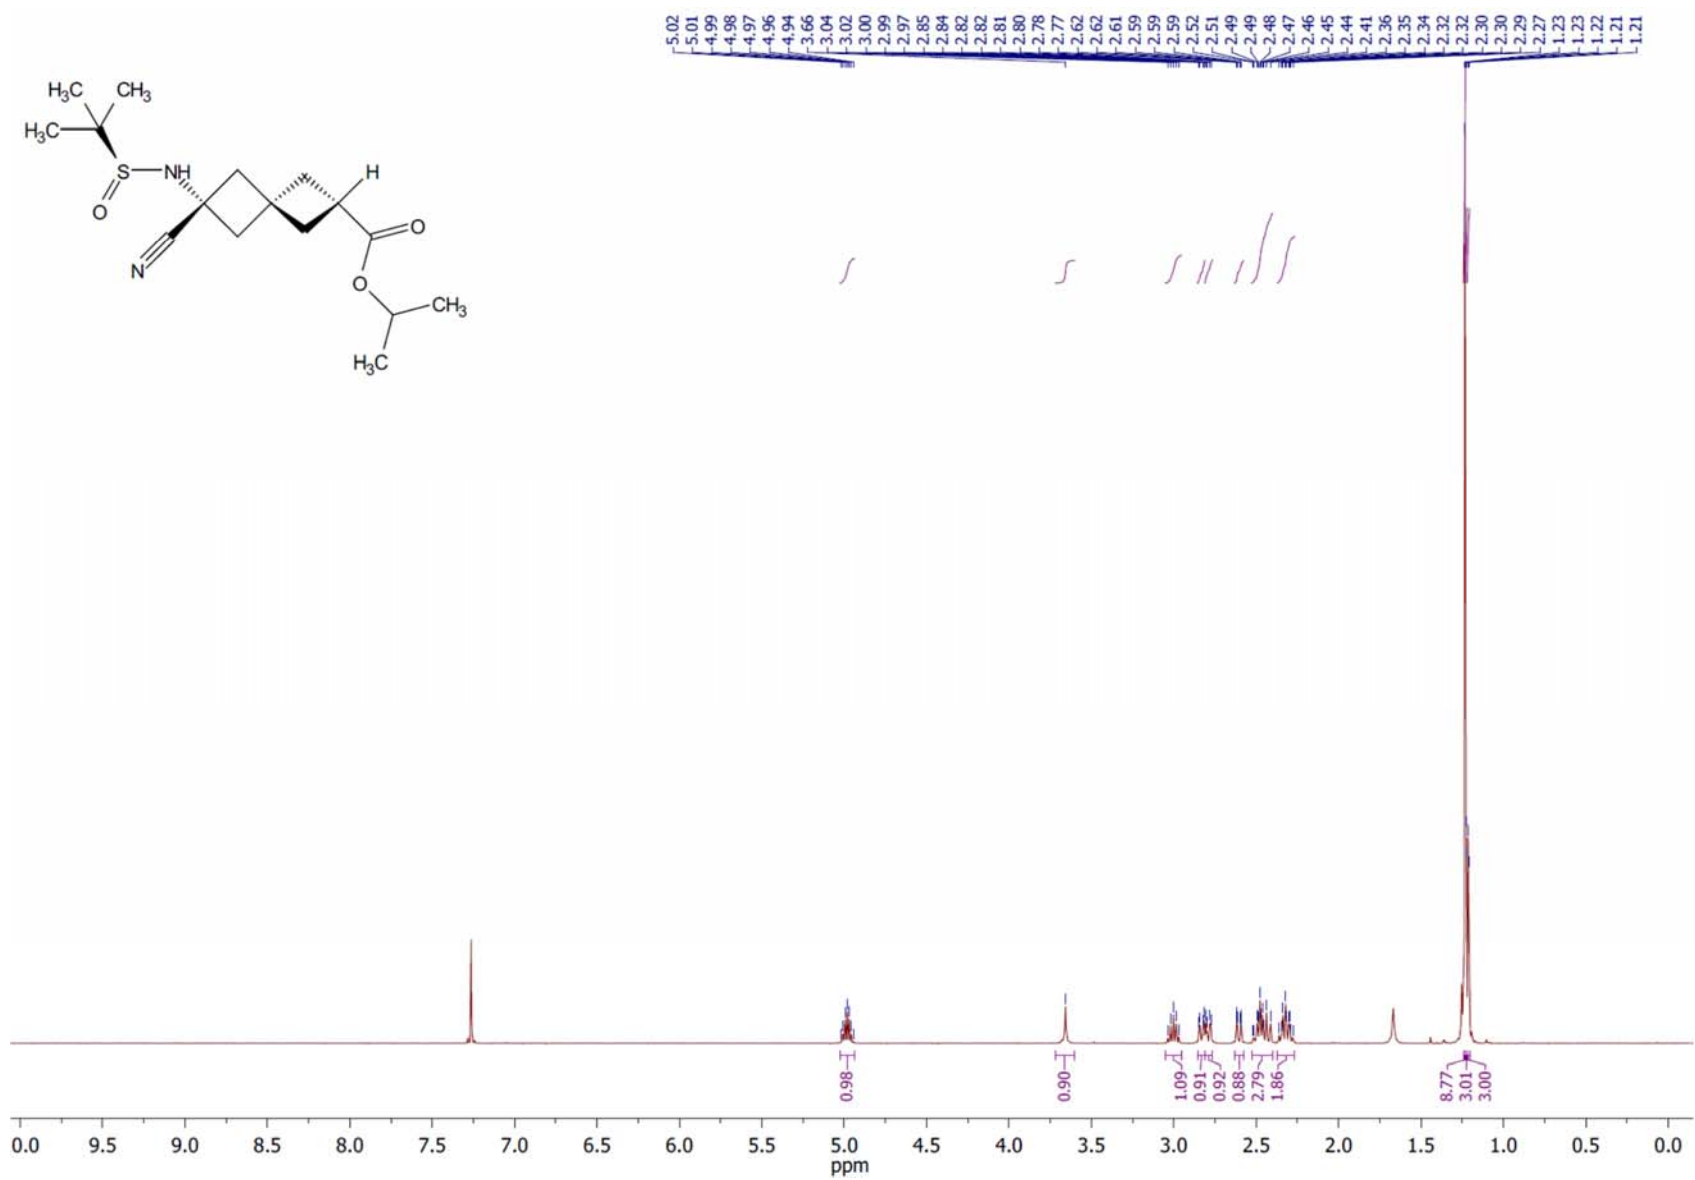

APT  $^{13}\text{C}\{^1\text{H}\}$  NMR spectrum of compound **62b**

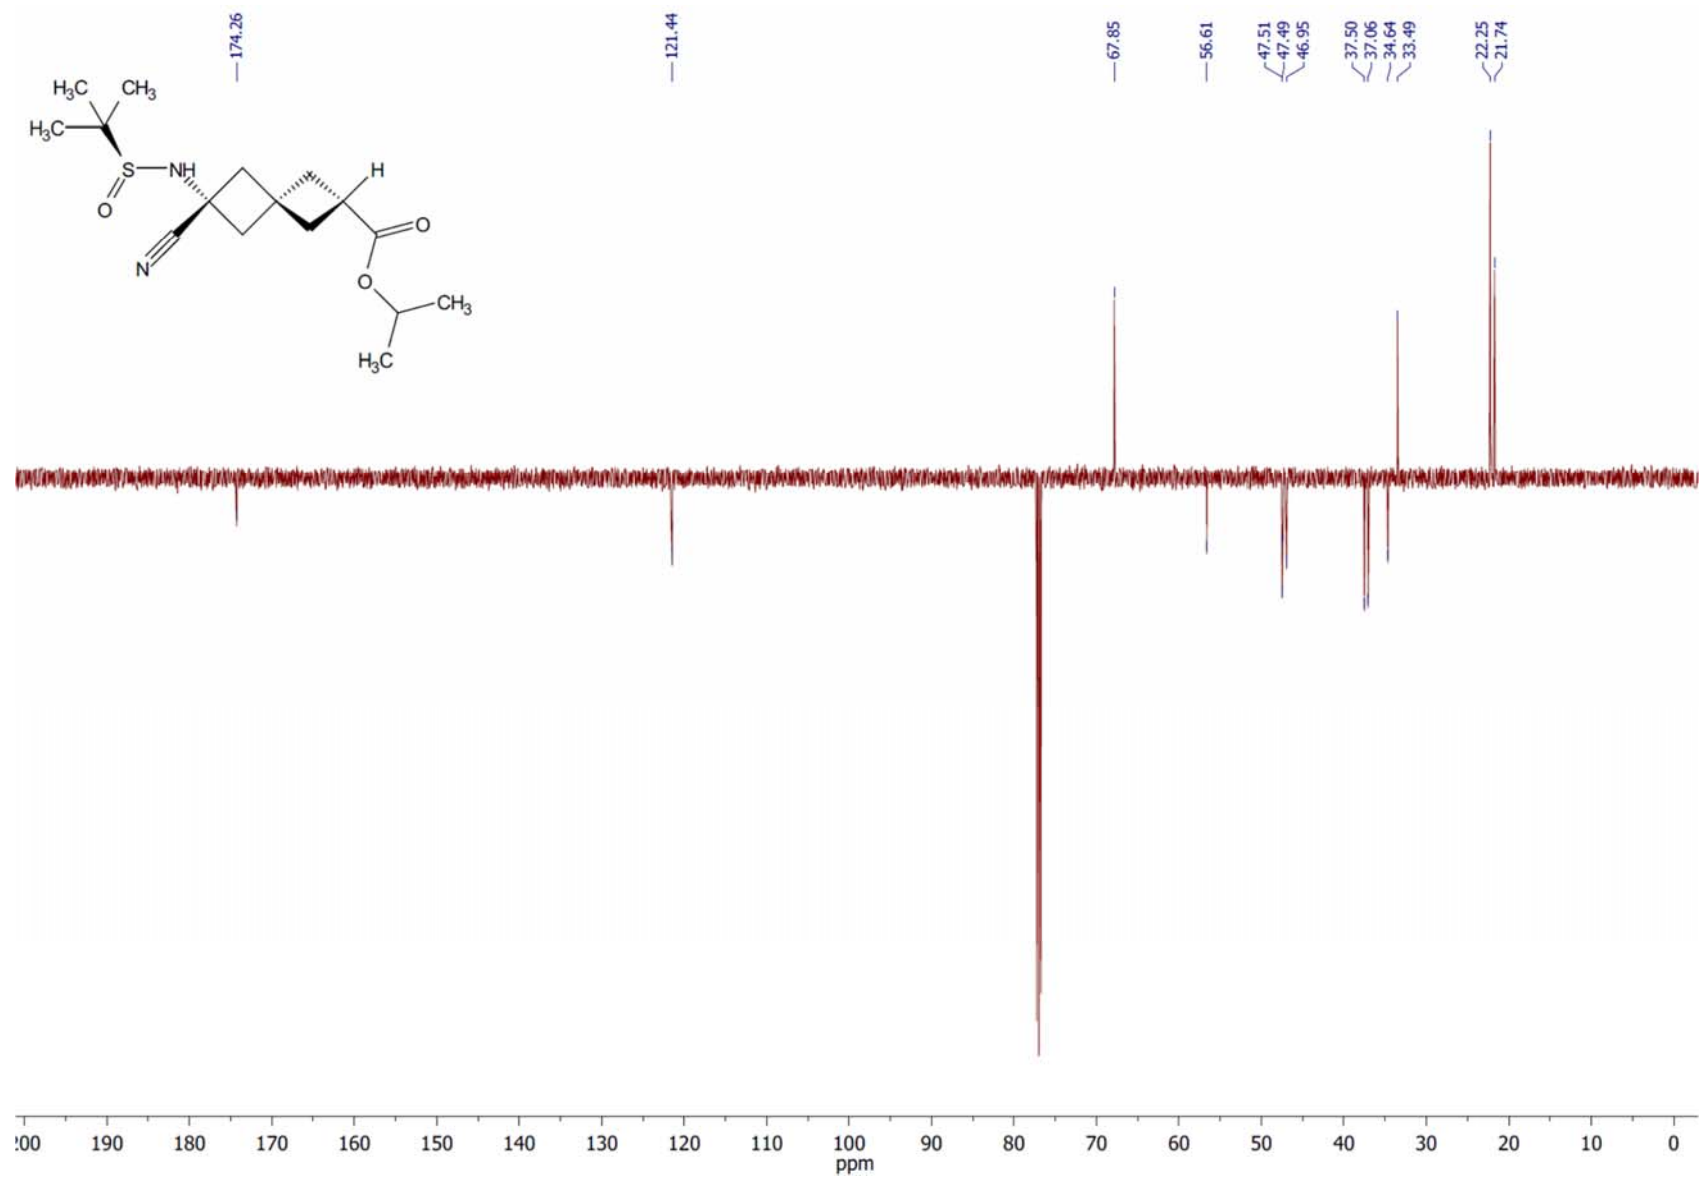



<sup>1</sup>H NMR spectrum of compound **63a**

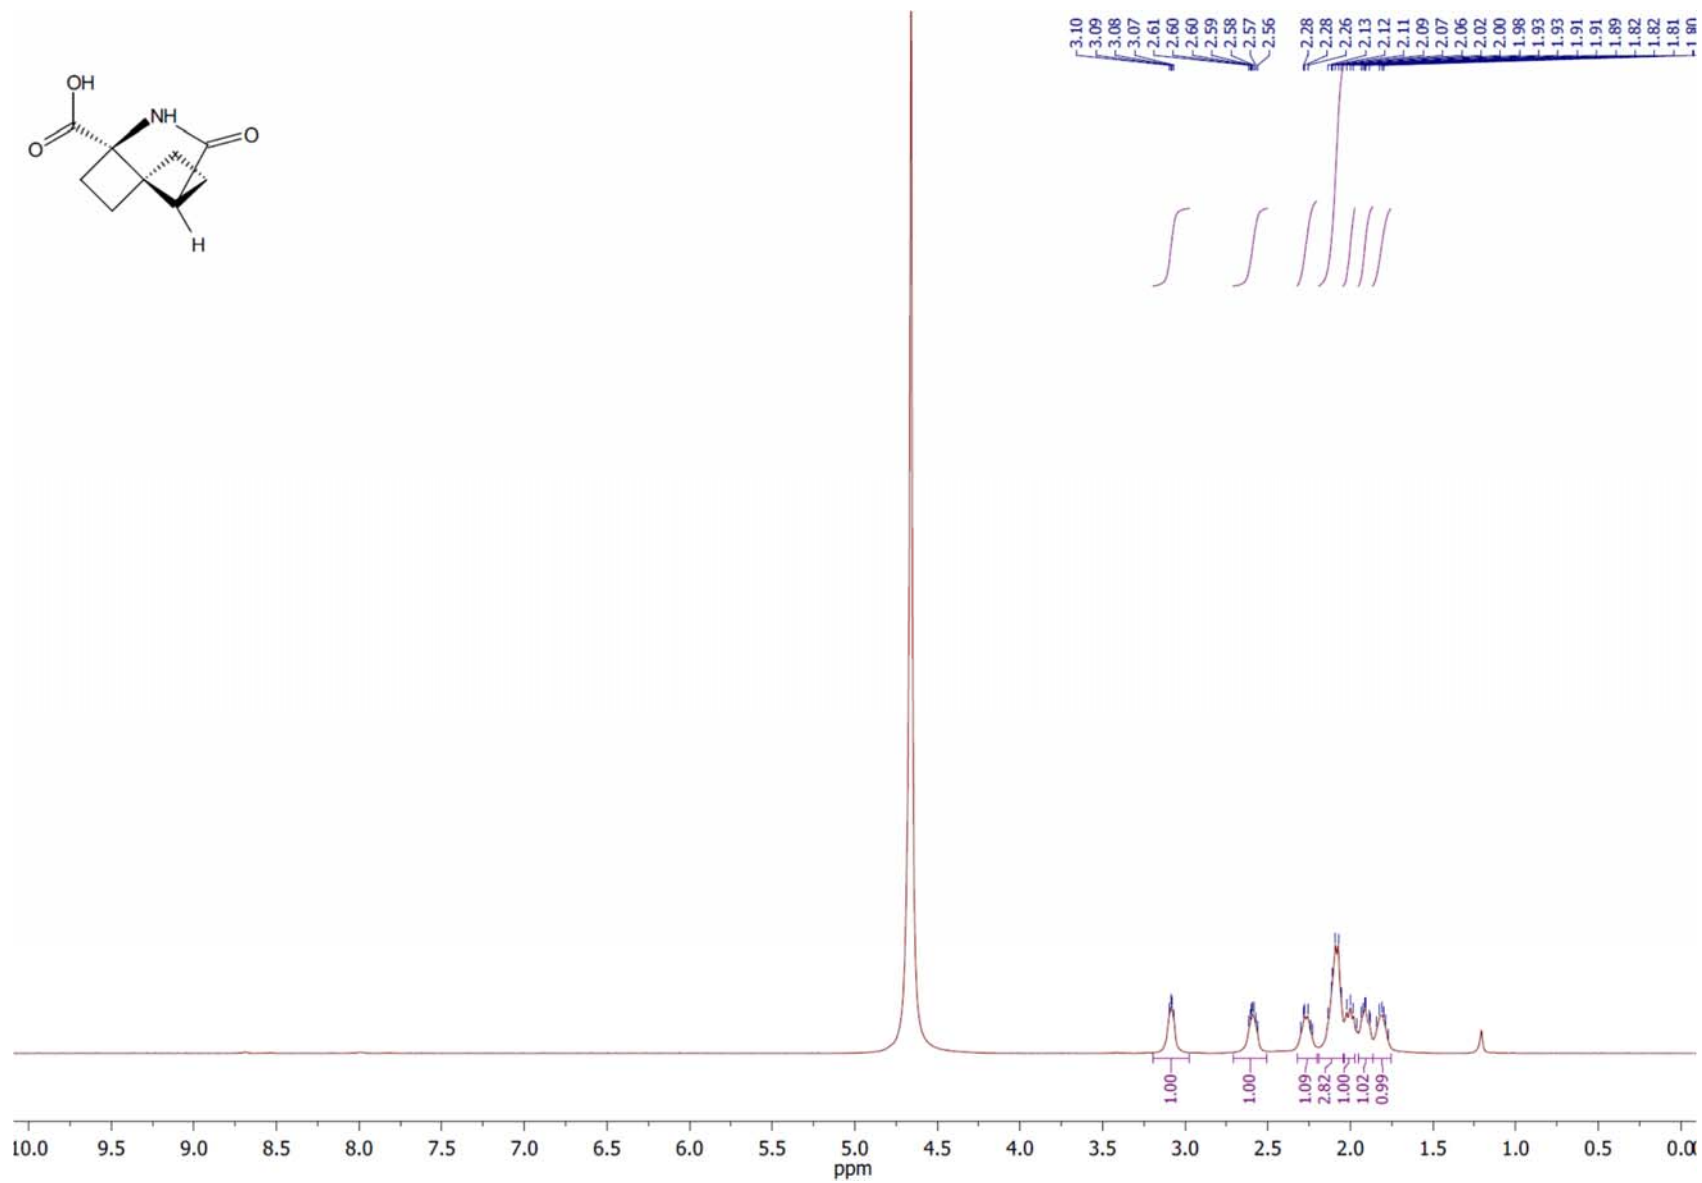

APT  $^{13}\text{C}\{^1\text{H}\}$  NMR spectrum of compound **63a**

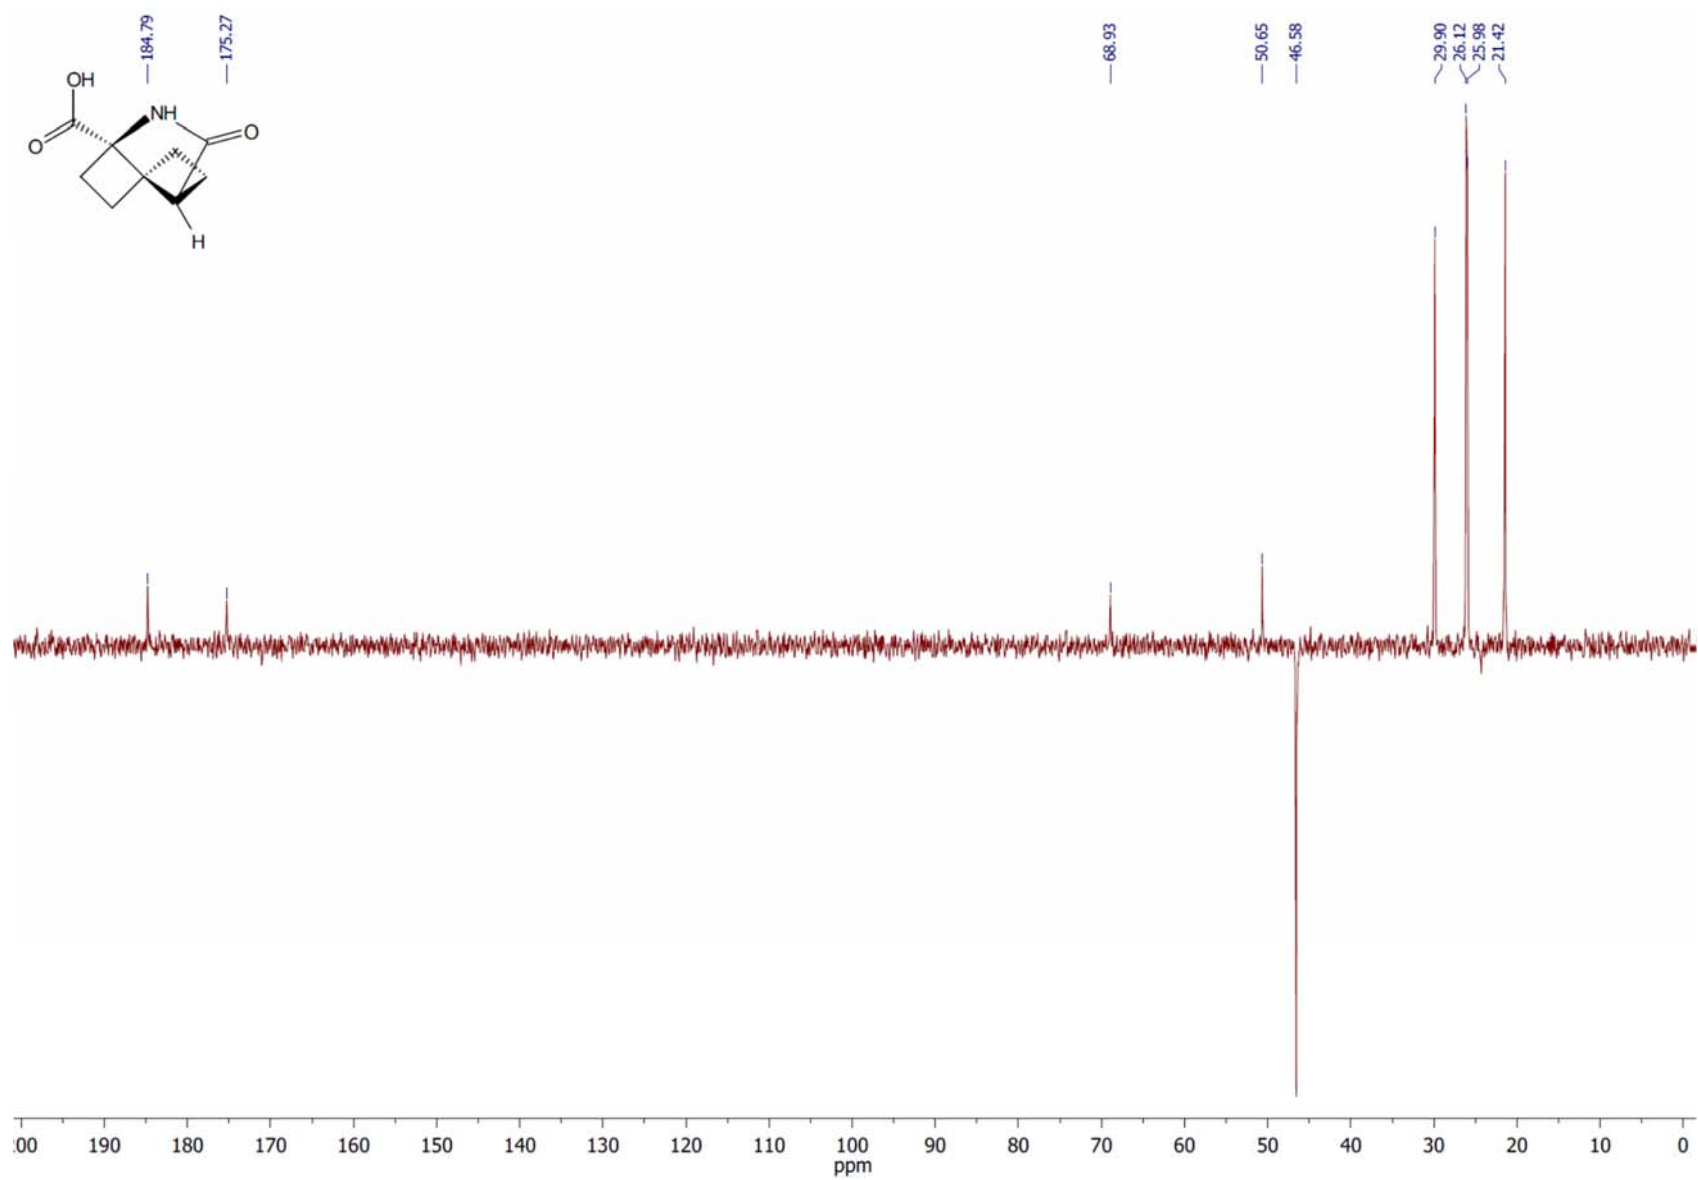

<sup>1</sup>H NMR spectrum of compound **63b**

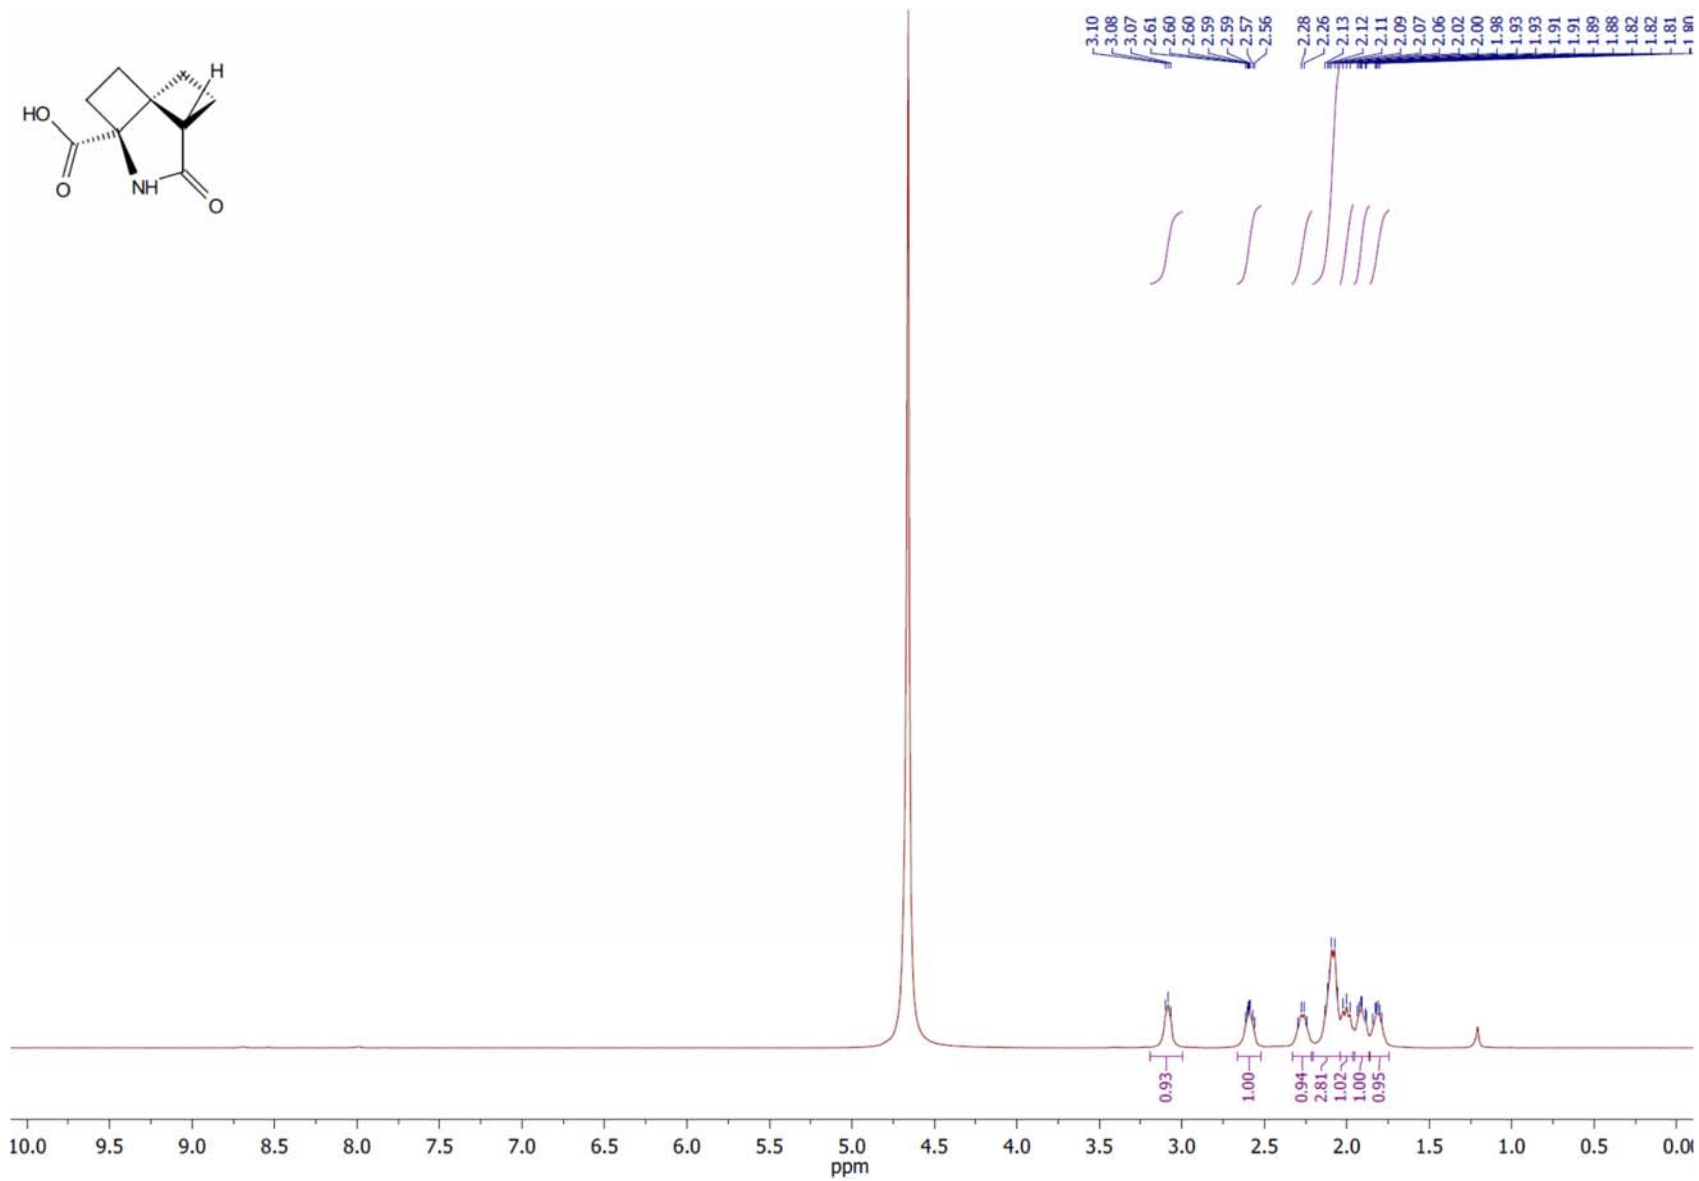

APT  $^{13}\text{C}\{^1\text{H}\}$  NMR spectrum of compound **63b**

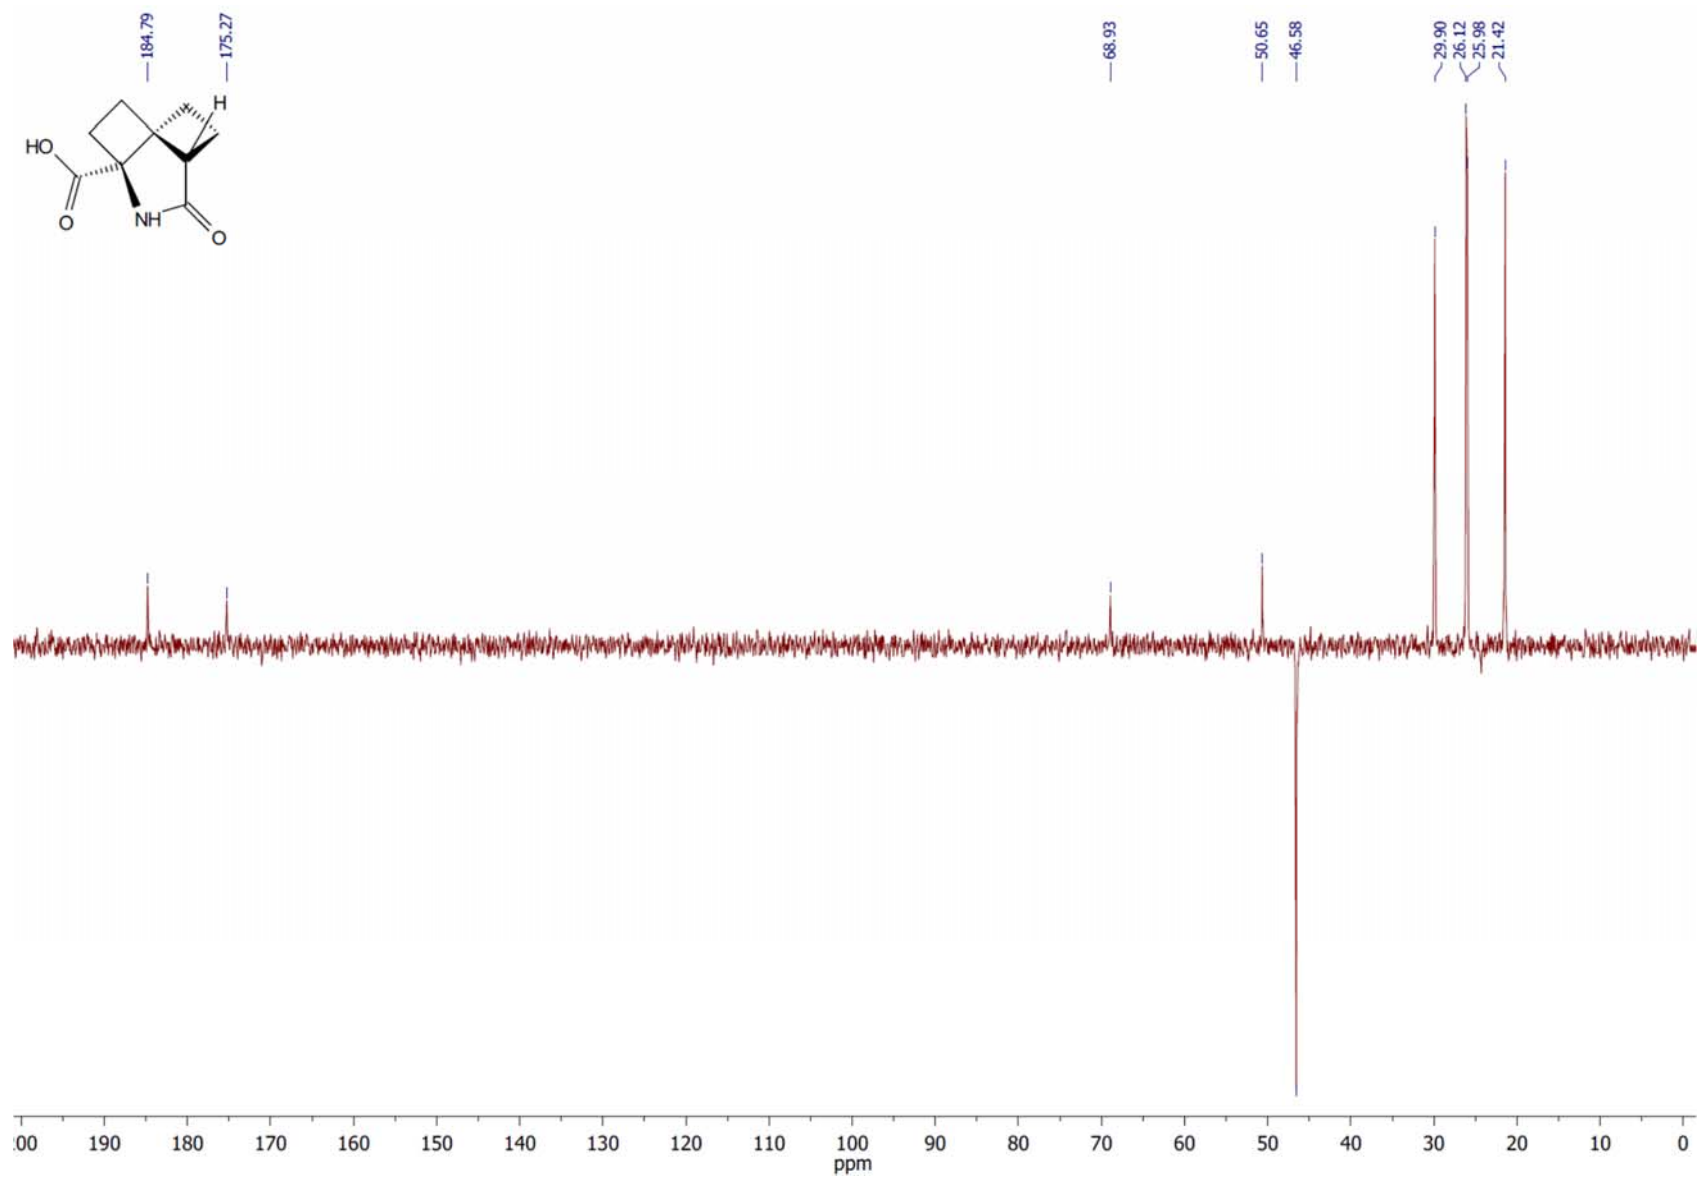

## X-Ray diffraction studies and ORTEP diagrams of compounds 50–62

**Crystal data for compound 50a:**  $C_{16}H_{26}N_2O_3S$ ,  $M = 326.45$ , monoclinic, space group  $C2$ ,  $a = 18.407(3)$ ,  $b = 6.1109(8)$ ,  $c = 18.265(2)\text{\AA}$ ,  $\beta = 118.358(4)^\circ$ ,  $V = 1808.0(4)\text{\AA}^3$ ,  $Z = 4$ ,  $d_c = 1.199\text{ g}\cdot\text{cm}^{-3}$ ,  $\mu = 0.192\text{ mm}^{-1}$ ,  $F(000) = 704$ , crystal size ca.  $0.07 \times 0.13 \times 0.52\text{ mm}$ . All crystallographic measurements were performed at 138K on a Bruker Smart Apex II diffractometer operating in the  $\omega$  scans mode. The intensity data were collected within the  $\theta_{\text{max}} \leq 25.5^\circ$  using Mo- $K\alpha$  radiation ( $\lambda = 0.71073\text{ \AA}$ ). The intensities of 9459 reflections were collected (3160 unique reflections,  $R_{\text{merge}} = 0.0333$ ). The structure was solved by direct methods and refined by the full-matrix least-squares technique in the anisotropic approximation for non-hydrogen atoms using the Bruker SHELXTL program package.<sup>1</sup> All CH hydrogen atoms were placed at calculated positions and refined as 'riding' model,

and NH hydrogen was found in DF synthesis of the electron density maps and refined isotropically. The solvate water molecule could not be modeled satisfactorily thus SQUEEZE routine in the PLATON software<sup>[2,3]</sup> were applied for correction of the data. Convergence was obtained at  $R_1 = 0.0332$  and  $wR_2 = 0.0715$  for 2877 observed reflections with  $I \geq 2\sigma(I)$ ,  $R_1 = 0.0388$  and  $wR_2 = 0.0739$ , GOF = 1.047 for 3160 independent reflections, 203 parameters, Flack parameter = 0.02(4), the largest and minimal peaks in the final difference map 0.21 and  $-0.16\text{ e}/\text{\AA}^3$ . Full crystallographic details have been deposited at Cambridge Crystallographic Data Centre (CCDC). Any request to the CCDC for these materials should quote the full literature citation and reference number CCDC 2108576. The molecular structure of compound 50a is shown in Figure S1.

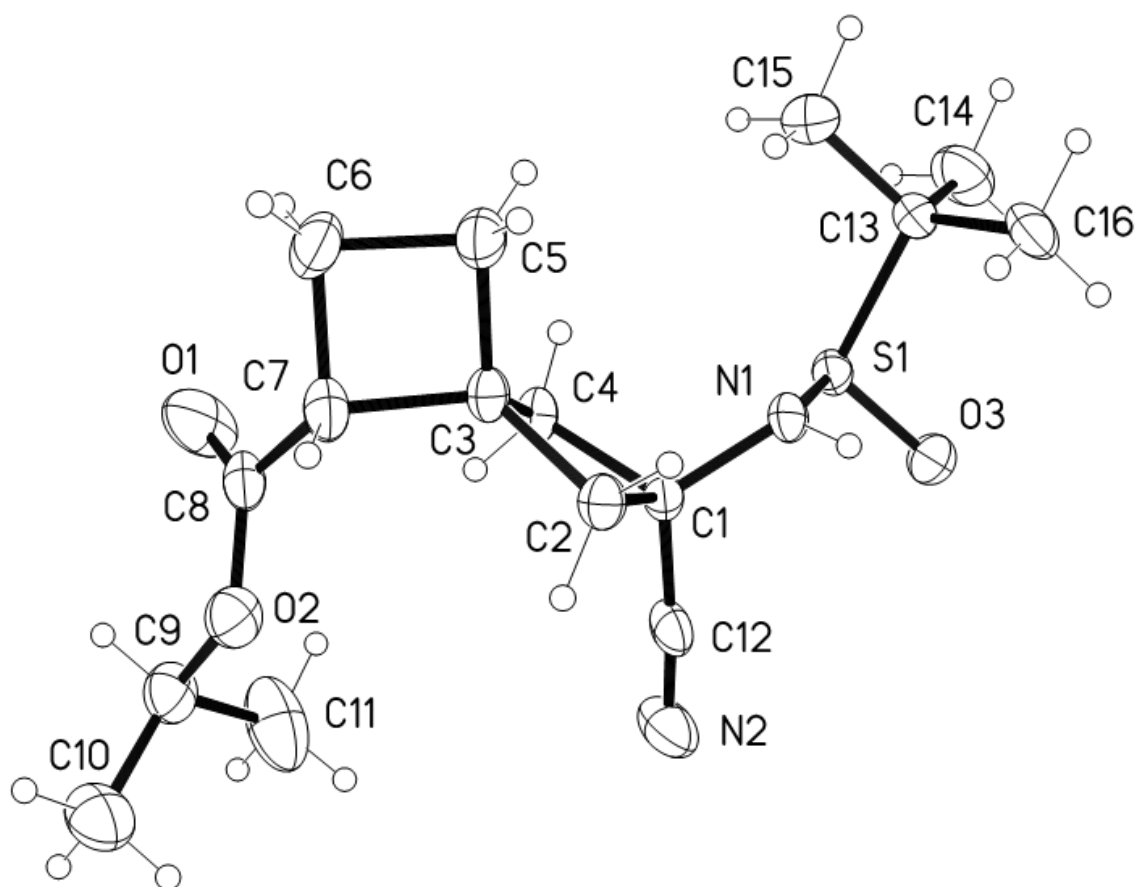

**Figure S1.** ORTEP diagram of compound 50a including thermal displacement ellipsoids with 50% probability.

**Crystal data for compound 50b:** C<sub>16</sub>H<sub>26</sub>N<sub>2</sub>O<sub>3</sub>S, M = 326.45, monoclinic, space group *P2<sub>1</sub>*, *a* = 10.091(3), *b* = 6.9401(17), *c* = 13.251(3) Å,  $\beta$  = 93.847(10)°, *V* = 925.9(4) Å<sup>3</sup>, *Z* = 2, *d<sub>c</sub>* = 1.171 g·cm<sup>-3</sup>,  $\mu$  = 0.188 mm<sup>-1</sup>, *F*(000) = 352, crystal size ca. 0.07 × 0.25 × 0.50 mm. All crystallographic measurements were performed at 173 K on a Bruker Smart Apex II diffractometer operating in the  $\omega$  scans mode. The intensity data were collected within the  $\theta_{\max} \leq 26.6^\circ$  using Mo-K $\alpha$  radiation ( $\lambda = 0.71073$  Å). The intensities of 14193 reflections were collected (3777 unique reflections, *R<sub>merge</sub>* = 0.0511). The structure was solved by direct methods and refined by the full-matrix least-squares technique in the anisotropic approximation for non-hydrogen atoms using the Bruker SHELXTL program package.<sup>1</sup> All CH hydrogen

atoms were placed at calculated positions and refined as 'riding' model, and NH hydrogen was found in DF synthesis of the electron density maps and refined isotropically. Convergence was obtained at *R*<sub>1</sub> = 0.0450 and *wR*<sub>2</sub> = 0.0988 for 3118 observed reflections with  $I \geq 2\sigma(I)$ , *R*<sub>1</sub> = 0.0591 and *wR*<sub>2</sub> = 0.1064, GOF = 1.055 for 3777 independent reflections, 197 parameters, Flack parameter = 0.01(6), the largest and minimal peaks in the final difference map 0.26 and -0.25 e/Å<sup>3</sup>. Full crystallographic details have been deposited at Cambridge Crystallographic Data Centre (CCDC). Any request to the CCDC for these materials should quote the full literature citation and reference number CCDC 2108577. The molecular structure of compound **50b** is shown in Figure S2.

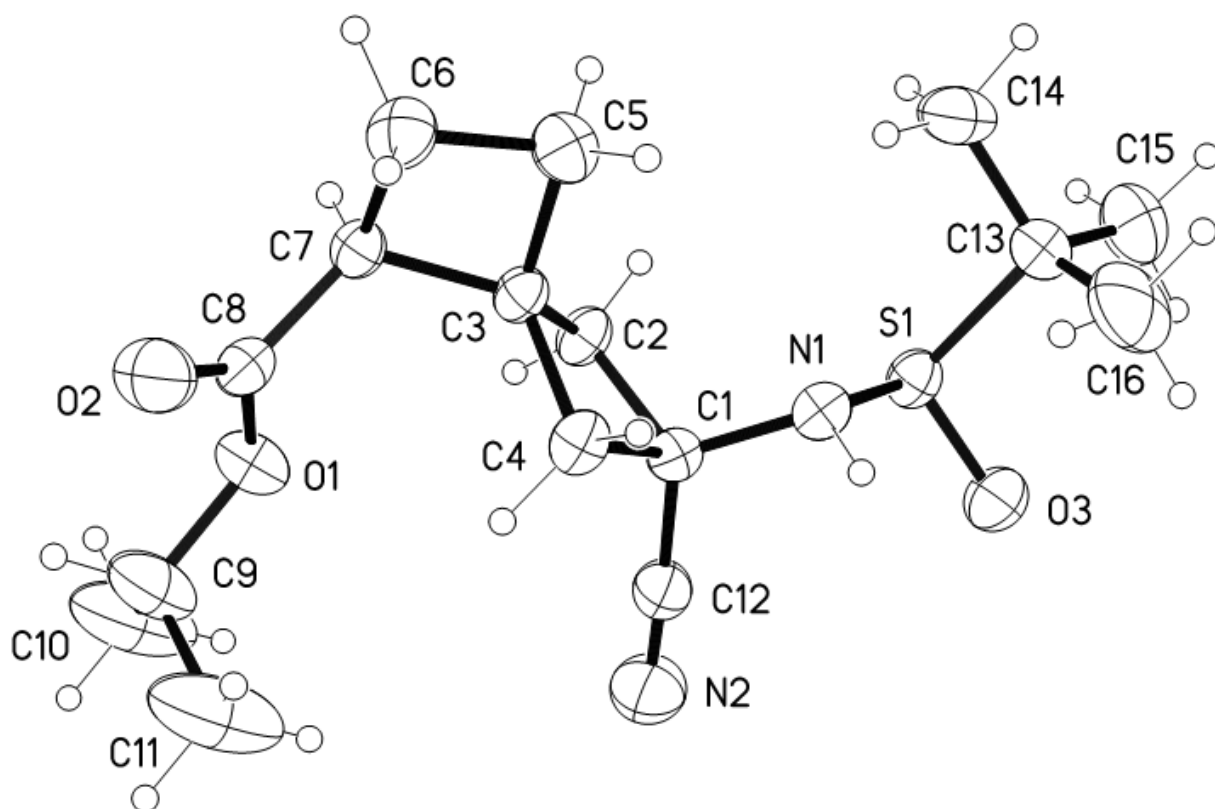

**Figure S2.** ORTEP diagram of compound **50b** including thermal displacement ellipsoids with 50% probability

**Crystal data for compound 51a:** C<sub>16</sub>H<sub>26</sub>N<sub>2</sub>O<sub>3</sub>S, M = 326.45, monoclinic, space group *P2<sub>1</sub>*, *a* = 9.675(2), *b* = 8.970(2), *c* = 11.079(3) Å,  $\beta$  = 112.311(9)°, *V* = 889.5(4) Å<sup>3</sup>, *Z* = 2, *d<sub>c</sub>* = 1.219 g·cm<sup>-3</sup>,  $\mu$  = 0.195 mm<sup>-1</sup>, *F*(000) = 352, crystal size ca. 0.38 × 0.43 × 0.48 mm. All crystallographic measurements were performed at 173 K on a Bruker Smart Apex II diffractometer operating in the  $\omega$  scans mode. The intensity data were collected within the  $\theta_{\max} \leq 25.05^\circ$  using Mo-K $\alpha$  radiation ( $\lambda$  = 0.71073 Å). The intensities of 8575 reflections were collected (3026 unique reflections, *R<sub>meR<sub>g</sub></sub>* = 0.0261). The structure was solved by direct methods and refined by the full-matrix least-squares technique in the anisotropic approximation for non-hydrogen atoms using the Bruker SHELXTL program package.<sup>1</sup> All CH hydrogen atoms were

placed at calculated positions and refined as 'riding' model, and NH hydrogen atom was found in DF synthesis of the electron density maps and refined isotropically. Convergence was obtained at *R<sub>1</sub>* = 0.0310 and *wR<sub>2</sub>* = 0.0784 for 2903 observed reflections with *I* ≥ 2σ(*I*), *R<sub>1</sub>* = 0.0331 and *wR<sub>2</sub>* = 0.0799, GOF = 1.002 for 3026 independent reflections, 203 parameters, Flack parameter = 0.03(3), the largest and minimal peaks in the final difference map 0.21 and -0.18 e/Å<sup>3</sup>. Full crystallographic details have been deposited at Cambridge Crystallographic Data Centre (CCDC). Any request to the CCDC for these materials should quote the full literature citation and reference number CCDC 2108578. The molecular structure of compound 51a is shown in Figure S3.

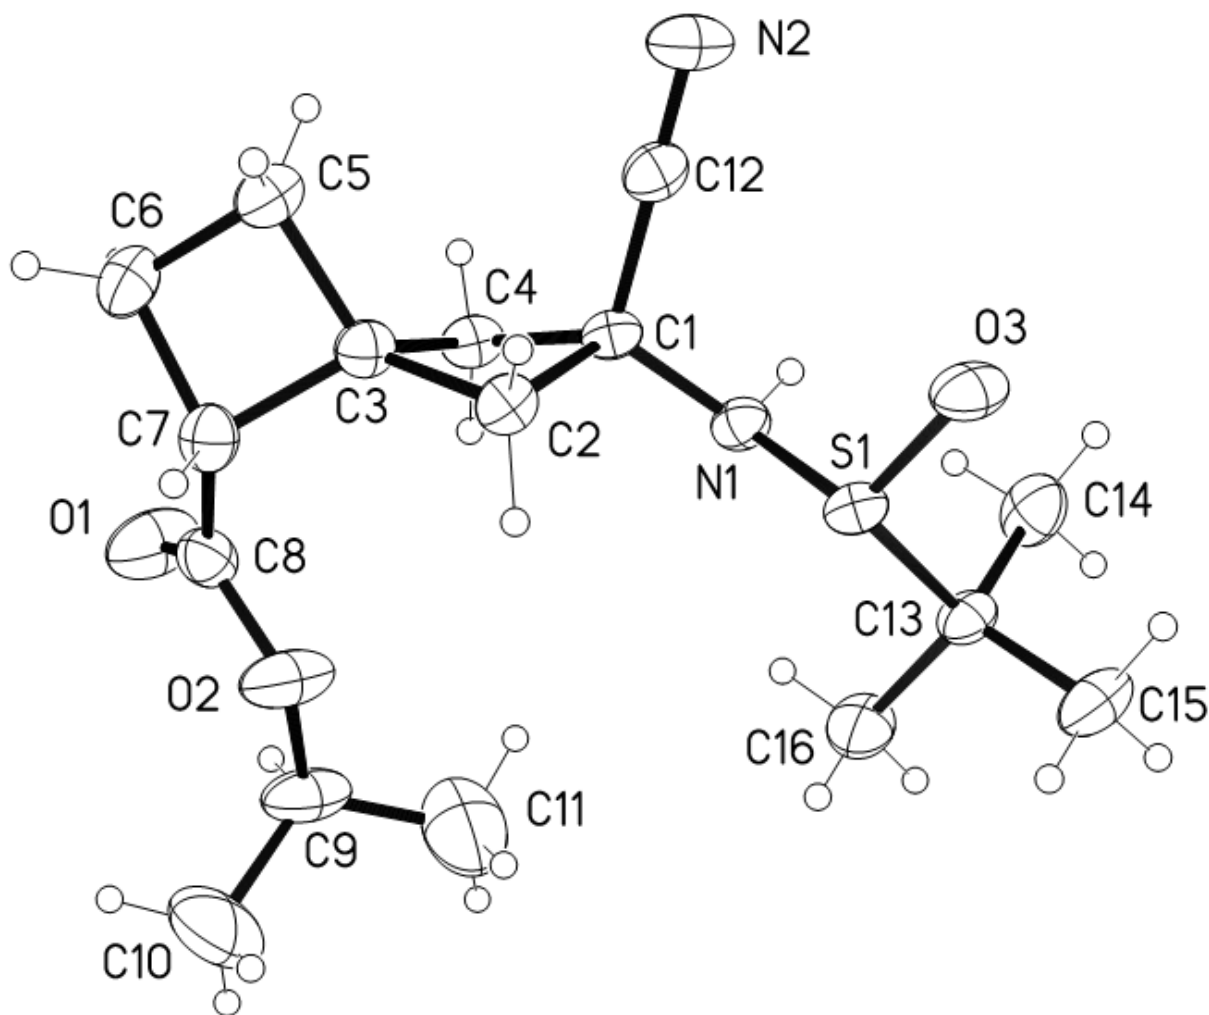

**Figure S3.** ORTEP diagram of compound 51a including thermal displacement ellipses with 50% probability.

**Crystal data for compound 51b:** C<sub>16</sub>H<sub>26</sub>N<sub>2</sub>O<sub>3</sub>S, M = 326.45, monoclinic, space group *P*2<sub>1</sub>, *a* = 9.705(3), *b* 8.9445(19), *c* = 11.226(2) Å,  $\beta$  = 110.390(4)°, *V* = 913.4(4) Å<sup>3</sup>, *Z* = 2, *d*<sub>c</sub> = 1.187 g·cm<sup>-3</sup>,  $\mu$  = 0.190 mm<sup>-1</sup>, *F*(000) = 352, crystal size ca. 0.19 × 0.26 × 0.32 mm. All crystallographic measurements were performed at 173 K on a Bruker Smart Apex II diffractometer operating in the  $\omega$  scans mode. The intensity data were collected within the  $\theta_{\max} \leq 27.26^\circ$  using Mo-K $\alpha$  radiation ( $\lambda$  = 0.71073 Å). The intensities of 14266 reflections were collected (4062 unique reflections, *R*<sub>me</sub>*R*<sub>g</sub> = 0.0498). The structure was solved by direct methods and refined by the full-matrix least-squares technique in the anisotropic approximation for non-hydrogen atoms using the Bruker SHELXTL program package.<sup>1</sup> All CH hydrogen atoms were

placed at calculated positions and refined as 'riding' model, and NH hydrogen atom was found in DF synthesis of the electron density maps and refined isotropically. Convergence was obtained at *R*<sub>1</sub> = 0.0428 and *wR*<sub>2</sub> = 0.0913 for 3359 observed reflections with  $I \geq 2\sigma(I)$ , *R*<sub>1</sub> = 0.0579 and *wR*<sub>2</sub> = 0.0974, GOF = 1.049 for 4062 independent reflections, 203 parameters, Flack parameter = -0.04(4), the largest and minimal peaks in the final difference map 0.22 and -0.22 e/Å<sup>3</sup>. Full crystallographic details have been deposited at Cambridge Crystallographic Data Centre (CCDC). Any request to the CCDC for these materials should quote the full literature citation and reference number CCDC 2108579. The molecular structure of compound **51b** is shown in Figure S4.

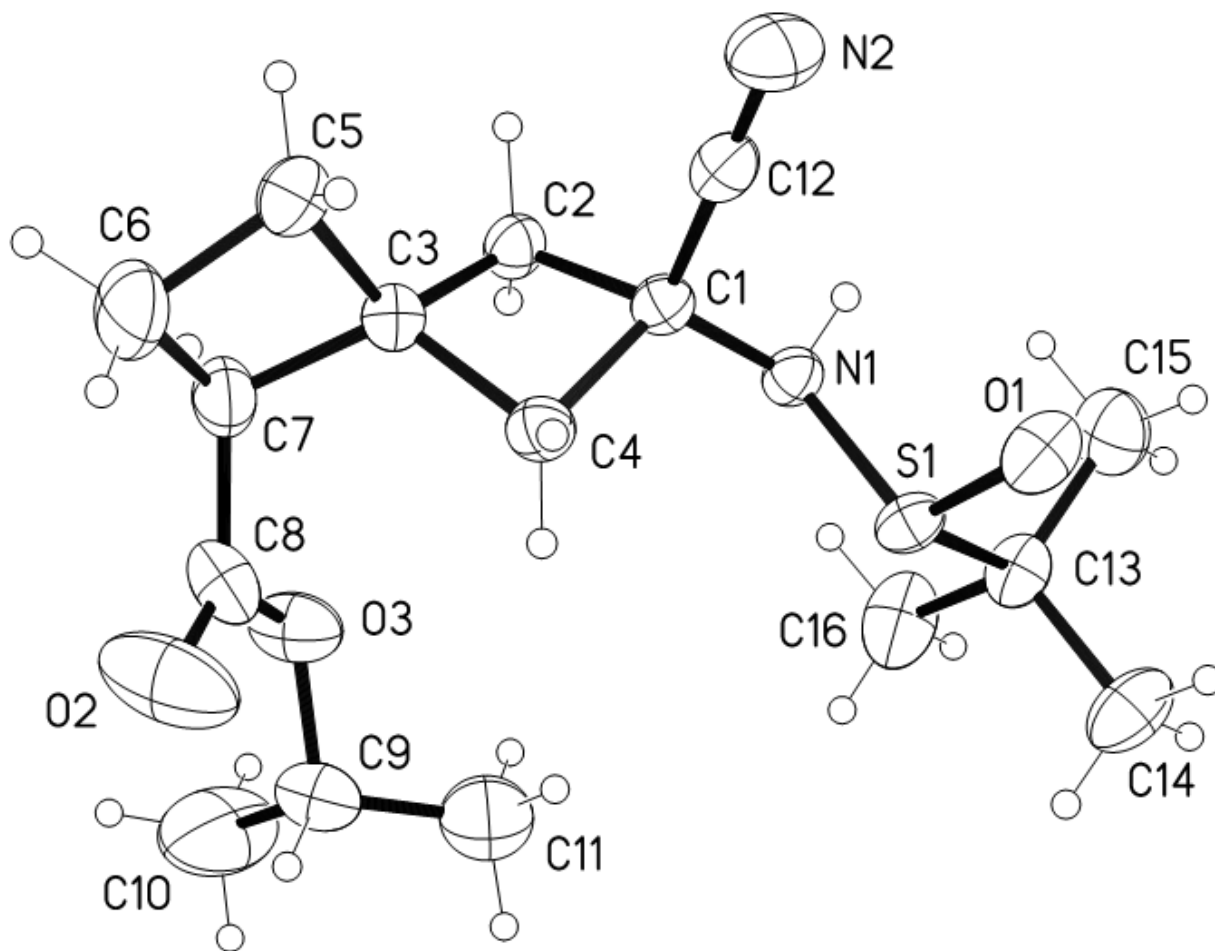

**Figure S4.** ORTEP diagram of compound **51b** including thermal displacement ellipsoids with 50% probability.



**Crystal data for compound 52a:** C<sub>16</sub>H<sub>26</sub>N<sub>2</sub>O<sub>3</sub>S, M = 326.45, orthorhombic, space group *P2<sub>1</sub>2<sub>1</sub>2<sub>1</sub>*, *a* = 9.5944(16), *b* = 12.7794(19), *c* = 14.847(3) Å, *V* = 1820.4(6) Å<sup>3</sup>, *Z* = 4, *d<sub>c</sub>* = 1.191 g·cm<sup>-3</sup>, *μ* = 0.191 mm<sup>-1</sup>, *F*(000) = 704, crystal size ca. 0.17 × 0.30 × 0.45 mm. All crystallographic measurements were performed at 173 K on a Bruker Smart Apex II diffractometer operating in the  $\omega$  scans mode. The intensity data were collected within the  $\theta_{\max} \leq 26.0^\circ$  using Mo-K $\alpha$  radiation ( $\lambda = 0.71073$  Å). The intensities of 17158 reflections were collected (3577 unique reflections, *R<sub>meR<sub>g</sub></sub>* = 0.0496). The structure was solved by direct methods and refined by the full-matrix least-squares technique in the anisotropic approximation for non-hydrogen atoms using the Bruker SHELXTL program package.<sup>1</sup> All CH hydrogen

atoms were placed at calculated positions and refined as 'riding' model, and NH hydrogen atom was found in DF synthesis of the electron density maps and refined isotropically. Convergence was obtained at *R<sub>1</sub>* = 0.0384 and *wR<sub>2</sub>* = 0.0763 for 2998 observed reflections with  $I \geq 2\sigma(I)$ , *R<sub>1</sub>* = 0.0511 and *wR<sub>2</sub>* = 0.0812, GOF = 1.034 for 3577 independent reflections, 206 parameters, Flack parameter = 0.04(4), the largest and minimal peaks in the final difference map 0.22 and -0.23 e/Å<sup>3</sup>. Full crystallographic details have been deposited at Cambridge Crystallographic Data Centre (CCDC). Any request to the CCDC for these materials should quote the full literature citation and reference number CCDC 2108580. The molecular structure of compound **52a** is shown in Figure S5.

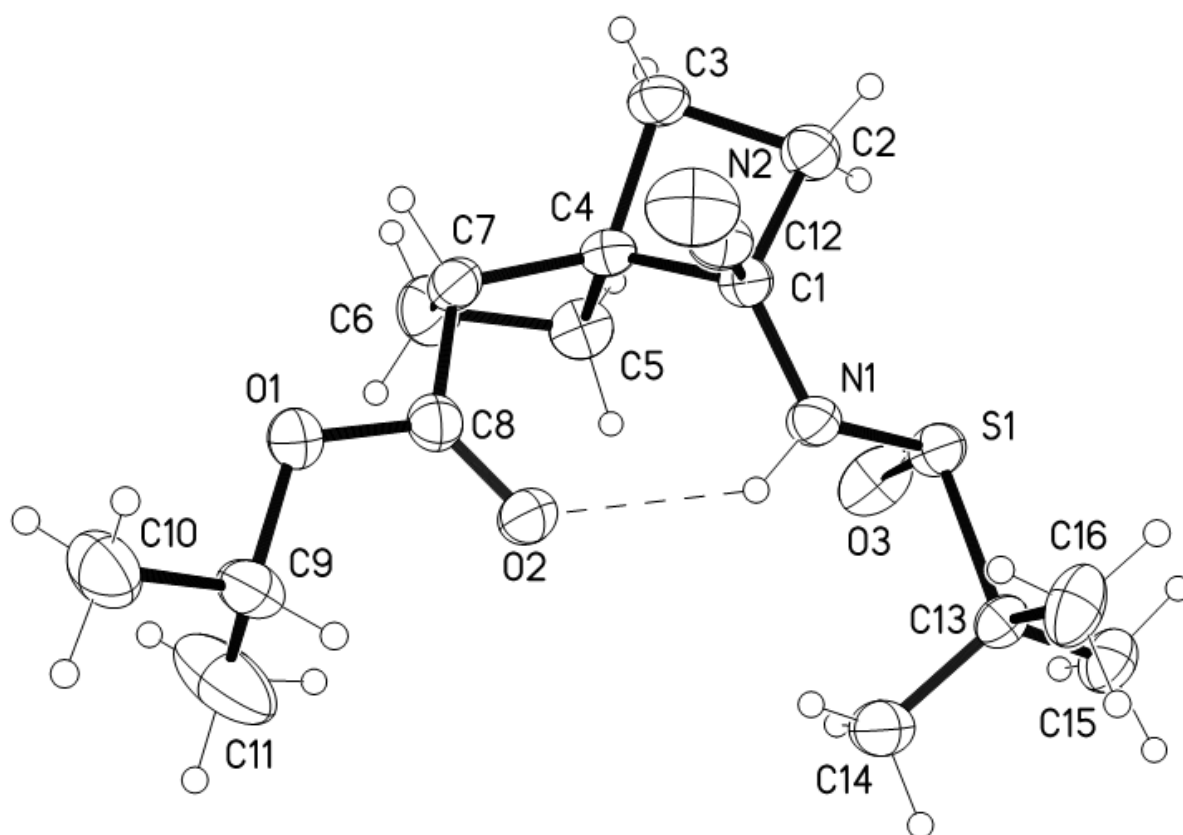

**Figure S5.** ORTEP diagram of compound **52a** including thermal displacement ellipsoids with 50% probability.

**Crystal data for compound 52b:** C<sub>16</sub>H<sub>26</sub>N<sub>2</sub>O<sub>3</sub>S, M = 326.45, hexagonal, space group *P6<sub>5</sub>*, *a* = 11.311(3), *c* = 25.025(16) Å, *V* = 2773(2) Å<sup>3</sup>, *Z* = 6, *d<sub>c</sub>* = 1.173 g·cm<sup>-3</sup>, *μ* = 0.188 mm<sup>-1</sup>, *F*(000) = 1056, crystal size ca. 0.14 × 0.33 × 0.36 mm. All crystallographic measurements were performed at 173 K on a Bruker Smart Apex II diffractometer operating in the *ω* scans mode. The intensity data were collected within the *θ*<sub>max</sub> ≤ 26.4° using Mo-K<sub>α</sub> radiation (*λ* = 0.71073 Å). The intensities of 30833 reflections were collected (3791 unique reflections, *R*<sub>meR<sub>g</sub></sub> = 0.0847). The structure was solved by direct methods and refined by the full-matrix least-squares technique in the anisotropic approximation for non-hydrogen atoms using the Bruker SHELXTL program package.<sup>1</sup> All CH hydrogen atoms were placed at calculated

positions and refined as 'riding' model, and NH hydrogen atom was found in DF synthesis of the electron density maps and refined isotropically. Convergence was obtained at *R*<sub>1</sub> = 0.0401 and *wR*<sub>2</sub> = 0.0701 for 2854 observed reflections with *I* ≥ 2σ(*I*), *R*<sub>1</sub> = 0.0697 and *wR*<sub>2</sub> = 0.0807, GOF = 1.013 for 3791 independent reflections, 208 parameters, Flack parameter = 0.05(5), the largest and minimal peaks in the final difference map 0.18 and -0.23 e/Å<sup>3</sup>. Full crystallographic details have been deposited at Cambridge Crystallographic Data Centre (CCDC). Any request to the CCDC for these materials should quote the full literature citation and reference number CCDC 2108581. The molecular structure of compound **52b** is shown in Figure S6.

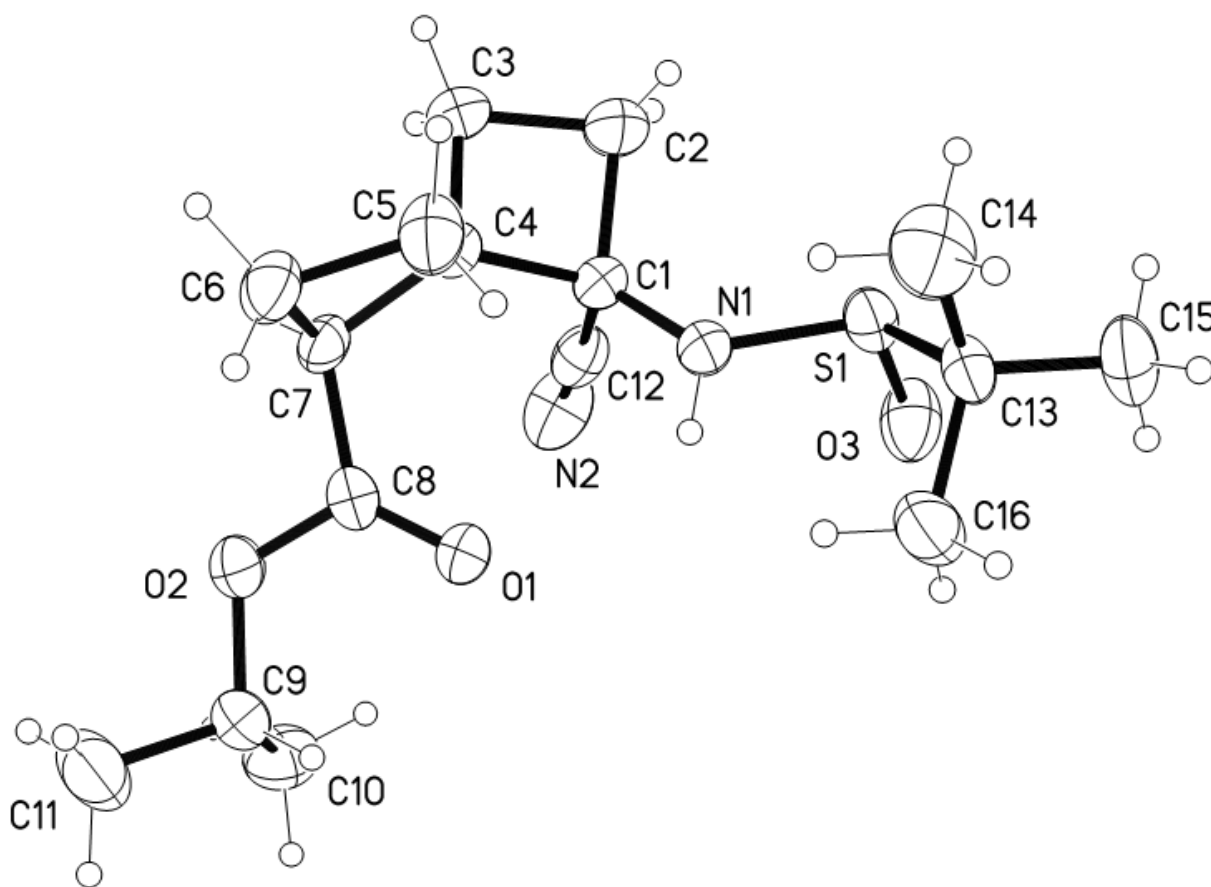

**Figure S6.** ORTEP diagram of compound **52b** including thermal displacement ellipsoids with 50% probability.

**Crystal data for compound 53a:** C<sub>16</sub>H<sub>26</sub>N<sub>2</sub>O<sub>3</sub>S, C<sub>9</sub> H<sub>10</sub> N<sub>2</sub> O, M = 488.64, orthorhombic, space group *P*2<sub>1</sub>2<sub>1</sub>2<sub>1</sub>, *a* = 11.3229(14), *b* = 12.9953(15), *c* = 17.423(2) Å, *V* = 2563.7(5) Å<sup>3</sup>, *Z* = 4, *d*<sub>c</sub> = 1.266 g·cm<sup>-3</sup>, *μ* = 0.164 mm<sup>-1</sup>, *F*(000) = 1048, crystal size ca. 0.22 × 0.26 × 0.37 mm. All crystallographic measurements were performed at 138K on a Bruker Smart Apex II diffractometer operating in the  $\omega$  scans mode. The intensity data were collected within the  $\theta_{\max} \leq 25.5^\circ$  using Mo-K $\alpha$  radiation ( $\lambda = 0.71073$  Å). The intensities of 26501 reflections were collected (4768 unique reflections, *R*<sub>meR<sub>g</sub></sub> = 0.0734). The structure was solved by direct methods and refined by the full-matrix least-squares technique in the anisotropic approximation for non-hydrogen atoms using the Bruker SHELXTL program

package.<sup>1</sup> All CH hydrogen atoms were placed at calculated positions and refined as 'riding' model, and NH hydrogen atom was found in DF synthesis of the electron density maps and refined isotropically. Convergence was obtained at *R*<sub>1</sub> = 0.0401 and *wR*<sub>2</sub> = 0.0767 for 3834 observed reflections with  $I \geq 2\sigma(I)$ , *R*<sub>1</sub> = 0.0605 and *wR*<sub>2</sub> = 0.0838, GOF = 1.028 for 4768 independent reflections, 318 parameters, Flack parameter = -0.04(5), the largest and minimal peaks in the final difference map 0.18 and -0.20 e/Å<sup>3</sup>. Full crystallographic details have been deposited at Cambridge Crystallographic Data Centre (CCDC). Any request to the CCDC for these materials should quote the full literature citation and reference number CCDC 2108582. The molecular structure of compound 53a is shown in Figure S7.

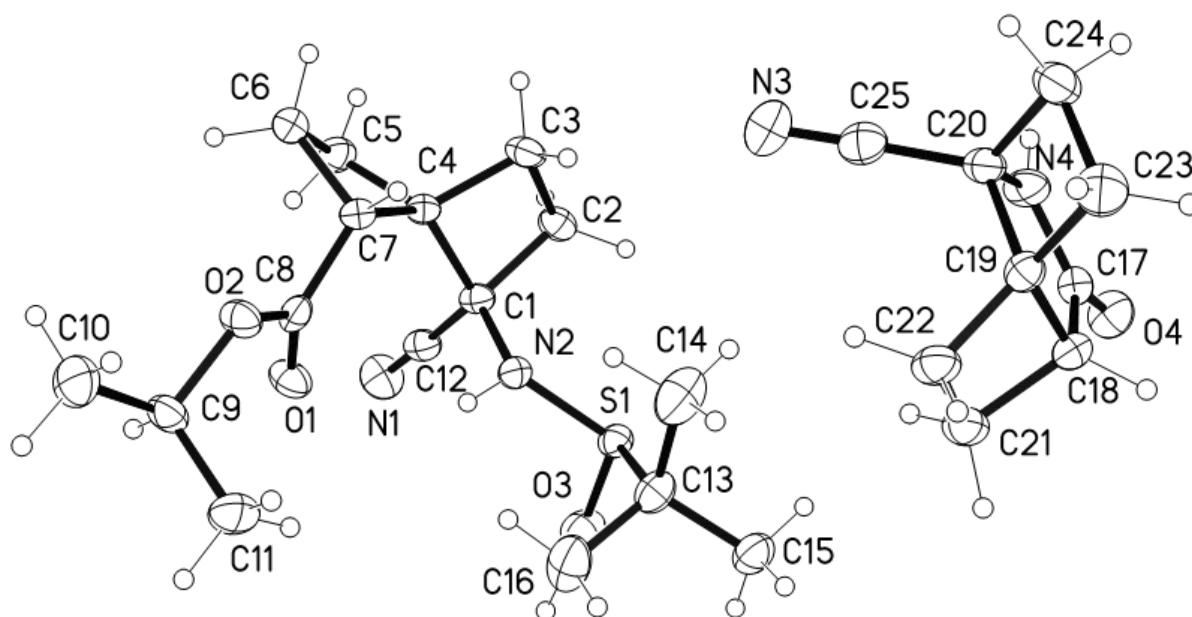

**Figure S7.** ORTEP diagram of compound 53a including thermal displacement ellipsoids with 50% probability.

**Crystal data for compound 54b:** C<sub>16</sub>H<sub>26</sub>N<sub>2</sub>O<sub>3</sub>S, M = 326.45, trigonal, space group *P*3<sub>1</sub>, *a* = 9.7014(14), *c* = 16.297(3) Å, *V* = 1328.3(4) Å<sup>3</sup>, *Z* = 3, *d*<sub>c</sub> = 1.224 g·cm<sup>-3</sup>, *μ* = 0.196 mm<sup>-1</sup>, *F*(000) = 528, crystal size ca. 0.10 × 0.12 × 0.46 mm. All crystallographic measurements were performed at 173 K on a Bruker Smart Apex II diffractometer operating in the *ω* scans mode. The intensity data were collected within the *θ*<sub>max</sub> ≤ 25.5° using Mo-K<sub>α</sub> radiation (*λ* = 0.71073 Å). The intensities of 8230 reflections were collected (2879 unique reflections, *R*<sub>meR<sub>g</sub></sub> = 0.0634). The structure was solved by direct methods and refined by the full-matrix least-squares technique in the anisotropic approximation for non-hydrogen atoms using the Bruker SHELXTL program package.<sup>1</sup> All CH hydrogen atoms were placed at calculated

positions and refined as 'riding' model, and NH hydrogen atom was found in DF synthesis of the electron density maps and refined isotropically. Convergence was obtained at *R*<sub>1</sub> = 0.0394 and *wR*<sub>2</sub> = 0.0656 for 2074 observed reflections with *I* ≥ 2σ(*I*), *R*<sub>1</sub> = 0.0599 and *wR*<sub>2</sub> = 0.0708, GOF = 0.728 for 2879 independent reflections, 203 parameters, Flack parameter = 0.11(7), the largest and minimal peaks in the final difference map 0.15 and -0.17 e/Å<sup>3</sup>. Full crystallographic details have been deposited at Cambridge Crystallographic Data Centre (CCDC). Any request to the CCDC for these materials should quote the full literature citation and reference number CCDC 2108583. The molecular structure of compound **54b** is shown in Figure S8.

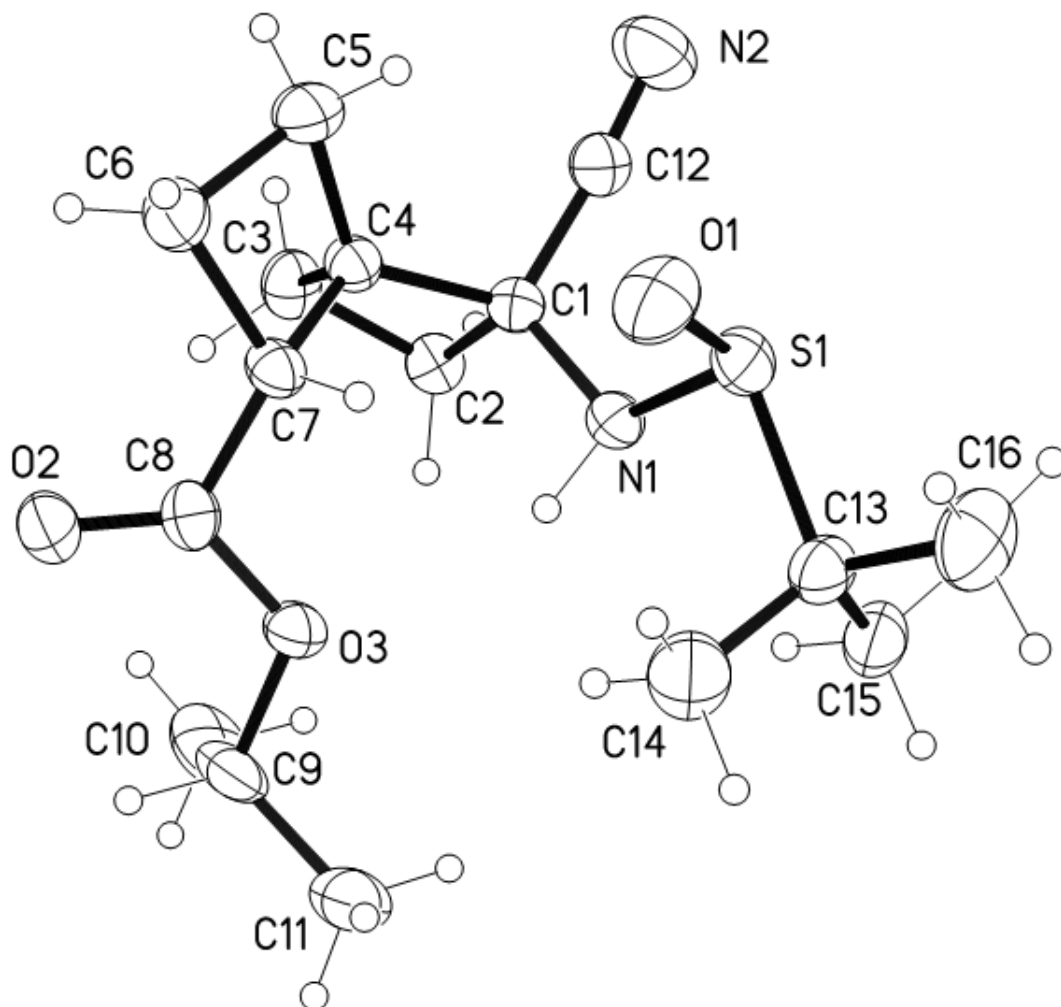

**Figure S8.** ORTEP diagram of compound **54b** including thermal displacement ellipsoids with 50% probability.

**Crystal data for compound 55a:** C<sub>16</sub>H<sub>26</sub>N<sub>2</sub>O<sub>3</sub>S, M = 326.45, trigonal, space group *P*3<sub>1</sub>, *a* = 10.673(3), *c* = 13.675(8) Å, *V* = 1349.0(12) Å<sup>3</sup>, *Z* = 3, *d*<sub>c</sub> = 1.206 g·cm<sup>-3</sup>, *μ* = 0.193 mm<sup>-1</sup>, *F*(000) = 528, crystal size ca. 0.13 × 0.13 × 0.50 mm. All crystallographic measurements were performed at 173 K on a Bruker Smart Apex II diffractometer operating in the *ω* scans mode. The intensity data were collected within the *θ*<sub>max</sub> ≤ 26.4° using Mo-K<sub>α</sub> radiation (*λ* = 0.71073 Å). The intensities of 4749 reflections were collected (3326 unique reflections, *R*<sub>meR<sub>g</sub></sub> = 0.0673). The structure was solved by direct methods and refined by the full-matrix least-squares technique in the anisotropic approximation for non-hydrogen atoms using the Bruker SHELXTL program package.<sup>1</sup> All CH hydrogen atoms were placed at calculated

positions and refined as 'riding' model, and NH hydrogen atom was found in DF synthesis of the electron density maps and refined isotropically. Convergence was obtained at *R*<sub>1</sub> = 0.0679 and *wR*<sub>2</sub> = 0.1142 for 1947 observed reflections with *I* ≥ 2σ(*I*), *R*<sub>1</sub> = 0.1236 and *wR*<sub>2</sub> = 0.1409, GOF = 0.944 for 3326 independent reflections, 203 parameters, Flack parameter = -0.14(16), the largest and minimal peaks in the final difference map 0.28 and -0.40 e/Å<sup>3</sup>. Full crystallographic details have been deposited at Cambridge Crystallographic Data Centre (CCDC). Any request to the CCDC for these materials should quote the full literature citation and reference number CCDC 2108584. The molecular structure of compound 55a is shown in Figure S9.

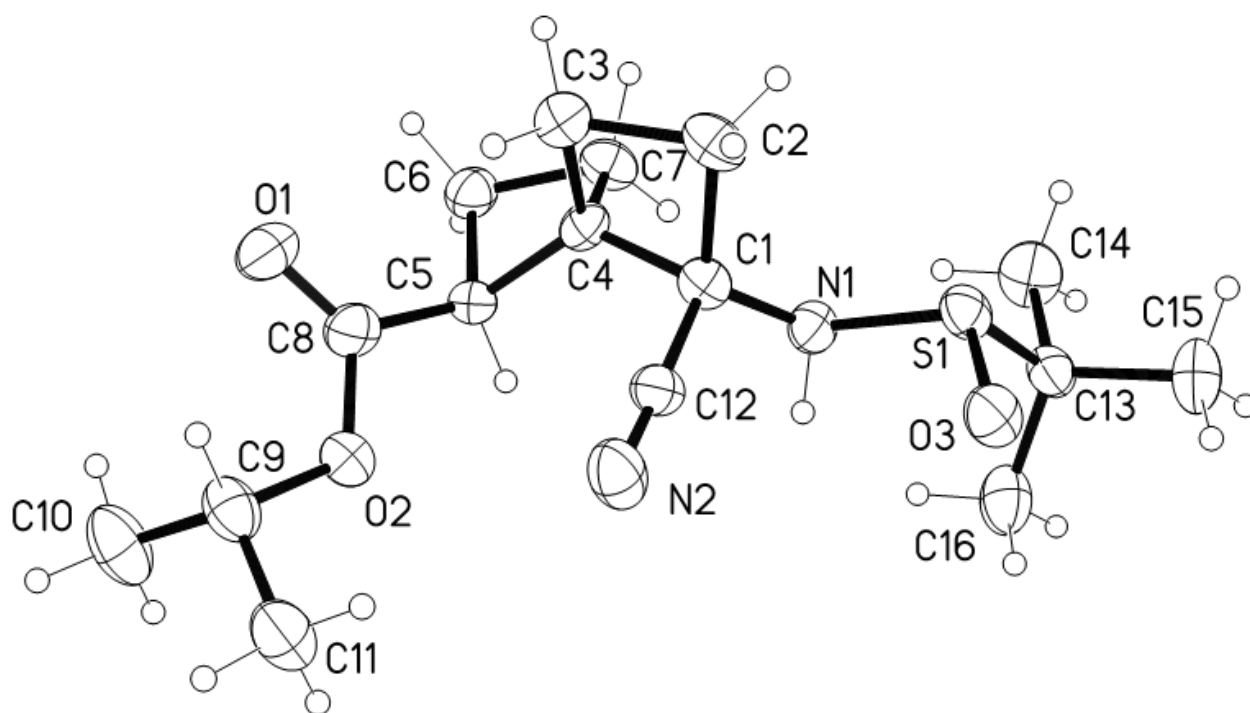

**Figure S9.** ORTEP diagram of compound 55a including thermal displacement ellipses with 50% probability.

**Crystal data for compound 59:**  $C_{16}H_{26}N_2O_3S$ ,  $M = 326.45$ , trigonal, space group  $P3_2$ ,  $a = 9.6924(9)$ ,  $c = 16.293(4)\text{\AA}$ ,  $V = 1325.5(4)\text{\AA}^3$ ,  $Z = 3$ ,  $d_c = 1.227\text{ g}\cdot\text{cm}^{-3}$ ,  $\mu = 0.197\text{ mm}^{-1}$ ,  $F(000) = 528$ , crystal size ca.  $0.07 \times 0.36 \times 0.50\text{ mm}$ . All crystallographic measurements were performed at 173 K on a Bruker Smart Apex II diffractometer operating in the  $\omega$  scans mode. The intensity data were collected within the  $\theta_{\text{max}} \leq 25.5^\circ$  using Mo- $K\alpha$  radiation ( $\lambda = 0.71073\text{ \AA}$ ). The intensities of 7786 reflections were collected (2911 unique reflections,  $R_{\text{meRg}} = 0.0529$ ). The structure was solved by direct methods and refined by the full-matrix least-squares technique in the anisotropic approximation for non-hydrogen atoms using the Bruker SHELXTL program package.<sup>1</sup> All CH hydrogen atoms were placed at calculated positions and refined as 'riding' model, and NH hydrogen

atom was found in DF synthesis of the electron density maps and refined isotropically. Convergence was obtained at  $R_1 = 0.0815$  and  $wR_2 = 0.3003$  for 2449 observed reflections with  $I \geq 2\sigma(I)$ ,  $R_1 = 0.0923$  and  $wR_2 = 0.3115$ ,  $\text{GOF} = 1.143$  for 2911 independent reflections, 206 parameters, Flack parameter = 0.06(5), the largest and minimal peaks in the final difference map 0.55 and  $-0.45\text{ e}/\text{\AA}^3$ . Full crystallographic details have been deposited at Cambridge Crystallographic Data Centre (CCDC). Any request to the CCDC for these materials should quote the full literature citation and reference number CCDC 2108585. The molecular structure of compound [59 is shown in Figure S10.

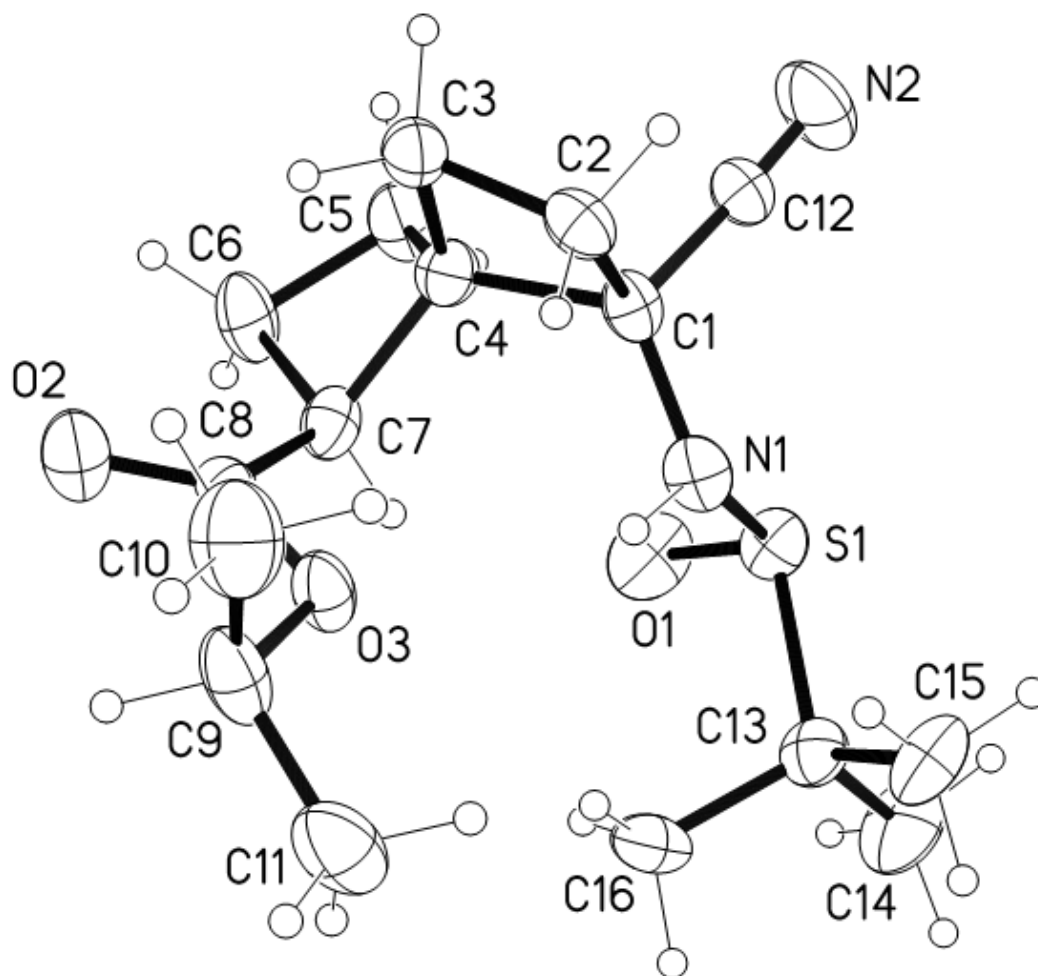

**Figure S10.** ORTEP diagram of compound 59 including thermal displacement ellipsoids with 50% probability.

**Crystal data for compound 60:** C<sub>16</sub>H<sub>26</sub>N<sub>2</sub>O<sub>3</sub>S, M = 326.45, trigonal, space group *P*3<sub>2</sub>, *a* = 10.6671(8), *c* = 13.665(2) Å, *V* = 1346.5(3) Å<sup>3</sup>, *Z* = 3, *d*<sub>c</sub> = 1.208 g·cm<sup>-3</sup>, *μ* = 0.194 mm<sup>-1</sup>, *F*(000) = 528, crystal size ca. 0.14 × 0.13 × 0.50 mm. All crystallographic measurements were performed at 173 K on a Bruker Smart Apex II diffractometer operating in the *ω* scans mode. The intensity data were collected within the *θ*<sub>max</sub> ≤ 26.0° using Mo-K<sub>α</sub> radiation (*λ* = 0.71073 Å). The intensities of 10864 reflections were collected (3414 unique reflections, *R*<sub>meR<sub>g</sub></sub> = 0.0537). The structure was solved by direct methods and refined by the full-matrix least-squares technique in the anisotropic approximation for non-hydrogen atoms using the Bruker SHELXTL program package.<sup>1</sup> All CH hydrogen atoms were placed at calculated

positions and refined as 'riding' model, and NH hydrogen atom was found in DF synthesis of the electron density maps and refined isotropically. Convergence was obtained at *R*<sub>1</sub> = 0.0391 and *wR*<sub>2</sub> = 0.0708 for 2876 observed reflections with *I* ≥ 2σ(*I*), *R*<sub>1</sub> = 0.0505 and *wR*<sub>2</sub> = 0.0735, GOF = 0.955 for 3414 independent reflections, 206 parameters, Flack parameter = -0.01(4), the largest and minimal peaks in the final difference map 0.18 and -0.26 e/Å<sup>3</sup>. Full crystallographic details have been deposited at Cambridge Crystallographic Data Centre (CCDC). Any request to the CCDC for these materials should quote the full literature citation and reference number CCDC 2108586. The molecular structure of compound 60 is shown in Figure S11.

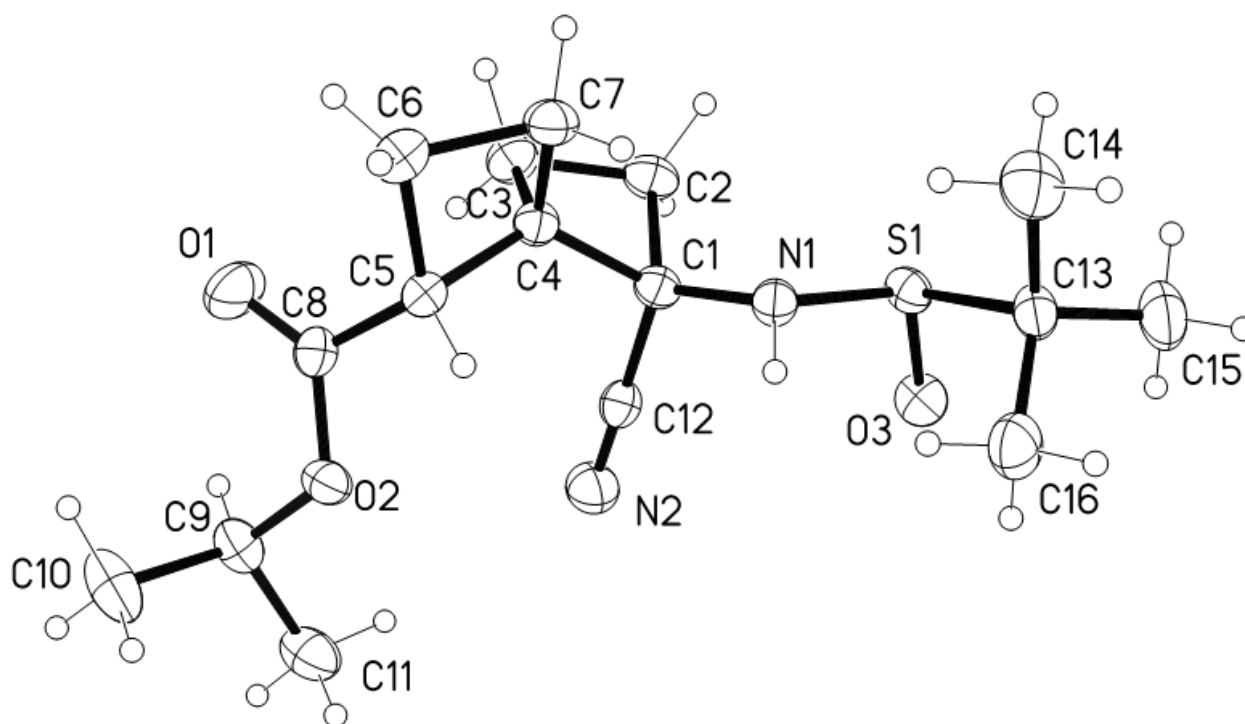

**Figure S11.** ORTEP diagram of compound 60 including thermal displacement ellipsoids with 50% probability.

**Crystal data for compound 62a:** C<sub>16</sub>H<sub>26</sub>N<sub>2</sub>O<sub>3</sub>S, M = 326.45, monoclinic, space group *P*2<sub>1</sub>, *a* = 6.1605(12), *b* = 9.3672(16), *c* = 32.178(7) Å,  $\beta$  = 94.850(8)°, *V* = 1850.2(6) Å<sup>3</sup>, *Z* = 4, *d*<sub>c</sub> = 1.172 g·cm<sup>-3</sup>,  $\mu$  = 0.188 mm<sup>-1</sup>, *F*(000) = 704, crystal size ca. 0.08 × 0.16 × 0.50 mm. All crystallographic measurements were performed at 173 K on a Bruker Smart Apex II diffractometer operating in the  $\omega$  scans mode. The intensity data were collected within the  $\theta_{\max} \leq 25.5^\circ$  using Mo-K $\alpha$  radiation ( $\lambda = 0.71073$  Å). The intensities of 17702 reflections were collected (6575 unique reflections, *R*<sub>me</sub>*R*<sub>g</sub> = 0.0510). The structure was solved by direct methods and refined by the full-matrix least-squares technique in the anisotropic approximation for non-hydrogen atoms using the Bruker SHELXTL program package.<sup>1</sup> All CH hydrogen

atoms were placed at calculated positions and refined as 'riding' model, and NH hydrogen atom was found in DF synthesis of the electron density maps and refined isotropically. Convergence was obtained at *R*<sub>1</sub> = 0.0512 and *wR*<sub>2</sub> = 0.0985 for 5257 observed reflections with  $I \geq 2\sigma(I)$ , *R*<sub>1</sub> = 0.0692 and *wR*<sub>2</sub> = 0.1060, GOF = 1.010 for 6575 independent reflections, 479 parameters, Flack parameter = 0.03(5), the largest and minimal peaks in the final difference map 0.26 and -0.23 e/Å<sup>3</sup>. Full crystallographic details have been deposited at Cambridge Crystallographic Data Centre (CCDC). Any request to the CCDC for these materials should quote the full literature citation and reference number CCDC 2108587. The molecular structure of compound **62a** is shown in Figure S12.

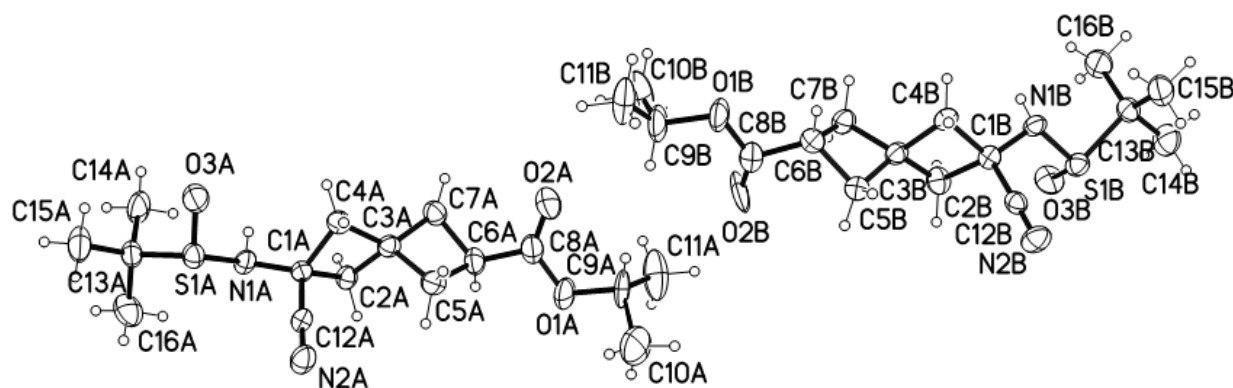

**Figure S12.** ORTEP diagram of compound **62a** including thermal displacement ellipsoids with 50% probability (two independent molecules are shown).



**Crystal data for compound 62b:** C<sub>16</sub>H<sub>26</sub>N<sub>2</sub>O<sub>3</sub>S, M = 326.45, orthorhombic, space group *P2<sub>1</sub>2<sub>1</sub>2<sub>1</sub>*, *a* = 7.0729(19), *b* = 9.1807(18), *c* = 28.272(6) Å, *V* = 1835.8(7) Å<sup>3</sup>, *Z* = 4, *d<sub>c</sub>* = 1.181 g·cm<sup>-3</sup>, *μ* = 0.189 mm<sup>-1</sup>, *F*(000) = 704, crystal size ca. 0.03 × 0.12 × 0.56 mm. All crystallographic measurements were performed at 173 K on a Bruker Smart Apex II diffractometer operating in the *ω* scans mode. The intensity data were collected within the *θ*<sub>max</sub> ≤ 26.4° using Mo-K<sub>α</sub> radiation (*λ* = 0.71073 Å). The intensities of 19832 reflections were collected (3753 unique reflections, *R*<sub>me</sub>*R*<sub>g</sub> = 0.0726. The structure was solved by direct methods and refined by the full-matrix least-squares technique in the anisotropic approximation for non-hydrogen atoms using the Bruker SHELXTL program package.<sup>1</sup> All CH hydrogen atoms were

placed at calculated positions and refined as 'riding' model, and NH hydrogen atom was found in DF synthesis of the electron density maps and refined isotropically. Convergence was obtained at *R*<sub>1</sub> = 0.0492 and *wR*<sub>2</sub> = 0.1010 for 2940 observed reflections with *I* ≥ 2σ(*I*), *R*<sub>1</sub> = 0.0707 and *wR*<sub>2</sub> = 0.1110, GOF = 1.026 for 3753 independent reflections, 206 parameters, Flack parameter = 0.04(6), the largest and minimal peaks in the final difference map 0.27 and -0.25 e/Å<sup>3</sup>. Full crystallographic details have been deposited at Cambridge Crystallographic Data Centre (CCDC). Any request to the CCDC for these materials should quote the full literature citation and reference number CCDC 2108588. The molecular structure of compound **62b** is shown in Figure S13.

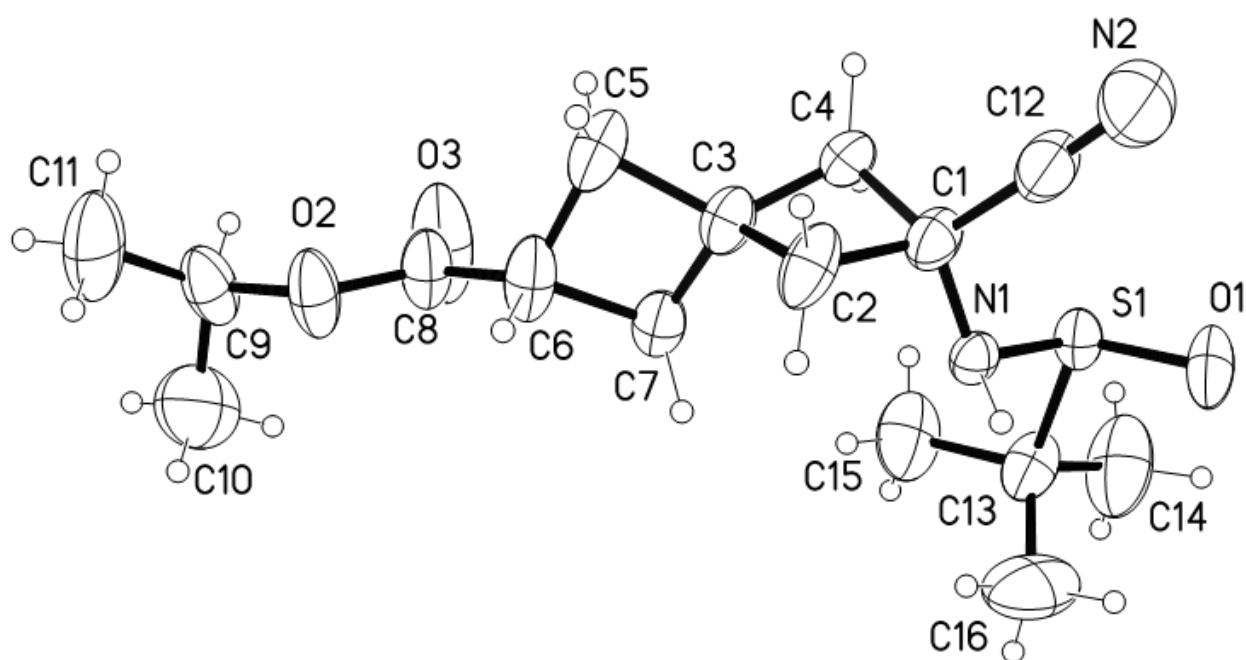

**Figure S13.** ORTEP diagram of compound **62b** including thermal displacement ellipsoids with 50% probability.

Inhibition of *H. Pylori* glutamate racemase by the spiro[3.3]heptane-derived amino acids (dose – response curves)

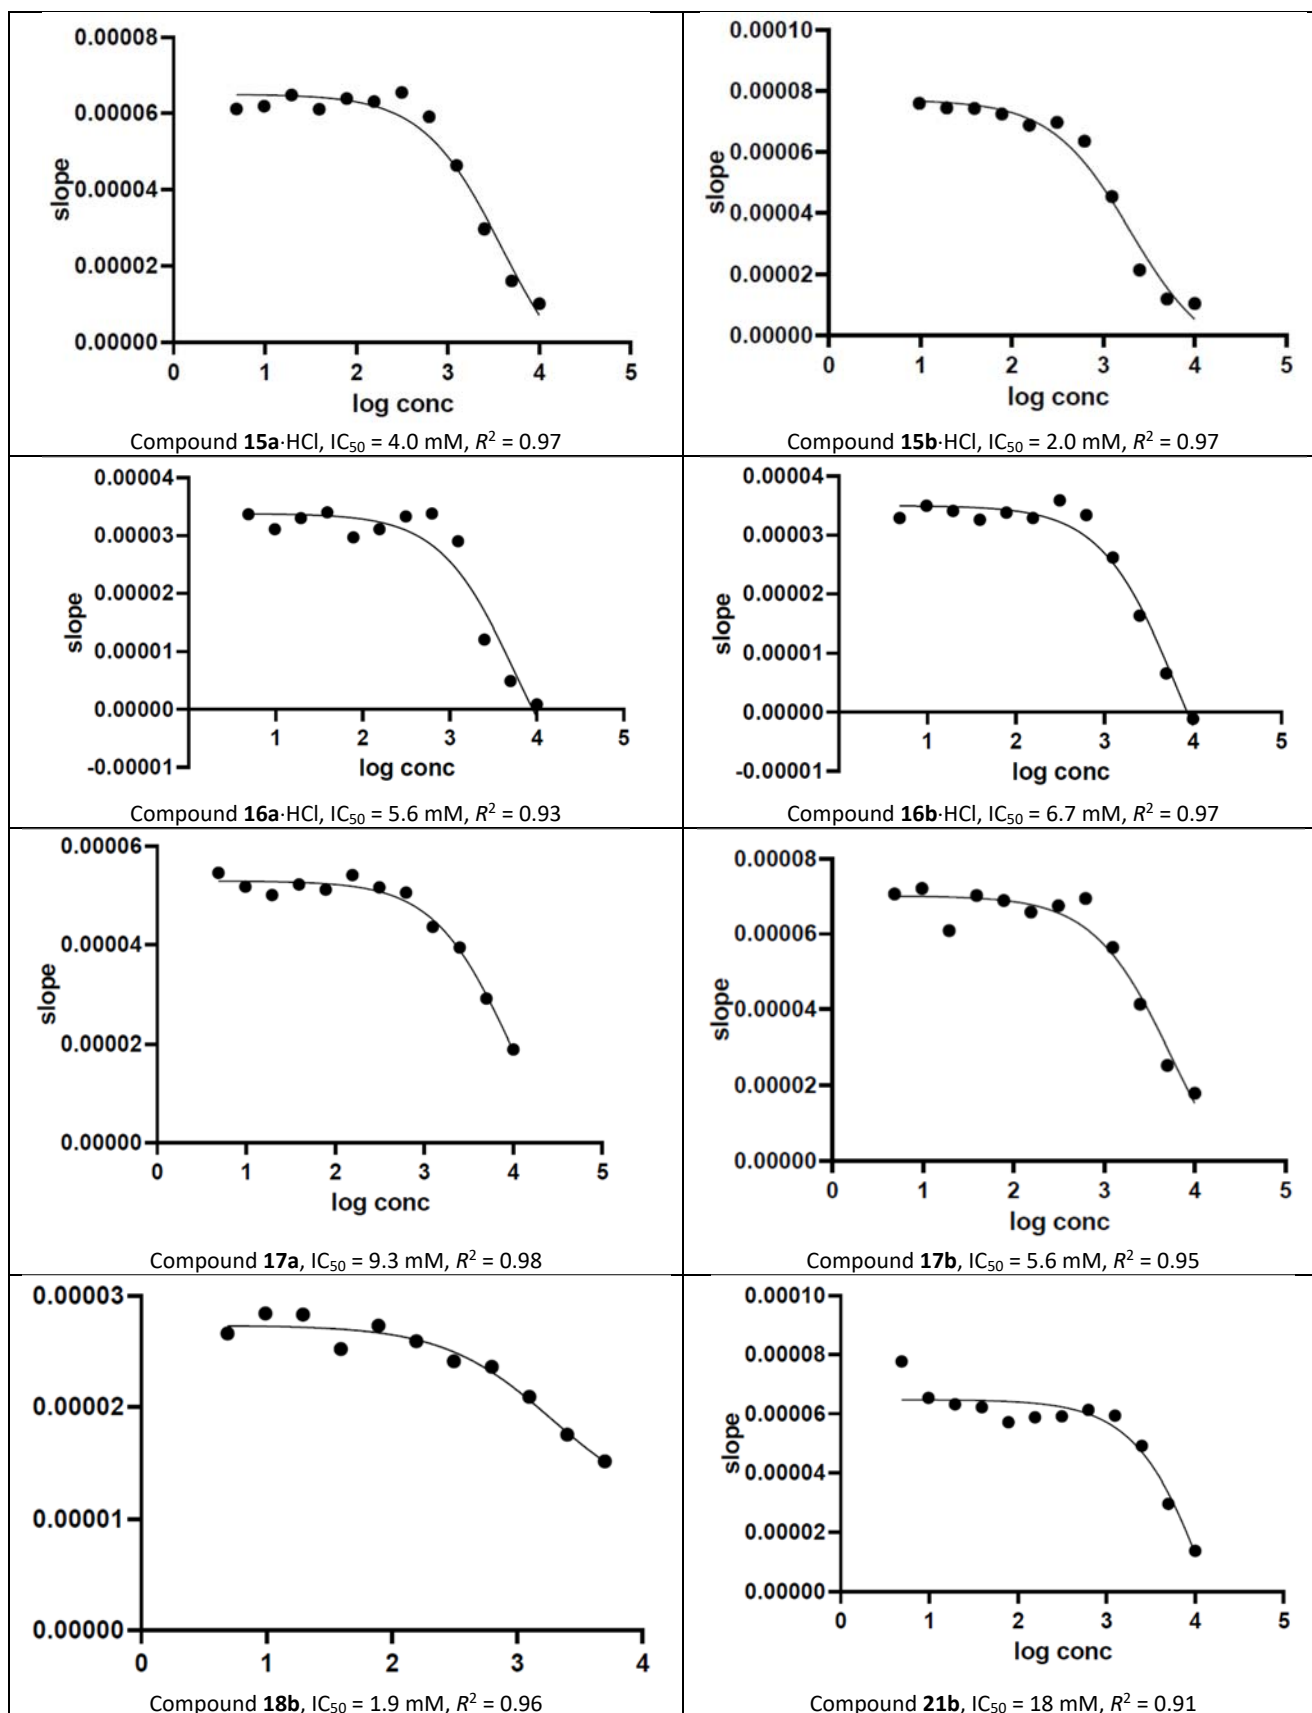

## References

1. G. M. Sheldrick, *Acta Cryst., Sect. A*, 2008, **64**, 112–122.
2. A. L. Spek, *J. Appl. Cryst.* 2003, **36**, 7–13.
3. P. van der Sluis, A. L. Spek, *Acta Cryst.* 1990, **A46**, 194–201.
